# Supplementary material for: CTCF depletion decouples enhancer-mediated gene activation from chromatin hub formation
Source: Springer Nature journal article supplement (doi:10.1038/s41594-025-01555-z), 2025-05-13
Supplement: MOESM1 [file 41594_2025_1555_MOESM1_ESM.pdf › 41594_2025_1555_MOESM1_ESM.pdf]

Reporting Summary

Nature Portfolio wishes to improve the reproducibility of the work that we publish. This form provides structure for consistency and transparency in reporting. For further information on Nature Portfolio policies, see our [Editorial Policies](#) and the [Editorial Policy Checklist](#).

Statistics

For all statistical analyses, confirm that the following items are present in the figure legend, table legend, main text, or Methods section.

|                                     |                                                                                                                                                                                                                                                                                                |
|-------------------------------------|------------------------------------------------------------------------------------------------------------------------------------------------------------------------------------------------------------------------------------------------------------------------------------------------|
| n/a                                 | Confirmed                                                                                                                                                                                                                                                                                      |
| <input type="checkbox"/>            | <input checked="" type="checkbox"/> The exact sample size ( <i>n</i> ) for each experimental group/condition, given as a discrete number and unit of measurement                                                                                                                               |
| <input type="checkbox"/>            | <input checked="" type="checkbox"/> A statement on whether measurements were taken from distinct samples or whether the same sample was measured repeatedly                                                                                                                                    |
| <input type="checkbox"/>            | <input checked="" type="checkbox"/> The statistical test(s) used AND whether they are one- or two-sided<br><i>Only common tests should be described solely by name; describe more complex techniques in the Methods section.</i>                                                               |
| <input checked="" type="checkbox"/> | <input type="checkbox"/> A description of all covariates tested                                                                                                                                                                                                                                |
| <input checked="" type="checkbox"/> | <input type="checkbox"/> A description of any assumptions or corrections, such as tests of normality and adjustment for multiple comparisons                                                                                                                                                   |
| <input type="checkbox"/>            | <input checked="" type="checkbox"/> A full description of the statistical parameters including central tendency (e.g. means) or other basic estimates (e.g. regression coefficient) AND variation (e.g. standard deviation) or associated estimates of uncertainty (e.g. confidence intervals) |
| <input type="checkbox"/>            | <input checked="" type="checkbox"/> For null hypothesis testing, the test statistic (e.g. <i>F</i> , <i>t</i> , <i>r</i> ) with confidence intervals, effect sizes, degrees of freedom and <i>P</i> value noted<br><i>Give P values as exact values whenever suitable.</i>                     |
| <input checked="" type="checkbox"/> | <input type="checkbox"/> For Bayesian analysis, information on the choice of priors and Markov chain Monte Carlo settings                                                                                                                                                                      |
| <input checked="" type="checkbox"/> | <input type="checkbox"/> For hierarchical and complex designs, identification of the appropriate level for tests and full reporting of outcomes                                                                                                                                                |
| <input type="checkbox"/>            | <input checked="" type="checkbox"/> Estimates of effect sizes (e.g. Cohen's <i>d</i> , Pearson's <i>r</i> ), indicating how they were calculated                                                                                                                                               |

Our web collection on [statistics for biologists](#) contains articles on many of the points above.

Software and code

Policy information about [availability of computer code](#)

|                 |                                                                                                                                                                                                                                                                                                                                                                                                                                                                                                                                                                                                                                                                                                                                                                                                                                                                                                                                                                                                                                                                                                                                                                                                     |
|-----------------|-----------------------------------------------------------------------------------------------------------------------------------------------------------------------------------------------------------------------------------------------------------------------------------------------------------------------------------------------------------------------------------------------------------------------------------------------------------------------------------------------------------------------------------------------------------------------------------------------------------------------------------------------------------------------------------------------------------------------------------------------------------------------------------------------------------------------------------------------------------------------------------------------------------------------------------------------------------------------------------------------------------------------------------------------------------------------------------------------------------------------------------------------------------------------------------------------------|
| Data collection | Illumina NextSeq 550.                                                                                                                                                                                                                                                                                                                                                                                                                                                                                                                                                                                                                                                                                                                                                                                                                                                                                                                                                                                                                                                                                                                                                                               |
| Data analysis   | CapCruncher pipeline v.0.2.3 ( <a href="https://github.com/sims-lab/CapCruncher">https://github.com/sims-lab/CapCruncher</a> ); MCC pipeline v.1 ( <a href="https://github.com/joydavies/Micro-Capture-C">https://github.com/joydavies/Micro-Capture-C</a> ), based on scripts available for academic use through the Oxford University Innovation software store (v1; <a href="https://process.innovation.ox.ac.uk/software/p/165294/micro-capture-c-academic/1">https://process.innovation.ox.ac.uk/software/p/165294/micro-capture-c-academic/1</a> ); Bowtie2 v.2.3.5; HiC-Pro v.2.11.1; oligo design tool v.0.1.1b ( <a href="https://oligo.readthedocs.io/en/latest/">https://oligo.readthedocs.io/en/latest/</a> ); MACS2 v.2.1.2; deepTools v.3.3.0; DESeq2 v.1.36.0; NGseqBasic pipeline v.1 ( <a href="https://github.com/Hughes-Genome-Group/NGseqBasic/releases">https://github.com/Hughes-Genome-Group/NGseqBasic/releases</a> ); R v.4.2.0; rtracklayer v.1.56.1; UCSC bigWigMerge v.2; nf-core/rnaseq pipeline v.3.12.0 ( <a href="https://nf-co.re/rnaseq/3.12.0/">https://nf-co.re/rnaseq/3.12.0/</a> ); STAR v.2.6.1d; featureCounts v.2.0.6; cooltools v.0.5.4; FlowJo v.10.8.1. |

For manuscripts utilizing custom algorithms or software that are central to the research but not yet described in published literature, software must be made available to editors and reviewers. We strongly encourage code deposition in a community repository (e.g. GitHub). See the Nature Portfolio [guidelines for submitting code & software](#) for further information.

## Data

Policy information about [availability of data](#)

All manuscripts must include a [data availability statement](#). This statement should provide the following information, where applicable:

- Accession codes, unique identifiers, or web links for publicly available datasets
- A description of any restrictions on data availability
- For clinical datasets or third party data, please ensure that the statement adheres to our [policy](#)

The Micro-Capture-C, Capture-C, Tri-C, ChIPmentation and RNA-seq datasets generated and analyzed for the current study are available from the Gene Expression Omnibus (GEO) as a SuperSeries under accession number GSE263641 (reviewer token: wxmfyuqqrhrcptsh). Reference genome for data from BLaER1 and BLaER1-CTCF-mAID cell lines was human assembly Dec. 2013 (GRCh38/hg38). Reference genome for *Drosophila* spike-in was *D. melanogaster* assembly Aug. 2014 (BDGP Release 6 + ISO1 MT/dm6). Index files were downloaded from Bowtie2 website (<https://bowtie-bio.sourceforge.net/bowtie2/manual.shtml>).

## Research involving human participants, their data, or biological material

Policy information about studies with [human participants or human data](#). See also policy information about [sex, gender \(identity/presentation\), and sexual orientation](#) and [race, ethnicity and racism](#).

|                                                                    |     |
|--------------------------------------------------------------------|-----|
| Reporting on sex and gender                                        | n/a |
| Reporting on race, ethnicity, or other socially relevant groupings | n/a |
| Population characteristics                                         | n/a |
| Recruitment                                                        | n/a |
| Ethics oversight                                                   | n/a |

Note that full information on the approval of the study protocol must also be provided in the manuscript.

## Field-specific reporting

Please select the one below that is the best fit for your research. If you are not sure, read the appropriate sections before making your selection.

☒ Life sciences ☐ Behavioural & social sciences ☐ Ecological, evolutionary & environmental sciences

For a reference copy of the document with all sections, see [nature.com/documents/nr-reporting-summary-flat.pdf](https://nature.com/documents/nr-reporting-summary-flat.pdf)

## Life sciences study design

All studies must disclose on these points even when the disclosure is negative.

|                 |                                                                                                                                                                                                                                                                                                                                                                                                                                                                                                                                                                                                                                          |
|-----------------|------------------------------------------------------------------------------------------------------------------------------------------------------------------------------------------------------------------------------------------------------------------------------------------------------------------------------------------------------------------------------------------------------------------------------------------------------------------------------------------------------------------------------------------------------------------------------------------------------------------------------------------|
| Sample size     | The data presented in the manuscript represent the averages of three biological replicates, which is standard in the field. No statistical method was used to pre-determine sample sizes. These sample sizes were chosen to generate data at sufficient depth and assess differences between conditions robustly. These sample sizes are sufficient, since the observed biological effects of interest are clearly detectable between conditions and robust across replicates. For Micro-Capture-C and Tri-C experiments, multiple technical replicates for each biological replicate were included to boost the complexity of the data. |
| Data exclusions | Two viewpoints (IFNGR2 and TASL) were excluded from the quantifications of Micro-Capture-C and Tri-C experiments due to poor data quality. The capture coordinates targeting promoter in Micro-Capture-C were: IFNGR2 - chr21:33403238-33403358, TASL - chrX:30577754-30577874 and in Tri-C targeting enhancer were: IFNGR2 - chr21:33216352-33216472, TASL - chrX:30596991-30597111.                                                                                                                                                                                                                                                    |
| Replication     | All experiments based on sequencing data were performed for n=3 biologically independent samples as described and all attempts were successful.                                                                                                                                                                                                                                                                                                                                                                                                                                                                                          |
| Randomization   | Samples were randomly allocated into different experimental groups prior to their treatment with auxin or control conditions.                                                                                                                                                                                                                                                                                                                                                                                                                                                                                                            |
| Blinding        | All samples were analyzed with the same pipelines, in which results are generated by scripts without interference of the researchers. Since potential expectations of the researchers cannot influence the data analysis and results, blinding is not relevant to this study.                                                                                                                                                                                                                                                                                                                                                            |

## Reporting for specific materials, systems and methods

We require information from authors about some types of materials, experimental systems and methods used in many studies. Here, indicate whether each material, system or method listed is relevant to your study. If you are not sure if a list item applies to your research, read the appropriate section before selecting a response.

## Materials & experimental systems

| n/a                                 | Involved in the study                                     |
|-------------------------------------|-----------------------------------------------------------|
| <input type="checkbox"/>            | <input checked="" type="checkbox"/> Antibodies            |
| <input type="checkbox"/>            | <input checked="" type="checkbox"/> Eukaryotic cell lines |
| <input checked="" type="checkbox"/> | <input type="checkbox"/> Palaeontology and archaeology    |
| <input checked="" type="checkbox"/> | <input type="checkbox"/> Animals and other organisms      |
| <input checked="" type="checkbox"/> | <input type="checkbox"/> Clinical data                    |
| <input checked="" type="checkbox"/> | <input type="checkbox"/> Dual use research of concern     |
| <input checked="" type="checkbox"/> | <input type="checkbox"/> Plants                           |

## Methods

| n/a                                 | Involved in the study                              |
|-------------------------------------|----------------------------------------------------|
| <input type="checkbox"/>            | <input checked="" type="checkbox"/> ChIP-seq       |
| <input type="checkbox"/>            | <input checked="" type="checkbox"/> Flow cytometry |
| <input checked="" type="checkbox"/> | <input type="checkbox"/> MRI-based neuroimaging    |

## Antibodies

### Antibodies used

Flow cytometry: Human FcR Binding Inhibitor (1:5, eBiosciences, 16-9161-73), APC-Cy7 Mouse Anti-Human CD19 (1:20, BD Pharmingen, 348794), APC Mouse Anti-Human CD11b (1:5, BD Pharmingen, 550019).  
ChIPmentation: Rabbit anti-CTCF (2 µg, Diagenode, C15410210-50), Rabbit anti-SMC1A (2 µg, Abcam, ab9262), Rabbit anti-MED26 (2 µg, Bethyl Laboratories, A302-370), Drosophila spike-in antibody (1 µg, Biozol, 61686).

### Validation

Validation was performed by the manufacturer. The antibodies were purified using immunogen affinity and validated by immunoprecipitation, immunohistochemical analysis, and western blotting.  
- Human FcR Binding Inhibitor (eBiosciences, 16-9161-73) validated for flow cytometry (<https://www.thermofisher.com/antibody/product/Fc-Receptor-Binding-Inhibitor-Antibody-Polyclonal/16-9161-73>).  
- APC-Cy7 Mouse Anti-Human CD19 (BD Pharmingen, 348794) validated for flow cytometry ([https://www.bdbiosciences.com/en-us/products/reagents/flow-cytometry-reagents/clinical-discovery-research/single-color-antibodies-ruo-gmp/apc-cy-7-mouse-anti-human-cd19.348794?tab=format\\_details](https://www.bdbiosciences.com/en-us/products/reagents/flow-cytometry-reagents/clinical-discovery-research/single-color-antibodies-ruo-gmp/apc-cy-7-mouse-anti-human-cd19.348794?tab=format_details)).  
- APC Mouse Anti-Human CD11b (BD Pharmingen, 550019) validated for flow cytometry ([https://www.bdbiosciences.com/en-ca/products/reagents/flow-cytometry-reagents/research-reagents/single-color-antibodies-ruo/apc-mouse-anti-human-cd11b.550019?tab=format\\_details](https://www.bdbiosciences.com/en-ca/products/reagents/flow-cytometry-reagents/research-reagents/single-color-antibodies-ruo/apc-mouse-anti-human-cd11b.550019?tab=format_details)).  
- Rabbit anti-CTCF (2 µg, Diagenode, C15410210-50), ChIP-grade, validated for Western Blot and ChIP-seq (<https://www.diagenode.com/en/p/ctcf-polyclonal-antibody-classic-50-mg>).  
- Rabbit anti-SMC1A (2 µg, Abcam, ab9262) validated for Western Blot and Immunoprecipitation (<https://www.abcam.com/en-us/products/primary-antibodies/smc1a-antibody-ab9262?srsltid=AfmBOopPzSVjxgskl23cisdMQFvcEjvAh9wVoN9u2UgEWLZLY1slpnW#>). Validated for ChIP in Dluhosova et al., 2014: <https://doi.org/10.1371/journal.pone.0092635>.  
- Rabbit anti-MED26 (2 µg, Bethyl Laboratories, A302-370) validated for Western Blot and Immunoprecipitation (<https://www.thermofisher.com/antibody/product/CRSP7-Antibody-Polyclonal/A302-370A>).  
- Drosophila spike-in antibody (1 µg, Biozol, 61686) validated by Active Motif for ChIP-seq spike-in normalisation (<https://www.activemotif.com/catalog/1091/chip-normalization>).

## Eukaryotic cell lines

Policy information about [cell lines and Sex and Gender in Research](#)

### Cell line source(s)

The wild type Human B-cell Precursor Leukemia Cell Line (BLaER1) was a gift from the laboratory of Patrick Cramer (MPI-NAT, Goettingen). This cell line was originally created by the laboratory of Thomas Graf (CGR, Barcelona) in Rapino et al., 2013, Cell Reports from the parental B cell precursor leukemia (RCH-ACV, ACC 548) cell line. The cell line is also available commercially from Sigma-Aldrich (SCC165). The BLaER1-CTCF-mAID cell line was a gift from Grégoire Stik (CRG, Barcelona), and was created from the parental BLaER1 cell line in Stik et al., 2020, Nature Genetics.

### Authentication

The BLaER1 cells were authenticated using the KaryoStat+ assay (Thermo Fisher). The BLaER1-CTCF-mAID cell line was created from the authenticated BLaER1 line and not further authenticated.

### Mycoplasma contamination

All cell lines tested negative for mycoplasma contamination.

### Commonly misidentified lines (See [ICLAC](#) register)

No commonly misidentified lines were used.

## Plants

Seed stocks

n/a

Novel plant genotypes

n/a

Authentication

n/a

## ChIP-seq

### Data deposition

- ☒ Confirm that both raw and final processed data have been deposited in a public database such as [GEO](#).
- ☒ Confirm that you have deposited or provided access to graph files (e.g. BED files) for the called peaks.

Data access links

*May remain private before publication.*GEO link: <https://www.ncbi.nlm.nih.gov/geo/query/acc.cgi?acc=GSE263641>

Reviewer token: wxmfyuqqhrcptsh

Files in database submission

GSM8195732 BLaER, SMC1A\_ChIP\_0h\_rep1  
 GSM8195733 BLaER, SMC1A\_ChIP\_0h\_rep2  
 GSM8195734 BLaER, SMC1A\_ChIP\_0h\_rep3  
 GSM8195735 BLaER, SMC1A\_ChIP\_12h\_rep1  
 GSM8195736 BLaER, SMC1A\_ChIP\_12h\_rep2  
 GSM8195737 BLaER, SMC1A\_ChIP\_12h\_rep3  
 GSM8195738 BLaER, SMC1A\_ChIP\_24h\_rep1  
 GSM8195739 BLaER, SMC1A\_ChIP\_24h\_rep2  
 GSM8195740 BLaER, SMC1A\_ChIP\_24h\_rep3  
 GSM8195741 BLaER, SMC1A\_ChIP\_72h\_rep1  
 GSM8195742 BLaER, SMC1A\_ChIP\_72h\_rep2  
 GSM8195743 BLaER, SMC1A\_ChIP\_72h\_rep3  
 GSM8195744 BLaER, SMC1A\_ChIP\_96h\_rep1  
 GSM8195745 BLaER, SMC1A\_ChIP\_96h\_rep2  
 GSM8195746 BLaER, SMC1A\_ChIP\_96h\_rep3  
 GSM8195747 BLaER, MED26\_ChIP\_0h\_rep1  
 GSM8195748 BLaER, MED26\_ChIP\_0h\_rep2  
 GSM8195749 BLaER, MED26\_ChIP\_0h\_rep3  
 GSM8195750 BLaER, MED26\_ChIP\_12h\_rep1  
 GSM8195751 BLaER, MED26\_ChIP\_12h\_rep2  
 GSM8195752 BLaER, MED26\_ChIP\_12h\_rep3  
 GSM8195753 BLaER, MED26\_ChIP\_24h\_rep1  
 GSM8195754 BLaER, MED26\_ChIP\_24h\_rep2  
 GSM8195755 BLaER, MED26\_ChIP\_24h\_rep3  
 GSM8195762 BLaER subclone CTCF-AID, CTCF\_ChIP\_96h\_control\_rep1  
 GSM8195763 BLaER subclone CTCF-AID, CTCF\_ChIP\_96h\_control\_rep2  
 GSM8195764 BLaER subclone CTCF-AID, CTCF\_ChIP\_96h\_depl\_rep1  
 GSM8195765 BLaER subclone CTCF-AID, CTCF\_ChIP\_96h\_depl\_rep2  
 GSM8195756 BLaER, MED26\_ChIP\_72h\_rep1  
 GSM8195757 BLaER, MED26\_ChIP\_72h\_rep2  
 GSM8195758 BLaER, MED26\_ChIP\_72h\_rep3  
 GSM8195759 BLaER, MED26\_ChIP\_96h\_rep1  
 GSM8195760 BLaER, MED26\_ChIP\_96h\_rep2  
 GSM8195761 BLaER, MED26\_ChIP\_96h\_rep3  
 GSM8740797 BLaER subclone CTCF-AID, SMC1A\_ChIP\_96h\_control\_rep1  
 GSM8740798 BLaER subclone CTCF-AID, SMC1A\_ChIP\_96h\_control\_rep2  
 GSM8740799 BLaER subclone CTCF-AID, SMC1A\_ChIP\_96h\_depl\_rep1  
 GSM8740800 BLaER subclone CTCF-AID, SMC1A\_ChIP\_96h\_depl\_rep2  
 GSM8740801 BLaER subclone CTCF-AID, MED26\_ChIP\_96h\_control\_rep1  
 GSM8740802 BLaER subclone CTCF-AID, MED26\_ChIP\_96h\_control\_rep2  
 GSM8740803 BLaER subclone CTCF-AID, MED26\_ChIP\_96h\_depl\_rep1  
 GSM8740804 BLaER subclone CTCF-AID, MED26\_ChIP\_96h\_depl\_rep2

Genome browser session

(e.g. [UCSC](#))[https://genome-euro.ucsc.edu/cgi-bin/hgTracks?](https://genome-euro.ucsc.edu/cgi-bin/hgTracks?db=hg38&lastVirtModeType=default&lastVirtModeExtraState=&virtModeType=default&virtMode=0&nonVirtPosition=&position=chr6%3A133824244%2D136599852&hgsid=348343346_rZSyfdVVteG8voU2PaaW4P2jFgAO)
[db=hg38&lastVirtModeType=default&lastVirtModeExtraState=&virtModeType=default&virtMode=0&nonVirtPosition=&position=chr6%3A133824244%2D136599852&hgsid=348343346\\_rZSyfdVVteG8voU2PaaW4P2jFgAO](https://genome-euro.ucsc.edu/cgi-bin/hgTracks?db=hg38&lastVirtModeType=default&lastVirtModeExtraState=&virtModeType=default&virtMode=0&nonVirtPosition=&position=chr6%3A133824244%2D136599852&hgsid=348343346_rZSyfdVVteG8voU2PaaW4P2jFgAO)

## Methodology

|                         |                                                                                                                                                                                                                                                                                                                                |
|-------------------------|--------------------------------------------------------------------------------------------------------------------------------------------------------------------------------------------------------------------------------------------------------------------------------------------------------------------------------|
| Replicates              | ChIPmentation experiments for MED26 and SMC1A were performed in 3 biological replicates per condition; ChIPmentation experiments for CTCF were performed in 2 biological replicates per condition; ChIPmentation experiments for MED26 and SMC1A after CTCF depletion were performed in 2 biological replicates per condition. |
| Sequencing depth        | The samples were sequenced using the NextSeq550 Illumina platform (75-bp paired-end reads) to a sequencing depth of ~20 M reads per sample.                                                                                                                                                                                    |
| Antibodies              | ChIPmentation: Rabbit anti-CTCF (2 µg, Diagenode, C15410210-50), Rabbit anti-SMC1A (2 µg, Abcam, ab9262), Rabbit anti-MED26 (2 µg, Bethyl Laboratories, A302-370), Drosophila spike-in antibody (1 µg, Biozol, 61686).                                                                                                         |
| Peak calling parameters | Paired-end reads were processed for adapter removal and duplicate filtering and mapped to the hg38 reference genome using Bowtie2. Peak calling was performed with MACS2 (consensus peaks with parameter q = 0.1 were selected). All peak profiles were generated using DeepTools.                                             |
| Data quality            | The quality of the data was assessed by comparing CTCF-control samples to available CTCF ChIP-seq data (Stik, et al., 2020, Nature Genetics). As SMC1A and MED26 ChIPmentation experiments have been performed for the first time in this cell line, data quality was assessed by comparing 3 biological replicates.           |
| Software                | Paired-end reads were processed for adapter removal and duplicate filtering and mapped to the hg38 reference genome using Bowtie2. Peak calling was performed with MACS2. All peak profiles were generated using DeepTools.                                                                                                    |

## Flow Cytometry

### Plots

Confirm that:

- ☒ The axis labels state the marker and fluorochrome used (e.g. CD4-FITC).
- ☐ The axis scales are clearly visible. Include numbers along axes only for bottom left plot of group (a 'group' is an analysis of identical markers).
- ☒ All plots are contour plots with outliers or pseudocolor plots.
- ☒ A numerical value for number of cells or percentage (with statistics) is provided.

## Methodology

|                           |                                                                                                                                                                                                                                                                                                                                                                                                                                                                                                                                                                                                                                                                      |
|---------------------------|----------------------------------------------------------------------------------------------------------------------------------------------------------------------------------------------------------------------------------------------------------------------------------------------------------------------------------------------------------------------------------------------------------------------------------------------------------------------------------------------------------------------------------------------------------------------------------------------------------------------------------------------------------------------|
| Sample preparation        | The BLAER1 cells were cultured and differentiated and flow cytometry analysis was performed at different differentiation stages for 2 biological replicates. Cells were harvested, washed with PBS, blocked with human Fc Receptor Binding Antibody, stained with antibodies, washed with PBS and analyzed. A more detailed protocol is described in the Methods section.                                                                                                                                                                                                                                                                                            |
| Instrument                | Sony SH800 Cell Sorter (MPI-NAT, Goettingen).                                                                                                                                                                                                                                                                                                                                                                                                                                                                                                                                                                                                                        |
| Software                  | FloJo v.10.8.1                                                                                                                                                                                                                                                                                                                                                                                                                                                                                                                                                                                                                                                       |
| Cell population abundance | Cells were analyzed for the expression of the cell surface markers CD19 (B cell marker) and CD11b (iMacS marker). All the BLAER1 cells were positive for CD19 and after 7 days of transdifferentiation around 90 % of the cells lost the CD19 marker and acquired the CD11b marker.                                                                                                                                                                                                                                                                                                                                                                                  |
| Gating strategy           | Initial gating was performed based on forward and side scatters to identify single cells and exclude cell debris. Firstly, a gate was set on forward scatter height (FSC-H) vs forward scatter area (FSC-A) plot to exclude doublets. Secondly, a gate was set on side scatter height (SSC-H) vs forward scatter area (FSC-A) plot to exclude debris cells. Thirdly, a gate was set on the histogram to include only GFP positive, alive cells. Quadrant gates were based on non-differentiated B-cell population as negative control. They were set on 0 h sample, which is CD19 positive and CD11b negative. All relevant data are shown in Extended Data Fig. 1b. |

- ☒ Tick this box to confirm that a figure exemplifying the gating strategy is provided in the Supplementary Information.
