# Supplementary material for: CTCF depletion decouples enhancer-mediated gene activation from chromatin hub formation
Source: Nat Struct Mol Biol. 2025 May 13;32(7):1268–81. doi: 10.1038/s41594-025-01555-z (PMC12263429; doi:10.1038/s41594-025-01555-z)
Supplement: Supplementary file 3 — Supplementary Tables 1–3. [file 41594_2025_1555_MOESM3_ESM.xlsx]

## Sheet: Supplementary Table 1-MCC_bCBS
Supplementary Table 1. Coordinates of capture oligonucleotides used in MCC, Tri-C, and Capture-C experiments.
viewpoint	oligo_chr	oligo_start	oligo_end
ARL4C	chr2	234135801	234135921
ATP8B4	chr15	50145483	50145603
BCL11A	chr2	60674664	60674784
BCL2	chr18	63016373	63016493
BLK	chr8	11413826	11413946
CCL2	chr17	34361583	34361703
CCR1	chr3	46378486	46378606
CD14	chr5	140635117	140635237
CD163	chr12	7219771	7219891
CD38	chr4	15730050	15730170
CD93	chr20	22691751	22691871
CEBPa	chr19	33406935	33407055
CITED2	chr6	140441420	140441540
CREG1	chr1	167688027	167688147
DDIT4	chr10	72340543	72340663
DNTT	chr10	96229685	96229805
EBF1	chr5	158165796	158165916
EPS8	chr12	15590474	15590594
FOSL2	chr2	28452598	28452718
FRAT2	chr10	97081749	97081869
GAS7	chr17	9965738	9965858
HCK	chr20	32661961	32662081
IGLL1	chr22	23849637	23849757
IGLL5	chr22	22956031	22956151
IL10RA	chr11	118053513	118053633
IL7R	chr5	35089810	35089930
IRF8	chr16	86016504	86016624
ITGAX	chr16	31451857	31451977
KDM7A	chr7	140326380	140326500
KLF4	chr9	107465695	107465815
KLF6	chr10	4767177	4767297
LMO2	chr11	33857977	33858097
LRMP	chr12	25119134	25119254
LYN	chr8	55815204	55815324
MAFB	chr20	40160212	40160332
MPEG	chr11	59430056	59430176
MXD1	chr2	69724767	69724887
MYB	chr6	135423787	135423907
NFKBIZ	chr3	102225538	102225658
PAX5	chr9	37309145	37309265
PELI1	chr2	64330993	64331113
PTPRC	chr1	198699551	198699671
RAG2	chr11	36564510	36564630
RBM47	chr4	40719167	40719287
RBPJ	chr4	26028856	26028976
RORB	chr9	74309707	74309827
SRGN	chr10	69004932	69005052
TNFRSF1B	chr1	12118735	12118855
TNFSF10	chr3	172596229	172596349
TRIB1	chr8	125644674	125644794
TRPS1	chr8	115410004	115410124

## Sheet: Supplementary Table 1-MCC_ppCBS
Supplementary Table 1. Coordinates of capture oligonucleotides used in MCC, Tri-C, and Capture-C experiments.
viewpoint	oligo_chr	oligo_start	oligo_end
ARL4C	chr2	234500555	234500675
ATP8B4	chr15	50128371	50128491
BCL11A	chr2	60550446	60550566
BCL2	chr18	63323134	63323254
BLK	chr8	11482209	11482329
CCR1	chr3	46214790	46214910
CD14	chr5	140639243	140639363
CD38	chr4	15779453	15779573
CD93	chr20	23087971	23088091
CEBPa	chr19	33311434	33311554
CITED2	chr6	139373370	139373490
CREG1	chr1	167556226	167556346
DDIT4	chr10	72274869	72274989
DNTT	chr10	96293394	96293514
EBF1	chr5	159104067	159104187
EPS8	chr12	15772558	15772678
FOSL2	chr2	28396886	28397006
FRAT2	chr10	97333475	97333595
GAS7	chr17	10226973	10227093
HCK	chr20	32035204	32035324
IGLL1	chr22	23591229	23591349
IGLL5	chr22	22884068	22884188
IL10RA	chr11	117950449	117950569
IL7R	chr5	35852191	35852311
IRF8	chr16	85897509	85897629
ITGAX	chr16	31357995	31358115
KDM7A	chr7	140175260	140175380
KLF4	chr9	107487637	107487757
KLF6	chr10	3781539	3781659
LMO2	chr11	33863559	33863679
LYN	chr8	55880556	55880676
MAFB	chr20	40690117	40690237
MPEG	chr11	59208084	59208204
MYB	chr6	135183068	135183188
NFKBIZ	chr3	101849842	101849962
PAX5	chr9	37029437	37029557
RAG2	chr11	36583811	36583931
RBPJ	chr4	26319687	26319807
RORB	chr9	74500202	74500322
SRGN	chr10	69093414	69093534
TNFRSF1B	chr1	12164353	12164473
TRIB1	chr8	125432132	125432252
TRPS1	chr8	115658395	115658515

## Sheet: Supplementary Table 1-MCC_prom
Supplementary Table 1. Coordinates of capture oligonucleotides used in MCC, Tri-C, and Capture-C experiments.
viewpoint	oligo_chr	oligo_start	oligo_end
ARL4C	chr2	234497302	234497422
ATP8B4	chr15	50119265	50119385
BCL11A	chr2	60553568	60553688
BCL2	chr18	63320120	63320240
BLK	chr8	11494337	11494457
CCL2	chr17	34255149	34255269
CCR1	chr3	46208460	46208580
CD14	chr5	140633333	140633453
CD163	chr12	7503810	7503930
CD38	chr4	15778396	15778516
CD93	chr20	23086321	23086441
CEBPa	chr19	33302623	33302743
CITED2	chr6	139374495	139374615
CREG1	chr1	167553729	167553849
DDIT4	chr10	72273817	72273937
DNTT	chr10	96304316	96304436
EBF1	chr5	159100322	159100442
EPS8	chr12	15789325	15789445
FOSL2	chr2	28392730	28392850
FRAT2	chr10	97334851	97334971
GAS7	chr17	10198762	10198882
HCK	chr20	32051341	32051461
IGLL1	chr22	23580538	23580658
IGLL5	chr22	22887641	22887761
IL10RA	chr11	117986246	117986366
IL7R	chr5	35856768	35856888
IRF8	chr16	85899038	85899158
ITGAX	chr16	31355032	31355152
KDM7A	chr7	140177128	140177248
KLF4	chr9	107489716	107489836
KLF6	chr10	3785368	3785488
LMO2	chr11	33869862	33869982
LRMP	chr12	25052526	25052646
LYN	chr8	55879714	55879834
MAFB	chr20	40689181	40689301
MPEG	chr11	59212893	59213013
MXD1	chr2	69914838	69914958
MYB	chr6	135181221	135181341
NFKBIZ	chr3	101849331	101849451
PAX5	chr9	37027742	37027862
PELI1	chr2	64144478	64144598
PTPRC	chr1	198638983	198639103
RAG2	chr11	36598188	36598308
RBM47	chr4	40629907	40630027
RBPJ	chr4	26320829	26320949
RORB	chr9	74497219	74497339
SRGN	chr10	69088010	69088130
TNFRSF1B	chr1	12166911	12167031
TNFSF10	chr3	172523432	172523552
TRIB1	chr8	125430018	125430138
TRPS1	chr8	115668943	115669063

## Sheet: Supplementary Table 1-Tri-C_CBS
Supplementary Table 1. Coordinates of capture oligonucleotides used in MCC, Tri-C, and Capture-C experiments.
viewpoint	oligo_chr	oligo_start	oligo_end
ARL4C	chr2	234136124	234136244
ATP8B4	chr15	50145523	50145643
BCL11A	chr2	60565934	60566054
BCL2	chr18	63016310	63016430
BLK	chr8	11413945	11414065
CCL2	chr17	34361314	34361434
CCR1	chr3	46378307	46378427
CD14	chr5	140635084	140635204
CD163	chr12	7219565	7219685
CD38	chr4	15730243	15730363
CD93	chr20	22692137	22692257
CEBPa	chr19	33406815	33406935
CITED2	chr6	140441465	140441585
CREG1	chr1	167688341	167688461
DDIT4	chr10	72340652	72340772
DNTT	chr10	96340415	96340535
EBF1	chr5	158165690	158165838
EPS8	chr12	15590587	15590707
FOSL2	chr2	28452774	28452894
FRAT2	chr10	97081506	97081626
GAS7	chr17	9965726	9965846
HCK	chr20	32661788	32661908
IGLL1	chr22	23862397	23862517
IGLL5	chr22	22956144	22956264
IL10RA	chr11	118053355	118053475
IL7R	chr5	35089496	35089616
IRF8	chr16	86016674	86016794
ITGAX	chr16	31460982	31461102
KDM7A	chr7	140326698	140326818
KLF4	chr9	107481126	107481246
KLF6	chr10	4657008	4657128
LMO2	chr11	33857913	33858033
LRMP	chr12	25119269	25119389
LYN	chr8	55815124	55815244
MAFB	chr20	40160226	40160346
MPEG	chr11	59430056	59430176
MXD1	chr2	69912263	69912383
MYB	chr6	135424013	135424133
NFKBIZ	chr3	102225379	102225499
PAX5	chr9	37309141	37309261
PELI1	chr2	64330769	64330889
PTPRC	chr1	198700441	198700561
RAG2	chr11	36564654	36564774
RBM47	chr4	40284081	40284201
RBPJ	chr4	25842438	25842558
RORB	chr9	74309550	74309670
SRGN	chr10	69006990	69007110
TNFRSF1B	chr1	12118588	12118708
TNFSF10	chr3	172595759	172595879
TRIB1	chr8	125644623	125644743
TRPS1	chr8	115409740	115409860

## Sheet: Supplementary Table 1-Tri-C_enh
Supplementary Table 1. Coordinates of capture oligonucleotides used in MCC, Tri-C, and Capture-C experiments.
viewpoint	oligo_chr	oligo_start	oligo_end
ARL4C	chr2	234164404	234164524
ATP8B4	chr15	50058453	50058573
BCL11A	chr2	60100292	60100412
BCL2	chr18	63099849	63099969
BLK	chr8	11537834	11537954
CCL2	chr17	34221054	34221174
CCR1	chr3	46089531	46089651
CD14	chr5	140611747	140611867
CD163	chr12	7542742	7542862
CD38	chr4	15401325	15401445
CD93	chr20	23148156	23148276
CEBPa	chr19	33332524	33332644
CITED2	chr6	139839552	139839672
CREG1	chr1	167628010	167628130
DDIT4	chr10	72319302	72319422
DNTT	chr10	96236029	96236149
EBF1	chr5	158511643	158511763
EPS8	chr12	15726085	15726205
FOSL2	chr2	27955733	27955853
FRAT2	chr10	97278409	97278529
GAS7	chr17	10063878	10063998
HCK	chr20	32069191	32069311
IGLL1	chr22	23752209	23752329
IGLL5	chr22	22932043	22932163
IL10RA	chr11	117959610	117959730
IL7R	chr5	35908696	35908816
IRF8	chr16	85853642	85853762
ITGAX	chr16	31301907	31302027
KDM7A	chr7	140253145	140253265
KLF4	chr9	107750238	107750358
KLF6	chr10	4131562	4131682
LMO2	chr11	33930176	33930296
LRMP	chr12	24998219	24998339
LYN	chr8	55939671	55939791
MAFB	chr20	40498072	40498192
MPEG	chr11	59247640	59247760
MXD1	chr2	70043658	70043778
MYB	chr6	135114520	135114640
NFKBIZ	chr3	101937269	101937389
PAX5	chr9	37145024	37145144
PELI1	chr2	64273680	64273800
PTPRC	chr1	198543865	198543985
RAG2	chr11	36619437	36619557
RBM47	chr4	40577160	40577280
RBPJ	chr4	26074931	26075051
RORB	chr9	74333884	74334004
SRGN	chr10	69061467	69061587
TNFRSF1B	chr1	12144279	12144399
TNFSF10	chr3	172558977	172559097
TRIB1	chr8	125220123	125220243
TRPS1	chr8	115846506	115846626

## Sheet: Supplementary Table 1-CC_prom1
Supplementary Table 1. Coordinates of capture oligonucleotides used in MCC, Tri-C, and Capture-C experiments.
viewpoint	oligo_chr	oligo_start	oligo_end
ARHGAP22	chr10	48655667	48655737
ARHGAP22	chr10	48656759	48656829
ARL4C	chr2	234498078	234498148
ARL4C	chr2	234496583	234496653
ATP8B4-p2-r2	chr15	50113190	50113260
ATP8B4-p2-r2	chr15	50113138	50113208
ATP8B4	chr15	50119204	50119274
ATP8B4	chr15	50120078	50120148
BCL11A	chr2	60553739	60553809
BCL11A	chr2	60555342	60555412
BCL7A	chr12	122022024	122022094
BCL7A	chr12	122021625	122021695
BLNK-r1	chr10	96271475	96271545
BLNK-r1	chr10	96271532	96271602
C/EBPa	chr19	33302591	33302661
C/EBPa	chr19	33302436	33302506
C/EBPb	chr20	50190966	50191036
CCR1	chr3	46208412	46208482
CCR1	chr3	46208216	46208286
CD14	chr5	140633578	140633648
CD14	chr5	140633068	140633138
CD163	chr12	7503989	7504059
CD163	chr12	7503899	7503969
CD19	chr16	28931854	28931924
CD300E	chr17	74623618	74623688
CD300E	chr17	74623845	74623915
CD300LF	chr17	74712719	74712789
CD300LF	chr17	74712921	74712991
CD38	chr4	15779173	15779243
CD38	chr4	15778043	15778113
CD79A	chr19	41877763	41877833
CD79A	chr19	41876977	41877047
CITED2	chr6	139373920	139373990
CITED2	chr6	139375938	139376008
CREG1	chr1	167554081	167554151
CREG1	chr1	167553738	167553808
CSFR1_(CSF1R)	chr5	150086424	150086494
CSFR1_(CSF1R)	chr5	150086714	150086784
DDIT4	chr10	72273327	72273397
DDIT4	chr10	72274149	72274219
DNTT	chr10	96304430	96304500
DNTT	chr10	96304176	96304246
DTL	chr1	212035989	212036059
DTL	chr1	212035558	212035628
EPS8	chr12	15788870	15788940
EPS8	chr12	15789366	15789436
FCGR1B	chr1	121087454	121087524
FCGR1B	chr1	121087393	121087463
FGL2	chr7	77200208	77200278
FGL2	chr7	77199327	77199397
FOSL2-r2	chr2	28392808	28392878
FOSL2-r2	chr2	28393653	28393723
FRAT1	chr10	97319386	97319456
FRAT1	chr10	97318894	97318964
FRAT2	chr10	97335540	97335610
FRAT2	chr10	97334569	97334639
HPS4	chr22	26484070	26484140
HPS4	chr22	26483342	26483412
IGJ_(JCHAIN)	chr4	70666828	70666898
IGJ_(JCHAIN)	chr4	70666432	70666502
IGLL1-r2	chr22	23580490	23580560
IGLL1-r2	chr22	23580357	23580427
IGLL5	chr22	22887809	22887879
IL12RB2	chr1	67307108	67307178
IL7R	chr5	35856749	35856819
IQGAP1	chr15	90387786	90387856
IQGAP1	chr15	90388274	90388344
IRF2BPL	chr14	77027789	77027859
IRF2BPL	chr14	77028690	77028760
IRF8	chr16	85898198	85898268
ITGAM_(MAC-1/CD11b)	chr16	31259997	31260067
ITGAX	chr16	31354483	31354553
ITGAX	chr16	31355066	31355136
JUNB	chr19	12791250	12791320
JUNB	chr19	12792490	12792560
KCNK13	chr14	90061269	90061339
KCNK13	chr14	90062009	90062079
KDM7A	chr7	140176781	140176851
KLF4-r2	chr9	107489767	107489837
LEF1	chr4	108170412	108170482
LEF1	chr4	108165892	108165962
LILRA5	chr19	54313318	54313388
LILRA5	chr19	54313186	54313256
LMO2-p2	chr11	33892357	33892427
LMO2-p2	chr11	33891421	33891491
LMO2	chr11	33870649	33870719
LMO2	chr11	33868714	33868784
LRMP_(IRAG2)	chr12	25052570	25052640
LTBR	chr12	6384117	6384187
LTBR	chr12	6383812	6383882
LYZ	chr12	69348341	69348411
MAFB	chr20	40688829	40688899
MMP9	chr20	46008692	46008762
MMP9	chr20	46008218	46008288
MPEG1-r2	chr11	59212967	59213037
MPEG1-r2	chr11	59213022	59213092
MYB	chr6	135181446	135181516
MYB	chr6	135180564	135180634
MYC-r2	chr8	127735790	127735860
MYC-r2	chr8	127735407	127735477
NFKBIZ	chr3	101848814	101848884
NFKBIZ	chr3	101849561	101849631
PELI1	chr2	64142864	64142934
PELI1	chr2	64144541	64144611
PHACTR3	chr20	59577866	59577936
PRKCH	chr14	61320936	61321006
PRKCH	chr14	61322034	61322104
PU.1_(SPI1)	chr11	47378622	47378692
RAG2	chr11	36597727	36597797
RBM47-p2	chr4	40630129	40630199
RBPJ-p2	chr4	26320386	26320456
RBPJ-p2	chr4	26320689	26320759
RORB	chr9	74496779	74496849
RORB	chr9	74497362	74497432
SERPINA1	chr14	94390750	94390820
SERPINA1	chr14	94390659	94390729
SLAMF1	chr1	160646959	160647029
SLAMF1	chr1	160646833	160646903
SRGN	chr10	69088090	69088160
TLE1	chr9	81690849	81690919
TLE1	chr9	81687876	81687946
TLR7	chrX	12866976	12867046
TLR7	chrX	12867041	12867111
TRPS1	chr8	115669709	115669779
TRPS1	chr8	115668607	115668677
VPRE1	chr22	22244735	22244805
VPRE1	chr22	22244347	22244417
VSIG4	chrX	66040104	66040174
VSIG4	chrX	66039479	66039549

## Sheet: Supplementary Table 1-CC_prom2
Supplementary Table 1. Coordinates of capture oligonucleotides used in MCC, Tri-C, and Capture-C experiments.
viewpoint	oligo_chr	oligo_start	oligo_end
BCL2	chr18	63319546	63319616
BCL2	chr18	63320283	63320353
BLK	chr8	11494245	11494315
BLK	chr8	11494370	11494440
CCL2	chr17	34255197	34255267
CCL2	chr17	34255282	34255352
CD48	chr1	160711934	160712004
CD48	chr1	160711760	160711830
CD93	chr20	23086517	23086587
CD93	chr20	23086177	23086247
EBF1	chr5	159099044	159099114
EBF1	chr5	159099340	159099410
FCGR1A	chr1	149782803	149782873
FCGR1A	chr1	149782742	149782812
FPR1	chr19	51752003	51752073
GAS7	chr17	10199369	10199439
GAS7	chr17	10198387	10198457
HCK	chr20	32052986	32053056
HCK	chr20	32051369	32051439
IFNGR2	chr21	33402661	33402731
IFNGR2	chr21	33403387	33403457
IGHM	chr14	105856315	105856385
IGHM	chr14	105855981	105856051
IL10RA	chr11	117986047	117986117
IRF1	chr5	132491811	132491881
IRF1	chr5	132489726	132489796
KLF6	chr10	3785111	3785181
KLF6	chr10	3786134	3786204
LILRA6	chr19	54242859	54242929
LILRA6	chr19	54243070	54243140
LYN	chr8	55880791	55880861
LYN	chr8	55879202	55879272
MS4A1	chr11	60456146	60456216
MS4A1	chr11	60455654	60455724
MS4A6A	chr11	60183242	60183312
MXD1	chr2	69914167	69914237
MXD1	chr2	69916062	69916132
PAX5	chr9	37026536	37026606
PAX5	chr9	37028994	37029064
PTPRC	chr1	198639166	198639236
PTPRC	chr1	198639059	198639129
SOCS3	chr17	78360768	78360838
SOCS3	chr17	78359092	78359162
TASL	chrX	30577003	30577073
TASL	chrX	30577740	30577810
TNFRSF1B	chr1	12167024	12167094
TNFSF10	chr3	172523578	172523648
TNFSF10	chr3	172523381	172523451
TRIB1	chr8	125429114	125429184
TRIB1	chr8	125430862	125430932

## Sheet: Supplementary Table 2
Supplementary Table 2. Statistical analysis of RNA-seq data in auxin- and control-treated BLaER1-CTCF-mAID cells.
gene	baseMean	log2FoldChange	lfcSE	stat	pvalue	padj	transdifferentation
GPRIN3	1535.36	1.72766	0.0733389	23.5572	1.05936e-122	1.59053e-118	stable genes
EGR1	1038.66	2.97813	0.128387	23.1965	4.94431e-119	3.71169e-115	B-cell genes
SPTLC2	1979.47	1.37077	0.0655595	20.9088	4.4555e-97	2.22983e-93	iMac genes
HIST1H1B	7971.69	-0.892101	0.0446755	-19.9685	1.03587e-88	3.88815e-85	B-cell genes
DDIT4	1703.21	-1.49377	0.0762219	-19.5976	1.62154e-85	4.86915e-82	iMac genes
HIST1H3B	3762.44	-1.06374	0.0557449	-19.0823	3.5418e-81	8.86277e-78	B-cell genes
ABLIM1	347.866	3.3769	0.179069	18.8581	2.52181e-79	5.40891e-76	B-cell genes
CYBB	6624.46	-0.91553	0.049526	-18.4859	2.68428e-76	5.03771e-73	iMac genes
AHI1	689.078	1.95935	0.109895	17.8293	4.18746e-71	6.98562e-68	B-cell genes
HIST1H2AG	2899.98	-1.11355	0.0634428	-17.5521	5.73501e-69	8.61055e-66	B-cell genes
BCAT1	6790.65	-0.901248	0.0524301	-17.1895	3.18152e-66	4.34248e-63	B-cell genes
STAG1	1952.01	1.15933	0.0684359	16.9404	2.26406e-64	2.83272e-61	stable genes
PLK2	677.498	1.95009	0.115174	16.9317	2.62753e-64	3.0346e-61	stable genes
HIST1H2AI	2227.96	-1.1324	0.0681693	-16.6115	5.74919e-62	6.1656e-59	stable genes
FADS1	1904.7	-1.1761	0.07281	-16.153	1.08215e-58	1.08316e-55	stable genes
N4BP2	1325.71	-1.54953	0.0963948	-16.0748	3.83011e-58	3.59408e-55	stable genes
PRKCA	1165.07	-1.30635	0.0813458	-16.0592	4.92988e-58	4.35396e-55	iMac genes
APP	2368.34	-1.07871	0.0673655	-16.0127	1.04126e-57	8.68528e-55	stable genes
APBB2	1239.8	1.38856	0.0870427	15.9527	2.7302e-57	2.15744e-54	B-cell genes
HIST1H3G	1690.59	-1.32456	0.0832993	-15.9012	6.21227e-57	4.66355e-54	B-cell genes
CIZ1	978.29	-1.58599	0.0999073	-15.8746	9.49855e-57	6.79101e-54	stable genes
FAM198B	777.169	-1.55644	0.0981865	-15.8518	1.36504e-56	9.31578e-54	iMac genes
ZAK	1285.57	-1.26837	0.080355	-15.7846	3.97404e-56	2.59419e-53	stable genes
HIST1H2AJ	2055.26	-1.141	0.072601	-15.7161	1.17354e-55	7.34149e-53	B-cell genes
OLFML2A	240.64	2.96831	0.189844	15.6355	4.17184e-55	2.50544e-52	iMac genes
HIST1H2BI	1672.68	-1.30291	0.0838895	-15.5312	2.13328e-54	1.23189e-51	B-cell genes
MKI67	9160.94	-0.692745	0.0448025	-15.4622	6.24503e-54	3.34867e-51	stable genes
CD22	1152.58	1.48576	0.0960788	15.464	6.06908e-54	3.34867e-51	B-cell genes
PAPSS1	1001.69	1.37188	0.0888716	15.4367	9.27912e-54	4.80403e-51	stable genes
KCNQ1OT1	5375.86	-0.874441	0.0569585	-15.3522	3.42188e-53	1.71254e-50	stable genes
MYO15B	2829.92	-0.884449	0.0583793	-15.15	7.57091e-52	3.66676e-49	iMac genes
IGSF3	2046.9	1.03312	0.0682457	15.1383	9.05762e-52	4.24972e-49	iMac genes
NBPF12	628.817	1.81227	0.120265	15.069	2.58966e-51	1.17822e-48	iMac genes
HIST1H2AL	1475.9	-1.31242	0.0874732	-15.0036	6.94937e-51	3.06876e-48	B-cell genes
GAB2	2126.4	-0.958242	0.0639633	-14.9811	9.75577e-51	4.18495e-48	iMac genes
CAPRIN1	7620.36	0.641287	0.0428859	14.9533	1.48178e-50	6.17984e-48	stable genes
TRIB2	1693.39	1.22622	0.0820986	14.936	1.92293e-50	7.80292e-48	B-cell genes
HIST1H2BF	2330.84	-1.02268	0.0688763	-14.8481	7.15361e-50	2.82643e-47	B-cell genes
SPIDR	1990.42	0.975864	0.0658562	14.8181	1.11888e-49	4.3074e-47	iMac genes
TMCO6	720.31	1.5404	0.10422	14.7803	1.96339e-49	7.36958e-47	iMac genes
ITGAM	1515.64	1.16528	0.0793101	14.6927	7.18039e-49	2.62942e-46	iMac genes
IRF8	1939.02	-1.0442	0.0713156	-14.642	1.51489e-48	5.41535e-46	iMac genes
HIST1H2BO	1551.46	-1.28344	0.0880304	-14.5795	3.79342e-48	1.32452e-45	B-cell genes
HIST1H2BM	1676.34	-1.32644	0.0911039	-14.5597	5.06789e-48	1.7293e-45	B-cell genes
SULF2	592.456	-1.64158	0.11284	-14.5479	6.0267e-48	2.01077e-45	iMac genes
HIST1H2BJ	1381.82	-1.31849	0.0906842	-14.5393	6.82701e-48	2.22828e-45	B-cell genes
GPCPD1	2607.65	0.93751	0.0646299	14.5058	1.11293e-47	3.55523e-45	iMac genes
E2F2	1593.04	-1.22487	0.0844869	-14.4978	1.25164e-47	3.91502e-45	B-cell genes
ABCA2	1525.43	1.03816	0.0717454	14.4701	1.87231e-47	5.7369e-45	iMac genes
BHLHE40	976.844	-1.30631	0.0903612	-14.4565	2.28028e-47	6.84721e-45	iMac genes
HIST1H3I	2181.51	-1.10143	0.0767996	-14.3416	1.20302e-46	3.54159e-44	B-cell genes
ANKRD36C	682.195	-1.7653	0.123518	-14.2918	2.46052e-46	7.10429e-44	stable genes
HIST1H2BK	3265.68	-0.874368	0.0613154	-14.2602	3.87596e-46	1.09799e-43	stable genes
HIST1H1C	5058.61	-0.733756	0.0514825	-14.2525	4.32253e-46	1.20182e-43	B-cell genes
SLC25A37	3053.95	-0.807158	0.0567344	-14.227	6.23368e-46	1.70168e-43	iMac genes
HIST1H2AM	2264.23	-0.940489	0.0664126	-14.1613	1.59016e-45	4.26334e-43	B-cell genes
SRGN	11670.1	-0.580067	0.0409833	-14.1538	1.77032e-45	4.66307e-43	iMac genes
ADRBK1	5065.73	-0.653859	0.0465006	-14.0613	6.56683e-45	1.6999e-42	iMac genes
CTSB	7677.38	-0.647572	0.0463175	-13.9812	2.03173e-44	5.17024e-42	iMac genes
HMGB2	4956.88	-0.753193	0.0539932	-13.9498	3.15585e-44	7.89698e-42	stable genes
TUBA1B	7969.75	-0.647704	0.0467443	-13.8563	1.16483e-43	2.86702e-41	B-cell genes
UHRF1	3036.46	-0.989962	0.0714693	-13.8516	1.24461e-43	3.01397e-41	B-cell genes
TOP2A	3439.14	-0.765518	0.055431	-13.8103	2.20958e-43	5.26583e-41	B-cell genes
UGT3A2	1008.7	-1.45392	0.105532	-13.7771	3.49848e-43	8.20722e-41	B-cell genes
SETBP1	357.667	-2.09559	0.153369	-13.6637	1.67235e-42	3.86286e-40	iMac genes
ZNF185	133.562	5.10817	0.374208	13.6506	2.00137e-42	4.55281e-40	stable genes
PPA2	479.501	-1.88328	0.138043	-13.6426	2.23297e-42	5.00385e-40	stable genes
HIST1H3H	1831.67	-1.05588	0.0774638	-13.6307	2.63136e-42	5.80989e-40	stable genes
ABCA5	210.723	2.88619	0.21256	13.5782	5.3911e-42	1.17307e-39	B-cell genes
ABCA1	5239.81	-0.673977	0.0498398	-13.5229	1.14613e-41	2.45829e-39	iMac genes
KIAA1147	1604.18	0.983944	0.0729508	13.4878	1.84607e-41	3.90378e-39	iMac genes
HIVEP1	695.905	-1.41453	0.105021	-13.469	2.38225e-41	4.96766e-39	iMac genes
HIST1H2BG	1578.55	-1.12444	0.083645	-13.4431	3.38147e-41	6.95471e-39	B-cell genes
HIST1H2AH	1449.12	-1.14727	0.0857153	-13.3847	7.43206e-41	1.5079e-38	B-cell genes
SLC44A1	1697.11	0.951837	0.0715859	13.2964	2.42762e-40	4.85977e-38	stable genes
ZFP36	1212.95	-1.05552	0.0800603	-13.1841	1.08337e-39	2.14023e-37	iMac genes
HIST1H2BL	1605.84	-1.1298	0.0857463	-13.1761	1.20456e-39	2.34874e-37	stable genes
HIST2H2BF	2400.56	-0.840853	0.0640503	-13.128	2.2757e-39	4.38044e-37	stable genes
PAG1	3441.16	-0.684826	0.0522333	-13.1109	2.85182e-39	5.41989e-37	iMac genes
HIST1H4E	3011.25	-0.788264	0.0602667	-13.0796	4.30807e-39	8.08517e-37	B-cell genes
JAK2	2801.99	0.803257	0.0614477	13.0722	4.74781e-39	8.80045e-37	iMac genes
BZRAP1	2898.1	-0.763887	0.0586867	-13.0164	9.87694e-39	1.80844e-36	iMac genes
LIPA	1188.33	-1.0624	0.0819482	-12.9644	1.94864e-38	3.52493e-36	iMac genes
MAPKBP1	454.075	1.84999	0.142752	12.9595	2.07639e-38	3.71131e-36	B-cell genes
RN7SL1	81231.2	-0.550252	0.042658	-12.8992	4.55028e-38	8.0374e-36	stable genes
PIM1	523.881	1.5101	0.117362	12.8671	6.89836e-38	1.20432e-35	iMac genes
HIST1H4H	2018.55	-0.943986	0.0733941	-12.8619	7.37531e-38	1.27279e-35	B-cell genes
PTCH1	913.279	-1.2525	0.0978635	-12.7984	1.67328e-37	2.85485e-35	stable genes
TMEM87B	912.74	1.32192	0.10335	12.7906	1.84933e-37	3.11976e-35	iMac genes
ADD2	440.871	-1.8316	0.143839	-12.7337	3.84029e-37	6.40645e-35	stable genes
MYCBP2	7039.64	0.562992	0.0449018	12.5383	4.60866e-36	7.60378e-34	stable genes
KIAA1279	236.72	2.48967	0.199514	12.4787	9.76262e-36	1.59322e-33	B-cell genes
HIST1H2BD	2812.23	-0.804003	0.064903	-12.3878	3.04396e-35	4.9142e-33	B-cell genes
HIST2H2BE	2936.09	-0.910645	0.0735985	-12.3731	3.65248e-35	5.83386e-33	stable genes
TMSB4X	7665.7	-0.694404	0.0562496	-12.3451	5.17938e-35	8.1856e-33	iMac genes
IL7R	6223.25	-0.864886	0.0706748	-12.2375	1.9589e-34	3.06363e-32	B-cell genes
JUNB	1165.34	-1.02337	0.0840773	-12.1717	4.39694e-34	6.80574e-32	iMac genes
CDC42EP3	3424.8	0.683475	0.0561891	12.1638	4.84319e-34	7.41997e-32	iMac genes
SLC7A5P2	609.095	1.35177	0.111203	12.1558	5.34146e-34	8.10067e-32	stable genes
ATP7B	276.639	2.08111	0.171267	12.1512	5.64958e-34	8.48227e-32	iMac genes
CENPF	2962.83	-0.806613	0.0664269	-12.1429	6.25876e-34	9.30386e-32	B-cell genes
MYLIP	969.556	-1.11504	0.0923703	-12.0714	1.49643e-33	2.20268e-31	iMac genes
COLEC12	1197.66	-0.948844	0.0793243	-11.9616	5.64797e-33	8.23287e-31	iMac genes
KLF10	1140.5	-1.08461	0.0913199	-11.8771	1.55728e-32	2.24817e-30	iMac genes
GJA1	992.111	1.74657	0.147841	11.8139	3.3103e-32	4.73342e-30	B-cell genes
HIST1H4I	979.495	-1.27791	0.108841	-11.7411	7.84914e-32	1.11176e-29	B-cell genes
FDFT1	2241.02	-0.747051	0.0636423	-11.7383	8.11284e-32	1.13838e-29	stable genes
SPRY2	494.779	1.70201	0.145369	11.7082	1.15669e-31	1.60801e-29	B-cell genes
SSBP2	830.159	1.21286	0.103733	11.6922	1.39794e-31	1.92557e-29	B-cell genes
AGRP	511.353	-1.43468	0.123428	-11.6236	3.1255e-31	4.26602e-29	iMac genes
EFCAB4B	684.29	-1.31826	0.114382	-11.525	9.8659e-31	1.33447e-28	stable genes
NAV1	2204.39	-0.864371	0.0750134	-11.5229	1.01158e-30	1.34942e-28	stable genes
MBNL3	2996.27	-0.657271	0.0570421	-11.5225	1.01561e-30	1.34942e-28	stable genes
HIST1H2BC	3193.32	-0.695615	0.0604984	-11.4981	1.34879e-30	1.77639e-28	B-cell genes
TANC2	575.295	1.32022	0.115158	11.4644	1.9903e-30	2.59847e-28	stable genes
CCDC6	958.872	-1.11374	0.0972325	-11.4545	2.23372e-30	2.89112e-28	stable genes
CXCR4	1846.64	-0.782471	0.0683227	-11.4526	2.28269e-30	2.92926e-28	iMac genes
COL9A2	314.676	1.78624	0.156667	11.4015	4.10973e-30	5.22911e-28	iMac genes
CCNA1	1718.16	-0.778522	0.0683804	-11.3852	4.95781e-30	6.25518e-28	iMac genes
SYNE2	1728.02	-0.869226	0.0767091	-11.3314	9.16788e-30	1.14705e-27	B-cell genes
OCRL	219.604	-2.34787	0.208784	-11.2455	2.43815e-29	3.02532e-27	stable genes
UNC119	440.498	1.4395	0.128739	11.1816	5.02052e-29	6.17853e-27	stable genes
SELL	239.963	-2.06683	0.185105	-11.1657	6.00048e-29	7.32449e-27	iMac genes
EPB41L2	1335.3	-0.959258	0.0860678	-11.1454	7.54175e-29	9.1316e-27	B-cell genes
FGFR1	738.068	1.28157	0.115169	11.1277	9.19978e-29	1.105e-26	B-cell genes
DOCK9	676.175	1.25754	0.113177	11.1113	1.10577e-28	1.31762e-26	iMac genes
TUBB	13146.3	-0.430486	0.0388872	-11.0701	1.75177e-28	2.07095e-26	B-cell genes
ERMP1	297.861	1.75675	0.159181	11.0362	2.55591e-28	2.998e-26	stable genes
ASPM	2742.38	-0.795428	0.0720862	-11.0344	2.60779e-28	3.03515e-26	stable genes
MCM7	3299.66	-0.666135	0.0603857	-11.0313	2.69808e-28	3.11608e-26	B-cell genes
PDCD4	1708.19	-0.760074	0.069066	-11.005	3.61367e-28	4.14165e-26	iMac genes
RGS2	408.515	1.4564	0.132552	10.9874	4.39451e-28	4.99842e-26	iMac genes
C12orf49	617.654	1.30907	0.119192	10.9828	4.62271e-28	5.17951e-26	B-cell genes
GSR	2231.05	0.711839	0.0648104	10.9834	4.59238e-28	5.17951e-26	stable genes
NSMCE4A	351.905	-1.83652	0.168211	-10.918	9.45605e-28	1.05165e-25	stable genes
ATAD2	3230.07	-0.642283	0.0591026	-10.8673	1.65085e-27	1.82249e-25	B-cell genes
PCDH9	1155.27	1.57875	0.145287	10.8664	1.66662e-27	1.82646e-25	B-cell genes
PLEKHA1	366.739	1.65608	0.152727	10.8434	2.14325e-27	2.3318e-25	iMac genes
PTMA	14293.9	-0.490036	0.0453886	-10.7965	3.57736e-27	3.86407e-25	B-cell genes
KANK2	1019.35	1.00648	0.0932933	10.7884	3.90573e-27	4.18862e-25	iMac genes
HIST1H2AC	1958.11	-0.807324	0.0749865	-10.7663	4.96762e-27	5.28963e-25	stable genes
IL1B	407.075	1.44709	0.134494	10.7595	5.3433e-27	5.64959e-25	iMac genes
CDKN1A	2277.36	-0.74394	0.0692937	-10.736	6.89371e-27	7.23791e-25	iMac genes
UBE4A	1988.54	0.750871	0.0703777	10.6692	1.41899e-26	1.47949e-24	stable genes
AFF3	925.139	-0.964339	0.0909922	-10.598	3.04281e-26	3.15068e-24	iMac genes
FAM20C	957.924	1.04446	0.0987564	10.5761	3.84627e-26	3.95534e-24	iMac genes
HIST1H2AE	2354.51	-0.805412	0.0761998	-10.5697	4.11659e-26	4.20452e-24	B-cell genes
CASC5	1665.38	-0.843257	0.079884	-10.556	4.76419e-26	4.83308e-24	stable genes
DLX3	237.512	1.91854	0.183509	10.4547	1.39367e-25	1.40433e-23	iMac genes
RALGAPA1	581.596	1.25117	0.119771	10.4464	1.52168e-25	1.5231e-23	stable genes
TOMM20	2137.16	0.697426	0.0669404	10.4186	2.03882e-25	2.02721e-23	B-cell genes
PNMA3	78.7322	4.47688	0.431993	10.3633	3.64086e-25	3.59631e-23	stable genes
ETFDH	437.213	1.32808	0.128366	10.346	4.3622e-25	4.28066e-23	stable genes
AZI2	819.447	1.08748	0.105307	10.3268	5.33306e-25	5.19939e-23	B-cell genes
ATP1A3	572.927	-1.67152	0.161908	-10.3239	5.49461e-25	5.32233e-23	B-cell genes
COL27A1	1202.03	-0.950708	0.092503	-10.2776	8.89275e-25	8.55871e-23	B-cell genes
GAPDH	25867.2	-0.401778	0.0391415	-10.2648	1.01576e-24	9.71381e-23	stable genes
HEXIM1	1647.47	0.724807	0.0707244	10.2483	1.20401e-24	1.14412e-22	iMac genes
STS	697.872	-1.11893	0.109258	-10.2411	1.2977e-24	1.22539e-22	iMac genes
TTLL4	713.127	1.06676	0.104313	10.2266	1.50724e-24	1.41436e-22	stable genes
SLC37A3	845.019	1.07561	0.105225	10.222	1.58032e-24	1.47372e-22	iMac genes
TRIB1	1931.54	0.7173	0.0702896	10.2049	1.88479e-24	1.7468e-22	iMac genes
VCL	2350.63	0.676315	0.0664092	10.1841	2.33611e-24	2.1518e-22	stable genes
ALS2CL	225.719	1.97119	0.193775	10.1726	2.62926e-24	2.40706e-22	iMac genes
RNF152	250.386	1.98641	0.195507	10.1603	2.98251e-24	2.7139e-22	B-cell genes
ARHGAP11A	1390.83	-0.852761	0.0840659	-10.144	3.52534e-24	3.18852e-22	stable genes
PLEKHA5	698.066	1.1169	0.110498	10.1078	5.09939e-24	4.58457e-22	B-cell genes
NCAPG	1479.81	-0.800121	0.0795623	-10.0565	8.59784e-24	7.68381e-22	B-cell genes
HIST1H4B	1087.84	-1.04958	0.104448	-10.0488	9.30009e-24	8.26222e-22	B-cell genes
HOMER3	645.065	-1.06457	0.106066	-10.0369	1.04952e-23	9.26915e-22	iMac genes
FRAT2	1089.47	0.837483	0.0837599	9.99862	1.54542e-23	1.3569e-21	iMac genes
STMN1	3441	-0.575301	0.0575877	-9.99001	1.6857e-23	1.47146e-21	B-cell genes
SCD	3956.61	-0.664731	0.0666088	-9.97963	1.87163e-23	1.62432e-21	B-cell genes
HIST1H2BN	1239.54	-0.878679	0.0882069	-9.96156	2.24501e-23	1.93716e-21	B-cell genes
NAB2	630.417	-1.06772	0.107237	-9.9567	2.35757e-23	2.02266e-21	iMac genes
SLC38A2	2983.67	-0.576305	0.0579012	-9.95325	2.4408e-23	2.08217e-21	stable genes
PRKCH	148.916	2.63832	0.26566	9.93117	3.0465e-23	2.58419e-21	B-cell genes
KLF6	1080.08	0.854263	0.086308	9.89785	4.25335e-23	3.58763e-21	iMac genes
GGA2	2911.61	-0.564114	0.0571194	-9.87605	5.28763e-23	4.43511e-21	iMac genes
SLC4A1AP	474.13	1.23704	0.125467	9.85946	6.23866e-23	5.20373e-21	stable genes
EFNB2	581.091	1.53206	0.156085	9.81556	9.64998e-23	8.00469e-21	B-cell genes
CENPE	1600.56	-0.818515	0.0836949	-9.77975	1.37553e-22	1.13474e-20	B-cell genes
CAPG	627.716	1.03812	0.106188	9.77628	1.42349e-22	1.16788e-20	iMac genes
TFRC	2510.28	-0.68124	0.0698236	-9.75659	1.72873e-22	1.41061e-20	stable genes
TSPAN13	221.933	2.18341	0.223894	9.75201	1.80851e-22	1.46773e-20	B-cell genes
NRP1	329.55	-1.46534	0.15067	-9.72544	2.34881e-22	1.89597e-20	iMac genes
HLX	1445.64	0.735286	0.0756194	9.72351	2.39394e-22	1.92207e-20	iMac genes
BRD8	1243.09	-0.768944	0.0791036	-9.72072	2.46038e-22	1.9649e-20	iMac genes
NLRP1	3469.28	0.55185	0.0568644	9.70466	2.88022e-22	2.28802e-20	iMac genes
MAML2	313.13	-1.44607	0.149447	-9.67617	3.8072e-22	3.00849e-20	iMac genes
MCM4	3943.02	-0.552497	0.0572037	-9.65842	4.52788e-22	3.55924e-20	B-cell genes
C10orf118	726.296	1.00532	0.104156	9.65202	4.81959e-22	3.76882e-20	iMac genes
YES1	333.217	1.59978	0.165766	9.65086	4.87452e-22	3.79202e-20	stable genes
IL6ST	2058.11	0.626547	0.0649623	9.64478	5.17212e-22	4.00279e-20	iMac genes
S100A9	19739.9	-0.465483	0.0483833	-9.62074	6.53579e-22	5.03222e-20	iMac genes
TRIM9	247.669	1.65478	0.172169	9.61139	7.15794e-22	5.48312e-20	stable genes
GLUL	3753.18	-0.498528	0.0519322	-9.59961	8.02511e-22	6.11619e-20	iMac genes
REST	2413.05	-0.598423	0.0623625	-9.59588	8.32046e-22	6.30927e-20	iMac genes
N4BP3	204.861	-2.13971	0.223505	-9.57341	1.03436e-21	7.76498e-20	B-cell genes
HIST1H4L	1451.25	-0.803039	0.083881	-9.57355	1.033e-21	7.76498e-20	B-cell genes
ACTB	44005.1	-0.415199	0.0435294	-9.53834	1.45141e-21	1.08416e-19	stable genes
RHOH	535.908	1.11796	0.117231	9.53635	1.47955e-21	1.0997e-19	stable genes
HIST1H2AB	537.684	-1.26292	0.132641	-9.52132	1.70996e-21	1.26469e-19	B-cell genes
UBXN2B	1316.3	0.74881	0.0788088	9.50161	2.06676e-21	1.52109e-19	stable genes
ENDOD1	1147	1.16089	0.122216	9.49865	2.12638e-21	1.55734e-19	B-cell genes
SREBF2	3260.62	-0.53408	0.056278	-9.49004	2.3095e-21	1.68324e-19	stable genes
MFI2	561.942	-1.46541	0.154561	-9.48115	2.51498e-21	1.82415e-19	B-cell genes
FYB	410.964	1.24469	0.13165	9.4545	3.24584e-21	2.33384e-19	iMac genes
ANLN	1207.12	-0.795251	0.0841143	-9.4544	3.24878e-21	2.33384e-19	iMac genes
ADAMTS10	1060.2	0.838708	0.0887511	9.45011	3.3848e-21	2.41997e-19	iMac genes
EXT2	277.107	-1.64435	0.174072	-9.4464	3.50692e-21	2.4954e-19	stable genes
PLCB2	2824.62	0.556264	0.0589437	9.43722	3.82817e-21	2.71114e-19	iMac genes
MCAM	672.063	-1.71221	0.181975	-9.40903	5.00736e-21	3.5296e-19	B-cell genes
MYBL2	1810.98	-0.785071	0.0836714	-9.38279	6.42516e-21	4.50782e-19	B-cell genes
HNRNPA2B1	13985.8	-0.377945	0.0404791	-9.33681	9.9277e-21	6.93276e-19	B-cell genes
EMB	3042.51	0.604716	0.0647839	9.33437	1.01597e-20	7.06195e-19	iMac genes
CCDC7	229.136	1.65549	0.177982	9.30145	1.38543e-20	9.58564e-19	stable genes
ZBTB39	345.455	-1.65394	0.178002	-9.29166	1.51907e-20	1.0462e-18	stable genes
MAFB	1261.78	0.720523	0.0777083	9.27216	1.82418e-20	1.2506e-18	iMac genes
FASN	6255.1	-0.507396	0.0549388	-9.23566	2.56709e-20	1.75192e-18	B-cell genes
RBPJ	2385.82	-0.561063	0.0607628	-9.23365	2.61554e-20	1.77691e-18	iMac genes
ACO1	312.609	-1.58469	0.171763	-9.22601	2.80895e-20	1.89971e-18	stable genes
IQGAP3	1191.02	-0.751237	0.0814758	-9.22037	2.96085e-20	1.99346e-18	stable genes
TBC1D1	1875.25	0.638701	0.0692795	9.21919	2.99365e-20	2.00655e-18	stable genes
HIST2H2AB	1054.59	-0.825021	0.0896704	-9.20059	3.55975e-20	2.37538e-18	stable genes
UCHL1	913.919	0.887737	0.096521	9.19734	3.66905e-20	2.43749e-18	B-cell genes
MTDH	6548.28	0.398807	0.0434472	9.17912	4.34619e-20	2.87461e-18	stable genes
CARHSP1	934.596	-0.954815	0.104261	-9.15798	5.28799e-20	3.48219e-18	stable genes
SPTBN1	10312.5	-0.370749	0.0406093	-9.12964	6.87273e-20	4.4864e-18	B-cell genes
WHSC1	3445.92	-0.508215	0.0556663	-9.12968	6.87008e-20	4.4864e-18	B-cell genes
ZFAND4	195.238	1.77169	0.195154	9.07844	1.10139e-19	7.15854e-18	stable genes
JUN	1157.17	0.747895	0.082565	9.05825	1.32558e-19	8.57855e-18	iMac genes
PRKDC	12619	-0.369737	0.0408603	-9.04881	1.44534e-19	9.31343e-18	B-cell genes
RORB	1250.3	-0.875829	0.0968634	-9.0419	1.53976e-19	9.87945e-18	B-cell genes
BRIP1	708.153	-1.02385	0.113347	-9.03291	1.6717e-19	1.06804e-17	B-cell genes
VSIG4	105.102	-2.53628	0.281129	-9.02176	1.85084e-19	1.17748e-17	iMac genes
SLAIN1	460.85	1.25024	0.138695	9.01437	1.98014e-19	1.25442e-17	B-cell genes
POLQ	1339.27	-0.734769	0.0815274	-9.01254	2.01336e-19	1.27011e-17	stable genes
KIF11	2027.91	-0.627294	0.0696451	-9.00702	2.11741e-19	1.33016e-17	B-cell genes
HINT3	288.582	1.51458	0.168315	8.99853	2.28763e-19	1.43111e-17	stable genes
SORBS1	1267.12	1.84255	0.204868	8.99383	2.38759e-19	1.48744e-17	B-cell genes
FXN	285.633	-1.71655	0.190916	-8.99112	2.44725e-19	1.5183e-17	B-cell genes
CDKN2A	484.137	-1.09696	0.122094	-8.98459	2.59692e-19	1.60453e-17	iMac genes
NPC1	891.678	0.832083	0.093263	8.92189	4.5838e-19	2.82054e-17	stable genes
ITPR2	1321.17	-0.682376	0.076539	-8.9154	4.86079e-19	2.97877e-17	iMac genes
FOXM1	1142.54	-0.777873	0.0873889	-8.90128	5.52068e-19	3.36941e-17	stable genes
BUB1B	1343.37	-0.740653	0.0832231	-8.89961	5.60421e-19	3.40654e-17	B-cell genes
HYDIN2	90.6681	2.65327	0.299583	8.85654	8.25337e-19	4.99662e-17	iMac genes
HIST1H3D	1650.51	-0.800867	0.0904613	-8.85315	8.50837e-19	5.13031e-17	B-cell genes
LOC101927952	130.775	2.15395	0.24342	8.84867	8.85688e-19	5.31909e-17	iMac genes
GDE1	572.648	0.997555	0.112847	8.8399	9.58043e-19	5.7307e-17	stable genes
LINC00342	281.603	-1.66093	0.188048	-8.83248	1.02384e-18	6.09998e-17	stable genes
NCAPD2	2254.27	-0.579914	0.0658092	-8.81204	1.22884e-18	7.29241e-17	stable genes
INSIG1	980.669	-0.859137	0.0976796	-8.79547	1.42453e-18	8.42043e-17	stable genes
BMF	1000.35	-0.759667	0.0867034	-8.76167	1.92382e-18	1.13271e-16	iMac genes
TPX2	1883.52	-0.625401	0.0715212	-8.74427	2.24468e-18	1.31647e-16	B-cell genes
SLFN5	739.4	0.886097	0.101392	8.73936	2.34441e-18	1.36961e-16	stable genes
CEP128	656.718	-0.968051	0.110811	-8.73603	2.4144e-18	1.40503e-16	stable genes
EVI2B	3096.06	0.492582	0.0564153	8.73135	2.51641e-18	1.45874e-16	iMac genes
NUSAP1	1965.47	-0.60605	0.0694442	-8.72716	2.6115e-18	1.50804e-16	B-cell genes
ANKS1B	2458.41	-0.861591	0.0988179	-8.71898	2.80717e-18	1.61482e-16	B-cell genes
BAHCC1	1976.11	-0.636827	0.0733806	-8.67842	4.0131e-18	2.29972e-16	B-cell genes
SRI	459.774	1.21674	0.140224	8.67714	4.05832e-18	2.31679e-16	B-cell genes
TLR6	141.09	-2.13767	0.24638	-8.67628	4.08915e-18	2.32555e-16	iMac genes
RHBDL3	56.6161	3.73275	0.431323	8.6542	4.96392e-18	2.81239e-16	iMac genes
TTC7A	1925.44	-0.587668	0.0679262	-8.65157	5.07976e-18	2.8672e-16	stable genes
HIST1H2AK	453.667	-1.2501	0.144733	-8.63728	5.75653e-18	3.23703e-16	stable genes
ATG16L2	1684.72	0.609693	0.0706506	8.62969	6.1516e-18	3.44627e-16	iMac genes
SRD5A3	267.413	1.45026	0.168523	8.60572	7.58372e-18	4.23279e-16	stable genes
ACOT9	68.7928	3.27125	0.381022	8.58544	9.04876e-18	5.03178e-16	iMac genes
FJX1	286.727	1.49417	0.174128	8.58089	9.41437e-18	5.21577e-16	B-cell genes
ISYNA1	626.777	0.967701	0.11305	8.5599	1.12964e-17	6.23543e-16	stable genes
HNRNPU-AS1	1549.2	-0.6446	0.0753641	-8.55315	1.19776e-17	6.58723e-16	iMac genes
MPP1	796.913	-0.824696	0.0965406	-8.54248	1.31371e-17	7.19857e-16	iMac genes
KCTD12	7372.88	0.368037	0.0432255	8.51435	1.67533e-17	9.14668e-16	iMac genes
MALAT1	235573	0.321225	0.0380081	8.4515	2.87586e-17	1.56443e-15	iMac genes
MCM2	1493.74	-0.727425	0.0861904	-8.43974	3.18043e-17	1.72386e-15	B-cell genes
NEURL1B	912.258	-0.857261	0.101734	-8.42651	3.56114e-17	1.92327e-15	B-cell genes
USP53	474.647	1.07746	0.128077	8.41259	4.01038e-17	2.15813e-15	stable genes
BUB1	1433.1	-0.691076	0.0822112	-8.4061	4.23852e-17	2.27275e-15	B-cell genes
CD36	232.099	-1.52682	0.181669	-8.40443	4.29953e-17	2.29726e-15	iMac genes
SLCO5A1	267.375	-1.68947	0.202166	-8.35683	6.44283e-17	3.43024e-15	B-cell genes
HIST1H3J	483.707	-1.13454	0.136059	-8.33859	7.51793e-17	3.98849e-15	B-cell genes
HLA-B	5602.08	-0.442589	0.0531286	-8.33052	8.04877e-17	4.25508e-15	iMac genes
CTR9	734.718	0.874934	0.105208	8.31623	9.08074e-17	4.7838e-15	stable genes
RASSF4	1705.37	-0.567566	0.0682561	-8.31524	9.1568e-17	4.807e-15	iMac genes
ARRDC4	204.224	1.66298	0.200382	8.29905	1.04944e-16	5.49e-15	B-cell genes
KIF22	1105.84	-0.755338	0.0910303	-8.29766	1.06184e-16	5.51644e-15	B-cell genes
DTWD2	194.571	1.59922	0.192729	8.29773	1.06118e-16	5.51644e-15	stable genes
HIST1H4C	1588.23	-0.637361	0.0768182	-8.29701	1.06762e-16	5.52733e-15	B-cell genes
EMILIN2	1765.64	-0.598768	0.0722989	-8.28184	1.21285e-16	6.25764e-15	iMac genes
KIAA1432	3147.49	-0.478545	0.057823	-8.27604	1.27341e-16	6.54762e-15	iMac genes
CYSLTR1	56.9342	3.48999	0.421862	8.27284	1.30809e-16	6.70296e-15	stable genes
GPR137B	284.178	1.28892	0.155932	8.26595	1.38588e-16	7.07744e-15	iMac genes
NCKAP1L	3036.97	0.47536	0.0575386	8.26159	1.43748e-16	7.31605e-15	iMac genes
SUPT7L	812.885	0.807415	0.0981747	8.22427	1.96382e-16	9.96105e-15	stable genes
KNTC1	1433.85	-0.70878	0.0862637	-8.21643	2.09657e-16	1.05986e-14	B-cell genes
LOC100271836	764.242	0.817421	0.0996177	8.20558	2.29482e-16	1.15619e-14	stable genes
MRPS2	433.626	-1.19294	0.145453	-8.20152	2.37361e-16	1.19188e-14	B-cell genes
SDC3	418.782	1.05863	0.129145	8.19724	2.45978e-16	1.23104e-14	iMac genes
KBTBD11	1468.66	-0.664024	0.0810555	-8.19221	2.5647e-16	1.27928e-14	stable genes
NCAPG2	1235.35	-0.669247	0.0816973	-8.19179	2.57369e-16	1.27951e-14	stable genes
NLRC5	2285.09	-0.529349	0.064777	-8.17187	3.03643e-16	1.50459e-14	iMac genes
ZSWIM6	1242.88	-0.658831	0.0806443	-8.16959	3.09447e-16	1.5283e-14	iMac genes
NBEAL2	2642.22	0.549544	0.0673186	8.16333	3.25914e-16	1.59911e-14	stable genes
CEP135	486.75	-1.08384	0.132766	-8.16354	3.25344e-16	1.59911e-14	stable genes
HMOX1	258.42	-1.33836	0.164158	-8.15285	3.55447e-16	1.73833e-14	iMac genes
MIF	2026.72	-0.676519	0.0832726	-8.12414	4.50529e-16	2.19618e-14	B-cell genes
SAAL1	249.637	-1.61928	0.199348	-8.12291	4.55146e-16	2.21151e-14	B-cell genes
CBLB	955.401	-0.725761	0.0894658	-8.11216	4.97284e-16	2.40846e-14	stable genes
SDC2	611.303	-0.881581	0.108779	-8.10436	5.30224e-16	2.55974e-14	iMac genes
KIF20B	1331.08	-0.643472	0.0794109	-8.10306	5.35931e-16	2.579e-14	stable genes
PIM3	336.571	-1.27396	0.157382	-8.0947	5.74046e-16	2.75359e-14	stable genes
ST3GAL1	1345.35	-0.628922	0.0778742	-8.07613	6.6852e-16	3.19655e-14	iMac genes
MAP1B	1538.35	-0.704145	0.0873135	-8.06455	7.35043e-16	3.50347e-14	B-cell genes
E2F8	508.778	-1.01191	0.125521	-8.06165	7.52733e-16	3.57644e-14	stable genes
CEBPD	189.22	-1.54809	0.192363	-8.04774	8.43386e-16	3.99451e-14	iMac genes
OSCAR	350.836	1.13767	0.141394	8.0461	8.54753e-16	4.03562e-14	iMac genes
SAT1	1155.39	-0.654186	0.0814042	-8.03627	9.26139e-16	4.35895e-14	iMac genes
HES1	45.3803	-4.68568	0.583369	-8.03211	9.58134e-16	4.49545e-14	iMac genes
DENND5B	352.703	1.17253	0.146243	8.01766	1.07781e-15	5.04117e-14	B-cell genes
SLC25A29	1273.98	-0.668153	0.083415	-8.00998	1.14728e-15	5.34946e-14	stable genes
TICRR	1022.12	-0.772953	0.0965046	-8.00949	1.15181e-15	5.35394e-14	B-cell genes
MTURN	724.928	-0.790006	0.0986527	-8.00796	1.16631e-15	5.40463e-14	iMac genes
LYST	13053.4	-0.301911	0.0377159	-8.00488	1.19587e-15	5.52457e-14	iMac genes
ATHL1	677.623	0.855456	0.106923	8.00067	1.23746e-15	5.69914e-14	stable genes
HNRNPU	12746.1	-0.316795	0.0396081	-7.99825	1.26199e-15	5.79433e-14	stable genes
IGFBP4	988.101	0.720744	0.090222	7.98856	1.36521e-15	6.24916e-14	stable genes
SELPLG	389.443	1.07412	0.134505	7.9857	1.39724e-15	6.37634e-14	iMac genes
H2AFY2	376.153	-1.32563	0.16609	-7.98141	1.44666e-15	6.58186e-14	B-cell genes
ID3	711.48	-0.993021	0.1245	-7.97604	1.511e-15	6.85384e-14	stable genes
YBX1	8536.47	-0.335516	0.042099	-7.96968	1.59083e-15	7.1726e-14	stable genes
MYO1B	752.785	-1.30279	0.163464	-7.96989	1.58816e-15	7.1726e-14	B-cell genes
CIT	1318.01	-0.779981	0.0979465	-7.96334	1.6746e-15	7.50858e-14	stable genes
HNRNPH1	8146.56	-0.352719	0.0442931	-7.96328	1.67535e-15	7.50858e-14	stable genes
ASAP1	7147.23	0.365526	0.0459073	7.96226	1.68922e-15	7.54819e-14	iMac genes
TNNT1	537.044	0.944984	0.118784	7.9555	1.78411e-15	7.94854e-14	iMac genes
NCBP2	983.948	0.731286	0.0919383	7.9541	1.80441e-15	8.01522e-14	B-cell genes
PLCG1	1085.86	0.731706	0.0921358	7.9416	1.99583e-15	8.82101e-14	B-cell genes
OXCT1	836.012	-0.871106	0.10969	-7.9415	1.99757e-15	8.82101e-14	B-cell genes
LCP1	17301.2	-0.318555	0.0401425	-7.93562	2.09446e-15	9.22176e-14	iMac genes
JARID2	2189.73	-0.526393	0.0663796	-7.93004	2.19072e-15	9.6174e-14	iMac genes
HLA-E	2465.67	-0.481809	0.0609339	-7.90708	2.63492e-15	1.15337e-13	iMac genes
CD300E	213.889	-1.47654	0.186823	-7.90342	2.71352e-15	1.18433e-13	iMac genes
HIST1H4A	686.306	-0.906254	0.114792	-7.89477	2.90842e-15	1.26571e-13	B-cell genes
BCL9	532.979	1.03775	0.13158	7.88688	3.09833e-15	1.34059e-13	B-cell genes
CITED2	577.579	0.878662	0.111404	7.88718	3.09086e-15	1.34059e-13	iMac genes
HJURP	674.386	-0.864628	0.109643	-7.88582	3.12479e-15	1.34815e-13	stable genes
NLRP12	3800.94	-0.410219	0.052128	-7.86945	3.56195e-15	1.53235e-13	iMac genes
CNTNAP1	201.325	1.53302	0.194869	7.8669	3.63551e-15	1.55953e-13	stable genes
DEF6	475.905	-1.06567	0.135583	-7.85994	3.84331e-15	1.64397e-13	stable genes
NASP	2773.78	-0.481902	0.0613597	-7.85373	4.03844e-15	1.72253e-13	B-cell genes
PGM2	684.339	0.883145	0.11248	7.85156	4.10908e-15	1.7477e-13	B-cell genes
SLC4A7	3398.64	-0.466951	0.0595313	-7.84379	4.37165e-15	1.85412e-13	stable genes
SFMBT2	895.031	-0.832194	0.106357	-7.82452	5.09616e-15	2.15532e-13	B-cell genes
CDK6	3147.45	-0.586698	0.0749881	-7.82388	5.1219e-15	2.16012e-13	B-cell genes
EEF2K	809.509	0.919219	0.117641	7.81378	5.54989e-15	2.33406e-13	B-cell genes
HIST2H2AC	1407.28	-0.638093	0.0817326	-7.80707	5.8531e-15	2.44787e-13	stable genes
NFRKB	783.162	0.772821	0.0989884	7.80718	5.84796e-15	2.44787e-13	stable genes
CMTM3	1291.78	0.60448	0.0774743	7.80232	6.07776e-15	2.53476e-13	iMac genes
SRSF2	2944.79	-0.467796	0.0600175	-7.79433	6.47525e-15	2.69306e-13	stable genes
FRMD4B	691.552	-0.904946	0.116129	-7.79259	6.56484e-15	2.72278e-13	stable genes
RUFY2	239.966	-1.3612	0.174776	-7.78826	6.79372e-15	2.80994e-13	iMac genes
DDX46	1649.21	-0.574556	0.0738165	-7.78357	7.05057e-15	2.90817e-13	stable genes
RIMKLB	1102.02	0.66048	0.084992	7.77108	7.78187e-15	3.20101e-13	stable genes
DYNC2H1	404.48	-1.08878	0.140235	-7.76401	8.22827e-15	3.37539e-13	stable genes
RHOU	310.673	-1.15481	0.149517	-7.72363	1.13058e-14	4.62523e-13	iMac genes
GBAS	557.962	-0.969922	0.125587	-7.72308	1.13551e-14	4.63274e-13	stable genes
FAM171A1	335.104	-1.4708	0.190586	-7.71724	1.18878e-14	4.82389e-13	B-cell genes
RAG1	2383.58	-1.93134	0.250255	-7.71748	1.18649e-14	4.82389e-13	B-cell genes
DPP8	1279.19	-0.63196	0.0819205	-7.71432	1.2163e-14	4.9138e-13	iMac genes
ATAD5	1074.4	-0.754962	0.0978709	-7.71385	1.22076e-14	4.9138e-13	B-cell genes
WEE2-AS1	45.9542	5.30084	0.687165	7.71407	1.21868e-14	4.9138e-13	B-cell genes
RNF216	1111.41	0.649791	0.0843445	7.70402	1.31856e-14	5.29329e-13	stable genes
PARD3	357.277	-1.61229	0.209602	-7.69215	1.44678e-14	5.79251e-13	B-cell genes
EED	534.61	0.911819	0.118574	7.6899	1.47253e-14	5.87992e-13	stable genes
CCNA2	945.324	-0.838107	0.109268	-7.67017	1.71769e-14	6.84069e-13	B-cell genes
BCL3	516.651	-0.880529	0.114873	-7.66526	1.78466e-14	7.08858e-13	iMac genes
PKN3	265.905	-1.73274	0.226395	-7.65361	1.9542e-14	7.74151e-13	B-cell genes
IKBKAP	793.632	0.78151	0.102221	7.64527	2.08513e-14	8.23848e-13	B-cell genes
KLF13	2237.49	-0.500753	0.0655169	-7.64312	2.12022e-14	8.35512e-13	iMac genes
KIAA1211	377.551	-1.43128	0.187317	-7.64091	2.15684e-14	8.47717e-13	B-cell genes
PIGO	327.103	-1.21436	0.15901	-7.637	2.22339e-14	8.71591e-13	stable genes
FAM69B	597.189	-0.85191	0.111666	-7.62909	2.36414e-14	9.24354e-13	iMac genes
G3BP1	4204.12	0.419572	0.0550152	7.62648	2.41258e-14	9.40844e-13	B-cell genes
SCAF8	1872.24	-0.525078	0.0690985	-7.59898	2.98475e-14	1.16096e-12	stable genes
SORL1	832.483	-0.761474	0.100298	-7.59208	3.14818e-14	1.21822e-12	iMac genes
UBE2E3	794.169	0.847221	0.111593	7.59208	3.14805e-14	1.21822e-12	stable genes
CHD5	316.985	-1.15373	0.152037	-7.58845	3.23746e-14	1.24954e-12	iMac genes
ITM2C	1405.72	-0.614054	0.0809409	-7.58644	3.28814e-14	1.26585e-12	iMac genes
IGFBP2	757.716	-0.8314	0.109647	-7.58252	3.38917e-14	1.30141e-12	iMac genes
IFITM2	1108.12	-0.724813	0.0956113	-7.58083	3.43347e-14	1.31505e-12	stable genes
TUBA1A	1459.6	-0.612397	0.0808549	-7.57402	3.61861e-14	1.38228e-12	stable genes
FANCI	1237.71	-0.64567	0.0852516	-7.5737	3.6274e-14	1.38228e-12	B-cell genes
MDGA2	186.277	-1.52849	0.201965	-7.56807	3.78799e-14	1.43982e-12	iMac genes
HELLS	1293.67	-0.703092	0.0929454	-7.56458	3.89128e-14	1.47534e-12	B-cell genes
PCSK6	169.676	2.24735	0.297372	7.55735	4.11365e-14	1.55573e-12	B-cell genes
ADARB1	1060.92	-0.70371	0.0932029	-7.5503	4.34242e-14	1.63812e-12	B-cell genes
C2CD5	1331.56	0.608831	0.0807881	7.53615	4.84048e-14	1.82143e-12	stable genes
NCAPH	850.436	-0.777151	0.103137	-7.53512	4.87879e-14	1.83125e-12	B-cell genes
METTL25	146.175	1.80221	0.239567	7.52278	5.36232e-14	2.00773e-12	stable genes
BMP2K	2115.43	-0.487512	0.0650021	-7.49995	6.3844e-14	2.38446e-12	iMac genes
SPRY4	433.035	0.982605	0.13114	7.4928	6.74196e-14	2.51176e-12	stable genes
NISCH	2244.18	0.456845	0.0610876	7.47853	7.51572e-14	2.7931e-12	iMac genes
C3orf58	500.641	0.922422	0.123607	7.46251	8.48877e-14	3.14692e-12	iMac genes
MPRIP	3886.92	0.397041	0.0532722	7.45305	9.12037e-14	3.37274e-12	B-cell genes
MDM2	11258.8	-0.310873	0.0417598	-7.44431	9.74497e-14	3.59486e-12	stable genes
CKAP5	2595.35	-0.456033	0.0612708	-7.44292	9.84867e-14	3.62421e-12	stable genes
TFEC	318.941	1.17548	0.15801	7.43928	1.01236e-13	3.71628e-12	iMac genes
TLR1	185.384	-1.57449	0.21175	-7.43562	1.0408e-13	3.81138e-12	iMac genes
SH3TC1	585.886	-0.867721	0.116714	-7.43461	1.04879e-13	3.83127e-12	iMac genes
GPR124	976.88	-0.656462	0.088395	-7.42646	1.11539e-13	4.06469e-12	iMac genes
TNFAIP3	268.339	1.42095	0.191366	7.4253	1.12523e-13	4.09061e-12	B-cell genes
ANKRD36	574.69	-0.917843	0.123734	-7.41785	1.19035e-13	4.31689e-12	stable genes
VPS13A	2238.19	-0.504138	0.0679887	-7.41503	1.21598e-13	4.39922e-12	stable genes
MSI2	2179.43	-0.666911	0.0901149	-7.40068	1.35491e-13	4.89005e-12	B-cell genes
LRRC8B	724.802	0.789077	0.10664	7.39945	1.36749e-13	4.9236e-12	B-cell genes
HMGN2	2931.87	-0.429813	0.0582122	-7.38355	1.54119e-13	5.53574e-12	stable genes
ITGB7	589.491	0.812093	0.110252	7.36582	1.76058e-13	6.30868e-12	iMac genes
GRIK5	986.586	0.659525	0.0896721	7.35486	1.91132e-13	6.83252e-12	iMac genes
RUFY3	602.749	-0.811459	0.110492	-7.34407	2.07193e-13	7.38905e-12	stable genes
KIF18B	800.823	-0.801518	0.109358	-7.32933	2.31309e-13	8.22957e-12	B-cell genes
KIF25-AS1	242.629	1.2577	0.171634	7.32777	2.34007e-13	8.30586e-12	stable genes
PRAME	101.221	10.7053	1.4624	7.32033	2.47362e-13	8.75919e-12	stable genes
CD74	8379.96	0.321747	0.0439731	7.3169	2.53758e-13	8.96454e-12	stable genes
GRIP1	118.449	-2.87086	0.392659	-7.31134	2.64483e-13	9.32149e-12	B-cell genes
PKD2	1370.02	0.604014	0.0827397	7.30016	2.87419e-13	1.01061e-11	stable genes
FRA10AC1	217.634	1.37371	0.188203	7.29909	2.89729e-13	1.01635e-11	stable genes
APLP2	12005.1	-0.342924	0.0470298	-7.29163	3.06227e-13	1.07172e-11	iMac genes
SIPA1L1	1349.53	-0.571955	0.0785356	-7.28275	3.27072e-13	1.14201e-11	iMac genes
KDM3A	1292.92	-0.683668	0.0938902	-7.28157	3.29968e-13	1.14738e-11	iMac genes
BCOR	2537.3	-0.489179	0.0671811	-7.2815	3.30138e-13	1.14738e-11	iMac genes
RSL24D1	1476.51	0.535869	0.0736965	7.27129	3.56073e-13	1.23466e-11	stable genes
TNFRSF1B	1032.02	-0.616025	0.0847936	-7.26499	3.73062e-13	1.29059e-11	iMac genes
NFKBID	449.464	-0.937155	0.129337	-7.24581	4.2985e-13	1.48363e-11	iMac genes
ITGB2-AS1	940.135	0.6376	0.0880711	7.2396	4.49999e-13	1.54961e-11	iMac genes
HS6ST2	121.454	-2.03442	0.281204	-7.23465	4.66724e-13	1.60352e-11	stable genes
PDK1	481.713	-0.910233	0.125947	-7.2271	4.93406e-13	1.69132e-11	stable genes
EML3	1049.12	0.653316	0.090589	7.21187	5.51872e-13	1.88743e-11	iMac genes
EPHB6	331.562	1.06729	0.147999	7.21147	5.53524e-13	1.88878e-11	iMac genes
STIL	541.586	-0.867945	0.120483	-7.20386	5.85297e-13	1.99267e-11	stable genes
LIG1	1046.57	-0.675255	0.0937879	-7.1998	6.0299e-13	2.04825e-11	B-cell genes
RRM2	1662.14	-0.57572	0.0800505	-7.19195	6.38702e-13	2.16467e-11	B-cell genes
SMC2	1817.69	-0.521048	0.07246	-7.19084	6.43959e-13	2.17757e-11	B-cell genes
FADS2	2641.03	-0.483991	0.0673158	-7.18986	6.48576e-13	2.18825e-11	stable genes
CTSA	1463.44	0.522484	0.0727566	7.18126	6.9073e-13	2.32525e-11	iMac genes
FLJ44342	671.706	0.767009	0.106903	7.17482	7.24033e-13	2.43191e-11	B-cell genes
TRIM36	247.627	-1.25963	0.175603	-7.17321	7.3257e-13	2.45509e-11	iMac genes
PSD4	929.872	0.640246	0.0893234	7.16773	7.62515e-13	2.54976e-11	iMac genes
POLA1	1035.24	-0.683419	0.095354	-7.16718	7.65567e-13	2.55427e-11	B-cell genes
DHX30	1115.61	-0.677653	0.0945544	-7.16681	7.67662e-13	2.55558e-11	B-cell genes
AK3	684.953	0.782386	0.109203	7.1645	7.80697e-13	2.59323e-11	stable genes
RALGAPA2	1656.55	0.504449	0.0704485	7.16054	8.03605e-13	2.66343e-11	stable genes
MTBP	393.62	-1.03406	0.14446	-7.15813	8.17865e-13	2.70472e-11	stable genes
UCK2	960.083	-0.680257	0.095137	-7.15029	8.65976e-13	2.85753e-11	stable genes
AGFG1	1976.76	-0.473578	0.066257	-7.14759	8.83156e-13	2.90783e-11	iMac genes
SQLE	1477.88	-0.548264	0.0767823	-7.1405	9.2991e-13	3.05507e-11	stable genes
SERINC5	2462.36	-0.442319	0.0620063	-7.13345	9.78803e-13	3.20868e-11	stable genes
GPI	3026.09	-0.460349	0.064537	-7.13309	9.81373e-13	3.2101e-11	stable genes
SLC25A4	139.826	1.7907	0.251824	7.11093	1.15262e-12	3.76206e-11	B-cell genes
MAGI1	306.351	-1.82318	0.25641	-7.11041	1.15698e-12	3.76808e-11	B-cell genes
SPAG5	1173.19	-0.681373	0.0958538	-7.10846	1.17343e-12	3.80515e-11	B-cell genes
PLXND1	3822.69	-0.383586	0.0539616	-7.1085	1.17307e-12	3.80515e-11	iMac genes
CDCA2	798.958	-0.735377	0.103556	-7.10127	1.23613e-12	3.99984e-11	B-cell genes
MOB3B	145.78	-2.02908	0.285922	-7.09663	1.27833e-12	4.12748e-11	B-cell genes
AGTPBP1	2005.64	-0.538694	0.0759445	-7.09325	1.30997e-12	4.22057e-11	iMac genes
MACF1	13143.8	0.3227	0.0455255	7.08832	1.35747e-12	4.36426e-11	stable genes
MZT2A	401.735	-1.05925	0.149474	-7.0865	1.37544e-12	4.41258e-11	B-cell genes
PDE3B	1339.13	-0.549627	0.0775802	-7.08463	1.39416e-12	4.4631e-11	iMac genes
LOC100288637	509.152	-0.896497	0.126555	-7.08383	1.40223e-12	4.47937e-11	stable genes
DYNLT3	164.599	1.48231	0.209731	7.06767	1.57559e-12	5.02248e-11	stable genes
TMEM194A	1013.4	-0.652019	0.0923961	-7.05678	1.70406e-12	5.42051e-11	stable genes
QKI	3181.36	-0.384077	0.0544703	-7.05112	1.77485e-12	5.63375e-11	iMac genes
POLE	2135.69	-0.543176	0.0770836	-7.04659	1.83359e-12	5.80791e-11	B-cell genes
ALDOC	227.816	1.33746	0.189848	7.0449	1.85597e-12	5.86644e-11	stable genes
CFH	444.919	0.873919	0.124137	7.03996	1.92292e-12	6.06527e-11	iMac genes
SLC25A5	2330.45	-0.472353	0.0671157	-7.03789	1.95178e-12	6.1434e-11	stable genes
NCAPD3	1168.31	-0.612481	0.0870326	-7.03737	1.95899e-12	6.15318e-11	stable genes
ARHGAP11B	363.214	-1.01445	0.1442	-7.03502	1.99225e-12	6.23161e-11	iMac genes
RP11-35G9.3	169.527	1.46143	0.207731	7.0352	1.98978e-12	6.23161e-11	stable genes
PTK2B	5243.85	0.320158	0.0455151	7.0341	2.00548e-12	6.25992e-11	stable genes
HIST2H3D	578.086	-0.837471	0.119087	-7.03245	2.02937e-12	6.32137e-11	stable genes
JADE1	721.323	-0.76201	0.108396	-7.02988	2.06714e-12	6.4257e-11	B-cell genes
ABCC1	1687.01	0.506001	0.0720067	7.02714	2.10806e-12	6.53933e-11	stable genes
KIF14	824.124	-0.680746	0.0969315	-7.02296	2.17215e-12	6.72426e-11	stable genes
CLEC11A	1148.91	-0.591384	0.0842385	-7.02036	2.21301e-12	6.83666e-11	stable genes
FOSL1	108.209	1.79821	0.256214	7.01838	2.2445e-12	6.91968e-11	stable genes
ADAM10	6119.8	-0.311874	0.0444749	-7.01237	2.34318e-12	7.20911e-11	iMac genes
NDUFB9	2094.98	-0.486567	0.069442	-7.00681	2.43815e-12	7.48598e-11	stable genes
LRRC8C	2657.44	-0.412516	0.0588802	-7.00602	2.45191e-12	7.51286e-11	iMac genes
NR2C1	504.206	-0.903493	0.129003	-7.00364	2.494e-12	7.61838e-11	iMac genes
NID2	1414.35	1.05106	0.150076	7.0035	2.4965e-12	7.61838e-11	B-cell genes
ELK3	946.028	0.719988	0.102822	7.00225	2.51878e-12	7.67077e-11	iMac genes
PTPN6	1596.88	0.552543	0.0789619	6.99759	2.60394e-12	7.91409e-11	B-cell genes
CCR5	103.671	-2.04521	0.29238	-6.99503	2.65199e-12	8.04382e-11	iMac genes
LPHN1	1029.81	0.6094	0.0871319	6.99399	2.67172e-12	8.08735e-11	stable genes
TARS	2260	0.451402	0.064569	6.99099	2.72948e-12	8.24554e-11	stable genes
LOC729732	136.209	-2.05708	0.295054	-6.97189	3.1272e-12	9.42807e-11	B-cell genes
BTNL9	755.637	0.680269	0.0976839	6.96399	3.3078e-12	9.95256e-11	iMac genes
EXTL3	1247.6	0.624759	0.0897188	6.96353	3.31859e-12	9.96506e-11	stable genes
IL10RA	246.236	-1.18129	0.169686	-6.96166	3.36286e-12	1.00778e-10	iMac genes
GPT2	481.962	-0.906315	0.130196	-6.96118	3.37437e-12	1.00922e-10	stable genes
CREG1	3031.34	0.398181	0.0572357	6.95686	3.4794e-12	1.03856e-10	iMac genes
INTS10	1505.69	0.501695	0.0721836	6.95026	3.64609e-12	1.08616e-10	stable genes
NUCKS1	6961.55	-0.332614	0.0478786	-6.94703	3.7305e-12	1.1091e-10	stable genes
FAM84B	221.538	1.31963	0.190121	6.94099	3.89363e-12	1.15532e-10	B-cell genes
RNASE4	55.7466	2.71415	0.39107	6.94033	3.91192e-12	1.15845e-10	iMac genes
METTL5	145.821	-2.02519	0.291857	-6.93899	3.9491e-12	1.16716e-10	B-cell genes
PTGIS	77.6788	-2.18861	0.315431	-6.93846	3.96389e-12	1.16923e-10	iMac genes
FBLN1	512.908	-1.11837	0.161483	-6.92564	4.34016e-12	1.27541e-10	B-cell genes
GSTK1	1197.19	0.553866	0.0799735	6.92561	4.34086e-12	1.27541e-10	iMac genes
VLDLR	563.756	-0.83364	0.12039	-6.92449	4.37562e-12	1.28312e-10	stable genes
TARBP1	1091.78	0.616101	0.0890936	6.91521	4.67166e-12	1.36726e-10	B-cell genes
SH3RF3	808.797	-0.647892	0.0938029	-6.90695	4.9518e-12	1.44643e-10	iMac genes
SLC27A2	81.5892	2.57158	0.372738	6.89916	5.23116e-12	1.52506e-10	B-cell genes
GEN1	1273.77	-0.585696	0.085108	-6.8818	5.91028e-12	1.71971e-10	stable genes
PAM	771	0.704189	0.102354	6.87993	5.98808e-12	1.73898e-10	iMac genes
DIP2B	4000.03	0.347361	0.0505417	6.87277	6.29672e-12	1.82508e-10	iMac genes
COBLL1	140.551	-1.58638	0.231065	-6.86548	6.6266e-12	1.91699e-10	iMac genes
KIF2C	751.844	-0.742047	0.108158	-6.86075	6.85004e-12	1.97782e-10	B-cell genes
LOC100505650	91.3631	-2.05787	0.300025	-6.859	6.93445e-12	1.99835e-10	iMac genes
NBAS	918.915	-0.631307	0.0921172	-6.8533	7.2168e-12	2.07573e-10	stable genes
ASF1A	308.585	-1.12219	0.163926	-6.8457	7.61033e-12	2.18473e-10	stable genes
FGD6	333.979	1.01969	0.149018	6.84269	7.77207e-12	2.22691e-10	B-cell genes
PBX1	4305.93	-0.396818	0.0580495	-6.83586	8.15145e-12	2.33116e-10	B-cell genes
C19orf60	130.136	-1.78168	0.260722	-6.83367	8.27717e-12	2.36261e-10	stable genes
CFP	347.744	0.960688	0.140682	6.82878	8.56405e-12	2.43986e-10	iMac genes
MRC1	180.861	-1.31652	0.193136	-6.81656	9.32451e-12	2.65148e-10	iMac genes
SSRP1	2381.13	-0.460853	0.0676283	-6.8145	9.45928e-12	2.68472e-10	B-cell genes
NEDD4	327.615	-1.09555	0.161186	-6.79682	1.06954e-11	3.02983e-10	stable genes
TUBB6	1092.06	-0.566915	0.0834237	-6.7956	1.0786e-11	3.04974e-10	iMac genes
BRCA2	1031.69	-0.695499	0.102482	-6.78655	1.14849e-11	3.24125e-10	stable genes
ZFP36L2	4228.72	-0.388061	0.0572108	-6.783	1.17702e-11	3.31554e-10	iMac genes
F13A1	51.9143	-2.70373	0.398919	-6.77766	1.2214e-11	3.43409e-10	iMac genes
PTPRF	471.199	-1.64487	0.24297	-6.76987	1.28902e-11	3.61744e-10	B-cell genes
ATP5A1	3923.7	-0.393221	0.0581052	-6.7674	1.31117e-11	3.67274e-10	stable genes
CD86	432.031	0.858047	0.127005	6.75602	1.41836e-11	3.96561e-10	iMac genes
CEP152	838.308	-0.665679	0.0985845	-6.75237	1.45452e-11	4.05914e-10	stable genes
NLRX1	159.898	-1.57607	0.233431	-6.75173	1.46089e-11	4.06936e-10	stable genes
DNPH1	166.006	-1.51238	0.224096	-6.74878	1.49097e-11	4.14546e-10	stable genes
HMMR	670.696	-0.758826	0.112468	-6.74701	1.50923e-11	4.18846e-10	stable genes
ADM2	62.6202	2.51335	0.372806	6.7417	1.56546e-11	4.3365e-10	B-cell genes
RCL1	503.27	0.829567	0.12311	6.73843	1.60106e-11	4.42696e-10	stable genes
CDC20	667.175	-0.771481	0.114503	-6.73764	1.60984e-11	4.43489e-10	B-cell genes
CALM1	3685.87	-0.36211	0.0537424	-6.73789	1.60707e-11	4.43489e-10	stable genes
VPS36	1161.77	-0.568881	0.0844681	-6.73486	1.64087e-11	4.51209e-10	stable genes
CMKLR1	48.1151	-2.7803	0.413541	-6.72316	1.77823e-11	4.88086e-10	iMac genes
DENND4B	1667.21	-0.463116	0.0688958	-6.72198	1.79268e-11	4.91156e-10	iMac genes
HSPA8	10378.5	0.364618	0.0542764	6.7178	1.84483e-11	5.04522e-10	B-cell genes
OLR1	299.929	-1.08375	0.161623	-6.70544	2.00799e-11	5.48144e-10	iMac genes
TENM2	1092.38	0.881574	0.131555	6.7012	2.06712e-11	5.63261e-10	B-cell genes
MTHFD1	1372.82	-0.557856	0.0833402	-6.69373	2.17556e-11	5.91736e-10	B-cell genes
WDR62	590.189	-0.788672	0.118184	-6.67324	2.50217e-11	6.7934e-10	B-cell genes
SLC41A1	640.549	0.722213	0.108331	6.66672	2.6159e-11	7.08937e-10	stable genes
LSM8	1084.47	0.571899	0.0859378	6.6548	2.83691e-11	7.67448e-10	stable genes
HIST1H1E	6133.79	-0.337521	0.0507318	-6.65305	2.87083e-11	7.75228e-10	B-cell genes
GABPB1-AS1	700.411	0.747075	0.112341	6.65008	2.92928e-11	7.89591e-10	iMac genes
IRF1	691.457	-0.718104	0.107994	-6.6495	2.94087e-11	7.91293e-10	stable genes
NOMO1	450.39	0.835288	0.125638	6.64835	2.96402e-11	7.96097e-10	stable genes
PIK3R1	1724.18	-0.46265	0.0696008	-6.64719	2.98735e-11	8.00929e-10	iMac genes
BTAF1	2087.38	-0.4521	0.0680658	-6.6421	3.09241e-11	8.2762e-10	stable genes
CDK1	780.173	-0.719694	0.108393	-6.63965	3.14436e-11	8.40026e-10	B-cell genes
NCOA5	1002.47	0.596792	0.0899147	6.63731	3.19456e-11	8.5192e-10	stable genes
ADCY6	423.312	0.983115	0.148127	6.63696	3.20208e-11	8.52412e-10	B-cell genes
MID1	131.594	-1.84429	0.277945	-6.63543	3.23566e-11	8.59826e-10	B-cell genes
DEF8	207.223	-1.29616	0.195472	-6.6309	3.33637e-11	8.81907e-10	stable genes
EZR	1742.7	0.472827	0.0713038	6.63116	3.3307e-11	8.81907e-10	stable genes
CSPP1	749.421	-0.720846	0.10871	-6.63093	3.33587e-11	8.81907e-10	B-cell genes
PELI2	1142.6	-0.564711	0.0851793	-6.62967	3.36431e-11	8.8773e-10	iMac genes
SLC2A5	353.075	-1.08055	0.162996	-6.62931	3.37254e-11	8.88338e-10	B-cell genes
CCDC71L	324.068	0.998789	0.150753	6.62534	3.46447e-11	9.10956e-10	stable genes
TSPYL2	417.714	0.885625	0.133927	6.61276	3.77219e-11	9.90135e-10	stable genes
MYC	2846.61	0.498653	0.0755822	6.5975	4.18147e-11	1.09565e-09	B-cell genes
WWC3	297.768	1.0137	0.15386	6.58847	4.44379e-11	1.16235e-09	stable genes
CHAF1A	1101.27	-0.612702	0.0931818	-6.57535	4.85402e-11	1.26745e-09	B-cell genes
OSBPL8	3326.71	0.349704	0.0533258	6.55788	5.45789e-11	1.42265e-09	iMac genes
QDPR	147.244	-1.75149	0.26749	-6.54787	5.83623e-11	1.51863e-09	B-cell genes
ADAP1	265.053	-1.10386	0.168636	-6.54579	5.91799e-11	1.53724e-09	iMac genes
AASS	614.768	-0.812726	0.124675	-6.51878	7.08834e-11	1.83807e-09	B-cell genes
KIF20A	657.791	-0.78507	0.12045	-6.51779	7.13512e-11	1.84701e-09	B-cell genes
KLF3	294.626	-1.01336	0.155564	-6.51413	7.31121e-11	1.88934e-09	iMac genes
ARHGAP42	162.79	-1.56594	0.240478	-6.51179	7.4261e-11	1.91573e-09	B-cell genes
PRSS21	121.255	-1.9353	0.297588	-6.5033	7.85794e-11	2.0228e-09	stable genes
EFCAB5	193.066	1.26809	0.194998	6.5031	7.86809e-11	2.0228e-09	iMac genes
PTPRK	396.63	-1.48531	0.22853	-6.49939	8.06453e-11	2.06976e-09	B-cell genes
GUCY1A3	876.566	0.592267	0.0911834	6.49534	8.28449e-11	2.12258e-09	iMac genes
CELSR2	666.345	0.719937	0.110861	6.49402	8.35732e-11	2.13759e-09	B-cell genes
DNMT1	3505.64	-0.385019	0.0593789	-6.4841	8.92622e-11	2.27922e-09	stable genes
CFD	379.678	0.896313	0.138274	6.48215	9.04249e-11	2.30499e-09	iMac genes
KIF4A	628.562	-0.762159	0.117642	-6.47861	9.25685e-11	2.35563e-09	stable genes
SEC14L1	893.649	-0.591925	0.0916616	-6.45772	1.06294e-10	2.70033e-09	iMac genes
PRL	58.7571	-2.38415	0.369367	-6.45468	1.08446e-10	2.75035e-09	iMac genes
DNAJC1	158.617	1.48286	0.22977	6.45368	1.09169e-10	2.76403e-09	stable genes
DEK	3192.14	-0.396193	0.0614549	-6.4469	1.14163e-10	2.88559e-09	stable genes
WDHD1	660.049	-0.77267	0.119916	-6.44344	1.16797e-10	2.94722e-09	B-cell genes
FN1	72364.6	0.704633	0.109414	6.44005	1.19433e-10	3.00866e-09	iMac genes
SP3	2563.57	-0.379666	0.0589725	-6.43802	1.21045e-10	3.04416e-09	stable genes
LTA4H	3433.18	-0.383151	0.0595327	-6.43596	1.22692e-10	3.07864e-09	iMac genes
TSGA10	108.185	1.66142	0.258152	6.4358	1.22826e-10	3.07864e-09	stable genes
USP1	1422.56	-0.516407	0.0802449	-6.43538	1.23161e-10	3.0819e-09	B-cell genes
USP4	2110.47	0.440728	0.0685302	6.43114	1.2665e-10	3.16393e-09	iMac genes
SMC4	4128.86	-0.360463	0.0561135	-6.42381	1.32902e-10	3.31459e-09	stable genes
INPP5E	176.369	-1.40312	0.218437	-6.42343	1.33239e-10	3.31749e-09	stable genes
TRPS1	495.501	-0.762537	0.118719	-6.42304	1.3358e-10	3.32048e-09	iMac genes
IRGQ	807.887	0.62663	0.097627	6.41861	1.37527e-10	3.41295e-09	stable genes
CDCA7	1236.21	-0.581052	0.0905364	-6.41788	1.38188e-10	3.42368e-09	B-cell genes
HNRNPM	3282.75	-0.358985	0.0560317	-6.40683	1.48579e-10	3.67506e-09	B-cell genes
NDUFA6-AS1	38.7387	3.16975	0.495704	6.39443	1.61146e-10	3.97936e-09	stable genes
MTSS1	101.417	-1.67223	0.261582	-6.39278	1.62899e-10	4.01603e-09	iMac genes
TPT1	25591.1	0.232708	0.0364151	6.39042	1.65431e-10	4.07176e-09	iMac genes
YAP1	180.217	3.27603	0.51269	6.38988	1.66016e-10	4.07947e-09	B-cell genes
KCNQ5	784.84	-0.707254	0.110757	-6.38561	1.70711e-10	4.18799e-09	stable genes
EGR2	84.9774	1.89742	0.297161	6.38517	1.71209e-10	4.19336e-09	iMac genes
TFDP2	642.056	-0.733124	0.114852	-6.3832	1.73421e-10	4.24063e-09	stable genes
CRIM1	552.651	-0.74868	0.117485	-6.37253	1.85938e-10	4.53931e-09	iMac genes
LRP6	1091.29	0.597472	0.0938228	6.36808	1.91408e-10	4.66525e-09	B-cell genes
RANBP1	1568.6	-0.506728	0.0795774	-6.36775	1.91826e-10	4.66787e-09	B-cell genes
FBXW7	1394.21	0.543364	0.0853736	6.36454	1.95878e-10	4.75107e-09	B-cell genes
PSAT1	794.247	0.693241	0.10892	6.3647	1.95674e-10	4.75107e-09	B-cell genes
EIF4G3	2324	0.41421	0.0651755	6.35531	2.08012e-10	5.03725e-09	stable genes
ATP6V0E1	456.437	0.793715	0.125002	6.34959	2.15883e-10	5.21942e-09	iMac genes
KIAA1033	3517.2	-0.394627	0.0621969	-6.34481	2.22705e-10	5.36589e-09	iMac genes
FAM214A	352.097	-0.917141	0.144552	-6.34471	2.22842e-10	5.36589e-09	iMac genes
FIRRE	429.923	-1.05959	0.167006	-6.34459	2.23013e-10	5.36589e-09	B-cell genes
CDK5RAP2	1425.72	-0.521437	0.0822231	-6.34173	2.27196e-10	5.4578e-09	B-cell genes
CST7	248.532	-1.11018	0.175285	-6.33357	2.39555e-10	5.7455e-09	iMac genes
THOC1	998.239	0.601298	0.0949604	6.33209	2.41866e-10	5.79166e-09	stable genes
CYP51A1	589.563	-0.75439	0.119146	-6.33165	2.42554e-10	5.7989e-09	stable genes
MEF2D	3160.14	-0.350654	0.0553892	-6.33073	2.44012e-10	5.82447e-09	stable genes
HSPA9	4813.67	-0.323761	0.0512925	-6.31204	2.75377e-10	6.56272e-09	stable genes
SECISBP2L	1221.94	0.522306	0.0827618	6.31096	2.77318e-10	6.5985e-09	iMac genes
ASGR2	494.942	0.75652	0.119977	6.30556	2.8715e-10	6.81086e-09	iMac genes
ID1	296.671	-0.952293	0.151021	-6.30572	2.86857e-10	6.81086e-09	iMac genes
HIST1H3C	386.159	-0.87208	0.13834	-6.30391	2.9023e-10	6.87305e-09	stable genes
ZNF777	316.142	-1.01521	0.161126	-6.30071	2.96291e-10	7.00553e-09	stable genes
CDK2AP1	868.331	0.655835	0.104162	6.29631	3.0482e-10	7.19586e-09	B-cell genes
DENND3	2231.25	-0.420796	0.0668525	-6.29439	3.08614e-10	7.27398e-09	iMac genes
DTL	911.952	-0.674713	0.10723	-6.29219	3.13019e-10	7.36626e-09	B-cell genes
CALB2	94.3915	9.15924	1.45649	6.28856	3.20432e-10	7.52889e-09	stable genes
MAP3K2	2040.1	-0.432229	0.0687356	-6.28829	3.20989e-10	7.53021e-09	iMac genes
NDC1	931.59	-0.612314	0.0973896	-6.28727	3.23106e-10	7.56805e-09	B-cell genes
RABGGTA	336.849	0.899501	0.143257	6.27893	3.40914e-10	7.97272e-09	iMac genes
NDST1	1402.25	0.467413	0.0744454	6.2786	3.41634e-10	7.97712e-09	stable genes
SYNE3	1466.9	-0.492397	0.0784553	-6.27614	3.47079e-10	8.09168e-09	B-cell genes
CXXC5	480.031	-0.83497	0.133286	-6.2645	3.74013e-10	8.70608e-09	stable genes
RASSF3	3186.23	0.355159	0.0567064	6.26311	3.77364e-10	8.77049e-09	iMac genes
TPR	4185.74	0.321425	0.0513476	6.25979	3.85504e-10	8.94584e-09	stable genes
CCNF	695.925	-0.714932	0.114262	-6.25695	3.92585e-10	9.0961e-09	B-cell genes
BCAM	89.1139	1.92825	0.308262	6.25523	3.9694e-10	9.18284e-09	B-cell genes
BTG2	1219.69	-0.529572	0.0846813	-6.2537	4.00841e-10	9.25881e-09	iMac genes
ABCA3	80.0416	2.07603	0.332252	6.24838	4.14725e-10	9.56481e-09	B-cell genes
CBR4	338.524	0.956239	0.153101	6.24581	4.21599e-10	9.70842e-09	stable genes
AKAP12	2643.07	-0.638027	0.102343	-6.23419	4.54128e-10	1.04415e-08	B-cell genes
FANCA	991.974	-0.60873	0.0976665	-6.23274	4.58347e-10	1.05223e-08	B-cell genes
SYNPO	374.622	1.06402	0.170825	6.22873	4.70225e-10	1.07786e-08	B-cell genes
C20orf112	1100.87	-0.548599	0.0881195	-6.22562	4.79648e-10	1.09778e-08	iMac genes
ATP2B4	2671	0.394683	0.0634368	6.22168	4.91858e-10	1.12401e-08	iMac genes
STAT3	1379.21	0.518312	0.0833782	6.2164	5.08693e-10	1.16072e-08	iMac genes
LPGAT1	1244.05	-0.499119	0.080609	-6.19186	5.94598e-10	1.35467e-08	stable genes
CENPU	712.585	-0.694263	0.112139	-6.1911	5.97451e-10	1.35911e-08	B-cell genes
WDR70	420.447	-0.859127	0.138819	-6.18884	6.06078e-10	1.37665e-08	stable genes
ZKSCAN1	2135.37	0.398523	0.0644038	6.18788	6.09798e-10	1.38301e-08	stable genes
CD300LF	206.095	1.14974	0.185981	6.18203	6.32843e-10	1.43311e-08	iMac genes
PFAS	1151.59	-0.54509	0.0882992	-6.17322	6.69133e-10	1.51301e-08	B-cell genes
ARID4A	1032.38	-0.529368	0.0857643	-6.17236	6.72788e-10	1.51898e-08	iMac genes
KPNA2	1940.33	-0.433773	0.0703122	-6.16924	6.86183e-10	1.5469e-08	B-cell genes
BUB3	3192.27	-0.374729	0.0607602	-6.16734	6.94467e-10	1.56323e-08	B-cell genes
MAPK6	798.978	0.597815	0.0969672	6.16513	7.04261e-10	1.5829e-08	stable genes
PXN-AS1	46.4164	2.69923	0.438104	6.16118	7.22052e-10	1.62046e-08	B-cell genes
C3	852.687	0.770606	0.125096	6.16014	7.26787e-10	1.62865e-08	iMac genes
C4orf21	726.305	-0.671199	0.109068	-6.15393	7.55859e-10	1.68876e-08	stable genes
SMC1A	3000.22	-0.359144	0.0583579	-6.15416	7.54774e-10	1.68876e-08	stable genes
CKAP2L	478.498	-0.807705	0.131308	-6.15122	7.68905e-10	1.71536e-08	stable genes
DYNC1H1	7084.34	-0.281218	0.0457238	-6.15036	7.73069e-10	1.72209e-08	stable genes
ARHGAP26	3228.44	0.700838	0.114134	6.14048	8.22737e-10	1.83001e-08	iMac genes
PGD	3492.34	-0.3346	0.0545167	-6.13756	8.37983e-10	1.86116e-08	iMac genes
IL31RA	66.0041	2.0245	0.330012	6.13463	8.53601e-10	1.89305e-08	iMac genes
ANO5	441.051	0.805139	0.131281	6.13293	8.62732e-10	1.91048e-08	iMac genes
AADAT	180.801	-2.59993	0.424002	-6.13189	8.68436e-10	1.92028e-08	B-cell genes
MCM5	1498.37	-0.479325	0.0781775	-6.13125	8.71925e-10	1.92516e-08	stable genes
KCNS3	184.431	1.55804	0.254155	6.13026	8.77364e-10	1.93432e-08	B-cell genes
LSP1	816.058	0.602018	0.0982448	6.12773	8.91417e-10	1.96242e-08	iMac genes
RBL1	842.695	-0.593299	0.0968443	-6.12632	8.99353e-10	1.977e-08	stable genes
PIK3R2	742.623	0.61352	0.100226	6.12139	9.27644e-10	2.03621e-08	stable genes
PLK1	940.114	-0.639131	0.104446	-6.11924	9.4023e-10	2.06082e-08	B-cell genes
SLC38A5	377.437	-1.00004	0.163516	-6.11582	9.60595e-10	2.10239e-08	B-cell genes
HCK	1567.05	-0.443133	0.0724772	-6.11409	9.71067e-10	2.12221e-08	iMac genes
SLC9A3R1	1908.69	0.417206	0.0682639	6.11167	9.8593e-10	2.15156e-08	iMac genes
LAMP3	401.375	2.92445	0.478567	6.11084	9.91061e-10	2.15962e-08	B-cell genes
ARHGAP31	84.2033	-1.80463	0.295924	-6.09831	1.07197e-09	2.33254e-08	iMac genes
FLT1	63.1303	2.15941	0.354155	6.09734	1.07848e-09	2.34332e-08	stable genes
SLC38A1	4889.88	-0.319022	0.0523461	-6.09447	1.09803e-09	2.38235e-08	B-cell genes
ZNRF1	305.073	-1.08454	0.177984	-6.0935	1.10466e-09	2.39327e-08	B-cell genes
GUCD1	1150.33	0.503462	0.0827813	6.08183	1.18816e-09	2.57046e-08	stable genes
ESPL1	700.048	-0.702497	0.115593	-6.07733	1.22197e-09	2.63981e-08	stable genes
TBC1D4	1118.05	0.539174	0.0887733	6.07361	1.25069e-09	2.69797e-08	B-cell genes
VWCE	710.71	-0.634775	0.104519	-6.07333	1.25287e-09	2.69879e-08	stable genes
LPIN1	743.352	0.615139	0.101328	6.07079	1.27285e-09	2.73791e-08	stable genes
UNKL	557.831	-0.690148	0.113858	-6.06149	1.34864e-09	2.89679e-08	iMac genes
AEBP1	1249.72	-0.593038	0.0980911	-6.04578	1.48686e-09	3.1891e-08	B-cell genes
GPR114	59.6016	2.11046	0.34916	6.04439	1.49972e-09	3.21209e-08	iMac genes
PPM1H	87.9867	-2.18608	0.361708	-6.04376	1.50563e-09	3.21736e-08	stable genes
CLOCK	725.676	0.600551	0.0993686	6.04367	1.50646e-09	3.21736e-08	stable genes
FCHSD2	1549.88	0.438336	0.0726133	6.03657	1.57421e-09	3.35728e-08	iMac genes
MLLT4	1961.77	-0.417978	0.0693098	-6.03058	1.63374e-09	3.47928e-08	stable genes
NUMB	1896.5	-0.422986	0.0701483	-6.02989	1.64075e-09	3.48927e-08	iMac genes
SKIL	1888.34	-0.409468	0.0679218	-6.02852	1.6547e-09	3.51395e-08	iMac genes
SMIM3	418.352	0.775079	0.128627	6.02578	1.68299e-09	3.56899e-08	iMac genes
C1orf21	311.057	0.922689	0.153284	6.01949	1.74966e-09	3.70514e-08	iMac genes
KIAA1549	180.739	-1.44707	0.240434	-6.01858	1.75949e-09	3.72071e-08	B-cell genes
ZMAT3	1967.38	0.385982	0.064149	6.01697	1.77717e-09	3.75281e-08	iMac genes
ANO6	1162.37	-0.487398	0.081054	-6.01325	1.81846e-09	3.83459e-08	iMac genes
KIFC1	827.289	-0.634294	0.105686	-6.00166	1.95307e-09	4.11267e-08	B-cell genes
FYCO1	953.337	0.559811	0.0933236	5.99861	1.99018e-09	4.18494e-08	iMac genes
CDCA8	586.904	-0.749599	0.125103	-5.99185	2.07464e-09	4.35645e-08	B-cell genes
COCH	653.276	-0.713926	0.119183	-5.99016	2.09635e-09	4.3959e-08	B-cell genes
LILRA5	268.075	0.945475	0.157959	5.98558	2.15614e-09	4.51496e-08	iMac genes
STK39	1189.21	0.558039	0.0932446	5.98468	2.16814e-09	4.53378e-08	B-cell genes
PPIA	4047.9	-0.35216	0.0588846	-5.98051	2.22439e-09	4.64493e-08	stable genes
ARHGEF17	212.545	1.09254	0.182717	5.97941	2.2395e-09	4.66997e-08	iMac genes
ABCA10	48.3228	2.45973	0.411534	5.97696	2.27335e-09	4.734e-08	stable genes
CCNG2	952.047	-0.532183	0.0891398	-5.97021	2.36944e-09	4.92726e-08	iMac genes
GALNT14	858.679	-0.586969	0.0984053	-5.96481	2.44917e-09	5.08601e-08	stable genes
NFKBIZ	1669.81	0.412216	0.069139	5.96214	2.48956e-09	5.16273e-08	iMac genes
NCOA3	2214.41	0.380658	0.0638889	5.95812	2.55161e-09	5.28412e-08	iMac genes
ZC3H12C	259.098	-1.10363	0.18525	-5.95752	2.56087e-09	5.29599e-08	B-cell genes
TEP1	974.799	0.539313	0.0905792	5.95405	2.61594e-09	5.39706e-08	stable genes
CAP2	159.118	-1.34532	0.225953	-5.95398	2.61693e-09	5.39706e-08	stable genes
CHST6	642.114	-1.65627	0.278308	-5.95122	2.66149e-09	5.48143e-08	B-cell genes
TMEM2	410.838	0.811546	0.136384	5.95045	2.67399e-09	5.49962e-08	stable genes
KIAA1524	863.218	-0.574884	0.0967264	-5.94341	2.79161e-09	5.73369e-08	stable genes
DIAPH3	477.528	-0.866193	0.145817	-5.94029	2.84522e-09	5.83581e-08	B-cell genes
CALHM2	529.687	-0.721327	0.121437	-5.93992	2.85158e-09	5.84087e-08	iMac genes
PRDX5	467.143	0.749269	0.126151	5.93946	2.85957e-09	5.84926e-08	stable genes
MYH9	30095.8	0.216327	0.036453	5.93441	2.94903e-09	6.02405e-08	iMac genes
ZCCHC24	405.319	0.782869	0.131977	5.93184	2.99558e-09	6.11083e-08	iMac genes
BNIP3L	1306.33	-0.599979	0.101203	-5.92848	3.05743e-09	6.22853e-08	iMac genes
PLK4	623.378	-0.706907	0.119258	-5.92757	3.07447e-09	6.25475e-08	B-cell genes
CLK1	1448.13	-0.45384	0.0767371	-5.91422	3.33444e-09	6.77446e-08	iMac genes
MESDC1	528.172	0.686542	0.116108	5.91296	3.36004e-09	6.81725e-08	stable genes
MAN1A2	1452.47	0.439166	0.0742965	5.911	3.40043e-09	6.88989e-08	iMac genes
RFWD3	1545.55	-0.464937	0.0786747	-5.90962	3.42906e-09	6.93854e-08	B-cell genes
FFAR2	65.7825	1.95478	0.331199	5.90213	3.58846e-09	7.25129e-08	iMac genes
GPR98	112.671	-1.46313	0.248038	-5.8988	3.66163e-09	7.3892e-08	iMac genes
SLC29A1	398.339	-0.880056	0.149284	-5.89517	3.74302e-09	7.54332e-08	B-cell genes
SPATA13	1000.65	-0.506119	0.0858601	-5.89469	3.75393e-09	7.55517e-08	iMac genes
RANGAP1	1229.11	-0.479081	0.0813347	-5.89024	3.8564e-09	7.75101e-08	stable genes
COL24A1	40.6782	2.58669	0.439425	5.88653	3.94397e-09	7.91641e-08	iMac genes
RBBP6	2293.47	0.383655	0.0652559	5.87924	4.12146e-09	8.26162e-08	stable genes
ZNF558	312.396	0.8775	0.149274	5.87847	4.14085e-09	8.28943e-08	iMac genes
CD163L1	142.654	1.31472	0.223672	5.87789	4.15526e-09	8.30721e-08	stable genes
CD300C	260.241	0.975931	0.166217	5.87142	4.32083e-09	8.62672e-08	iMac genes
VPS13D	2256.35	0.357988	0.0609741	5.87114	4.32799e-09	8.62953e-08	stable genes
LYL1	551.036	-0.670336	0.114285	-5.86545	4.47909e-09	8.91897e-08	iMac genes
PPM1L	352.81	0.856385	0.14602	5.86484	4.49572e-09	8.94023e-08	stable genes
HAUS6	1014.09	-0.544519	0.092922	-5.85996	4.62979e-09	9.19466e-08	stable genes
AP1G2	1030.76	0.495196	0.0846151	5.85233	4.84728e-09	9.61387e-08	stable genes
RP11-346I3.4	68.2062	2.00118	0.342075	5.85013	4.9118e-09	9.72899e-08	iMac genes
LMNB2	1847.03	-0.42618	0.0728692	-5.84856	4.95842e-09	9.8084e-08	B-cell genes
MCU	483.633	0.730326	0.124895	5.84752	4.98962e-09	9.85712e-08	stable genes
MCF2L2	79.3606	1.87073	0.320003	5.84596	5.03667e-09	9.937e-08	stable genes
H2AFX	1848.43	-0.448587	0.076798	-5.84113	5.1849e-09	1.0216e-07	B-cell genes
UTRN	3743.45	-0.341403	0.0584613	-5.83981	5.22613e-09	1.02838e-07	stable genes
DAB2IP	170.649	-1.29975	0.222736	-5.83536	5.36742e-09	1.0548e-07	stable genes
STRAP	1317.93	0.46262	0.0793434	5.8306	5.52269e-09	1.08389e-07	B-cell genes
PHF19	521.628	-0.709526	0.121762	-5.82713	5.6388e-09	1.10523e-07	stable genes
AKAP13	6722.93	0.262474	0.0450544	5.82571	5.6871e-09	1.11325e-07	iMac genes
ANKRD22	165.129	1.19511	0.205202	5.82408	5.74278e-09	1.12268e-07	iMac genes
F5	545.508	0.699659	0.120165	5.82247	5.79856e-09	1.13211e-07	iMac genes
DDX18	1187.17	-0.522319	0.089761	-5.819	5.92017e-09	1.15436e-07	B-cell genes
TYSND1	241.897	1.00589	0.172958	5.81581	6.03408e-09	1.17504e-07	stable genes
PFKFB3	1590.17	-0.440843	0.0759009	-5.80814	6.31723e-09	1.22859e-07	iMac genes
B3GALTL	174.023	-1.2154	0.209314	-5.8066	6.37524e-09	1.23826e-07	stable genes
HYDIN	50.3227	2.40062	0.413693	5.80289	6.51807e-09	1.26437e-07	iMac genes
PTPN22	623.37	0.612076	0.105483	5.80258	6.53021e-09	1.26509e-07	iMac genes
LILRA2	822.512	0.559132	0.0964302	5.79831	6.69865e-09	1.29605e-07	iMac genes
LGR4	370.327	-0.84318	0.145436	-5.79762	6.72637e-09	1.29974e-07	iMac genes
RDH10	138.784	1.44612	0.249509	5.79586	6.79702e-09	1.3117e-07	stable genes
FANCD2	1019.68	-0.529367	0.0913541	-5.79468	6.84521e-09	1.31931e-07	B-cell genes
CMTR2	401.6	0.77448	0.133721	5.79175	6.96582e-09	1.34083e-07	stable genes
DNAJA1	1703.99	0.461628	0.0797219	5.79048	7.01838e-09	1.34922e-07	B-cell genes
RHOT1	792.142	0.563204	0.0972693	5.79015	7.03237e-09	1.35018e-07	iMac genes
ANXA2	4109.29	-0.283643	0.0490239	-5.7858	7.21682e-09	1.38382e-07	iMac genes
ANP32B	2338.54	-0.368304	0.063687	-5.78302	7.33692e-09	1.40506e-07	B-cell genes
LOC100507217	848.889	-0.548373	0.0948432	-5.78189	7.38657e-09	1.41276e-07	iMac genes
LDHB	4219.47	-0.330569	0.0571918	-5.78	7.46993e-09	1.42689e-07	B-cell genes
SIGLEC10	138.259	1.39679	0.241749	5.77787	7.56534e-09	1.44328e-07	B-cell genes
UFM1	730.819	0.584258	0.101144	5.77649	7.62756e-09	1.4533e-07	stable genes
PRR11	1050.67	-0.575291	0.0996465	-5.77332	7.77259e-09	1.47906e-07	B-cell genes
CKAP4	1826.28	-0.40148	0.0695839	-5.76972	7.94024e-09	1.50905e-07	iMac genes
FLNA	15537	-0.231584	0.040186	-5.76279	8.27356e-09	1.57041e-07	iMac genes
GNPTAB	2393.71	0.343929	0.0597098	5.76001	8.41087e-09	1.59446e-07	iMac genes
BMP2	106.507	1.66013	0.28824	5.75956	8.43341e-09	1.59671e-07	B-cell genes
C4orf46	589.969	0.675541	0.117465	5.75098	8.87264e-09	1.67776e-07	B-cell genes
DET1	160.213	-1.22208	0.21256	-5.74935	8.95864e-09	1.69189e-07	stable genes
ASNS	430.823	0.83158	0.144678	5.74778	9.04242e-09	1.70556e-07	B-cell genes
USP22	5221.22	0.31516	0.0548491	5.74596	9.14028e-09	1.72186e-07	stable genes
INPPL1	2457.01	0.361349	0.0629131	5.74363	9.267e-09	1.74354e-07	stable genes
MTHFD1L	1012.18	-0.516288	0.0900155	-5.73555	9.71974e-09	1.82644e-07	stable genes
PRC1	1092.87	-0.534682	0.0933273	-5.72911	1.00962e-08	1.8948e-07	stable genes
CNR2	327.074	0.833283	0.145634	5.72175	1.0543e-08	1.9762e-07	iMac genes
REV3L	2267.48	-0.411464	0.071915	-5.72152	1.05572e-08	1.97639e-07	iMac genes
MMS22L	842.765	-0.591964	0.103494	-5.71977	1.06668e-08	1.99441e-07	B-cell genes
GLRX	861.537	-0.534077	0.0934185	-5.71703	1.084e-08	2.02427e-07	iMac genes
ZNF827	437.593	-0.802916	0.140493	-5.71499	1.0971e-08	2.0462e-07	B-cell genes
ALDH2	201.04	-1.07295	0.187768	-5.71422	1.10206e-08	2.0529e-07	iMac genes
ACKR3	222.579	-0.992889	0.173773	-5.7137	1.10546e-08	2.05668e-07	iMac genes
CSMD1	494.823	1.64017	0.287119	5.71252	1.11312e-08	2.06837e-07	B-cell genes
BAI3	55.6922	2.05516	0.359993	5.70887	1.13728e-08	2.11065e-07	stable genes
SLC46A1	262.653	0.927714	0.162526	5.70811	1.1424e-08	2.11753e-07	iMac genes
PEG10	382.859	-2.864	0.501853	-5.70685	1.15087e-08	2.13059e-07	B-cell genes
ALOX5AP	3381.99	0.327179	0.057382	5.70177	1.18567e-08	2.19232e-07	iMac genes
RNF26	375.086	-0.822267	0.14452	-5.68965	1.27298e-08	2.34797e-07	stable genes
IKZF2	907.133	-0.764939	0.13444	-5.68982	1.27173e-08	2.34797e-07	B-cell genes
NUP107	871.762	-0.574733	0.10102	-5.68927	1.27584e-08	2.35037e-07	B-cell genes
HP1BP3	3521.57	-0.304955	0.053611	-5.6883	1.28312e-08	2.36087e-07	stable genes
AURKB	623.184	-0.667059	0.117365	-5.68364	1.31854e-08	2.42308e-07	B-cell genes
EPDR1	161.246	-1.29056	0.227356	-5.67642	1.37547e-08	2.5246e-07	stable genes
MIRLET7BHG	199.375	-1.09554	0.193198	-5.67052	1.42367e-08	2.60988e-07	stable genes
ANKRD13D	903.44	0.512725	0.090428	5.66999	1.42809e-08	2.61304e-07	iMac genes
INTS1	1900.73	-0.405534	0.0715241	-5.66989	1.42887e-08	2.61304e-07	stable genes
TPGS2	829.478	-0.58562	0.103334	-5.66726	1.451e-08	2.65027e-07	B-cell genes
TGFBR2	1819.67	0.394448	0.0696236	5.66543	1.46655e-08	2.67543e-07	stable genes
TATDN2	1419.48	0.428818	0.0758243	5.65541	1.55474e-08	2.83287e-07	stable genes
CNST	475.408	0.692035	0.122397	5.65401	1.56743e-08	2.85254e-07	stable genes
LPCAT3	638.766	0.621671	0.11003	5.65003	1.60422e-08	2.91596e-07	stable genes
MXD1	803.521	-0.535373	0.0947748	-5.64889	1.61486e-08	2.93143e-07	iMac genes
HNRNPDL	4960.03	-0.286763	0.0507662	-5.6487	1.61664e-08	2.93143e-07	stable genes
RACGAP1	857.254	-0.550564	0.0975099	-5.64624	1.63997e-08	2.97014e-07	stable genes
RRM1	1156.27	-0.521711	0.0925139	-5.63927	1.70772e-08	3.08912e-07	B-cell genes
OAT	416.05	0.753296	0.1336	5.63846	1.71577e-08	3.09995e-07	stable genes
CHD7	4841.62	-0.294379	0.0522186	-5.63744	1.72602e-08	3.11471e-07	stable genes
RP4-684O24.5	23.208	3.87692	0.688552	5.63053	1.79655e-08	3.2381e-07	iMac genes
FIGNL2	49.8825	2.17759	0.386966	5.62734	1.83009e-08	3.29461e-07	stable genes
MMAA	143.341	1.35386	0.24079	5.62256	1.88151e-08	3.38311e-07	B-cell genes
NOG	304.941	-1.07923	0.192161	-5.61628	1.95112e-08	3.50408e-07	B-cell genes
GATA6	161.375	1.23391	0.21986	5.61228	1.99677e-08	3.58177e-07	B-cell genes
ATP5B	5450.51	-0.282988	0.0504695	-5.60711	2.05731e-08	3.68598e-07	stable genes
SMOX	345.053	0.778393	0.139022	5.59905	2.15535e-08	3.85702e-07	iMac genes
SEMA6B	75.7511	1.7958	0.321183	5.59121	2.25496e-08	4.03047e-07	stable genes
KIF3C	503.504	0.680779	0.121772	5.59061	2.26277e-08	4.03962e-07	stable genes
CHD9	3154.98	0.319993	0.057303	5.58423	2.34739e-08	4.18572e-07	stable genes
TFE3	696.066	0.554875	0.0993861	5.58303	2.36367e-08	4.20974e-07	iMac genes
AAAS	341.282	-0.930005	0.166627	-5.58135	2.38661e-08	4.24556e-07	B-cell genes
KIF21B	1336.14	-0.439408	0.0787597	-5.57909	2.41775e-08	4.29587e-07	stable genes
EFCAB2	321.616	-0.850076	0.152478	-5.57508	2.47421e-08	4.39099e-07	stable genes
BIRC2	531.845	0.653967	0.117322	5.57412	2.48787e-08	4.41001e-07	iMac genes
RBM45	88.3585	-1.84502	0.331148	-5.57158	2.5244e-08	4.4695e-07	stable genes
RAD54L	535.514	-0.70817	0.127126	-5.57063	2.53816e-08	4.48856e-07	B-cell genes
FBXO30	912.763	0.490524	0.0881497	5.56468	2.62638e-08	4.63912e-07	iMac genes
SEMA4F	82.7198	1.83499	0.329936	5.56165	2.67241e-08	4.71487e-07	B-cell genes
ENO1	13397.6	-0.280709	0.0504968	-5.55896	2.71394e-08	4.78252e-07	stable genes
SMAD7	357.548	-0.773735	0.139262	-5.55595	2.76105e-08	4.85984e-07	iMac genes
SNHG7	510.528	-0.695361	0.125219	-5.55318	2.80518e-08	4.93173e-07	stable genes
FAM117B	343.639	-0.857961	0.154531	-5.55202	2.82382e-08	4.9587e-07	B-cell genes
SPATA5	374.648	-0.934405	0.168372	-5.54964	2.86262e-08	5.02096e-07	B-cell genes
PDE4D	723.973	-0.632131	0.11394	-5.54794	2.89049e-08	5.06392e-07	stable genes
TMPO-AS1	338.871	-0.930398	0.167724	-5.54721	2.90262e-08	5.07924e-07	iMac genes
MCM10	731.25	-0.645467	0.11638	-5.54621	2.91932e-08	5.10252e-07	B-cell genes
FRAT1	774.2	0.532529	0.0960998	5.54142	3.00036e-08	5.23806e-07	iMac genes
ACLY	3470.72	-0.345089	0.0622929	-5.53978	3.02848e-08	5.27489e-07	B-cell genes
PCNA	1593.32	-0.434738	0.0784739	-5.5399	3.02637e-08	5.27489e-07	B-cell genes
NBR1	802.097	0.564435	0.101943	5.53679	3.08072e-08	5.35968e-07	stable genes
ZC3H7A	909.454	-0.51682	0.0933816	-5.53449	3.12132e-08	5.42402e-07	stable genes
FKBP5	1994.23	-0.387386	0.070007	-5.53354	3.1384e-08	5.44739e-07	stable genes
SLC25A45	70.0358	1.8586	0.335898	5.53325	3.14359e-08	5.4501e-07	B-cell genes
CDT1	699.408	-0.665685	0.12041	-5.52848	3.23022e-08	5.59384e-07	B-cell genes
PREX1	1898.03	0.401047	0.0726005	5.52403	3.31316e-08	5.73084e-07	iMac genes
ADRB2	542.904	0.626884	0.1135	5.52323	3.32819e-08	5.75023e-07	iMac genes
CHML	1199.43	-0.493515	0.0893925	-5.52077	3.37524e-08	5.82481e-07	B-cell genes
PFN2	251.208	1.10879	0.20092	5.51857	3.41764e-08	5.89121e-07	B-cell genes
SHROOM3	338.603	-0.840823	0.152399	-5.51723	3.44384e-08	5.92957e-07	stable genes
COG8	244.586	0.956999	0.173518	5.51526	3.48258e-08	5.9894e-07	stable genes
NCF1B	434.59	0.785813	0.14261	5.51022	3.58381e-08	6.15645e-07	iMac genes
SEMA6C	566.838	0.722727	0.131252	5.50642	3.66212e-08	6.28379e-07	B-cell genes
KIF23	652.375	-0.633036	0.115041	-5.50272	3.73983e-08	6.40249e-07	B-cell genes
GNB4	1678.21	-0.395423	0.0718589	-5.50277	3.73862e-08	6.40249e-07	stable genes
TK1	442.155	-0.787641	0.143146	-5.50235	3.74758e-08	6.40844e-07	B-cell genes
PTPRG	3312.44	-0.33112	0.0601843	-5.50176	3.76017e-08	6.42266e-07	iMac genes
LSAMP	53.076	-4.50213	0.818394	-5.50117	3.77271e-08	6.43676e-07	B-cell genes
NFKB1	1037.05	0.485528	0.0883175	5.49753	3.85143e-08	6.56361e-07	stable genes
RPL36	3759.3	-0.326084	0.0593249	-5.49658	3.8722e-08	6.5909e-07	stable genes
BST2	509.236	0.652565	0.118726	5.4964	3.87622e-08	6.5909e-07	iMac genes
FLI1	4211.8	-0.291032	0.0529625	-5.49506	3.90582e-08	6.63372e-07	stable genes
NDC80	444.141	-0.80452	0.146433	-5.49411	3.92686e-08	6.6619e-07	stable genes
HDGF	4585.23	-0.286491	0.0522053	-5.48777	4.07047e-08	6.89775e-07	B-cell genes
STARD9	681.584	-0.63576	0.115886	-5.4861	4.10905e-08	6.95527e-07	B-cell genes
ARRDC2	504.108	-0.698541	0.127383	-5.4838	4.16278e-08	7.03829e-07	iMac genes
CDC45	402.763	-0.86658	0.158064	-5.48245	4.19486e-08	7.08455e-07	B-cell genes
KANSL1	1711.28	-0.391008	0.0713756	-5.47817	4.29753e-08	7.24979e-07	stable genes
TMEM159	98.8493	1.51003	0.275923	5.47265	4.43356e-08	7.47087e-07	stable genes
PLD3	696.099	0.575267	0.10518	5.46937	4.51629e-08	7.60174e-07	iMac genes
LRP5L	347.011	-0.774185	0.141672	-5.46464	4.63852e-08	7.79873e-07	iMac genes
NR2C2	1395.46	-0.419379	0.0767526	-5.46403	4.65432e-08	7.81655e-07	stable genes
MYD88	1668.12	0.403292	0.0738218	5.46305	4.68015e-08	7.85115e-07	iMac genes
CSGALNACT2	2048.65	-0.370123	0.0677753	-5.46103	4.73386e-08	7.93239e-07	iMac genes
GK	1018.2	0.522378	0.0956616	5.46069	4.74299e-08	7.93883e-07	iMac genes
CTSH	530.651	-0.681661	0.12484	-5.46029	4.75367e-08	7.94784e-07	iMac genes
CTNNAL1	373.659	0.939024	0.17202	5.45881	4.79348e-08	8.00548e-07	B-cell genes
TMEM170B	1113.64	-0.454865	0.0833345	-5.4583	4.80705e-08	8.01923e-07	iMac genes
CIPC	276.356	0.900312	0.164999	5.45649	4.85648e-08	8.0927e-07	B-cell genes
GPX3	38.4802	2.46193	0.451855	5.4485	5.07957e-08	8.45507e-07	stable genes
TIMELESS	795.281	-0.569105	0.104488	-5.44659	5.13452e-08	8.53707e-07	B-cell genes
ERN1	426.735	0.692832	0.127236	5.44526	5.17291e-08	8.59139e-07	iMac genes
NT5DC2	1305.12	-0.440681	0.0809365	-5.44478	5.18705e-08	8.60534e-07	stable genes
LOC730101	265.029	1.0113	0.185752	5.44434	5.19984e-08	8.61704e-07	B-cell genes
RNPEPL1	553.406	-0.635777	0.116791	-5.44371	5.21827e-08	8.63804e-07	stable genes
DOCK7	1016.49	0.514125	0.0946199	5.43358	5.52346e-08	9.13317e-07	stable genes
ZNF212	177.307	-1.13028	0.208128	-5.43067	5.61416e-08	9.27293e-07	stable genes
LGMN	287.671	-0.894935	0.164866	-5.42826	5.6907e-08	9.38903e-07	iMac genes
ARHGAP21	1562.06	-0.405261	0.0746716	-5.42724	5.7232e-08	9.43228e-07	iMac genes
TMX4	1778.74	0.386349	0.0712202	5.4247	5.80505e-08	9.55669e-07	iMac genes
ERF	929.282	-0.496991	0.0916441	-5.42305	5.85893e-08	9.63483e-07	iMac genes
DENND4A	1120.17	-0.472308	0.0871094	-5.422	5.89349e-08	9.68105e-07	iMac genes
TOP2B	20773	-0.217468	0.0401111	-5.42163	5.90571e-08	9.69052e-07	B-cell genes
PRICKLE1	53.9645	-2.52874	0.466776	-5.41745	6.04548e-08	9.90904e-07	stable genes
ANP32A	2872.96	-0.343328	0.0633857	-5.41648	6.07823e-08	9.95186e-07	stable genes
C1orf145	79.351	1.62162	0.299475	5.41489	6.13278e-08	1.00302e-06	stable genes
ZBTB2	458.551	-0.689747	0.127412	-5.4135	6.18039e-08	1.00971e-06	stable genes
ZNF469	262.384	0.889929	0.164425	5.41236	6.21987e-08	1.01506e-06	iMac genes
DTD1	182.149	1.17371	0.217082	5.40676	6.41751e-08	1.04617e-06	B-cell genes
CTDSPL2	1269.91	-0.445532	0.0824686	-5.40245	6.57372e-08	1.07048e-06	stable genes
PRPS2	1016.61	0.469907	0.0870165	5.40021	6.6563e-08	1.08275e-06	stable genes
CEBPB	898.045	-0.490017	0.0908633	-5.39291	6.93267e-08	1.12648e-06	iMac genes
MIPEP	77.1979	-1.99269	0.369555	-5.39214	6.96226e-08	1.13007e-06	B-cell genes
DENND4C	1479.74	0.417818	0.0776026	5.38407	7.28208e-08	1.1807e-06	iMac genes
UGT8	154.076	-1.50851	0.280201	-5.38369	7.2976e-08	1.18194e-06	B-cell genes
SLC19A2	154.753	1.19392	0.221866	5.38127	7.39603e-08	1.1966e-06	B-cell genes
GSAP	279.741	-0.836387	0.155562	-5.37654	7.59311e-08	1.22716e-06	iMac genes
RASA1	930.432	0.483211	0.0898961	5.37522	7.64901e-08	1.23486e-06	stable genes
APBA2	385.235	-0.785104	0.146073	-5.37475	7.66895e-08	1.23675e-06	stable genes
CNKSR2	132.624	1.56295	0.290844	5.37385	7.70727e-08	1.2416e-06	B-cell genes
APBA1	1656.1	-1.23539	0.229928	-5.37295	7.7458e-08	1.24647e-06	B-cell genes
LRRC37A4P	440.228	-0.737407	0.137251	-5.37271	7.75623e-08	1.24681e-06	stable genes
SLC6A9	61.796	2.28035	0.424853	5.36739	7.98841e-08	1.28276e-06	B-cell genes
MATR3	5837.4	-0.263915	0.0491751	-5.36683	8.01317e-08	1.28536e-06	stable genes
MED23	649.515	-0.572216	0.106628	-5.36647	8.02934e-08	1.28658e-06	stable genes
ZNF462	361.027	-0.925305	0.172491	-5.36435	8.12414e-08	1.30038e-06	B-cell genes
ATP13A2	570.426	0.602705	0.112392	5.36251	8.20719e-08	1.31228e-06	stable genes
DGAT1	326.71	0.784515	0.146546	5.35336	8.63359e-08	1.37899e-06	stable genes
BIN2	1016.98	0.464366	0.086762	5.35218	8.69029e-08	1.38657e-06	iMac genes
HIST1H3A	483.204	-0.757972	0.141667	-5.35039	8.77639e-08	1.39882e-06	B-cell genes
NMD3	739.796	0.546751	0.102261	5.34662	8.9613e-08	1.42678e-06	stable genes
H1FX	1098.59	-0.572028	0.107136	-5.33929	9.33107e-08	1.48407e-06	stable genes
LILRB2	814.909	0.548844	0.1028	5.33892	9.34998e-08	1.48551e-06	iMac genes
ZDBF2	256.471	0.919745	0.172391	5.33523	9.54243e-08	1.51448e-06	B-cell genes
ZCCHC6	1540.03	-0.37953	0.0711657	-5.33305	9.65755e-08	1.53113e-06	iMac genes
CLEC12A	1461.64	-0.402354	0.0754573	-5.3322	9.70279e-08	1.53668e-06	iMac genes
CCDC88A	7428.14	-0.249642	0.0468329	-5.33048	9.79532e-08	1.5497e-06	iMac genes
MED12L	155.846	-1.30846	0.24557	-5.32825	9.9166e-08	1.56724e-06	B-cell genes
EZH2	1313.55	-0.448751	0.0842698	-5.32517	1.00856e-07	1.59227e-06	B-cell genes
VPS13B	6000.14	-0.272511	0.0511839	-5.32416	1.01422e-07	1.59953e-06	B-cell genes
GCH1	256.071	-0.90029	0.169289	-5.31805	1.04883e-07	1.64892e-06	iMac genes
BARD1	592.371	-0.635015	0.119407	-5.31805	1.04883e-07	1.64892e-06	B-cell genes
GTSE1	649.294	-0.672206	0.126396	-5.31824	1.04777e-07	1.64892e-06	B-cell genes
FAM107B	4263.4	0.280127	0.0526795	5.31758	1.05157e-07	1.6515e-06	iMac genes
ANKRD6	59.6227	1.89112	0.35565	5.31737	1.05281e-07	1.65171e-06	stable genes
TMBIM4	526.242	0.644269	0.121222	5.31477	1.06792e-07	1.67368e-06	iMac genes
MICU1	492.36	0.64326	0.121049	5.31406	1.07211e-07	1.67848e-06	stable genes
FAM102B	913.7	0.494736	0.0931559	5.31084	1.09123e-07	1.70663e-06	iMac genes
TMEM97	483.096	-0.865359	0.163008	-5.3087	1.10413e-07	1.72501e-06	B-cell genes
PLS3	6275.81	0.389042	0.0732923	5.30809	1.10782e-07	1.72898e-06	B-cell genes
KLHL6	960.19	0.468659	0.0883805	5.30274	1.14075e-07	1.77853e-06	iMac genes
MLC1	248.637	-0.865102	0.163218	-5.3003	1.15612e-07	1.80062e-06	iMac genes
AKR1B1	957.776	-0.57846	0.10915	-5.2997	1.15994e-07	1.8047e-06	B-cell genes
ULK3	351.754	0.73868	0.139398	5.29908	1.16388e-07	1.80895e-06	stable genes
AARS2	487.697	-0.681381	0.128609	-5.2981	1.17014e-07	1.8168e-06	B-cell genes
NCF4	989.699	0.534592	0.100928	5.29674	1.17886e-07	1.82845e-06	B-cell genes
PRKRIR	692.776	-0.572017	0.108069	-5.29306	1.20288e-07	1.86378e-06	stable genes
ZNF398	524.112	-0.668413	0.126357	-5.28986	1.22407e-07	1.89467e-06	stable genes
ALMS1	1745.31	-0.409745	0.0775359	-5.28459	1.2599e-07	1.94811e-06	stable genes
ARHGEF1	2335.38	0.326275	0.0617566	5.28324	1.2692e-07	1.96047e-06	iMac genes
CYTH4	366.298	-0.724833	0.137237	-5.28162	1.28045e-07	1.97581e-06	iMac genes
PKMYT1	366.346	-0.859157	0.162818	-5.27678	1.31473e-07	2.02663e-06	B-cell genes
S100A4	1260.89	0.421231	0.0798622	5.27447	1.33142e-07	2.05024e-06	iMac genes
WDR6	1779.79	0.366052	0.0694048	5.27417	1.33362e-07	2.05153e-06	stable genes
HIP1R	788.358	0.705926	0.133871	5.27317	1.34088e-07	2.06059e-06	B-cell genes
COPG1	1498.65	0.395702	0.0750657	5.2714	1.35386e-07	2.07841e-06	stable genes
XBP1	2263.18	0.317735	0.0603421	5.26556	1.39759e-07	2.14336e-06	iMac genes
TUBB4B	2532.49	-0.344049	0.065366	-5.26342	1.41401e-07	2.16632e-06	stable genes
WDR77	610.843	0.610094	0.115935	5.26237	1.42213e-07	2.17654e-06	B-cell genes
RTTN	614.983	-0.605704	0.115173	-5.25908	1.44774e-07	2.21348e-06	stable genes
UPP1	287.036	0.847087	0.161142	5.25676	1.46613e-07	2.23932e-06	iMac genes
EXO1	513.483	-0.765808	0.145692	-5.25635	1.46945e-07	2.24211e-06	B-cell genes
ATF7IP	2413.59	-0.353983	0.0673852	-5.25312	1.49543e-07	2.27943e-06	iMac genes
CLPB	822.581	0.517223	0.0985278	5.24952	1.52497e-07	2.32211e-06	stable genes
SLC1A5	1280.25	0.44427	0.0846547	5.24802	1.5374e-07	2.33866e-06	B-cell genes
METRNL	229.148	-0.905946	0.17267	-5.2467	1.54851e-07	2.35317e-06	iMac genes
TLR4	1484.21	0.383351	0.0730864	5.24517	1.5614e-07	2.37036e-06	iMac genes
KIRREL	687.491	0.571148	0.108917	5.24388	1.57237e-07	2.3846e-06	stable genes
DLGAP5	738.759	-0.59084	0.112721	-5.24161	1.5918e-07	2.41163e-06	B-cell genes
SOD2	892.078	0.509639	0.097261	5.23992	1.6065e-07	2.43145e-06	iMac genes
NIPSNAP1	739.412	-0.672352	0.128383	-5.23708	1.6314e-07	2.46665e-06	B-cell genes
NUP93	1013.83	-0.467544	0.0894421	-5.22733	1.71975e-07	2.59553e-06	stable genes
CYTIP	1897.08	-0.391715	0.0749365	-5.22729	1.72009e-07	2.59553e-06	iMac genes
GYS1	1195.5	-0.451489	0.0863748	-5.22709	1.72194e-07	2.59571e-06	iMac genes
BCL6	2106.93	-0.351176	0.067207	-5.22529	1.73883e-07	2.61853e-06	stable genes
PSMG1	302.277	0.858313	0.164331	5.22309	1.75967e-07	2.64726e-06	B-cell genes
PPID	381.753	0.723974	0.13884	5.21445	1.84362e-07	2.77079e-06	stable genes
ACAT2	284.782	-0.956093	0.183613	-5.2071	1.91817e-07	2.87995e-06	B-cell genes
PDE4A	230.207	-0.994169	0.190952	-5.20639	1.92552e-07	2.88809e-06	B-cell genes
CLSTN2	17.2429	-8.08536	1.55336	-5.20506	1.93933e-07	2.9059e-06	iMac genes
SNRNP200	4560.72	-0.262793	0.0504924	-5.2046	1.94412e-07	2.91017e-06	B-cell genes
PER2	476.076	0.643861	0.123847	5.19886	2.00517e-07	2.99857e-06	stable genes
SLC9A1	854.829	0.518027	0.0996626	5.19781	2.01648e-07	3.01248e-06	iMac genes
HK2	1837.6	-0.441857	0.0850177	-5.19724	2.02269e-07	3.01875e-06	stable genes
MICAL2	197.798	1.00514	0.193442	5.19607	2.03547e-07	3.03481e-06	iMac genes
EFR3A	2835.63	0.289854	0.0557971	5.19478	2.04958e-07	3.05282e-06	iMac genes
TDRD9	1736.42	-0.406921	0.078359	-5.19303	2.069e-07	3.07869e-06	iMac genes
SLC39A13	456.481	0.680453	0.131061	5.19188	2.08181e-07	3.09468e-06	iMac genes
PTTG1	439.466	-0.753586	0.145335	-5.18518	2.15806e-07	3.20486e-06	B-cell genes
SETD8	415.046	-0.710642	0.137157	-5.18125	2.20409e-07	3.26997e-06	stable genes
DCAF12	1327.3	0.425513	0.0821506	5.17966	2.22287e-07	3.29459e-06	B-cell genes
ZC3H14	922.587	0.508754	0.0982263	5.1794	2.22598e-07	3.29595e-06	stable genes
KMO	237.222	0.937541	0.181063	5.17799	2.2429e-07	3.31773e-06	stable genes
NUP50	2252.15	-0.329252	0.0635964	-5.17721	2.25225e-07	3.32828e-06	stable genes
BIRC5	700.487	-0.593634	0.114787	-5.17161	2.32088e-07	3.42532e-06	B-cell genes
RAPGEF1	2045.43	-0.338924	0.0655371	-5.17148	2.32248e-07	3.42532e-06	stable genes
ZDHHC18	189.148	-1.08247	0.209349	-5.17067	2.33261e-07	3.43687e-06	B-cell genes
STAM2	506.789	0.632807	0.122444	5.16814	2.36434e-07	3.48021e-06	stable genes
CBX2	493.273	-0.720584	0.139587	-5.16224	2.44007e-07	3.58817e-06	B-cell genes
AK2	2500.21	-0.312075	0.0604823	-5.15978	2.47246e-07	3.63026e-06	stable genes
CTSO	257.721	0.841589	0.163108	5.15969	2.47353e-07	3.63026e-06	iMac genes
PLD2	239.518	0.86101	0.167027	5.15492	2.53741e-07	3.72037e-06	stable genes
PPP1R21	514.765	0.634967	0.123232	5.15263	2.56854e-07	3.76235e-06	iMac genes
CASP4	117.05	1.22367	0.237527	5.15169	2.58153e-07	3.77769e-06	iMac genes
FAM134B	205.341	-0.999233	0.194277	-5.14334	2.699e-07	3.94574e-06	stable genes
PARP14	2012.01	-0.362005	0.0703973	-5.14232	2.71367e-07	3.96332e-06	stable genes
IRF2BPL	534.119	-0.582358	0.113284	-5.14069	2.73731e-07	3.99398e-06	iMac genes
CHCHD7	561.884	0.597528	0.116246	5.14022	2.74414e-07	4.00004e-06	stable genes
RECK	641.909	0.560698	0.109149	5.13697	2.79199e-07	4.06585e-06	iMac genes
VASH2	181.753	-2.67941	0.521779	-5.13514	2.81935e-07	4.09775e-06	B-cell genes
PGPEP1	742.701	0.495873	0.0965614	5.13531	2.81682e-07	4.09775e-06	iMac genes
RANBP9	1219.75	-0.425788	0.082939	-5.13375	2.84023e-07	4.1241e-06	stable genes
FOXJ2	654.898	0.59591	0.11616	5.13008	2.89613e-07	4.20121e-06	iMac genes
PITRM1	930.696	0.481873	0.0939789	5.12746	2.93675e-07	4.25602e-06	stable genes
ORC1	469.541	-0.692452	0.135164	-5.12306	3.0061e-07	4.35232e-06	B-cell genes
ZNF730	300.894	-0.933971	0.182321	-5.12269	3.01214e-07	4.35686e-06	B-cell genes
ARID5B	2900.46	-0.295292	0.057675	-5.11993	3.05652e-07	4.4168e-06	stable genes
KCNH2	40.0781	2.401	0.468969	5.11974	3.05958e-07	4.41697e-06	B-cell genes
MSR1	544.409	-0.594636	0.116204	-5.11717	3.10148e-07	4.47316e-06	iMac genes
FOXO4	313.929	0.7779	0.152082	5.11501	3.13726e-07	4.52043e-06	iMac genes
GZMA	224.562	1.39521	0.272829	5.11387	3.15621e-07	4.54337e-06	B-cell genes
TM7SF3	634.844	0.557054	0.109	5.1106	3.21139e-07	4.61837e-06	stable genes
ASNSD1	471.626	0.64895	0.127034	5.10846	3.24788e-07	4.66638e-06	stable genes
XRCC2	565.938	-0.636385	0.12462	-5.10661	3.27982e-07	4.70777e-06	B-cell genes
RP9	77.3766	-1.74232	0.341237	-5.1059	3.29229e-07	4.72116e-06	stable genes
TTC18	630.583	0.547066	0.107198	5.10334	3.33706e-07	4.78022e-06	iMac genes
CSNK2A2	511.634	-0.663041	0.129927	-5.10318	3.33985e-07	4.78022e-06	stable genes
IGLL5	424.235	-2.39388	0.469364	-5.10027	3.39178e-07	4.84992e-06	B-cell genes
SCG2	30.8194	-2.65322	0.520676	-5.09572	3.47411e-07	4.96292e-06	iMac genes
GDPD1	54.9157	1.92986	0.379208	5.08918	3.5961e-07	5.1323e-06	stable genes
EXT1	747.1	0.497457	0.097803	5.08632	3.65081e-07	5.20543e-06	iMac genes
CBX4	479.311	-0.621163	0.122152	-5.08517	3.67294e-07	5.23202e-06	stable genes
NCOA4	12580.7	0.196815	0.0387105	5.08429	3.69009e-07	5.25148e-06	iMac genes
SAE1	1314.67	-0.437471	0.0860898	-5.08157	3.74335e-07	5.32222e-06	B-cell genes
POLD1	896.487	-0.491972	0.096821	-5.08126	3.74943e-07	5.32582e-06	B-cell genes
DOCK2	4564.41	-0.250213	0.0492523	-5.08023	3.76973e-07	5.34959e-06	iMac genes
PVR	261.757	0.895665	0.176321	5.07974	3.77961e-07	5.35856e-06	stable genes
SEPP1	117.993	-1.22379	0.240933	-5.0794	3.78626e-07	5.36291e-06	iMac genes
CCNB1	634.142	-0.601745	0.118514	-5.07742	3.82604e-07	5.41416e-06	B-cell genes
NUP205	1893.19	-0.364205	0.0717385	-5.07684	3.83773e-07	5.42558e-06	B-cell genes
JPH1	88.3484	1.97968	0.390263	5.07269	3.9223e-07	5.53993e-06	B-cell genes
WDR76	555.554	-0.62779	0.123781	-5.07179	3.94092e-07	5.561e-06	B-cell genes
RBM34	528.24	0.634675	0.125227	5.06819	4.01621e-07	5.66192e-06	stable genes
VPS53	1062.42	0.427108	0.0843179	5.06545	4.07439e-07	5.73854e-06	stable genes
E2F1	609.661	-0.664612	0.131384	-5.05853	4.22501e-07	5.94511e-06	B-cell genes
EPS8	179.35	1.03449	0.204601	5.05614	4.27833e-07	6.0145e-06	iMac genes
ZWINT	730.325	-0.565888	0.111998	-5.05266	4.35708e-07	6.11947e-06	B-cell genes
ARHGAP5	1487.7	0.405032	0.080168	5.05229	4.36554e-07	6.12563e-06	stable genes
HINT1	1290.46	0.468747	0.0928901	5.04626	4.50552e-07	6.31025e-06	stable genes
UBE2J1	1901.36	0.347281	0.0688195	5.04626	4.50541e-07	6.31025e-06	stable genes
ACACA	2965.89	-0.28876	0.0572429	-5.04447	4.5477e-07	6.36339e-06	stable genes
SLC35B2	150.056	-1.19236	0.236766	-5.03602	4.75312e-07	6.64464e-06	stable genes
RNF7	384.012	0.731348	0.145308	5.03309	4.82625e-07	6.74059e-06	stable genes
MAP4	2564.57	-0.305471	0.0607465	-5.02861	4.9404e-07	6.8936e-06	stable genes
KIF18A	366.05	-0.784265	0.156027	-5.02646	4.99612e-07	6.96488e-06	stable genes
FAM168A	931.71	0.462193	0.0920244	5.0225	5.10025e-07	7.10345e-06	stable genes
H2AFY	5028.43	-0.239459	0.0476808	-5.02213	5.11021e-07	7.11072e-06	stable genes
FUS	4991.53	-0.278734	0.0555391	-5.01869	5.20259e-07	7.23257e-06	stable genes
VPS26A	928.23	0.442745	0.0882295	5.01811	5.21834e-07	7.24775e-06	iMac genes
POLM	325.475	0.75701	0.150958	5.01472	5.31102e-07	7.36966e-06	stable genes
PHTF1	391.229	0.680921	0.135798	5.0142	5.32541e-07	7.3828e-06	stable genes
NIN	11372.1	-0.204431	0.0407891	-5.01191	5.3891e-07	7.46001e-06	iMac genes
WRNIP1	610.779	0.54183	0.10811	5.01185	5.39104e-07	7.46001e-06	stable genes
SMCHD1	3649.57	-0.279106	0.0556941	-5.01142	5.40296e-07	7.46961e-06	stable genes
IRAK2	161.976	-1.01217	0.202116	-5.00785	5.50424e-07	7.60263e-06	iMac genes
CD37	186.41	0.981173	0.196067	5.00428	5.60706e-07	7.73753e-06	iMac genes
VANGL1	461.367	0.624232	0.124782	5.00259	5.6564e-07	7.79846e-06	stable genes
ADK	633.164	-0.574067	0.114787	-5.00113	5.69952e-07	7.85069e-06	stable genes
TAC4	18.6643	5.79806	1.15955	5.00028	5.72472e-07	7.87818e-06	stable genes
KIF24	286.653	-0.859494	0.172031	-4.99615	5.84871e-07	8.04144e-06	B-cell genes
SASS6	318.009	-0.862234	0.172638	-4.99446	5.90017e-07	8.10477e-06	B-cell genes
TOPBP1	2088.96	-0.354894	0.0711865	-4.98541	6.18309e-07	8.48565e-06	stable genes
GPRIN1	399.057	-0.778313	0.156164	-4.98396	6.22967e-07	8.53396e-06	B-cell genes
LRRC4	840.543	0.484054	0.0971197	4.9841	6.225e-07	8.53396e-06	iMac genes
MCM6	1348.49	-0.429016	0.0861088	-4.98225	6.28482e-07	8.60166e-06	B-cell genes
MAD2L1	464.143	-0.717023	0.143948	-4.98111	6.32206e-07	8.64475e-06	B-cell genes
BNC2	179.707	-1.80433	0.362516	-4.97724	6.44982e-07	8.81143e-06	B-cell genes
ZNF544	623.299	-0.572069	0.114941	-4.97704	6.45632e-07	8.81229e-06	stable genes
FMN1	167.205	-1.01469	0.204036	-4.97308	6.58978e-07	8.98628e-06	iMac genes
RBM3	3345.66	-0.282673	0.0568589	-4.97149	6.64418e-07	9.05224e-06	stable genes
OSM	116.14	-1.27664	0.256835	-4.97064	6.67305e-07	9.07821e-06	iMac genes
DST	2596.08	-0.324671	0.0653185	-4.97058	6.67533e-07	9.07821e-06	stable genes
PSTPIP1	705.71	-0.528065	0.106281	-4.96857	6.74484e-07	9.16444e-06	iMac genes
CNBP	3617.21	-0.264473	0.0533034	-4.96166	6.98928e-07	9.48799e-06	stable genes
GNA11	315.345	0.790007	0.159425	4.95535	7.22004e-07	9.79238e-06	B-cell genes
FYTTD1	1397.29	-0.38954	0.0786503	-4.95281	7.3148e-07	9.91194e-06	stable genes
ATG13	634.623	-0.541843	0.109416	-4.95216	7.33957e-07	9.93655e-06	stable genes
TNXB	108.264	1.28956	0.260447	4.95135	7.37016e-07	9.96897e-06	stable genes
MBOAT7	1728.25	0.345704	0.0698404	4.94991	7.42471e-07	1.00337e-05	iMac genes
CDKN1C	209.28	-0.944189	0.19076	-4.94962	7.43577e-07	1.00339e-05	iMac genes
ARID3A	547.3	-0.554362	0.112002	-4.94956	7.43821e-07	1.00339e-05	iMac genes
GFM1	838.818	-0.496078	0.100278	-4.94705	7.53477e-07	1.0155e-05	stable genes
SLC9A9	74.9523	-1.50909	0.305271	-4.94343	7.67601e-07	1.03292e-05	iMac genes
RAD21	8093.37	-0.202848	0.0410343	-4.94338	7.67778e-07	1.03292e-05	stable genes
R3HCC1	501.574	-0.611396	0.123767	-4.93988	7.81704e-07	1.05072e-05	stable genes
SLCO2B1	44.9886	-2.21511	0.448806	-4.93556	7.992e-07	1.07327e-05	iMac genes
ARPP19	1777.96	0.371752	0.0753507	4.93362	8.07191e-07	1.08304e-05	B-cell genes
CDCA7L	1025.28	-0.48148	0.0976339	-4.93149	8.16061e-07	1.09396e-05	B-cell genes
RNF168	818.949	-0.473737	0.0960721	-4.93106	8.17853e-07	1.09538e-05	stable genes
LUZP1	1918.09	-0.343022	0.0695709	-4.93053	8.20051e-07	1.09684e-05	iMac genes
SALL4	222.321	-0.885592	0.179617	-4.93045	8.20404e-07	1.09684e-05	stable genes
PFKM	845.042	-0.526357	0.106789	-4.92895	8.26739e-07	1.10433e-05	B-cell genes
HSP90AB1	16199.4	-0.185567	0.037654	-4.92822	8.29812e-07	1.10745e-05	B-cell genes
ZC3HAV1	4296.24	-0.253739	0.0514909	-4.92785	8.31404e-07	1.10859e-05	iMac genes
EVL	1081.02	-0.43928	0.0891827	-4.92562	8.40922e-07	1.11929e-05	B-cell genes
OGDH	1698.97	-0.351778	0.0714169	-4.9257	8.406e-07	1.11929e-05	iMac genes
ARNTL	768.176	-0.492201	0.0999709	-4.92344	8.50339e-07	1.12982e-05	iMac genes
TBC1D9B	1317.2	-0.411063	0.08349	-4.9235	8.50082e-07	1.12982e-05	stable genes
RNF150	82.1671	-1.5212	0.309247	-4.91905	8.6967e-07	1.15449e-05	stable genes
CYP4V2	432.642	0.624109	0.126898	4.91821	8.73397e-07	1.15841e-05	iMac genes
INO80D	1188.7	-0.405718	0.0825275	-4.91616	8.8258e-07	1.16955e-05	stable genes
NUF2	410.885	-0.804831	0.163862	-4.91165	9.03131e-07	1.19468e-05	stable genes
LRPPRC	4441.88	-0.258338	0.0525953	-4.91181	9.02379e-07	1.19468e-05	stable genes
TSC1	976.37	-0.440046	0.0896438	-4.90882	9.16243e-07	1.21096e-05	stable genes
VARS2	403.922	0.675577	0.137703	4.90605	9.29304e-07	1.22714e-05	B-cell genes
MCM3	1557.14	-0.391522	0.0798593	-4.90265	9.45514e-07	1.24745e-05	B-cell genes
LRP8	1267.29	-0.435764	0.0888917	-4.90219	9.47757e-07	1.24931e-05	stable genes
GOT2	872.594	-0.497554	0.101558	-4.8992	9.62254e-07	1.2673e-05	B-cell genes
CHEK1	630.615	-0.592028	0.12085	-4.89885	9.64004e-07	1.2685e-05	B-cell genes
PTPRM	17.7968	-3.97567	0.812444	-4.89347	9.90755e-07	1.30256e-05	iMac genes
KALRN	181.97	-1.47534	0.301583	-4.89198	9.98253e-07	1.31127e-05	B-cell genes
SLC26A2	576.253	0.586143	0.119843	4.89093	1.00362e-06	1.31716e-05	stable genes
TSC22D3	238.631	-0.842919	0.17239	-4.88962	1.01031e-06	1.32479e-05	iMac genes
SLC20A2	639.947	0.525896	0.107694	4.88322	1.04367e-06	1.36734e-05	stable genes
FDXACB1	143.872	1.10755	0.226927	4.88062	1.05751e-06	1.38426e-05	B-cell genes
CCDC18	683.359	-0.514815	0.10552	-4.87884	1.06713e-06	1.39563e-05	iMac genes
MN1	104.101	-1.30966	0.268653	-4.87492	1.08851e-06	1.42174e-05	iMac genes
NFAM1	363.901	0.65986	0.13536	4.87484	1.08899e-06	1.42174e-05	iMac genes
GCNT1	87.1193	-1.41029	0.289457	-4.87217	1.10378e-06	1.43981e-05	iMac genes
ZNF37BP	1261.39	-0.39331	0.0807746	-4.86923	1.12036e-06	1.46016e-05	stable genes
OAF	318.484	-0.755663	0.155227	-4.86812	1.12662e-06	1.46705e-05	stable genes
ZNF184	396.328	-0.687596	0.141255	-4.86777	1.12867e-06	1.46845e-05	stable genes
POLR3B	335.508	-0.763887	0.156964	-4.86664	1.13514e-06	1.47431e-05	stable genes
PITPNA	1384.62	0.377369	0.0775417	4.86666	1.13498e-06	1.47431e-05	stable genes
NUP155	1061.16	-0.445488	0.0916219	-4.86225	1.1606e-06	1.50478e-05	B-cell genes
CSGALNACT1	140.172	-1.05716	0.217419	-4.86231	1.16027e-06	1.50478e-05	iMac genes
NOTCH1	1506.99	-0.360433	0.0741524	-4.86071	1.16967e-06	1.51522e-05	iMac genes
ATP13A3	2144.54	-0.338691	0.0697171	-4.85808	1.18531e-06	1.53416e-05	stable genes
RFXAP	336.741	-0.717426	0.147782	-4.85461	1.20623e-06	1.55989e-05	iMac genes
BRCA1	978.291	-0.480108	0.0989016	-4.8544	1.20749e-06	1.56018e-05	B-cell genes
THRAP3	4315.49	-0.257765	0.0531333	-4.8513	1.22655e-06	1.58344e-05	stable genes
SNX25	1353.45	0.37289	0.0769146	4.8481	1.2465e-06	1.60781e-05	iMac genes
PPP1R16B	206.873	-0.95207	0.196596	-4.84277	1.28038e-06	1.6501e-05	stable genes
CFL1	7073.62	-0.223757	0.0462121	-4.84196	1.28565e-06	1.65546e-05	stable genes
DENND2A	22.9785	3.95375	0.816639	4.84149	1.28866e-06	1.65792e-05	B-cell genes
RRM2B	918.216	-0.443482	0.0916225	-4.84032	1.29632e-06	1.66634e-05	iMac genes
ARL6IP1	2470.07	-0.307163	0.0634695	-4.83954	1.30143e-06	1.67148e-05	stable genes
LOC646719	655.909	0.504503	0.104408	4.83206	1.35127e-06	1.73402e-05	stable genes
ZFHX2	139.067	1.19377	0.247134	4.83046	1.36217e-06	1.7465e-05	B-cell genes
VPREB1	594.861	-0.881874	0.182829	-4.8235	1.41061e-06	1.80707e-05	B-cell genes
MASTL	610.843	-0.557342	0.115585	-4.82191	1.42189e-06	1.81997e-05	stable genes
TAMM41	89.3601	-1.52704	0.316702	-4.82169	1.42348e-06	1.82045e-05	stable genes
MAP4K5	532.362	-0.57166	0.118668	-4.81729	1.4552e-06	1.85786e-05	stable genes
TOB1	937.443	-0.446163	0.0926158	-4.81735	1.45474e-06	1.85786e-05	iMac genes
NEO1	503.702	0.584458	0.121361	4.81588	1.46554e-06	1.86947e-05	B-cell genes
ABHD14B	467.303	-0.590157	0.122596	-4.81385	1.48052e-06	1.88697e-05	iMac genes
TRIM22	1501.09	-0.396958	0.0824664	-4.81357	1.48259e-06	1.88801e-05	iMac genes
BIN1	743.671	-0.53579	0.111444	-4.8077	1.52676e-06	1.94261e-05	B-cell genes
SET	6639.18	-0.244538	0.0508824	-4.80594	1.54026e-06	1.95813e-05	B-cell genes
DUSP6	4849.68	0.226135	0.0470789	4.80332	1.56053e-06	1.98222e-05	iMac genes
XRCC6	3592.82	-0.271101	0.056457	-4.8019	1.57169e-06	1.9947e-05	B-cell genes
USF2	1065.13	0.470493	0.0980264	4.79965	1.5894e-06	2.01547e-05	stable genes
IFIT5	211.357	0.916148	0.19099	4.79683	1.612e-06	2.04068e-05	B-cell genes
CLEC4D	481.955	-0.57882	0.120665	-4.79691	1.61133e-06	2.04068e-05	iMac genes
COQ2	573.39	0.540822	0.112803	4.7944	1.63159e-06	2.06375e-05	iMac genes
SDHA	1459.23	-0.38238	0.0797956	-4.792	1.6513e-06	2.08692e-05	B-cell genes
DHFR	668.145	-0.554971	0.116004	-4.78407	1.7178e-06	2.16913e-05	B-cell genes
RB1CC1	2705.9	-0.321465	0.0672204	-4.78225	1.73344e-06	2.18705e-05	iMac genes
CTNNBL1	606.516	-0.543903	0.113802	-4.7794	1.75822e-06	2.21644e-05	stable genes
NOTCH2	3791.68	-0.269231	0.0563372	-4.77893	1.76232e-06	2.21975e-05	iMac genes
RAD51D	184.825	0.940135	0.196768	4.77789	1.77144e-06	2.22937e-05	B-cell genes
ERMN	175.634	-0.960935	0.201296	-4.77373	1.80842e-06	2.27401e-05	iMac genes
RICTOR	1974.04	-0.308361	0.0646055	-4.77298	1.81523e-06	2.28066e-05	iMac genes
IQSEC1	1219.93	-0.422492	0.0885807	-4.76957	1.84617e-06	2.31759e-05	stable genes
METTL7A	675.067	0.500355	0.104936	4.76818	1.85895e-06	2.33169e-05	stable genes
NAMPT	1687.99	-0.335671	0.070461	-4.76393	1.89858e-06	2.37941e-05	iMac genes
RINL	94.0798	1.34123	0.281657	4.76195	1.91733e-06	2.40091e-05	stable genes
PDCD1	56.3388	-4.30274	0.903778	-4.76084	1.92788e-06	2.41209e-05	B-cell genes
PCDHGA12	48.7024	-2.1765	0.457185	-4.76065	1.92967e-06	2.41233e-05	stable genes
LIN9	229.524	-0.895154	0.188105	-4.7588	1.94747e-06	2.43255e-05	stable genes
CLEC5A	860.356	-0.456448	0.0959849	-4.75541	1.98041e-06	2.47165e-05	iMac genes
PRKD3	404.324	0.677897	0.142578	4.75456	1.98879e-06	2.48004e-05	stable genes
PRRC2B	7102.01	0.199934	0.0420752	4.75183	2.01583e-06	2.51167e-05	stable genes
SYCE3	24.6315	7.21508	1.51922	4.7492	2.04225e-06	2.54248e-05	stable genes
CLEC17A	79.7793	1.4045	0.296073	4.74377	2.09781e-06	2.60948e-05	iMac genes
CENPO	515.47	-0.596349	0.125733	-4.74299	2.10589e-06	2.61737e-05	B-cell genes
MGAT5B	283.855	-0.84247	0.177644	-4.74246	2.11144e-06	2.62209e-05	B-cell genes
C14orf132	390.624	-0.747026	0.157568	-4.74098	2.12683e-06	2.63902e-05	B-cell genes
CARM1	1148.61	0.436952	0.0922471	4.73675	2.17168e-06	2.69245e-05	B-cell genes
MTMR10	759.653	0.518312	0.109618	4.72834	2.26368e-06	2.8042e-05	stable genes
SEC24D	618.502	0.503785	0.106593	4.72627	2.28684e-06	2.83056e-05	iMac genes
TBXAS1	291.384	0.709687	0.150223	4.72424	2.30981e-06	2.85663e-05	iMac genes
PARPBP	313.618	-0.77261	0.163908	-4.71369	2.43271e-06	3.00615e-05	stable genes
PCM1	8034.09	0.215532	0.0457591	4.71014	2.4755e-06	3.05651e-05	stable genes
CC2D1B	490.43	0.563279	0.11975	4.70379	2.5538e-06	3.15059e-05	stable genes
LOC102724782	60.5605	1.78384	0.379276	4.70328	2.56018e-06	3.15328e-05	stable genes
DCUN1D3	225.045	0.808736	0.171948	4.70337	2.55901e-06	3.15328e-05	iMac genes
CERK	1477.07	-0.412007	0.0876158	-4.70243	2.57081e-06	3.16378e-05	B-cell genes
ACO2	1503.85	-0.359865	0.0765994	-4.69801	2.62705e-06	3.23034e-05	stable genes
NR3C1	2199.55	-0.307238	0.0654197	-4.69642	2.64766e-06	3.25302e-05	iMac genes
TTC26	133.239	-1.13497	0.241756	-4.69471	2.66986e-06	3.27761e-05	stable genes
RAB3D	2523.72	-0.288964	0.0615614	-4.69392	2.68022e-06	3.28765e-05	iMac genes
LDLRAD4	695.741	0.626232	0.13343	4.69333	2.688e-06	3.2945e-05	B-cell genes
VIM	9060.34	-0.234339	0.0499338	-4.693	2.69221e-06	3.29697e-05	iMac genes
PNPLA2	982.566	-0.421172	0.089754	-4.69251	2.6987e-06	3.30223e-05	iMac genes
IMMP2L	97.9263	-1.40186	0.298809	-4.69149	2.71217e-06	3.31601e-05	stable genes
LARGE	309.495	-0.712703	0.151966	-4.68989	2.73351e-06	3.33937e-05	stable genes
TMEM104	948.561	-0.453749	0.0967896	-4.688	2.75892e-06	3.36747e-05	iMac genes
HBP1	771.871	-0.463036	0.0987738	-4.68784	2.76099e-06	3.36747e-05	iMac genes
SLC20A1	1373.71	0.35296	0.0753081	4.68687	2.77411e-06	3.37865e-05	stable genes
LMNB1	3198.08	-0.270248	0.0576611	-4.68683	2.77466e-06	3.37865e-05	B-cell genes
SLC43A2	1167.16	-0.419012	0.0894148	-4.68616	2.78374e-06	3.38695e-05	iMac genes
RSAD1	277.705	-0.82919	0.176951	-4.68599	2.78606e-06	3.38704e-05	B-cell genes
C18orf54	261.834	-0.854789	0.182496	-4.68389	2.81486e-06	3.41929e-05	stable genes
EYA3	736.613	0.526971	0.112524	4.68317	2.82466e-06	3.42841e-05	stable genes
PLEKHO1	851.47	-0.472934	0.101027	-4.68128	2.85095e-06	3.45753e-05	stable genes
KLHL36	593.619	0.541741	0.1158	4.67824	2.89354e-06	3.50634e-05	iMac genes
DOCK10	2675.1	0.299028	0.0639297	4.67745	2.90459e-06	3.51689e-05	B-cell genes
SLC39A10	989.718	0.42488	0.0910951	4.66414	3.09914e-06	3.74943e-05	stable genes
MYH10	1349	-0.693115	0.148635	-4.6632	3.1133e-06	3.76353e-05	B-cell genes
TENM3	1768.74	-0.324811	0.0696625	-4.66264	3.12185e-06	3.77083e-05	stable genes
TNS1	320.145	-0.943799	0.202436	-4.66221	3.1283e-06	3.77559e-05	B-cell genes
FERMT1	300.026	-0.880874	0.189119	-4.65778	3.19634e-06	3.85461e-05	B-cell genes
SMAD3	2983.25	-0.281966	0.0605604	-4.65595	3.22495e-06	3.88598e-05	iMac genes
NEGR1	57.2096	1.81552	0.390598	4.64806	3.35064e-06	4.0342e-05	B-cell genes
TRIM8	1212.4	-0.388903	0.083677	-4.64767	3.35711e-06	4.03876e-05	stable genes
TMX3	1109.9	0.38067	0.0819645	4.64432	3.41196e-06	4.10145e-05	stable genes
MMP9	1255.53	0.432891	0.093293	4.64013	3.48196e-06	4.18225e-05	iMac genes
ZNF598	930.566	-0.429178	0.0925096	-4.63928	3.49618e-06	4.19521e-05	stable genes
SESTD1	925.111	-0.433973	0.0935456	-4.63916	3.49833e-06	4.19521e-05	stable genes
RHOA	4322	-0.236455	0.0509889	-4.63739	3.52843e-06	4.22792e-05	stable genes
SFXN2	274.719	-0.873995	0.188525	-4.63596	3.55279e-06	4.25371e-05	B-cell genes
CNTNAP2	43.2197	-3.49251	0.753636	-4.63421	3.58299e-06	4.28646e-05	B-cell genes
EXOC4	972.675	-0.407368	0.0879461	-4.63201	3.62125e-06	4.32877e-05	stable genes
PIK3CB	435.417	-0.597948	0.129177	-4.62891	3.67604e-06	4.39077e-05	stable genes
SBK1	456.638	-0.714685	0.154412	-4.62844	3.6843e-06	4.39714e-05	B-cell genes
LOC101929014	20.0029	3.08819	0.667639	4.62554	3.73625e-06	4.4556e-05	stable genes
CYSLTR2	17.0414	3.51609	0.760221	4.62508	3.74447e-06	4.46187e-05	stable genes
STK38	2391.2	-0.29188	0.0631559	-4.62158	3.8082e-06	4.5342e-05	iMac genes
DUSP10	237.988	0.78188	0.169232	4.62016	3.83451e-06	4.56191e-05	iMac genes
HPCAL1	268.163	-0.7569	0.163877	-4.61871	3.86128e-06	4.59012e-05	iMac genes
GMIP	1465.28	0.342967	0.0743097	4.61537	3.92397e-06	4.66095e-05	iMac genes
BBX	1125.49	-0.399818	0.0866571	-4.6138	3.95375e-06	4.69261e-05	stable genes
B4GALNT3	53.1782	1.93806	0.420183	4.61242	3.9801e-06	4.72017e-05	B-cell genes
TMC8	1299.39	0.350164	0.0759544	4.61019	4.02309e-06	4.76738e-05	iMac genes
ADAMTS6	108.455	1.32442	0.287317	4.60964	4.03375e-06	4.77624e-05	B-cell genes
TNFSF15	195.386	0.881221	0.191458	4.60268	4.17087e-06	4.93471e-05	iMac genes
EXOG	197.48	-0.941386	0.204648	-4.60002	4.22447e-06	4.99418e-05	stable genes
CD84	246.689	0.82028	0.178336	4.59963	4.23234e-06	4.99563e-05	stable genes
ATF4	2762.68	0.289958	0.0630374	4.59978	4.22942e-06	4.99563e-05	B-cell genes
NTSR1	75.3611	-1.43442	0.31217	-4.59501	4.32731e-06	5.10371e-05	iMac genes
KIF15	944.474	-0.447051	0.0973144	-4.59388	4.3507e-06	5.12727e-05	B-cell genes
RELT	705.401	-0.470601	0.102476	-4.59229	4.38416e-06	5.16264e-05	iMac genes
NDRG1	1838.87	-0.311346	0.0678138	-4.59119	4.40716e-06	5.18567e-05	iMac genes
DNAJB12	827.741	0.43692	0.0951962	4.58968	4.43923e-06	5.21932e-05	iMac genes
CD59	416.892	0.623091	0.135768	4.58939	4.44539e-06	5.22246e-05	B-cell genes
DLG3	782.701	-0.45097	0.0983853	-4.58371	4.56798e-06	5.36229e-05	stable genes
ILF2	2766.47	-0.31936	0.0697117	-4.58115	4.62421e-06	5.42405e-05	B-cell genes
PAN3	2521.33	-0.281699	0.0615627	-4.5758	4.74392e-06	5.56013e-05	stable genes
DEPDC1	417.186	-0.643659	0.140692	-4.57496	4.76309e-06	5.578e-05	B-cell genes
CEP350	3467.65	-0.259707	0.0567689	-4.57481	4.7666e-06	5.578e-05	iMac genes
LOC102723926	42.9704	1.90163	0.415805	4.57337	4.7993e-06	5.6119e-05	stable genes
PGBD5	123.62	-1.12463	0.245975	-4.57213	4.82799e-06	5.64105e-05	iMac genes
ZCCHC4	169.764	-0.989726	0.216505	-4.57138	4.84528e-06	5.65685e-05	stable genes
EPHB2	151.364	0.972147	0.212733	4.5698	4.88189e-06	5.69516e-05	iMac genes
ARNT2	139.765	1.04433	0.22862	4.56797	4.92477e-06	5.74072e-05	stable genes
DNA2	502.679	-0.637518	0.139581	-4.56738	4.93852e-06	5.74782e-05	B-cell genes
KIAA1551	1899.36	0.31391	0.0687274	4.56747	4.93657e-06	5.74782e-05	iMac genes
PHAX	390.298	0.635509	0.139154	4.56694	4.94905e-06	5.75562e-05	B-cell genes
PPIF	877.705	-0.444964	0.0974495	-4.5661	4.96888e-06	5.77421e-05	B-cell genes
DAZAP1	2131.95	-0.325708	0.0713902	-4.56236	5.05825e-06	5.87351e-05	stable genes
RAI14	398.969	-0.675071	0.148001	-4.56125	5.08498e-06	5.9e-05	stable genes
MED29	527.205	0.535304	0.117387	4.56015	5.11171e-06	5.92643e-05	stable genes
RUNX2	76.6443	-1.36488	0.299447	-4.55799	5.16458e-06	5.9831e-05	iMac genes
TRMT6	294.961	0.729146	0.160043	4.55593	5.21537e-06	6.03624e-05	B-cell genes
ATP9A	312.452	-0.730301	0.160301	-4.55581	5.21849e-06	6.03624e-05	stable genes
CRTAC1	22.0143	2.76222	0.606434	4.55485	5.24239e-06	6.05922e-05	stable genes
TRAK2	485.847	0.557096	0.122425	4.55051	5.35173e-06	6.18083e-05	stable genes
IK	1131.06	0.37909	0.0833896	4.54601	5.46728e-06	6.30943e-05	stable genes
C5orf22	300.275	0.695298	0.153001	4.54442	5.50875e-06	6.35241e-05	stable genes
PNP	950.431	0.430426	0.0947667	4.54195	5.57362e-06	6.42228e-05	B-cell genes
PMPCB	695.716	-0.487258	0.107344	-4.53922	5.64627e-06	6.501e-05	stable genes
CSPG4	68.0432	-1.62226	0.357444	-4.5385	5.66548e-06	6.51812e-05	stable genes
CD248	1355.3	-0.355608	0.0783961	-4.53604	5.73203e-06	6.58964e-05	iMac genes
LOC101927841	193.775	-0.933811	0.205894	-4.5354	5.74947e-06	6.60464e-05	B-cell genes
AHCTF1	2410.44	0.308895	0.0681134	4.53502	5.75985e-06	6.6115e-05	stable genes
DMD	1056.73	-0.72273	0.159378	-4.53469	5.76874e-06	6.61664e-05	B-cell genes
FLOT2	954.33	-0.416703	0.0920166	-4.52856	5.93873e-06	6.80642e-05	iMac genes
BCL7A	931.182	-0.481579	0.106386	-4.52672	5.9905e-06	6.85529e-05	B-cell genes
LRIG1	640.805	-0.606689	0.134021	-4.52681	5.988e-06	6.85529e-05	B-cell genes
EMP2	307.583	-0.721	0.159303	-4.52597	6.0119e-06	6.87453e-05	iMac genes
CDKN1B	762.671	-0.486834	0.107629	-4.52328	6.08886e-06	6.95724e-05	stable genes
HCN3	30.5056	2.45161	0.542283	4.5209	6.1578e-06	7.03066e-05	stable genes
WWC1	82.277	-1.65482	0.366491	-4.51531	6.32255e-06	7.21328e-05	B-cell genes
PAICS	3225.47	-0.285369	0.0632143	-4.51431	6.35226e-06	7.23636e-05	B-cell genes
KIAA1456	149.406	1.11991	0.24808	4.51431	6.35242e-06	7.23636e-05	B-cell genes
ATP1A4	49.4114	1.68693	0.373796	4.51298	6.39242e-06	7.2764e-05	iMac genes
UHRF2	1443.61	-0.347955	0.0771205	-4.51183	6.42702e-06	7.31025e-05	stable genes
PDS5A	4421.2	0.232946	0.0516336	4.51152	6.43652e-06	7.31552e-05	stable genes
SEZ6L	43.5239	1.80886	0.401303	4.50746	6.56089e-06	7.45122e-05	iMac genes
GNAS	10083.6	0.215596	0.0478331	4.50726	6.56698e-06	7.45251e-05	stable genes
ODF2L	316.151	0.660487	0.146544	4.5071	6.57197e-06	7.45254e-05	iMac genes
ATXN10	1513.32	0.337049	0.0748121	4.50527	6.62885e-06	7.51137e-05	stable genes
MTSS1L	711.28	0.514669	0.114307	4.5025	6.71593e-06	7.6043e-05	B-cell genes
CHMP7	739.294	0.449955	0.0999395	4.50228	6.72297e-06	7.60653e-05	stable genes
IL3RA	533.497	0.519159	0.115325	4.50172	6.74062e-06	7.62076e-05	iMac genes
RNASE6	219.68	0.80333	0.178457	4.50153	6.74668e-06	7.62187e-05	iMac genes
PIK3R5	755.043	-0.454267	0.101025	-4.4966	6.90475e-06	7.79458e-05	iMac genes
FCGRT	694.113	0.460602	0.102471	4.49493	6.95936e-06	7.85032e-05	iMac genes
FAS	562.103	0.498995	0.111066	4.49276	7.03045e-06	7.92457e-05	iMac genes
HIVEP3	543.541	-0.550926	0.12279	-4.48672	7.23288e-06	8.14662e-05	iMac genes
TNFRSF8	140.01	-1.46869	0.327407	-4.48582	7.26339e-06	8.17485e-05	B-cell genes
MCL1	3366.99	0.238699	0.05322	4.48513	7.28678e-06	8.19504e-05	stable genes
IPO9	2121.94	-0.302553	0.0674787	-4.48369	7.33642e-06	8.24469e-05	stable genes
AXIN1	768.818	0.431747	0.09631	4.48289	7.36382e-06	8.26929e-05	stable genes
SH3GLB1	2412.95	0.271543	0.0606013	4.48082	7.43585e-06	8.34393e-05	iMac genes
CD83	110.938	-1.26432	0.282243	-4.47956	7.47973e-06	8.3869e-05	stable genes
TOX	285.169	1.41247	0.315357	4.47894	7.50145e-06	8.40499e-05	B-cell genes
ACOT11	156.94	0.933546	0.20852	4.47702	7.56929e-06	8.47467e-05	iMac genes
GLTP	344.045	0.633473	0.141519	4.47624	7.59698e-06	8.49934e-05	stable genes
UBR5	6921.19	-0.221336	0.0494569	-4.47533	7.62937e-06	8.52921e-05	stable genes
CLASP1	2677.92	0.275401	0.0615439	4.47487	7.6458e-06	8.54122e-05	stable genes
CCDC34	98.6446	-1.48705	0.332425	-4.47333	7.70113e-06	8.59664e-05	B-cell genes
CDH23	118.221	-1.1023	0.246505	-4.4717	7.76003e-06	8.65595e-05	iMac genes
NFATC4	534.298	0.570953	0.127776	4.46838	7.8814e-06	8.78481e-05	B-cell genes
ATP2A3	1236.16	0.390188	0.0873276	4.46809	7.89216e-06	8.79027e-05	iMac genes
DES	118.773	-1.05465	0.236049	-4.46791	7.89879e-06	8.79114e-05	iMac genes
IGSF8	252.596	0.767547	0.171802	4.46764	7.90885e-06	8.79581e-05	stable genes
ARAP1	2622.4	0.259156	0.0580196	4.4667	7.9437e-06	8.82803e-05	iMac genes
TCHP	499.647	-0.535473	0.119959	-4.46379	8.05224e-06	8.94204e-05	stable genes
PRKAG1	306.167	0.667476	0.149548	4.4633	8.07082e-06	8.95604e-05	stable genes
USP2	81.6505	-1.69618	0.380166	-4.46167	8.13228e-06	9.01759e-05	B-cell genes
NRXN2	26.3081	2.7606	0.61903	4.45956	8.21282e-06	9.09486e-05	B-cell genes
ENGASE	771.468	0.431278	0.0967093	4.45953	8.21408e-06	9.09486e-05	iMac genes
LOC100506258	95.2165	1.17425	0.263422	4.45769	8.28481e-06	9.1664e-05	iMac genes
NCL	10933.9	-0.189024	0.0424061	-4.45746	8.29366e-06	9.16944e-05	B-cell genes
RASAL2	82.6292	-1.31895	0.296009	-4.45578	8.35899e-06	9.23487e-05	stable genes
CNTRL	2621.69	-0.273882	0.0614903	-4.45407	8.42559e-06	9.3016e-05	iMac genes
ZNF704	1605.39	-0.37432	0.0840644	-4.45278	8.47672e-06	9.35117e-05	B-cell genes
FAM105A	81.7821	-1.28101	0.287712	-4.4524	8.49142e-06	9.36052e-05	iMac genes
ATRNL1	282.278	-1.05198	0.236522	-4.44769	8.67967e-06	9.56101e-05	B-cell genes
MFSD2A	210.375	0.83855	0.188622	4.44566	8.76229e-06	9.64494e-05	stable genes
LINC01138	202.984	-0.816877	0.183796	-4.44448	8.81066e-06	9.69108e-05	iMac genes
CHD3	7852.35	-0.186831	0.0420496	-4.44312	8.86649e-06	9.74535e-05	stable genes
DMPK	118.276	1.08878	0.245076	4.44264	8.88618e-06	9.75271e-05	stable genes
CDC37L1	135.51	0.984943	0.221697	4.44275	8.88167e-06	9.75271e-05	stable genes
NRBP2	217.652	0.815992	0.183741	4.44099	8.95475e-06	9.82079e-05	stable genes
CCDC171	82.1006	-1.51231	0.340575	-4.44046	8.97648e-06	9.83743e-05	stable genes
TSPAN32	323.253	0.644178	0.145076	4.44029	8.98366e-06	9.83813e-05	iMac genes
GSTA4	81.0402	1.46915	0.330921	4.43957	9.01403e-06	9.86418e-05	B-cell genes
NARF	531.062	-0.539234	0.121581	-4.43518	9.19973e-06	0.000100601	stable genes
TRPV1	147.378	0.955791	0.21557	4.43378	9.25941e-06	0.00010118	stable genes
ZNF714	697.013	-0.473903	0.106901	-4.43308	9.28945e-06	0.000101434	stable genes
FAM49B	3488.45	0.245156	0.0553098	4.43241	9.31877e-06	0.00010168	stable genes
C21orf91	642.513	0.481623	0.108682	4.43149	9.35825e-06	0.000102037	stable genes
CSF1R	1934.99	-0.291961	0.0659054	-4.43001	9.42305e-06	0.000102669	iMac genes
AKT3	998.617	0.377294	0.0852172	4.42744	9.53595e-06	0.000103748	iMac genes
DENR	1311.76	0.348323	0.0786716	4.42756	9.53061e-06	0.000103748	stable genes
C21orf58	511.128	-0.549889	0.124209	-4.42714	9.5492e-06	0.000103817	stable genes
MDC1	1666.76	-0.319271	0.072159	-4.42454	9.66468e-06	0.000104997	B-cell genes
APCDD1	42.811	1.93686	0.437889	4.42318	9.72585e-06	0.000105585	stable genes
ATP2C1	1143.86	0.37121	0.0840087	4.4187	9.92944e-06	0.000107717	stable genes
CORO2A	221.857	-0.761034	0.172346	-4.41572	1.00675e-05	0.000109136	iMac genes
SLC39A6	737.636	0.458727	0.103922	4.41415	1.01409e-05	0.000109852	B-cell genes
GAS6	22.0411	-2.69887	0.611452	-4.41387	1.01537e-05	0.000109912	iMac genes
ALG5	288.722	-0.695834	0.157714	-4.412	1.02421e-05	0.000110789	stable genes
LOC642852	96.0455	1.19003	0.269747	4.41165	1.02588e-05	0.000110889	stable genes
BPGM	121.798	1.16376	0.263952	4.40899	1.03855e-05	0.000112178	B-cell genes
SLFN11	1950.29	0.306725	0.0695777	4.40837	1.04149e-05	0.000112415	stable genes
MZT2B	584.939	-0.508402	0.115393	-4.40585	1.05371e-05	0.000113653	stable genes
CYFIP2	2631	-0.29827	0.0677291	-4.40387	1.06338e-05	0.000114613	B-cell genes
INTS6	1616.26	-0.33151	0.0753533	-4.39942	1.08543e-05	0.000116905	iMac genes
PPA1	1326.73	0.379347	0.0862905	4.39616	1.10184e-05	0.000118587	B-cell genes
NETO2	428.586	0.571255	0.129949	4.396	1.10262e-05	0.000118587	stable genes
KLF2	586.806	0.488344	0.111128	4.39445	1.11055e-05	0.000119354	iMac genes
TMEM121	102.043	-1.43894	0.327621	-4.39208	1.1227e-05	0.000120574	B-cell genes
HNRNPA1	11033	-0.177046	0.0403305	-4.38987	1.13418e-05	0.000121719	B-cell genes
TTC24	279.77	-0.723262	0.164825	-4.38807	1.14362e-05	0.000122645	stable genes
LRP10	948.979	0.394953	0.0900248	4.38716	1.1484e-05	0.000123069	stable genes
GINS1	467.508	-0.653262	0.148962	-4.38541	1.15765e-05	0.000123973	B-cell genes
IDS	1162.88	0.366858	0.0837028	4.38287	1.17128e-05	0.000125343	iMac genes
HNRNPA3	6475.97	-0.22061	0.0503382	-4.38257	1.1729e-05	0.000125427	stable genes
SIAE	279.43	0.66991	0.152883	4.38184	1.1768e-05	0.000125755	iMac genes
GPR65	296.282	0.664037	0.151631	4.3793	1.19059e-05	0.000127138	iMac genes
MACROD1	228.398	-0.821947	0.187975	-4.37263	1.22758e-05	0.000130994	B-cell genes
NDUFB8	655.246	-0.47453	0.108539	-4.37197	1.23129e-05	0.000131297	stable genes
CMSS1	278.413	-0.80198	0.183495	-4.37057	1.2392e-05	0.000132047	B-cell genes
MPP6	720.241	-0.525069	0.120143	-4.37037	1.24034e-05	0.000132074	B-cell genes
VPS37D	15.3836	6.84378	1.56631	4.36937	1.24604e-05	0.000132587	B-cell genes
DDX3X	5416.95	0.200317	0.0458703	4.36703	1.2595e-05	0.000133924	stable genes
DHRS4-AS1	73.427	-1.49837	0.343125	-4.36683	1.2606e-05	0.000133947	stable genes
PHF12	1317.04	-0.355286	0.0814116	-4.36407	1.27665e-05	0.000135556	stable genes
R3HDM2	1549.62	0.317409	0.0727722	4.36167	1.29072e-05	0.000136953	stable genes
RNASE1	210.49	-0.776334	0.178244	-4.35546	1.32787e-05	0.000140721	iMac genes
TMED3	354.541	0.6124	0.140606	4.35542	1.3281e-05	0.000140721	stable genes
CHTOP	1169.02	0.366866	0.0842556	4.3542	1.33554e-05	0.000141409	stable genes
TROAP	505.511	-0.544979	0.125272	-4.35036	1.35914e-05	0.000143746	B-cell genes
HMGCS1	920.01	-0.487796	0.112129	-4.3503	1.35953e-05	0.000143746	stable genes
HMOX2	312.994	0.659287	0.151618	4.34835	1.37165e-05	0.000144926	stable genes
SFMBT1	304.887	-0.682016	0.15686	-4.34793	1.3743e-05	0.000145103	stable genes
LAMA5	334.447	-0.733394	0.168683	-4.34775	1.3754e-05	0.000145118	B-cell genes
COX6A1	479.654	-0.623554	0.143466	-4.34636	1.38418e-05	0.00014584	stable genes
NDE1	1672.09	-0.333058	0.0766269	-4.34649	1.38336e-05	0.00014584	iMac genes
HTRA3	252.946	-0.868844	0.199942	-4.34549	1.38965e-05	0.000146313	B-cell genes
SPRED1	1070.02	0.389906	0.0897839	4.34272	1.40729e-05	0.000148066	iMac genes
ATP2B1	3787.45	-0.219625	0.0506159	-4.33905	1.431e-05	0.000150455	iMac genes
LSS	525.074	-0.572155	0.131913	-4.33736	1.44203e-05	0.000151441	stable genes
RFK	240.117	0.803655	0.185289	4.33731	1.44239e-05	0.000151441	B-cell genes
EIF5A	4256.47	-0.232854	0.0536883	-4.33714	1.4435e-05	0.000151451	B-cell genes
KCNJ2	597.416	0.546325	0.125976	4.33674	1.44612e-05	0.00015162	B-cell genes
CDC7	761.064	-0.477122	0.11012	-4.33274	1.47265e-05	0.000154294	B-cell genes
ULK1	933.47	-0.409272	0.0944962	-4.33109	1.48371e-05	0.000155344	stable genes
CEP95	878.738	-0.404902	0.0935494	-4.32822	1.50322e-05	0.000157278	stable genes
C1orf228	194.825	0.802275	0.185402	4.32721	1.5101e-05	0.000157888	iMac genes
TIPARP	413.538	0.557703	0.128958	4.32469	1.52744e-05	0.000159589	iMac genes
ENTPD4	2516.19	-0.252969	0.0584973	-4.32447	1.52901e-05	0.000159643	iMac genes
TREM1	147.835	-0.937744	0.217123	-4.31895	1.56772e-05	0.00016357	iMac genes
GAPT	47.314	1.79567	0.416007	4.31644	1.58564e-05	0.000165325	stable genes
NEAT1	12715.1	-0.163138	0.0377972	-4.31614	1.58781e-05	0.000165436	iMac genes
PSMD3	1386.28	-0.343677	0.0796409	-4.31533	1.59365e-05	0.00016593	B-cell genes
RNF11	380.235	0.590194	0.136823	4.31355	1.60652e-05	0.000167153	stable genes
HCFC1	4553.81	-0.222265	0.0515448	-4.31208	1.61728e-05	0.000168157	B-cell genes
FAM162A	279.442	0.726405	0.168508	4.31081	1.62654e-05	0.000168886	B-cell genes
ZNF639	402.534	0.602343	0.139726	4.31088	1.62608e-05	0.000168886	B-cell genes
MYOF	250.065	-0.705256	0.163695	-4.30836	1.64469e-05	0.000170652	iMac genes
ME3	141.658	-1.15651	0.26863	-4.30521	1.66824e-05	0.000172977	B-cell genes
ECM1	510.03	0.496572	0.115377	4.30392	1.67806e-05	0.000173874	iMac genes
NUP210	4388.5	-0.242406	0.056342	-4.3024	1.68954e-05	0.000174944	stable genes
XYLT1	1444.18	0.342332	0.0795845	4.30149	1.69656e-05	0.000175549	stable genes
RNF219	696.497	-0.439874	0.102296	-4.30003	1.70777e-05	0.000176587	stable genes
C9orf156	184.501	0.838886	0.195336	4.29459	1.75018e-05	0.000180848	stable genes
PTGS1	277.235	0.672319	0.156562	4.29428	1.75264e-05	0.000180978	iMac genes
GPR132	503.543	-0.516366	0.120308	-4.29205	1.77032e-05	0.000182678	iMac genes
SLC2A3	1420.4	-0.335426	0.0781541	-4.29186	1.77185e-05	0.00018271	iMac genes
SCML2	326.148	-0.680812	0.158804	-4.28712	1.81001e-05	0.000186516	B-cell genes
DDB1	3284.91	-0.248109	0.0578824	-4.28644	1.81562e-05	0.000186839	stable genes
KAT2A	610.258	0.492219	0.11483	4.28649	1.81516e-05	0.000186839	stable genes
C1orf162	145.453	0.930631	0.217228	4.28411	1.83469e-05	0.000188671	iMac genes
C1QTNF6	44.1905	1.80901	0.422411	4.28259	1.84728e-05	0.000189836	stable genes
ADRB1	213.804	0.772871	0.180596	4.27955	1.87269e-05	0.000192307	iMac genes
SLC27A1	450.054	0.561659	0.131247	4.27941	1.87388e-05	0.000192307	iMac genes
NEK10	172.312	-0.848052	0.198186	-4.27907	1.87674e-05	0.000192435	iMac genes
TTK	272.074	-0.734743	0.171711	-4.27896	1.87769e-05	0.000192435	B-cell genes
PTK2	1359.79	0.352574	0.0825037	4.27344	1.92484e-05	0.000197132	B-cell genes
GPR146	47.0338	-1.88392	0.441075	-4.2712	1.94424e-05	0.000198983	stable genes
C12orf75	168.705	-0.947955	0.222099	-4.26817	1.97086e-05	0.00020157	iMac genes
PCMTD1	1191.9	-0.346924	0.0813475	-4.26471	2.0016e-05	0.000204575	iMac genes
STK38L	1276.78	0.329984	0.0773891	4.26396	2.00831e-05	0.000205121	iMac genes
C8G	14.5405	3.46633	0.813127	4.26297	2.01731e-05	0.0002059	stable genes
SSBP3	1210.04	0.409531	0.0960821	4.2623	2.0233e-05	0.000206372	stable genes
PCDHGC5	122.704	-1.01103	0.237221	-4.26198	2.02627e-05	0.000206534	iMac genes
RGMB	309.008	0.674644	0.158328	4.26106	2.03463e-05	0.000207104	B-cell genes
MZB1	469.961	-0.724891	0.170117	-4.26113	2.03393e-05	0.000207104	B-cell genes
PVRL1	389.176	-0.600913	0.141058	-4.26004	2.04387e-05	0.000207905	stable genes
RAB12	303.35	-0.657208	0.154319	-4.25876	2.05565e-05	0.000208961	stable genes
NFE2	1407.95	-0.324262	0.0761879	-4.25609	2.08036e-05	0.00021133	iMac genes
RITA1	233.015	0.789603	0.185532	4.25587	2.08233e-05	0.000211387	stable genes
STXBP1	405.464	0.557155	0.130923	4.25559	2.08502e-05	0.000211516	iMac genes
MDK	1475.77	-0.387276	0.0910348	-4.25415	2.0984e-05	0.00021273	B-cell genes
NUP153	2896.21	-0.270609	0.0636213	-4.25344	2.10514e-05	0.000213269	stable genes
CD46	1156.5	0.359016	0.0844496	4.25124	2.12592e-05	0.00021523	iMac genes
LOC101928429	155.87	0.923524	0.2173	4.25	2.13769e-05	0.000216275	iMac genes
SRSF8	506.749	0.561799	0.132219	4.24901	2.14721e-05	0.000217092	B-cell genes
TEF	100.556	1.12125	0.264088	4.24574	2.17876e-05	0.000220134	stable genes
MORC2	815.917	0.41351	0.0974475	4.24342	2.20144e-05	0.000222275	stable genes
KCNA3	126.557	-1.06257	0.25049	-4.24196	2.21578e-05	0.000223574	iMac genes
POMGNT1	330.821	0.622402	0.146737	4.2416	2.21931e-05	0.000223727	stable genes
SMC3	1622.46	-0.321345	0.0757621	-4.2415	2.22028e-05	0.000223727	B-cell genes
TERT	361.697	-1.33489	0.314855	-4.2397	2.23817e-05	0.000225378	B-cell genes
AMFR	728.031	-0.430575	0.101627	-4.23683	2.26699e-05	0.000228128	stable genes
ASAP1-IT1	260.868	0.681094	0.16085	4.23434	2.29227e-05	0.000230517	iMac genes
REEP5	456.076	0.545899	0.128988	4.23216	2.31458e-05	0.000232605	stable genes
EMR1	98.0341	1.09095	0.257836	4.23119	2.32456e-05	0.000233451	iMac genes
DHX57	236.319	-0.782572	0.184997	-4.23018	2.33502e-05	0.000234345	B-cell genes
FUT10	282.54	0.704077	0.166473	4.22938	2.34341e-05	0.00023503	stable genes
CNOT1	7168.77	0.180762	0.0427518	4.22816	2.3561e-05	0.000236144	stable genes
COG2	411.958	-0.564771	0.133657	-4.22551	2.38397e-05	0.000238778	stable genes
FOXP1	1139.79	-0.364898	0.0864131	-4.22272	2.41369e-05	0.000241594	iMac genes
SRC	500.304	0.51594	0.1222	4.22211	2.42028e-05	0.000242092	stable genes
FAM172A	448.04	0.533613	0.126404	4.22148	2.42699e-05	0.000242602	stable genes
P2RY8	1641.27	-0.291747	0.0691152	-4.22117	2.43041e-05	0.000242783	iMac genes
SNAI3	80.7728	-1.2182	0.28862	-4.22079	2.43451e-05	0.00024303	iMac genes
SGTB	373.767	-0.631225	0.149568	-4.22033	2.43944e-05	0.000243361	iMac genes
FGR	991.614	-0.375623	0.0891033	-4.21559	2.49124e-05	0.000248363	iMac genes
NCKIPSD	181.706	-0.887406	0.210578	-4.21414	2.50729e-05	0.000249797	stable genes
AMPD3	342.669	-0.588336	0.139779	-4.20904	2.56457e-05	0.000255335	iMac genes
USP45	382.08	-0.60196	0.143073	-4.20736	2.58369e-05	0.000257068	stable genes
ANKRD36B	509.484	-0.549237	0.130584	-4.20601	2.59923e-05	0.000258423	stable genes
ARRDC3	1704.97	-0.29244	0.0695313	-4.20587	2.60076e-05	0.000258423	iMac genes
DCAF6	559.202	-0.493821	0.117461	-4.20414	2.62082e-05	0.000260073	stable genes
RNF144A	454.342	-0.869595	0.206836	-4.20427	2.61923e-05	0.000260073	B-cell genes
CSE1L	2184.37	-0.290999	0.0692649	-4.20125	2.65441e-05	0.000263232	B-cell genes
PBLD	40.098	-2.03536	0.484767	-4.19862	2.68541e-05	0.00026613	stable genes
CKAP2	1717.66	-0.306744	0.0730628	-4.19836	2.68855e-05	0.000266266	stable genes
LOC284837	235.653	0.738509	0.176089	4.19394	2.7415e-05	0.00027133	iMac genes
NEK2	244.985	-0.748386	0.178456	-4.19368	2.74467e-05	0.000271465	stable genes
LCOR	1232.8	0.32882	0.0784293	4.19257	2.75813e-05	0.000272617	stable genes
TNF	102.907	1.08981	0.260243	4.18766	2.81849e-05	0.0002784	iMac genes
RAB18	1182	0.33486	0.0800699	4.18209	2.88843e-05	0.000284888	iMac genes
ATM	4001.39	0.251795	0.0602054	4.18226	2.88624e-05	0.000284888	iMac genes
TRND	639.3	-0.457202	0.109327	-4.18198	2.88987e-05	0.000284888	stable genes
TRNAI4	49.5077	1.93248	0.462169	4.18133	2.89808e-05	0.00028551	B-cell genes
ADCK2	141.633	0.951547	0.227591	4.18095	2.90289e-05	0.000285797	B-cell genes
ARSD	1188.62	0.361653	0.0866431	4.17405	2.99228e-05	0.000294404	iMac genes
ARID2	3066.16	-0.252771	0.060578	-4.17265	3.01083e-05	0.000296036	stable genes
PAQR4	287.299	-0.690044	0.165527	-4.16876	3.06257e-05	0.000300926	B-cell genes
KIF13B	2149.57	-0.27205	0.065262	-4.16859	3.06487e-05	0.000300954	iMac genes
DDB2	673.73	-0.434268	0.104206	-4.16739	3.08111e-05	0.000302154	iMac genes
NFAT5	2102.15	0.282447	0.0677735	4.16751	3.07944e-05	0.000302154	iMac genes
LRFN3	75.2374	1.34351	0.322639	4.16411	3.12567e-05	0.000306323	stable genes
ARSB	521.291	-0.498697	0.119859	-4.16068	3.17301e-05	0.00031076	iMac genes
MLEC	3315.32	0.248657	0.0597899	4.15884	3.19861e-05	0.000313064	stable genes
PPAPDC2	109.169	-1.11116	0.267291	-4.15711	3.22301e-05	0.000315247	stable genes
SPICE1	268.285	-0.717883	0.172753	-4.15554	3.24517e-05	0.000317207	stable genes
PIF1	190.728	-0.892252	0.21499	-4.1502	3.32182e-05	0.000324488	B-cell genes
TACC2	106.833	-1.17218	0.282515	-4.14908	3.33815e-05	0.000325871	stable genes
ALPK1	407.266	-0.54653	0.131849	-4.14514	3.39613e-05	0.000331316	iMac genes
EEF2	32676.2	0.164235	0.039634	4.14379	3.41613e-05	0.000333051	stable genes
OPTN	35.6034	-2.12879	0.514276	-4.13939	3.48224e-05	0.000339275	stable genes
PLEKHG2	2176.13	0.269924	0.0652428	4.13722	3.51545e-05	0.000342289	stable genes
TCF3	3598.31	-0.266703	0.0644995	-4.13497	3.55008e-05	0.000345437	B-cell genes
ODC1	3425.65	-0.302397	0.0731787	-4.13231	3.59143e-05	0.000349234	B-cell genes
LAX1	342.209	-0.575636	0.139316	-4.13188	3.59811e-05	0.000349657	iMac genes
SMAD5	1498.91	0.31471	0.0762082	4.12961	3.63379e-05	0.000352896	stable genes
PIGC	117.519	-1.08353	0.262419	-4.129	3.6435e-05	0.000353611	stable genes
RBM33	2632.61	-0.248599	0.0602287	-4.12758	3.66602e-05	0.000355566	stable genes
LAMTOR3	332.717	0.6058	0.146786	4.12711	3.6735e-05	0.000356062	stable genes
PEA15	621.629	0.438565	0.106296	4.1259	3.6929e-05	0.000357711	iMac genes
MTHFD2	1243.11	-0.402704	0.0976222	-4.12512	3.70539e-05	0.000358689	B-cell genes
CHIC2	461.037	-0.521066	0.126321	-4.12492	3.7086e-05	0.000358769	iMac genes
RFC1	1372.54	-0.333559	0.0809042	-4.12289	3.74148e-05	0.000361717	B-cell genes
PCDHGC4	143.078	-0.925311	0.224606	-4.11971	3.7935e-05	0.00036651	iMac genes
LAPTM5	7272.83	0.174296	0.0423098	4.11951	3.79674e-05	0.000366587	iMac genes
RNF175	21.3288	-4.71356	1.14437	-4.11891	3.80673e-05	0.000367316	stable genes
HLA-DMA	299.494	0.624078	0.151564	4.11758	3.82868e-05	0.000369195	iMac genes
PARP1	4952.59	-0.206096	0.0500675	-4.11637	3.84889e-05	0.000370907	B-cell genes
CDYL2	260.157	-0.693627	0.168544	-4.1154	3.86515e-05	0.000372235	iMac genes
LPP	1904.89	0.271896	0.0660795	4.11467	3.87727e-05	0.000373163	stable genes
LRMP	6371.73	-0.254561	0.0619128	-4.11161	3.92912e-05	0.000377668	B-cell genes
LINC00341	681.401	-0.472889	0.115011	-4.11167	3.92809e-05	0.000377668	B-cell genes
CDKN3	200.807	-0.827641	0.201481	-4.10779	3.99461e-05	0.000383718	stable genes
CDC25C	141.108	-0.955212	0.232603	-4.10662	4.01486e-05	0.000385416	stable genes
TM2D3	147.41	0.916432	0.223202	4.10584	4.02854e-05	0.000386482	stable genes
FANCB	209.03	-0.826491	0.20136	-4.10453	4.05133e-05	0.00038842	stable genes
RCSD1	5625.9	-0.190336	0.0463775	-4.10405	4.05987e-05	0.000388991	iMac genes
RRBP1	1289.73	0.36285	0.0884213	4.10365	4.06677e-05	0.000389404	stable genes
CASKIN2	293.186	-0.801585	0.19537	-4.1029	4.07998e-05	0.00039042	B-cell genes
DHCR7	356.226	-0.658982	0.160796	-4.09824	4.1631e-05	0.000397866	stable genes
BLM	917.403	-0.394232	0.0961954	-4.09824	4.16302e-05	0.000397866	B-cell genes
PLEKHG4B	393.726	-0.922478	0.225198	-4.0963	4.19803e-05	0.00040095	B-cell genes
C1RL-AS1	262.709	-0.653714	0.159608	-4.09574	4.2082e-05	0.000401665	iMac genes
IVNS1ABP	1957.17	0.277777	0.0678328	4.09502	4.22138e-05	0.000402411	stable genes
METAP2	1027.28	-0.373839	0.0912901	-4.09507	4.22047e-05	0.000402411	B-cell genes
PGK1	3125.73	-0.251788	0.0615088	-4.09352	4.24872e-05	0.000404761	stable genes
GDF11	988.422	0.419078	0.102399	4.09261	4.26554e-05	0.000406105	B-cell genes
DUT	862.586	-0.425396	0.10396	-4.09194	4.27787e-05	0.000407021	B-cell genes
CAB39	1540.76	0.303351	0.0741887	4.08892	4.33388e-05	0.000412089	stable genes
ZNF512	1111.97	0.349012	0.0853703	4.08821	4.34709e-05	0.000413084	stable genes
LTN1	683.001	0.426834	0.104421	4.08764	4.35781e-05	0.00041384	stable genes
NUDT5	592.87	-0.458293	0.112123	-4.08741	4.36207e-05	0.000413983	stable genes
CD40	177.467	0.805735	0.197167	4.08657	4.37801e-05	0.000415234	iMac genes
TRNE	206.251	-0.824837	0.201933	-4.08471	4.41319e-05	0.000418306	stable genes
ARHGEF6	1607.75	-0.291422	0.0713489	-4.08447	4.4178e-05	0.000418478	iMac genes
HTT	2510.98	-0.245191	0.0600484	-4.08323	4.44149e-05	0.000420457	stable genes
GTF2IRD2B	66.6766	-1.37173	0.335975	-4.08285	4.44876e-05	0.000420615	stable genes
SPTAN1	4481.42	-0.203728	0.0498984	-4.08285	4.44868e-05	0.000420615	B-cell genes
POLR1B	812.759	0.412146	0.100983	4.08134	4.47762e-05	0.000423078	B-cell genes
NR1H3	100.086	1.04411	0.255923	4.07979	4.50759e-05	0.000425642	iMac genes
ZNF711	473.925	-0.554818	0.136007	-4.07933	4.51654e-05	0.000426218	B-cell genes
PQLC3	115.782	0.983072	0.241029	4.07864	4.52995e-05	0.000427216	stable genes
CMTM4	427.529	0.512828	0.12574	4.07847	4.53334e-05	0.000427266	iMac genes
C11orf21	508.61	0.500407	0.122731	4.07727	4.55681e-05	0.000428993	iMac genes
HCAR2	132.011	-0.942255	0.231101	-4.07724	4.55737e-05	0.000428993	iMac genes
PKDCC	327.282	1.03285	0.253402	4.07595	4.58277e-05	0.000431114	B-cell genes
LOC100506548	665.167	0.441246	0.108372	4.07158	4.66956e-05	0.000439003	stable genes
VWA8	640.214	-0.492934	0.121072	-4.07141	4.67297e-05	0.000439049	B-cell genes
SENP6	2365.23	0.260035	0.0638719	4.0712	4.67724e-05	0.000439175	stable genes
USP13	1139.35	-0.343571	0.084671	-4.05772	4.95551e-05	0.000465013	stable genes
RNF213	4827.2	0.206974	0.0510153	4.0571	4.9685e-05	0.00046594	stable genes
SNX24	44.3341	-1.7257	0.4256	-4.05474	5.01896e-05	0.000470379	iMac genes
C1orf27	432.805	0.511695	0.126315	4.05094	5.10117e-05	0.000477785	stable genes
ISM1	10.6384	-6.52962	1.61335	-4.04723	5.18273e-05	0.000485122	stable genes
TEX264	357.42	0.556942	0.137636	4.0465	5.19899e-05	0.00048634	iMac genes
TPST2	250.635	0.707273	0.174887	4.04417	5.25082e-05	0.000490883	stable genes
PWWP2B	96.1196	-1.07151	0.265054	-4.04262	5.28573e-05	0.000493839	iMac genes
PHIP	2005.54	-0.266684	0.0659744	-4.04224	5.29438e-05	0.00049434	stable genes
CCNL1	2222.81	0.255335	0.0632087	4.03956	5.35519e-05	0.000499707	iMac genes
ASRGL1	251.917	0.701441	0.173743	4.03724	5.40827e-05	0.000504346	iMac genes
HLA-DRA	2412.4	0.240404	0.0595861	4.03456	5.47041e-05	0.000509824	iMac genes
EML4	1015.53	-0.36429	0.0903012	-4.03417	5.47964e-05	0.000510051	stable genes
NIFK	617.635	0.458711	0.113704	4.03425	5.47764e-05	0.000510051	B-cell genes
DDR1	288.307	0.651721	0.161562	4.03388	5.48633e-05	0.000510358	stable genes
GBE1	871.375	-0.459377	0.113965	-4.03087	5.55698e-05	0.00051661	iMac genes
TCN1	19.4767	2.66939	0.662469	4.02945	5.59063e-05	0.000519417	iMac genes
DPYD	804.653	-0.41338	0.102597	-4.02917	5.59745e-05	0.000519728	iMac genes
SLC8A1	550.119	-0.499229	0.123986	-4.0265	5.66122e-05	0.000525325	B-cell genes
CEP70	444.811	-0.538572	0.133784	-4.02567	5.68124e-05	0.000526857	stable genes
COX7B	674.606	-0.438198	0.10886	-4.02534	5.68933e-05	0.000527281	stable genes
CDC25A	503.047	-0.554614	0.13784	-4.02359	5.73167e-05	0.000530878	B-cell genes
PPP2R5C	1815.08	-0.288435	0.0716974	-4.02294	5.7475e-05	0.000532016	B-cell genes
STK36	167.994	0.825335	0.205215	4.0218	5.77556e-05	0.000534284	stable genes
LRRC59	1366.41	-0.355693	0.0884511	-4.02136	5.7864e-05	0.000534957	stable genes
DMWD	198.232	0.74878	0.186229	4.02075	5.80141e-05	0.000536014	stable genes
ABL2	992.442	0.366439	0.0911509	4.02014	5.81642e-05	0.000537071	stable genes
AGRN	211.735	-0.721969	0.179641	-4.01895	5.84575e-05	0.000539448	iMac genes
FBXL20	782.401	-0.389897	0.0970449	-4.0177	5.87693e-05	0.000541992	iMac genes
ATP8B2	897.548	-0.389018	0.0969404	-4.01295	5.99636e-05	0.000552342	B-cell genes
RNF24	3033.31	-0.227514	0.056695	-4.01295	5.99652e-05	0.000552342	iMac genes
SLC18B1	122.198	-0.999483	0.249075	-4.01279	6.00062e-05	0.000552381	stable genes
GOLIM4	823.766	-0.401181	0.10007	-4.009	6.09757e-05	0.000560962	stable genes
CCDC91	337.104	-0.617176	0.153959	-4.0087	6.10544e-05	0.000561342	stable genes
GSE1	2361.19	-0.259497	0.0647823	-4.00567	6.18408e-05	0.000568224	stable genes
CHAMP1	803.722	-0.392801	0.09814	-4.00246	6.26882e-05	0.000575594	stable genes
KPNA4	2162.71	0.253394	0.0633116	4.00234	6.27196e-05	0.000575594	stable genes
TIGD2	139.621	0.929405	0.232334	4.0003	6.32618e-05	0.000580215	stable genes
HOOK2	135.758	0.983836	0.246008	3.9992	6.35577e-05	0.000582573	stable genes
SRGAP1	241.836	-0.697072	0.174354	-3.99801	6.3876e-05	0.000585134	iMac genes
ANKRD18A	28.1954	-2.88075	0.720582	-3.9978	6.39332e-05	0.000585301	stable genes
DUSP4	897.028	0.457815	0.114566	3.99607	6.44015e-05	0.000589229	B-cell genes
EIF3E	7795.04	0.166261	0.0416393	3.99289	6.5272e-05	0.000596829	stable genes
LIN54	935.018	-0.359891	0.0902318	-3.98852	6.64872e-05	0.000607571	stable genes
PRRT2	234.506	-0.910031	0.228231	-3.98732	6.68238e-05	0.000610275	B-cell genes
CENPA	233.418	-0.740223	0.18574	-3.98527	6.74032e-05	0.000615192	B-cell genes
FNDC3A	1368.3	0.302114	0.0758383	3.98366	6.78627e-05	0.00061901	stable genes
SMAD6	329.566	-0.564337	0.141715	-3.98219	6.82818e-05	0.000622088	iMac genes
LRRC28	81.551	1.24948	0.31378	3.98205	6.83244e-05	0.000622088	stable genes
SYNJ2	174.891	-0.917607	0.23043	-3.98215	6.82958e-05	0.000622088	B-cell genes
C15orf52	477.403	0.486806	0.122303	3.98033	6.88197e-05	0.000626217	iMac genes
ARHGAP18	188.025	-0.764074	0.191971	-3.98015	6.88705e-05	0.000626301	iMac genes
CLPTM1	869.302	0.38111	0.0957875	3.9787	6.92922e-05	0.000629754	stable genes
SKA1	221.133	-0.786704	0.197751	-3.97825	6.94231e-05	0.000630562	B-cell genes
MSL2	1320.9	-0.308508	0.0775829	-3.9765	6.99381e-05	0.000634855	stable genes
MCM3AP	1932.3	0.261811	0.0658581	3.97538	7.02667e-05	0.000637453	stable genes
ANKRD11	3483.67	0.217832	0.0548133	3.97407	7.06538e-05	0.000640578	stable genes
PDE1B	152.955	0.877309	0.220898	3.97156	7.14029e-05	0.000646979	stable genes
FGFR3	101.474	-1.02743	0.258818	-3.96968	7.19703e-05	0.000651726	iMac genes
TBCK	562.718	0.449041	0.113132	3.96917	7.21219e-05	0.000652705	stable genes
TMEM173	1463.24	0.291751	0.0735276	3.96791	7.25043e-05	0.000655771	iMac genes
RBM19	925.398	-0.39302	0.0990647	-3.96731	7.26882e-05	0.000657039	stable genes
SMC6	1798.85	-0.298827	0.0753265	-3.96709	7.2756e-05	0.000657255	stable genes
CRLF3	637.655	0.454788	0.11469	3.96537	7.32824e-05	0.000661612	iMac genes
ZBTB11-AS1	60.5255	1.33996	0.337953	3.96492	7.34209e-05	0.000662465	stable genes
REEP4	567.885	-0.443481	0.111875	-3.96406	7.36853e-05	0.000664451	iMac genes
CDK5RAP3	1012.33	0.339688	0.0857071	3.96336	7.39013e-05	0.000665999	stable genes
MTOR	1792.72	-0.298049	0.0752254	-3.96208	7.43003e-05	0.00066849	B-cell genes
SLC29A2	364.817	-0.590647	0.149072	-3.96215	7.42771e-05	0.00066849	B-cell genes
TRRAP	3498.34	-0.208797	0.0526992	-3.96204	7.43113e-05	0.00066849	stable genes
LOC102723927	125.815	-1.02606	0.259156	-3.95924	7.51881e-05	0.000675973	stable genes
HEBP1	152.68	0.822113	0.207659	3.95895	7.52814e-05	0.000676002	iMac genes
CENPM	246.774	-0.843861	0.213152	-3.95896	7.52782e-05	0.000676002	B-cell genes
RPS6KL1	83.6403	-1.47254	0.371994	-3.95849	7.54246e-05	0.000676882	B-cell genes
TP63	44.8023	1.53064	0.386727	3.95794	7.55983e-05	0.000678036	iMac genes
PEBP1	1425.4	-0.31754	0.0803117	-3.95384	7.6906e-05	0.000689353	B-cell genes
IMMT	1512.35	-0.299886	0.0758918	-3.95149	7.76668e-05	0.000695757	stable genes
ERCC2	185.981	-0.792966	0.200745	-3.95011	7.81139e-05	0.000699345	stable genes
SIN3B	716.461	0.400996	0.101556	3.94854	7.86308e-05	0.000703554	stable genes
ATP6V0D1	1331.19	-0.308472	0.078181	-3.94561	7.95963e-05	0.000711768	iMac genes
PRTFDC1	33.0134	-2.54167	0.644283	-3.94495	7.98154e-05	0.000713303	B-cell genes
CORO1C	1549.9	-0.293609	0.0744748	-3.9424	8.06712e-05	0.00072027	stable genes
CMPK2	64.3883	-1.46869	0.372544	-3.94234	8.0691e-05	0.00072027	stable genes
RPL26L1	111.607	-1.05518	0.267804	-3.94014	8.14354e-05	0.000726483	stable genes
C12orf5	430.761	0.532901	0.13527	3.93952	8.1645e-05	0.00072792	stable genes
AURKA	383.888	-0.567096	0.143974	-3.93887	8.1866e-05	0.000729458	B-cell genes
ASXL1	2122.27	-0.251772	0.0639676	-3.93593	8.28745e-05	0.000738006	stable genes
PRDM4	486.437	0.483969	0.122972	3.93561	8.29866e-05	0.000738566	stable genes
DENND1C	591.564	0.440481	0.11193	3.93533	8.30812e-05	0.00073897	iMac genes
NDUFS3	372.405	-0.583625	0.148406	-3.93263	8.40212e-05	0.000746888	B-cell genes
TUB	194.398	-1.18365	0.301048	-3.93176	8.43246e-05	0.000749142	B-cell genes
GNPDA2	216.673	0.740054	0.188247	3.9313	8.4488e-05	0.00075015	stable genes
CHAC1	54.8339	1.49816	0.381145	3.9307	8.47004e-05	0.000751591	B-cell genes
MIF4GD	72.036	-1.29899	0.330502	-3.93036	8.48184e-05	0.000752194	stable genes
MAML3	1383.68	0.361841	0.0921157	3.92812	8.56133e-05	0.000758795	iMac genes
MAEA	620.691	-0.440436	0.112131	-3.92785	8.57078e-05	0.000759184	stable genes
SLC4A2	1204.91	0.358556	0.0913291	3.92598	8.63779e-05	0.000764669	stable genes
AFF1	3719.28	-0.226052	0.0575831	-3.92566	8.64918e-05	0.000765226	stable genes
WDR89	234.604	0.683297	0.174068	3.92545	8.65661e-05	0.000765432	stable genes
CBX5	6234.99	-0.208236	0.0530561	-3.92482	8.6793e-05	0.000766986	B-cell genes
IER2	792.151	-0.466232	0.118842	-3.92314	8.74037e-05	0.000771929	iMac genes
LFNG	362.824	-0.557743	0.142191	-3.92247	8.7644e-05	0.000773596	iMac genes
ZBTB7B	850.469	-0.386641	0.0986552	-3.91911	8.88757e-05	0.000784007	iMac genes
LOC728743	103.224	-1.20358	0.307314	-3.91644	8.98669e-05	0.000792285	B-cell genes
FZD5	309.662	0.574984	0.146849	3.91548	9.02246e-05	0.000794972	iMac genes
VNN2	85.2896	-1.16833	0.298425	-3.91498	9.04111e-05	0.000796148	iMac genes
HMGA1	4790.18	-0.236477	0.0604203	-3.91387	9.0829e-05	0.000799359	B-cell genes
ABCA7	324.765	0.60237	0.153951	3.91274	9.12564e-05	0.00080265	iMac genes
LOC101929698	41.1326	-1.76858	0.452026	-3.91256	9.13244e-05	0.000802778	stable genes
TRIM28	4301.85	-0.221255	0.0565603	-3.91185	9.1592e-05	0.000804659	B-cell genes
PTGER2	404.402	0.571012	0.145982	3.91153	9.17127e-05	0.000805249	B-cell genes
HMGB1	6166.85	-0.195748	0.050047	-3.91127	9.18108e-05	0.000805639	B-cell genes
GABPB2	269.343	0.626977	0.160343	3.91021	9.22151e-05	0.00080828	stable genes
C17orf67	161.437	0.834561	0.213432	3.9102	9.22195e-05	0.00080828	stable genes
PI16	29.7095	2.0438	0.523058	3.9074	9.32941e-05	0.000817221	stable genes
SLC35E1	579.385	0.449384	0.115047	3.9061	9.37993e-05	0.000821167	stable genes
TMEM136	230.859	-0.929341	0.238045	-3.90406	9.4594e-05	0.000827642	B-cell genes
HLA-A	4056.9	-0.233457	0.0598159	-3.90293	9.50363e-05	0.000831028	iMac genes
HADHA	2381.54	-0.250623	0.064243	-3.90118	9.57252e-05	0.000836565	stable genes
MERTK	591.951	-0.437374	0.112125	-3.90076	9.58904e-05	0.000837034	iMac genes
CEP78	369.21	0.57927	0.148498	3.90085	9.5854e-05	0.000837034	B-cell genes
ALDH7A1	143.869	-1.09781	0.281556	-3.89906	9.65658e-05	0.00084244	B-cell genes
RBCK1	515.748	0.471635	0.120972	3.8987	9.67106e-05	0.000843213	stable genes
PHLPP1	1158.26	-0.332299	0.085342	-3.89373	9.8716e-05	0.000860198	B-cell genes
NET1	642.582	-0.444773	0.114267	-3.89241	9.92546e-05	0.00086439	B-cell genes
EXOC6B	106.841	-1.04681	0.269111	-3.88987	0.000100299	0.000872977	stable genes
CAPN13	20.2133	-2.80341	0.721402	-3.88606	0.000101886	0.000886277	stable genes
CEACAM21	182.752	0.83155	0.214018	3.88542	0.000102155	0.000888105	B-cell genes
SEL1L3	413.18	-0.513532	0.132181	-3.88506	0.000102304	0.000888888	iMac genes
GPSM1	883.3	-0.427706	0.110096	-3.88484	0.000102399	0.000889191	B-cell genes
ACVR2A	128.048	0.896217	0.230754	3.88387	0.000102809	0.000892238	stable genes
LOC100130872	133.965	-0.922792	0.237635	-3.88324	0.000103075	0.00089403	iMac genes
TSPAN14	3336.08	-0.227009	0.0584639	-3.88289	0.000103224	0.000894808	iMac genes
RAN	2940.03	-0.244693	0.0630328	-3.88199	0.000103605	0.000897075	B-cell genes
HGF	5713.56	-0.199281	0.0513344	-3.88203	0.000103589	0.000897075	iMac genes
RAB37	1426.23	0.286507	0.0738597	3.87908	0.000104853	0.000907356	iMac genes
TPTEP1	537.762	0.469184	0.121006	3.87736	0.000105595	0.000913249	stable genes
ARID5A	457.859	-0.504932	0.130339	-3.87399	0.00010707	0.000925473	stable genes
RUVBL2	890.724	-0.390307	0.100791	-3.87245	0.000107745	0.000930776	B-cell genes
PIAS2	950.838	-0.353318	0.0912453	-3.87217	0.000107869	0.000931311	stable genes
MIR221	17.3959	3.01592	0.778901	3.87202	0.000107936	0.000931351	B-cell genes
SMURF2	665.415	-0.403197	0.104162	-3.87086	0.000108451	0.000935261	iMac genes
FUCA1	262.659	0.656066	0.169502	3.87054	0.000108595	0.000935963	iMac genes
ZHX2	1308.11	-0.36177	0.093482	-3.86994	0.000108862	0.000937721	B-cell genes
MAPK13	477.254	0.505946	0.130781	3.86865	0.00010944	0.000942163	B-cell genes
ZNF316	694.809	0.394973	0.102114	3.86797	0.000109745	0.000944248	stable genes
MAK16	1076.75	0.338676	0.0876223	3.86518	0.000111005	0.000954545	B-cell genes
KLHL42	516.085	0.477323	0.123506	3.86479	0.000111183	0.000955379	B-cell genes
HNRNPL	3823.02	-0.218287	0.0564823	-3.86469	0.00011123	0.000955379	B-cell genes
CDCA5	549.186	-0.49918	0.129215	-3.86317	0.000111926	0.000960265	B-cell genes
RSF1	1667.83	-0.298739	0.0773297	-3.86319	0.000111918	0.000960265	stable genes
MGAT5	2640.66	0.24222	0.062721	3.86186	0.000112525	0.000964302	B-cell genes
KCTD9	593.462	-0.426484	0.110434	-3.8619	0.000112507	0.000964302	stable genes
KCNQ5-IT1	282.361	-0.657132	0.170224	-3.8604	0.0001132	0.000969532	stable genes
SORBS3	1015.78	-0.355244	0.0920432	-3.85953	0.000113604	0.000972434	stable genes
CCDC150	185.597	-0.896505	0.232389	-3.85778	0.000114421	0.00097887	B-cell genes
PDXK	1180.07	-0.330986	0.0858181	-3.85683	0.000114868	0.000981636	iMac genes
COLQ	78.7076	1.16791	0.302825	3.85672	0.00011492	0.000981636	stable genes
HEMK1	413.016	0.565095	0.146524	3.85667	0.00011494	0.000981636	stable genes
THOP1	607.131	-0.46235	0.119933	-3.85506	0.000115699	0.000986994	B-cell genes
HNMT	119.974	-0.941048	0.244106	-3.85508	0.000115691	0.000986994	iMac genes
ERAP2	455.475	-0.578659	0.150197	-3.85266	0.000116842	0.000996179	B-cell genes
FCGBP	255.492	-0.618624	0.160608	-3.85177	0.000117268	0.000999238	iMac genes
ACVR1C	38.0199	1.74941	0.454401	3.84994	0.000118149	0.00100617	iMac genes
CD19	1016.35	-0.34981	0.0909273	-3.84714	0.000119503	0.00101713	B-cell genes
PIK3R3	755.539	-0.435403	0.113221	-3.84559	0.000120263	0.00102302	B-cell genes
MIDN	1747.5	-0.319129	0.0830048	-3.8447	0.000120699	0.00102614	iMac genes
ZFP30	338.537	-0.590339	0.153606	-3.84321	0.000121437	0.00103184	stable genes
CD24	2036.14	-0.381353	0.0992726	-3.84147	0.000122299	0.00103857	B-cell genes
WIPI2	982.82	-0.360396	0.0938832	-3.83877	0.000123652	0.00104947	stable genes
SPI1	2301.45	-0.242308	0.0631285	-3.83832	0.000123878	0.0010508	iMac genes
TLR7	196.759	-0.707988	0.184503	-3.83728	0.000124405	0.00105467	iMac genes
SEC31B	797.269	0.359191	0.0936211	3.83665	0.000124726	0.00105671	iMac genes
SEMA3G	61.1186	-1.27941	0.333482	-3.83653	0.000124787	0.00105671	iMac genes
CCNB2	656.791	-0.418829	0.109182	-3.83607	0.000125019	0.00105808	stable genes
ROBO4	41.0429	-1.58524	0.413299	-3.83558	0.000125267	0.00105959	iMac genes
SKA3	406.764	-0.557057	0.1453	-3.83385	0.000126152	0.00106587	B-cell genes
STAG3	39.8613	-1.60143	0.417694	-3.83399	0.000126082	0.00106587	iMac genes
ZC3H12D	211.115	0.74124	0.193388	3.83292	0.000126633	0.00106933	B-cell genes
FKBP3	618.928	-0.476495	0.124378	-3.83102	0.000127615	0.00107702	B-cell genes
TSTD3	28.9461	-2.03949	0.532781	-3.82802	0.00012918	0.00108961	stable genes
ALOX5	803.793	-0.363679	0.0950193	-3.82742	0.000129493	0.00109164	iMac genes
KIAA0319L	682.096	0.387248	0.101206	3.82633	0.000130069	0.00109588	iMac genes
SLC16A7	1053.89	-0.363106	0.0949044	-3.82602	0.000130231	0.00109663	iMac genes
NDUFC1	269.554	-0.616163	0.161197	-3.82242	0.00013215	0.00111217	iMac genes
PAN2	625.38	0.406736	0.106425	3.82183	0.000132467	0.00111421	stable genes
MTMR4	1249.21	0.320735	0.0839444	3.8208	0.000133018	0.00111821	B-cell genes
PIK3CG	1977.01	-0.253523	0.0663586	-3.8205	0.000133179	0.00111895	stable genes
LOC100507258	28.3586	2.08067	0.544637	3.8203	0.000133292	0.00111926	stable genes
ARL6IP5	638.168	0.404971	0.10602	3.81977	0.000133578	0.00112104	iMac genes
SH3RF3-AS1	36.7522	1.6459	0.430974	3.81904	0.000133975	0.00112374	iMac genes
CD180	124.353	0.956588	0.250514	3.81851	0.000134261	0.00112551	iMac genes
HACE1	327.193	0.554443	0.145213	3.81813	0.000134469	0.00112663	stable genes
FAM129A	185.984	-0.752902	0.197261	-3.81678	0.000135205	0.00113217	iMac genes
CEP85L	353.082	-0.544377	0.1427	-3.81483	0.000136275	0.00114049	iMac genes
SLPI	144.402	-0.845613	0.221728	-3.81373	0.000136884	0.00114495	iMac genes
KIAA2018	1291.32	0.296324	0.0777209	3.81267	0.000137475	0.00114925	stable genes
CRTAP	1384.32	0.291612	0.0765051	3.81167	0.000138033	0.00115327	stable genes
ZNF654	655.07	-0.39794	0.104411	-3.81129	0.000138241	0.00115437	iMac genes
SF3B3	3281.01	-0.213325	0.055974	-3.81115	0.00013832	0.00115438	B-cell genes
INTS7	677.276	-0.431821	0.113352	-3.80955	0.00013922	0.00116072	stable genes
NRBP1	909.927	0.339194	0.0890383	3.80953	0.000139234	0.00116072	stable genes
LCN6	93.0647	-3.046	0.799831	-3.80831	0.000139921	0.0011658	B-cell genes
ANKRD46	132.727	-0.92908	0.244037	-3.80712	0.000140595	0.00117077	stable genes
C20orf197	488.116	0.457141	0.120146	3.80487	0.00014188	0.00118021	iMac genes
SNX2	1732.57	-0.262453	0.0689785	-3.80486	0.000141886	0.00118021	iMac genes
HIVEP2	817.949	-0.43578	0.114589	-3.803	0.000142956	0.0011879	B-cell genes
NPDC1	511.098	0.477844	0.12565	3.80297	0.000142969	0.0011879	iMac genes
EDEM2	252.742	0.666102	0.175259	3.80068	0.000144302	0.00119831	iMac genes
PRSS30P	10.0289	4.85846	1.27948	3.79721	0.000146335	0.00121452	stable genes
RBBP4	4019.25	-0.20115	0.0529805	-3.79668	0.00014665	0.00121646	stable genes
CLEC4A	29.6705	1.9586	0.515893	3.79652	0.000146739	0.00121653	stable genes
IFT46	73.0956	-1.42692	0.375923	-3.79578	0.000147183	0.00121954	B-cell genes
CDKN2B-AS1	112.735	-0.931018	0.245406	-3.79379	0.000148365	0.00122866	iMac genes
TLE3	399.674	0.514707	0.135693	3.79318	0.000148732	0.00123102	iMac genes
FEM1B	1372.35	-0.290458	0.0766917	-3.78734	0.000152266	0.00125958	stable genes
DVL1	464.147	0.477172	0.12601	3.78678	0.000152611	0.00126173	stable genes
MAP4K2	415.512	-0.537827	0.142234	-3.7813	0.000156014	0.00128916	iMac genes
ESYT1	2070.19	-0.24313	0.0643519	-3.77813	0.000158011	0.00130494	iMac genes
ZNF259	508.066	0.458357	0.121335	3.77762	0.000158336	0.0013069	stable genes
HTR7P1	121.097	0.923126	0.244383	3.77738	0.000158485	0.00130742	iMac genes
MIR181A1HG	136.52	0.977467	0.258978	3.77433	0.000160441	0.00132283	B-cell genes
MIR210HG	45.7937	-3.30973	0.877135	-3.77334	0.000161074	0.00132731	iMac genes
DDN	131.993	-3.37105	0.894091	-3.77037	0.000163007	0.0013425	B-cell genes
C5orf56	67.9838	1.37795	0.365489	3.77017	0.000163139	0.00134286	B-cell genes
LRRCC1	278.756	-0.690905	0.183446	-3.76625	0.000165716	0.00136332	B-cell genes
PIP5K1B	42.4919	1.58212	0.420356	3.76376	0.00016738	0.00137626	stable genes
NDUFAF3	281.874	-0.627711	0.166816	-3.7629	0.000167956	0.00138023	stable genes
BEAN1	15.2176	2.74645	0.730092	3.76178	0.000168706	0.00138564	iMac genes
FDPS	781.796	-0.406743	0.108137	-3.76137	0.000168986	0.00138719	B-cell genes
UQCRC1	1359.18	-0.294432	0.0783576	-3.75755	0.000171588	0.00140777	stable genes
VPS37B	830.442	0.383752	0.102146	3.75689	0.000172037	0.00141068	B-cell genes
INCENP	1477.71	-0.285432	0.0759801	-3.75667	0.000172187	0.00141114	stable genes
SAMHD1	590.313	0.418056	0.111299	3.75614	0.000172553	0.00141337	iMac genes
ATN1	1716.05	0.268747	0.071554	3.75586	0.000172746	0.00141418	stable genes
ACOT7	396.661	-0.634541	0.168995	-3.75479	0.000173488	0.00141948	B-cell genes
CENPW	126.752	-0.969861	0.258348	-3.75408	0.000173977	0.00142271	B-cell genes
SFPQ	10572.3	-0.163545	0.0435823	-3.75257	0.000175032	0.00143056	stable genes
LDLRAP1	273.497	0.688745	0.183566	3.75203	0.00017541	0.00143287	B-cell genes
VEZT	931.494	0.365003	0.0972887	3.75175	0.000175603	0.00143313	B-cell genes
CXorf23	357.061	0.527222	0.140528	3.75171	0.000175633	0.00143313	iMac genes
RBBP7	1317.63	-0.299715	0.0799165	-3.75035	0.000176586	0.00144012	stable genes
BRWD1	2907.85	-0.229164	0.061111	-3.74997	0.000176856	0.00144154	stable genes
IRF2BP2	5651.56	0.176209	0.0470128	3.74811	0.000178173	0.0014507	iMac genes
CDH2	444.081	-0.497425	0.132711	-3.74818	0.000178122	0.0014507	stable genes
PSMD1	1716.67	-0.260802	0.069604	-3.74693	0.000179009	0.00145671	stable genes
ATP2A2	3445.69	0.197681	0.0527801	3.74538	0.000180123	0.00146419	stable genes
TRIM23	216.02	-0.671273	0.179223	-3.74547	0.000180057	0.00146419	iMac genes
TRIM24	1096.84	-0.329831	0.0881256	-3.74274	0.000182027	0.00147887	stable genes
PLOD1	509.056	0.459686	0.122852	3.74178	0.000182723	0.00148372	iMac genes
PAIP2	1699.96	-0.265963	0.0711007	-3.74064	0.00018355	0.00148963	stable genes
OBSL1	367.279	0.555846	0.148604	3.74045	0.00018369	0.00148996	B-cell genes
CDCA4	387.731	-0.574989	0.153892	-3.73633	0.000186727	0.00151323	B-cell genes
MRPS27	865.822	-0.367938	0.098477	-3.73628	0.00018676	0.00151323	B-cell genes
RBMS1	494.025	-0.450072	0.120476	-3.73577	0.00018714	0.00151549	iMac genes
NR6A1	67.1363	1.18038	0.31598	3.73561	0.000187259	0.00151563	iMac genes
LRRC37B	241.105	-0.636315	0.170388	-3.7345	0.000188085	0.00152151	iMac genes
MDGA1	58.9056	1.28097	0.34306	3.73394	0.000188507	0.0015241	stable genes
MGEA5	3445.16	-0.195983	0.0524947	-3.73339	0.000188919	0.00152588	stable genes
RHOT2	862.16	-0.364977	0.0977605	-3.73338	0.000188931	0.00152588	stable genes
RBMX	4788.73	-0.193745	0.0519035	-3.73279	0.000189367	0.00152858	B-cell genes
ANG	20.4681	2.31465	0.620174	3.73226	0.000189769	0.001531	stable genes
BBS9	73.0309	-1.28823	0.345208	-3.73174	0.000190159	0.00153332	stable genes
MADD	2272.62	-0.236233	0.0633241	-3.73055	0.000191063	0.0015382	iMac genes
HSF4	190.698	0.701264	0.187979	3.73054	0.000191071	0.0015382	iMac genes
LY6E	614.507	-0.420046	0.112592	-3.73068	0.000190961	0.0015382	stable genes
CNOT6	1525.2	-0.286554	0.0768512	-3.72869	0.000192476	0.00154868	stable genes
GATSL3	39.0415	1.61812	0.434078	3.72771	0.000193231	0.00155392	stable genes
N4BP2L2	1448.1	0.280964	0.0754007	3.72627	0.000194332	0.00156194	stable genes
MYL6	2288.94	-0.263388	0.0707072	-3.72505	0.000195274	0.00156867	stable genes
EIF4E2	834.574	0.349404	0.0938113	3.72454	0.000195669	0.001571	stable genes
KLHL21	318.02	-0.573991	0.154148	-3.72365	0.000196367	0.00157576	stable genes
POLR3H	383.967	0.522496	0.14055	3.71752	0.000201185	0.00161357	B-cell genes
TMX1	1000.27	0.324365	0.0872668	3.71693	0.000201655	0.00161647	stable genes
ATXN7L1	463.245	-0.478743	0.128816	-3.71649	0.000202007	0.00161843	iMac genes
CAPN2	1159.6	-0.295485	0.0795421	-3.71483	0.000203342	0.00162739	iMac genes
BOLA3	65.4401	-1.36224	0.3667	-3.71487	0.000203312	0.00162739	B-cell genes
SLC22A5	60.6877	1.37843	0.371161	3.71384	0.000204139	0.00163289	B-cell genes
PCNT	1634.37	-0.267661	0.0720971	-3.7125	0.00020522	0.00164067	stable genes
ELK1	467.002	0.462885	0.124849	3.70755	0.000209273	0.00167218	stable genes
SHOC2	2079.66	-0.239347	0.0645591	-3.7074	0.000209395	0.00167226	stable genes
LRBA	1152.28	-0.334065	0.0901246	-3.7067	0.000209975	0.00167601	B-cell genes
DDX21	4095.92	0.223075	0.0601895	3.7062	0.000210388	0.00167841	B-cell genes
HS2ST1	1865.78	0.243013	0.0656342	3.70253	0.000213459	0.0017011	iMac genes
PAX8-AS1	411.767	0.476997	0.128828	3.70259	0.000213414	0.0017011	iMac genes
RAC2	1454.8	0.273912	0.073984	3.70231	0.000213647	0.0017017	iMac genes
RTKN	135.398	-0.942087	0.254497	-3.70176	0.000214109	0.00170447	stable genes
HLA-DPB1	328.856	0.534022	0.144267	3.70162	0.000214226	0.0017045	stable genes
SGCE	46.1897	-3.08941	0.834763	-3.70095	0.000214796	0.00170813	B-cell genes
C2orf48	68.0979	-1.27271	0.343994	-3.69981	0.000215759	0.00171488	stable genes
HYOU1	2043.54	-0.238337	0.064478	-3.69641	0.000218671	0.0017371	stable genes
TMEM237	267.309	-0.813345	0.220164	-3.69427	0.000220518	0.00175085	B-cell genes
RBM8A	1160.5	-0.322139	0.0872394	-3.69259	0.000221982	0.00176154	B-cell genes
THEMIS2	1363.88	-0.283673	0.0768362	-3.69192	0.000222571	0.00176529	iMac genes
SLC12A5	175.531	0.718465	0.19463	3.69144	0.000222991	0.00176702	iMac genes
RYK	225.555	0.69217	0.187509	3.6914	0.000223026	0.00176702	iMac genes
RTKN2	624.034	-0.492511	0.133444	-3.69077	0.000223574	0.00177044	B-cell genes
EMR3	163.345	0.735846	0.199399	3.69032	0.000223972	0.00177265	iMac genes
PMFBP1	68.8102	-1.23562	0.335016	-3.68824	0.000225811	0.00178626	stable genes
CPD	1509.41	0.269632	0.0731139	3.68783	0.000226175	0.0017882	iMac genes
STARD3NL	311.078	0.562426	0.152532	3.68728	0.000226668	0.00179115	stable genes
SWAP70	171.69	-0.804435	0.218198	-3.68673	0.000227157	0.00179408	stable genes
RFC3	546.244	-0.472912	0.128281	-3.68653	0.000227332	0.00179451	B-cell genes
RHOBTB2	627.254	-0.390257	0.105881	-3.68583	0.000227962	0.00179854	iMac genes
CERS6	2046.81	0.242999	0.0659851	3.68264	0.000230834	0.00182024	stable genes
LOC102723569	85.7003	1.18742	0.322534	3.68153	0.000231836	0.00182718	B-cell genes
CENPH	263.788	-0.670543	0.182261	-3.67903	0.000234122	0.00184423	B-cell genes
GALNT3	541.748	-0.410114	0.111483	-3.67872	0.000234408	0.00184551	iMac genes
ALG13	917.823	0.3435	0.0934344	3.67638	0.00023657	0.00186156	stable genes
CACNB1	179.487	-0.743556	0.202264	-3.67617	0.000236762	0.0018621	stable genes
ZNF93	533.022	-0.455175	0.123893	-3.67395	0.000238834	0.00187741	stable genes
PPFIA4	130.989	0.931774	0.253691	3.67287	0.000239844	0.00188436	B-cell genes
CRKL	1282.96	-0.296611	0.0807605	-3.67272	0.000239978	0.00188443	stable genes
PRDM1	479.385	-0.474412	0.129177	-3.67257	0.000240122	0.00188457	iMac genes
HGSNAT	1175.04	0.306015	0.0833346	3.67212	0.000240544	0.0018869	iMac genes
C11orf30	621.905	-0.424364	0.115584	-3.67146	0.000241165	0.00189078	stable genes
KCNN2	9.6005	-4.15741	1.13277	-3.67012	0.000242433	0.00189973	iMac genes
RAB11A	1050.42	0.324515	0.0884402	3.66932	0.000243199	0.00190474	stable genes
KNSTRN	499.473	-0.461757	0.125925	-3.6669	0.000245505	0.0019218	stable genes
ZDHHC23	75.0982	1.18702	0.324	3.66365	0.000248648	0.00194539	stable genes
IBA57	225.041	-0.671889	0.183415	-3.66322	0.000249067	0.00194664	stable genes
MYLK	479.038	-0.901295	0.246031	-3.66333	0.000248953	0.00194664	B-cell genes
NPIPB5	222.619	0.724438	0.197873	3.66112	0.000251119	0.00196165	stable genes
RCBTB2	804.025	0.359187	0.0981395	3.65996	0.000252251	0.00196947	iMac genes
C11orf45	23.9718	-2.05959	0.562865	-3.65911	0.000253089	0.00197499	iMac genes
LSM11	74.0437	1.1902	0.325424	3.65737	0.000254813	0.00198741	B-cell genes
B3GALT6	243.143	0.640037	0.175093	3.65541	0.000256775	0.00200147	B-cell genes
AHDC1	1266.22	0.301865	0.0825829	3.6553	0.000256883	0.00200147	stable genes
MOV10	727.491	0.381925	0.10453	3.65374	0.000258444	0.00201259	B-cell genes
ARHGEF11	1667.82	0.259589	0.0710634	3.65292	0.000259279	0.00201805	iMac genes
CD164	2324.46	0.224396	0.0614991	3.64877	0.000263502	0.00204986	iMac genes
PLCL2	497.454	-0.437867	0.120073	-3.64669	0.000265642	0.00206543	iMac genes
EMC3-AS1	369.272	-0.55684	0.15273	-3.6459	0.000266457	0.0020707	stable genes
ANXA11	1352.19	0.293326	0.0804628	3.64548	0.00026689	0.00207299	stable genes
EXTL1	35.0287	1.62645	0.446257	3.64464	0.000267768	0.00207868	stable genes
TMEM117	82.4119	-1.30515	0.358114	-3.64451	0.000267899	0.00207868	B-cell genes
ATP5G2	1528.07	-0.270764	0.0743412	-3.64218	0.000270336	0.0020965	stable genes
S100A8	4864.46	-0.386932	0.106313	-3.63956	0.000273107	0.0021169	iMac genes
CD63	1209.98	0.287604	0.0790702	3.63732	0.000275488	0.00213425	iMac genes
FAM43A	578.679	-0.395685	0.108865	-3.63462	0.000278387	0.0021556	iMac genes
NEK8	111.115	0.960621	0.264339	3.63405	0.000279012	0.00215932	stable genes
ETNK1	1384.55	0.280613	0.0772229	3.63381	0.000279267	0.00216018	stable genes
ATXN1	531.072	-0.413174	0.11371	-3.63358	0.000279513	0.00216098	iMac genes
ARID1B	2837.08	-0.206568	0.0568685	-3.63238	0.000280819	0.00216995	stable genes
DTYMK	220.652	-0.757863	0.208668	-3.63191	0.00028133	0.00217278	B-cell genes
ECT2	741.41	-0.39809	0.109632	-3.63113	0.000282182	0.00217824	B-cell genes
FAM66D	43.4624	-1.74365	0.480305	-3.6303	0.000283088	0.00218411	B-cell genes
RADIL	125.134	0.985838	0.27161	3.62961	0.000283851	0.00218888	B-cell genes
ACTG1	18826.5	-0.176193	0.0485792	-3.62692	0.000286824	0.00221066	stable genes
ZNF160	712.454	-0.382095	0.10536	-3.62656	0.00028722	0.00221258	iMac genes
SORBS2	105.745	1.03463	0.285319	3.62623	0.000287592	0.00221431	stable genes
CENPJ	809.114	-0.357923	0.0987865	-3.62319	0.000290988	0.00223931	stable genes
TCP11L2	288.362	-0.612186	0.169002	-3.62235	0.000291935	0.00224545	iMac genes
RPS6KA4	314.392	-0.547699	0.15121	-3.62211	0.000292214	0.00224644	iMac genes
SRSF11	3069.38	0.214907	0.059374	3.61955	0.000295118	0.00226761	stable genes
NUMA1	5810.56	-0.175391	0.0484854	-3.61739	0.000297587	0.00228541	stable genes
AJUBA	92.9351	1.47612	0.408136	3.61674	0.000298337	0.00228999	B-cell genes
ACTL6A	603.018	-0.431468	0.119329	-3.61578	0.000299444	0.00229732	B-cell genes
RECQL4	450.718	-0.49648	0.137349	-3.61472	0.000300669	0.00230554	B-cell genes
LOC101927697	40.2923	2.21334	0.612575	3.61318	0.000302467	0.00231814	B-cell genes
KLHL15	405.723	0.483488	0.133827	3.61277	0.00030294	0.00232058	stable genes
CPNE5	32.4939	1.85104	0.512422	3.61233	0.000303458	0.00232337	stable genes
TRIM13	476.981	0.45103	0.12497	3.60911	0.000307245	0.00235116	stable genes
HIATL1	925.084	-0.327357	0.0907338	-3.60788	0.000308712	0.00236119	iMac genes
FUT8	354.889	0.524904	0.145523	3.60702	0.000309735	0.0023678	stable genes
ABI3	105.282	-0.948544	0.263058	-3.60584	0.00031115	0.00237741	iMac genes
RBM15	1035.65	-0.314691	0.0872946	-3.60493	0.00031224	0.00238452	stable genes
SNRPD1	790.524	-0.379572	0.105312	-3.60426	0.000313047	0.00238947	B-cell genes
ARHGAP23	841.089	-0.339143	0.0941555	-3.60194	0.000315851	0.00240965	stable genes
LONRF1	723.766	-0.374444	0.103995	-3.6006	0.000317489	0.00242091	stable genes
TRAM1	2098.14	0.233722	0.0649202	3.60014	0.000318047	0.00242394	stable genes
ARMC2	89.8952	0.983261	0.273373	3.59677	0.00032219	0.00245427	stable genes
USPL1	499.085	0.430729	0.119772	3.59623	0.000322863	0.00245815	stable genes
RCOR2	399.564	-0.586637	0.163138	-3.59595	0.000323209	0.00245954	B-cell genes
CD58	743.08	-0.35573	0.0989297	-3.59579	0.000323412	0.00245984	iMac genes
RAVER1	1592.69	-0.267851	0.0744934	-3.59563	0.000323609	0.00246008	stable genes
PPP1CA	1510.94	0.299372	0.0832654	3.59539	0.000323906	0.00246109	stable genes
GAS5	1229.98	0.288618	0.0802893	3.59473	0.000324732	0.00246612	stable genes
AARS	1224.95	0.311217	0.0865859	3.59432	0.000325243	0.00246876	B-cell genes
VMP1	1493.94	0.256412	0.0713529	3.59358	0.000326166	0.00247326	iMac genes
TMSB10	5505.66	-0.205333	0.0571386	-3.59359	0.000326155	0.00247326	stable genes
TRIM38	2044.27	-0.231001	0.0642943	-3.59287	0.000327052	0.00247873	stable genes
CUX1	2717.36	0.208916	0.0581551	3.5924	0.000327648	0.00248199	stable genes
ANGEL1	357.433	0.508636	0.141709	3.5893	0.00033157	0.00251044	stable genes
POLE2	120.929	-1.0204	0.284332	-3.58874	0.000332275	0.0025145	B-cell genes
APOL2	122.248	-0.931608	0.259704	-3.58719	0.000334263	0.00252827	stable genes
LYRM4	214.92	-0.693681	0.193437	-3.58608	0.00033569	0.00253779	stable genes
IDI1	786.495	-0.376038	0.105021	-3.5806	0.000342801	0.00259025	stable genes
SSBP4	1011.01	0.312724	0.0873602	3.57971	0.000343976	0.00259651	iMac genes
XIAP	957.19	0.32188	0.0899177	3.57972	0.000343964	0.00259651	stable genes
EFCAB14	1277.62	0.274356	0.0766924	3.57735	0.000347095	0.00261873	iMac genes
EIF2D	324.884	-0.549756	0.15377	-3.57518	0.000349987	0.00263923	stable genes
ASB1	341.063	0.523178	0.146346	3.57493	0.000350315	0.00264038	stable genes
TOR1AIP1	773.356	0.345118	0.0965982	3.57272	0.000353297	0.00266018	iMac genes
PAIP1	457.485	-0.474332	0.132763	-3.57276	0.000353233	0.00266018	B-cell genes
KIFAP3	142.35	-0.877844	0.245828	-3.57096	0.00035567	0.00267671	B-cell genes
TPI1	2820.85	-0.230515	0.0645578	-3.57068	0.000356053	0.00267775	stable genes
KDM7A	4056.07	-0.191778	0.0537103	-3.5706	0.000356165	0.00267775	iMac genes
OSGEP	499.184	0.434927	0.121814	3.57041	0.000356423	0.00267834	stable genes
[truncated: 28,019 more rows]

## Sheet: Supplementary Table 3
Supplementary Table 3. qPCR primer sequences. Originally published in Rapino et al., 2013; DOI: 10.1016/j.celrep.2013.03.003.
Name	Sequence
hGAPDH-mRNA-115_fw	TCTCTGCTCCTCCTGTTCGAC
hGAPDH-mRNA-237_rev	GGCGCCCAATACGACCAAAT
IGJ_fw	TGTTCATGTGAAAGCCCAAG
IGJ_rev	TCGGATGTTTCTCTCCACAA
VPREB3_fw	GGGGACCTTCCTGTCAGTTT
VPREB3_rev	ACCGTAGTCCCTGATGGTGA
CD14_fw	GATTACATAAACTGTCAGAGGC
CD14_rev	TCCATGGTCGATAAGTCTTC
FCGR1B_fw	CCTTGAGGTGTCATGCGTG
FCGR1B_rev	AAGGCTTTGCCATTTCGATAGT
