# Supplementary material for: CTCF depletion decouples enhancer-mediated gene activation from chromatin hub formation
Source: Nat Struct Mol Biol. 2025 May 13;32(7):1268–81. doi: 10.1038/s41594-025-01555-z (PMC12263429; doi:10.1038/s41594-025-01555-z)
Supplement: Supplementary file 4 — Statistical source data. [file 41594_2025_1555_MOESM4_ESM.xlsx]

## Sheet: Fig. 1b-c
Figure 1b-c. Absolute gene expression counts derived from TT-seq data.
	0h_rep1	0h_rep2	12h_rep1	12h_rep2	24h_rep1	24h_rep2	72h_rep1	72h_rep2	96h_rep1	96h_rep2
MYB	46047.5	41461.8	12209.7	13192	10843.2	11204.4	8896.15	8635.87	10976.3	11390
TRIB1	871.873	1037.24	8235.99	8883.99	7391.81	7238.2	32521.8	35917.5	47034.1	53142.2

## Sheet: Fig. 1f
Figure 1f. Interaction frequencies of promoters of iMac-specific genes.
chr	start	end	viewpoint	0h	24h	96h	annotation
chr1	12118721	12118856	TNFRSF1B	3.15935	3.85012	5.34917	CTCF
chr1	12124894	12125129	TNFRSF1B	9.59172	11.929	19.7013	CTCF
chr1	12143672	12144142	TNFRSF1B	5.14402	9.13683	17.5541	CTCF
chr1	12184249	12184619	TNFRSF1B	2.55121	7.98898	14.8619	CTCF
chr1	12196713	12197072	TNFRSF1B	3.83873	6.84875	12.7273	CTCF
chr1	12208956	12209115	TNFRSF1B	10.3265	8.6571	12.9747	CTCF
chr1	12244247	12244360	TNFRSF1B	0.275059	0.717611	3.11622	CTCF
chr1	166910507	166910730	CREG1	2.72259	2.56921	1.87921	CTCF
chr1	167066696	167066870	CREG1	2.24641	2.5152	3.14357	CTCF
chr1	167220889	167220989	CREG1	1.42639	1.77419	3.07925	CTCF
chr1	167267944	167268094	CREG1	4.18833	4.75655	5.37788	CTCF
chr1	167401349	167401583	CREG1	3.75833	4.37507	6.98948	CTCF
chr1	167442277	167442418	CREG1	3.7271	2.73418	4.23716	CTCF
chr1	167533894	167534051	CREG1	6.06192	5.04131	5.18319	CTCF
chr1	167540489	167540645	CREG1	9.02107	7.10991	6.80527	CTCF
chr1	167556217	167556345	CREG1	64.9932	45.353	55.5358	CTCF
chr1	167600155	167600310	CREG1	5.69052	5.11285	7.25659	CTCF
chr1	167600390	167600503	CREG1	0.92801	2.7898	6.35589	CTCF
chr1	167617331	167618072	CREG1	3.82724	3.90066	5.02	CTCF
chr1	167687989	167688186	CREG1	7.7076	7.46581	11.9973	CTCF
chr1	167715494	167715703	CREG1	4.51631	3.74372	4.73144	CTCF
chr1	167721119	167721218	CREG1	1.14946	0.860401	2.5171	CTCF
chr1	167797149	167797345	CREG1	1.2364	2.96248	0.683065	CTCF
chr1	167803402	167803655	CREG1	2.44408	3.14231	2.33464	CTCF
chr1	198156927	198157077	PTPRC	0.0354123	0.989207	3.27305	CTCF
chr1	198465694	198465838	PTPRC	1.58859	2.22894	6.17507	CTCF
chr1	198620957	198621839	PTPRC	4.66786	12.8715	8.76985	CTCF
chr1	198686230	198686354	PTPRC	2.01309	3.09354	7.45059	CTCF
chr2	27683611	27683836	FOSL2	3.38124	3.23672	2.75244	CTCF
chr2	27703840	27704122	FOSL2	8.49763	6.45043	8.85297	CTCF
chr2	27715551	27715743	FOSL2	3.81793	2.61291	2.02484	CTCF
chr2	27723388	27723599	FOSL2	2.99196	3.06354	3.37998	CTCF
chr2	27754200	27754497	FOSL2	4.58732	7.40198	16.7627	CTCF
chr2	27890142	27890246	FOSL2	1.62262	3.02092	3.17552	CTCF
chr2	27954927	27955403	FOSL2	3.82973	9.58083	14.4243	CTCF
chr2	28155756	28155878	FOSL2	3.68913	3.26982	2.28733	CTCF
chr2	28379126	28379369	FOSL2	2.83587	4.40587	4.64708	CTCF
chr2	28381916	28382105	FOSL2	3.65597	5.54096	2.75926	CTCF
chr2	28390605	28390750	FOSL2	33.0472	26.993	27.8112	CTCF
chr2	28419422	28419596	FOSL2	4.3923	1.31693	1.79879	CTCF
chr2	28452529	28452737	FOSL2	7.31161	5.32186	11.9675	CTCF
chr2	64049741	64050149	PELI1	3.5615	3.87526	6.24127	CTCF
chr2	64228332	64228555	PELI1	4.20081	5.37074	8.7326	CTCF
chr2	64277255	64277774	PELI1	0.603593	4.35787	9.20397	CTCF
chr2	64298274	64298417	PELI1	0.643047	0.918113	4.02546	CTCF
chr2	64312477	64312598	PELI1	0.399143	2.31721	4.2728	CTCF
chr2	64328015	64328198	PELI1	2.46274	5.67563	8.22193	CTCF
chr2	64330978	64331124	PELI1	2.99965	3.43586	3.88962	CTCF
chr2	69714805	69714909	MXD1	2.67244	1.37355	1.49638	CTCF
chr2	69724735	69724937	MXD1	7.0165	6.36983	5.9243	CTCF
chr2	69829416	69829781	MXD1	3.40127	2.89372	2.89111	CTCF
chr2	69902451	69902910	MXD1	3.30424	5.82251	6.82623	CTCF
chr2	69912128	69912248	MXD1	40.8621	29.3289	28.2538	CTCF
chr2	69985695	69986028	MXD1	0.249971	1.42705	4.02148	CTCF
chr2	70062343	70062541	MXD1	0.736865	2.52149	5.50035	CTCF
chr2	70070846	70071150	MXD1	7.65284	14.3547	18.1249	CTCF
chr2	70088159	70088333	MXD1	3.74482	6.15806	9.04938	CTCF
chr2	70123173	70123291	MXD1	2.59321	2.97067	6.26325	CTCF
chr2	70137594	70137791	MXD1	3.54958	8.9313	11.6651	CTCF
chr2	70141180	70141542	MXD1	6.62009	9.02394	9.84857	CTCF
chr2	70142352	70143072	MXD1	19.5622	24.3248	25.3435	CTCF
chr2	70190940	70191264	MXD1	6.05311	5.6156	6.114	CTCF
chr2	70248548	70248827	MXD1	3.21452	2.46302	2.28144	CTCF
chr2	70248989	70249138	MXD1	4.76443	3.89942	4.94413	CTCF
chr2	70293138	70293525	MXD1	1.89119	3.24384	2.81755	CTCF
chr2	70301304	70301502	MXD1	4.47952	2.91284	2.67612	CTCF
chr2	70301987	70302218	MXD1	4.11815	4.90993	2.64987	CTCF
chr2	70303997	70304151	MXD1	4.26678	3.74554	2.34429	CTCF
chr2	70647992	70648126	MXD1	4.13478	2.33019	1.58067	CTCF
chr3	45511602	45511767	CCR1	0.74449	2.42664	2.09676	CTCF
chr3	45761239	45761427	CCR1	2.04502	2.3354	3.42395	CTCF
chr3	45938808	45939255	CCR1	7.19091	10.2727	11.6615	CTCF
chr3	46076746	46076932	CCR1	1.07168	3.33406	4.86961	CTCF
chr3	46078684	46079297	CCR1	7.39221	13.3142	15.1967	CTCF
chr3	46087942	46088428	CCR1	6.4105	21.4338	46.3913	CTCF
chr3	46100742	46101285	CCR1	0.567179	3.54392	13.4572	CTCF
chr3	46163099	46163224	CCR1	0.814451	0.77767	2.79632	CTCF
chr3	46183349	46183702	CCR1	2.65381	4.22527	9.03595	CTCF
chr3	46214785	46214915	CCR1	6.79977	7.44287	11.4117	CTCF
chr3	46222623	46223098	CCR1	2.35474	6.62376	8.39786	CTCF
chr3	46228752	46229296	CCR1	1.7307	4.33316	5.88134	CTCF
chr3	46293420	46293572	CCR1	0.788433	1.52046	3.87461	CTCF
chr3	46368514	46368937	CCR1	4.57563	18.1062	37.4384	CTCF
chr3	46372519	46372804	CCR1	6.92539	14.8189	27.1661	CTCF
chr3	46378365	46378661	CCR1	7.80286	9.34097	16.5445	CTCF
chr3	46447280	46447546	CCR1	0.222372	0.75937	3.6094	CTCF
chr3	46488732	46488992	CCR1	1.53309	1.82755	2.40565	CTCF
chr3	46558165	46558630	CCR1	2.14073	2.64293	4.26336	CTCF
chr3	101573730	101573829	NFKBIZ	2.09455	2.33514	0.988516	CTCF
chr3	101573980	101574205	NFKBIZ	2.83947	2.55234	1.80862	CTCF
chr3	101677081	101677439	NFKBIZ	1.58268	4.44256	3.6845	CTCF
chr3	101686648	101686976	NFKBIZ	1.27604	4.94063	4.15624	CTCF
chr3	101803302	101803428	NFKBIZ	5.12667	3.1953	4.04563	CTCF
chr3	101813839	101814001	NFKBIZ	4.33097	6.6963	16.6555	CTCF
chr3	101827236	101828150	NFKBIZ	6.44205	8.44673	12.8916	CTCF
chr3	102224310	102224478	NFKBIZ	3.30377	9.30707	14.1611	CTCF
chr3	102225516	102225672	NFKBIZ	4.59725	10.8979	15.0945	CTCF
chr3	172477435	172477561	TNFSF10	1.65807	2.18167	4.3424	CTCF
chr3	172490237	172490428	TNFSF10	5.92269	8.41536	17.4745	CTCF
chr3	172546696	172547129	TNFSF10	1.17718	4.67362	9.79681	CTCF
chr3	172578311	172578448	TNFSF10	1.11818	1.79223	5.65119	CTCF
chr3	172596051	172596367	TNFSF10	2.57805	5.69024	13.2452	CTCF
chr3	172666858	172667096	TNFSF10	1.17881	0.950252	3.00352	CTCF
chr3	172710995	172711344	TNFSF10	1.08703	1.94962	3.02973	CTCF
chr4	25441670	25441778	RBPJ	1.90831	1.11674	2.2757	CTCF
chr4	25842307	25842451	RBPJ	0.801621	1.13594	2.80395	CTCF
chr4	25925906	25926034	RBPJ	2.54927	2.21983	4.89764	CTCF
chr4	25988255	25988433	RBPJ	1.29795	1.51103	4.47447	CTCF
chr4	26020194	26020352	RBPJ	0.444589	1.09121	3.14233	CTCF
chr4	26028823	26029107	RBPJ	5.60096	7.78602	14.1597	CTCF
chr4	26061374	26061573	RBPJ	1.49634	2.69842	6.44344	CTCF
chr4	26082010	26082194	RBPJ	4.98082	8.5511	9.18093	CTCF
chr4	26150867	26151360	RBPJ	0.510899	3.56683	10.0198	CTCF
chr4	26288282	26288982	RBPJ	0.866171	4.60438	8.22514	CTCF
chr4	26330333	26330432	RBPJ	8.69697	8.40615	6.217	CTCF
chr4	26410804	26411022	RBPJ	3.06743	5.28741	5.26589	CTCF
chr4	26720077	26720212	RBPJ	3.1373	3.21325	3.93242	CTCF
chr4	27010469	27010603	RBPJ	1.94366	3.92235	2.69882	CTCF
chr4	40150002	40150132	RBM47	1.8938	1.66351	3.19208	CTCF
chr4	40719173	40719278	RBM47	2.4966	2.15514	10.848	CTCF
chr5	140239989	140240103	CD14	1.34539	2.73425	0.711067	CTCF
chr5	140244588	140244770	CD14	1.50749	2.99322	1.65135	CTCF
chr5	140372992	140373143	CD14	1.69591	3.37894	1.70231	CTCF
chr5	140547466	140547835	CD14	2.43251	12.9954	18.2922	CTCF
chr5	140547917	140548369	CD14	1.76671	6.4919	8.98763	CTCF
chr5	140557358	140557745	CD14	1.33232	7.35615	14.0497	CTCF
chr5	140575444	140575717	CD14	2.15132	7.06531	25.0916	CTCF
chr5	140635028	140635218	CD14	24.9873	42.2175	54.5304	CTCF
chr5	140639049	140639503	CD14	10.2268	18.1239	26.6954	CTCF
chr5	140691272	140691541	CD14	1.57986	1.99671	3.40562	CTCF
chr6	138816168	138816319	CITED2	3.33756	2.38093	1.59411	CTCF
chr6	139124975	139125225	CITED2	3.76342	4.51417	4.04146	CTCF
chr6	139219270	139219612	CITED2	6.17235	4.01938	5.84368	CTCF
chr6	139291845	139292122	CITED2	2.37909	1.75799	1.18342	CTCF
chr6	139364516	139364647	CITED2	7.26872	7.318	5.85376	CTCF
chr6	139881793	139881921	CITED2	0.90381	0.842758	3.53759	CTCF
chr6	139927376	139927566	CITED2	0.729365	0.734506	3.42094	CTCF
chr6	140441285	140441567	CITED2	0.832622	1.8491	9.55883	CTCF
chr6	140921634	140921906	CITED2	2.95518	3.20294	6.62618	CTCF
chr7	140175288	140175737	KDM7A	32.1852	39.9984	47.0359	CTCF
chr7	140239697	140239841	KDM7A	0.659627	5.28158	18.4285	CTCF
chr7	140252744	140253508	KDM7A	6.86987	19.8843	28.8097	CTCF
chr7	140304582	140304805	KDM7A	7.95864	12.5133	16.7356	CTCF
chr7	140326322	140326529	KDM7A	16.203	18.6553	26.3365	CTCF
chr7	140343189	140343377	KDM7A	7.98843	6.31786	11.382	CTCF
chr8	55313507	55313694	LYN	0.913478	1.67251	2.33985	CTCF
chr8	55773273	55773691	LYN	1.68898	3.0467	3.4778	CTCF
chr8	55815174	55815363	LYN	4.97157	4.52966	9.99892	CTCF
chr8	55818902	55819214	LYN	1.23488	2.86248	10.3014	CTCF
chr8	55885521	55885917	LYN	10.8472	22.9236	25.0081	CTCF
chr8	55930418	55930845	LYN	1.48646	4.22093	14.6437	CTCF
chr8	55939580	55940315	LYN	1.49427	3.881	8.48836	CTCF
chr8	55991198	55991493	LYN	0.873917	2.19695	6.08767	CTCF
chr8	56006527	56006799	LYN	1.65897	1.8828	3.26723	CTCF
chr8	56010673	56010823	LYN	3.02081	3.85991	4.86933	CTCF
chr8	56028843	56029095	LYN	4.57065	3.94688	5.71682	CTCF
chr8	56060233	56060356	LYN	2.66141	1.86322	2.81524	CTCF
chr8	56074370	56074707	LYN	3.62298	5.30799	4.45043	CTCF
chr8	56189305	56189440	LYN	1.5786	1.30109	2.71534	CTCF
chr8	114846732	114846875	TRPS1	1.00379	0.782958	2.5972	CTCF
chr8	115409986	115410148	TRPS1	1.40427	1.65046	4.40571	CTCF
chr8	115536995	115537102	TRPS1	0.133761	0.231513	2.85026	CTCF
chr8	116354397	116354496	TRPS1	0.0461365	0.145873	2.38523	CTCF
chr8	116354572	116354734	TRPS1	0.261561	0.481574	5.39311	CTCF
chr8	116447913	116448173	TRPS1	1.97674	1.08303	5.30039	CTCF
chr8	125091705	125091917	TRIB1	3.62962	4.22308	3.15196	CTCF
chr8	125118470	125118681	TRIB1	8.27394	7.6525	12.9824	CTCF
chr8	125119157	125119436	TRIB1	3.42772	5.08424	14.7083	CTCF
chr8	125230795	125230913	TRIB1	5.08367	5.83179	3.16756	CTCF
chr8	125352868	125353248	TRIB1	1.71529	3.52349	3.37528	CTCF
chr8	125385893	125386191	TRIB1	0.305423	1.20719	4.86456	CTCF
chr8	125417736	125418241	TRIB1	5.17438	7.18235	3.78468	CTCF
chr8	125505576	125505737	TRIB1	1.70483	3.49321	5.65956	CTCF
chr8	125644522	125644838	TRIB1	8.4743	9.72937	14.2214	CTCF
chr8	125696823	125696964	TRIB1	2.89038	4.34258	4.32302	CTCF
chr8	125700710	125700895	TRIB1	2.06254	3.63805	4.69202	CTCF
chr9	107422316	107422465	KLF4	2.43367	1.88163	2.09918	CTCF
chr9	107465685	107465843	KLF4	2.28574	2.75355	4.41367	CTCF
chr9	107487600	107487751	KLF4	20.8297	21.4828	25.2738	CTCF
chr9	107637561	107638307	KLF4	1.78848	4.89507	12.8592	CTCF
chr9	107674897	107675290	KLF4	0.267781	1.91289	5.99005	CTCF
chr9	107866762	107867363	KLF4	0.462096	4.61503	7.84551	CTCF
chr9	108272553	108272805	KLF4	1.43179	2.31193	9.86724	CTCF
chr9	108565766	108566048	KLF4	5.72685	5.64134	8.0209	CTCF
chr9	108671296	108671463	KLF4	5.46424	5.17466	3.88595	CTCF
chr9	108761740	108762070	KLF4	5.67721	5.43861	4.6751	CTCF
chr9	108814056	108814261	KLF4	2.70377	7.92646	8.7034	CTCF
chr9	109469783	109469904	KLF4	0.359861	2.84243	2.15464	CTCF
chr10	3172677	3172908	KLF6	2.29585	1.55609	1.4705	CTCF
chr10	3192985	3193101	KLF6	2.53459	2.23362	1.43812	CTCF
chr10	3197464	3197651	KLF6	2.20579	2.89804	2.73908	CTCF
chr10	3239707	3239939	KLF6	5.35027	5.17773	8.2131	CTCF
chr10	3455549	3455779	KLF6	4.68715	2.40947	2.77708	CTCF
chr10	3467497	3467667	KLF6	0.692811	2.11457	3.26527	CTCF
chr10	3484631	3484738	KLF6	3.05561	2.20512	1.39368	CTCF
chr10	3807342	3807480	KLF6	2.56208	9.25748	9.74763	CTCF
chr10	4344495	4344957	KLF6	0.249629	1.17392	4.19725	CTCF
chr10	4656643	4656860	KLF6	3.89996	5.37435	7.91297	CTCF
chr10	4767159	4767302	KLF6	3.71919	3.52512	7.92124	CTCF
chr10	4771296	4771420	KLF6	1.3865	1.56581	3.58053	CTCF
chr10	68955804	68955940	SRGN	4.00391	2.53	2.54705	CTCF
chr10	68956031	68956246	SRGN	4.62169	3.18914	3.17671	CTCF
chr10	68988571	68988932	SRGN	5.55076	4.94641	5.53861	CTCF
chr10	69004909	69005289	SRGN	6.7311	7.66815	11.2662	CTCF
chr10	69007332	69007538	SRGN	1.45068	6.27779	17.0414	CTCF
chr10	69057341	69057563	SRGN	1.77876	12.1899	12.5846	CTCF
chr10	69123337	69123549	SRGN	2.8506	4.30841	3.81109	CTCF
chr10	69123653	69124277	SRGN	5.54247	9.07793	11.7069	CTCF
chr10	69392583	69392771	SRGN	3.57391	3.40689	2.19078	CTCF
chr10	71888649	71889116	DDIT4	0.912988	2.55895	2.89615	CTCF
chr10	71896509	71896697	DDIT4	2.4609	3.50568	4.40556	CTCF
chr10	71956223	71956343	DDIT4	1.45926	1.55893	2.87371	CTCF
chr10	72048613	72048863	DDIT4	3.70434	4.4989	6.43844	CTCF
chr10	72126298	72126479	DDIT4	3.18333	2.83428	8.12152	CTCF
chr10	72132529	72132647	DDIT4	1.63444	1.59999	5.83824	CTCF
chr10	72215940	72216424	DDIT4	4.30301	4.2585	5.27785	CTCF
chr10	72222951	72223097	DDIT4	5.74404	6.41911	10.4228	CTCF
chr10	72255167	72255439	DDIT4	11.3759	10.8997	17.5902	CTCF
chr10	72260544	72260977	DDIT4	8.23183	9.10055	12.8346	CTCF
chr10	72261045	72261237	DDIT4	9.49853	6.73686	7.30426	CTCF
chr10	72328094	72328274	DDIT4	4.48813	9.0366	14.4536	CTCF
chr10	72328382	72328588	DDIT4	2.76159	7.19442	12.6404	CTCF
chr10	72331955	72332253	DDIT4	9.20214	7.23749	12.088	CTCF
chr10	72334858	72335366	DDIT4	9.53853	12.8639	12.4148	CTCF
chr10	72337249	72337381	DDIT4	5.24567	10.4366	16.3879	CTCF
chr10	72340531	72340689	DDIT4	6.90921	5.22274	10.7857	CTCF
chr10	72354916	72355128	DDIT4	2.84539	3.99064	4.46316	CTCF
chr10	72364394	72364575	DDIT4	1.93943	2.39054	1.97377	CTCF
chr10	97072956	97073102	FRAT2	4.64807	3.19194	5.46556	CTCF
chr10	97210632	97210746	FRAT2	4.40422	3.07138	5.18833	CTCF
chr10	97234520	97234659	FRAT2	4.76138	2.30559	4.55528	CTCF
chr10	97278623	97279024	FRAT2	13.9293	12.2054	18.776	CTCF
chr10	97292133	97292305	FRAT2	2.58522	5.72877	5.04557	CTCF
chr10	97292520	97292894	FRAT2	6.58505	6.77039	6.24195	CTCF
chr10	97319447	97319608	FRAT2	26.1241	28.8154	25.0186	CTCF
chr10	97320175	97320292	FRAT2	8.39054	6.29318	5.00559	CTCF
chr10	97355590	97355926	FRAT2	5.86643	8.58797	17.4858	CTCF
chr10	97356599	97356835	FRAT2	7.39859	9.39013	18.0765	CTCF
chr10	97401220	97401517	FRAT2	4.47858	5.95374	9.42303	CTCF
chr10	97407262	97407440	FRAT2	2.78758	5.02376	10.3117	CTCF
chr10	97426110	97426267	FRAT2	5.74532	3.85161	4.8603	CTCF
chr10	97445986	97446162	FRAT2	4.82446	3.40816	4.27465	CTCF
chr10	97543391	97543491	FRAT2	2.57409	1.80755	2.49588	CTCF
chr10	97553618	97553750	FRAT2	1.99204	3.1682	3.32396	CTCF
chr10	97612568	97612667	FRAT2	2.55691	2.67057	3.57819	CTCF
chr11	33808343	33808506	LMO2	4.47272	3.10593	4.42531	CTCF
chr11	33829649	33829775	LMO2	3.46291	2.04916	2.74967	CTCF
chr11	33835607	33835711	LMO2	1.83739	2.55672	3.32941	CTCF
chr11	33857891	33858187	LMO2	13.8237	12.0959	11.8258	CTCF
chr11	33942908	33943192	LMO2	0.980873	1.92653	6.05063	CTCF
chr11	33970981	33971740	LMO2	7.83377	15.9062	21.3185	CTCF
chr11	33984734	33984982	LMO2	2.27415	4.18673	7.84802	CTCF
chr11	33988063	33988248	LMO2	4.98138	4.94444	9.41473	CTCF
chr11	33997094	33997251	LMO2	2.80819	2.75443	4.55904	CTCF
chr11	34051385	34051523	LMO2	3.29354	3.18838	1.53964	CTCF
chr11	34051630	34051740	LMO2	3.16515	3.73267	1.80152	CTCF
chr11	34105387	34105765	LMO2	3.19069	3.83962	3.16742	CTCF
chr11	34359356	34359498	LMO2	2.81397	2.88023	3.09188	CTCF
chr11	59136003	59136141	MPEG	0.979608	2.29064	1.7735	CTCF
chr11	59144671	59144877	MPEG	1.09734	2.48652	2.71013	CTCF
chr11	59158408	59158734	MPEG	1.07543	3.33541	2.99752	CTCF
chr11	59171520	59171795	MPEG	6.14217	10.1747	11.6435	CTCF
chr11	59171912	59172256	MPEG	1.66531	4.90198	7.96208	CTCF
chr11	59200075	59200581	MPEG	2.97872	6.31821	8.58965	CTCF
chr11	59208073	59208172	MPEG	27.529	38.4214	49.6419	CTCF
chr11	59263407	59263513	MPEG	0.909661	3.96308	5.80415	CTCF
chr11	59281328	59281457	MPEG	0.460738	2.62474	6.55399	CTCF
chr11	59284302	59284797	MPEG	2.39129	7.67913	14.183	CTCF
chr11	59430045	59430229	MPEG	2.51638	6.51715	7.47742	CTCF
chr11	59680668	59680803	MPEG	1.55075	2.59145	2.736	CTCF
chr11	117807599	117807721	IL10RA	2.5309	2.14121	4.67343	CTCF
chr11	117817862	117817981	IL10RA	3.32528	5.31941	9.35653	CTCF
chr11	117819200	117819366	IL10RA	4.87015	3.91044	8.90084	CTCF
chr11	117823293	117823440	IL10RA	3.58815	2.61023	9.11863	CTCF
chr11	117823618	117823787	IL10RA	0.660769	1.51512	4.5968	CTCF
chr11	117844106	117844230	IL10RA	3.74369	2.52769	8.66446	CTCF
chr11	117904741	117904846	IL10RA	2.97301	1.72392	6.35128	CTCF
chr11	117946970	117947187	IL10RA	6.2396	5.92149	16.3075	CTCF
chr11	117950359	117950589	IL10RA	6.04949	5.06312	19.9648	CTCF
chr11	117979820	117980115	IL10RA	7.88054	9.64818	34.245	CTCF
chr11	118053416	118053683	IL10RA	5.97545	4.55333	19.4029	CTCF
chr12	7219777	7219933	CD163	3.02855	1.89285	6.32139	CTCF
chr12	7374659	7374760	CD163	0.500442	2.0367	2.37668	CTCF
chr12	7460728	7460887	CD163	2.5821	4.22187	8.13721	CTCF
chr12	7588775	7589092	CD163	0.671929	2.18245	5.64705	CTCF
chr12	7638728	7638945	CD163	2.27674	3.30037	9.08857	CTCF
chr12	15532527	15532644	EPS8	0.740142	1.6585	4.61257	CTCF
chr12	15584561	15584664	EPS8	0.661283	1.53389	4.21509	CTCF
chr12	15590447	15590775	EPS8	3.40739	4.09529	9.71073	CTCF
chr12	15856489	15856614	EPS8	10.4413	6.18909	12.029	CTCF
chr12	15899408	15899548	EPS8	2.70994	3.22234	2.9124	CTCF
chr15	49235679	49235842	ATP8B4	1.47056	1.00347	3.26429	CTCF
chr15	49620990	49621089	ATP8B4	0.360112	0.615492	3.05146	CTCF
chr15	50003841	50003948	ATP8B4	1.22203	1.93985	3.62626	CTCF
chr15	50128442	50128547	ATP8B4	2.78269	4.00699	12.7224	CTCF
chr15	50145470	50145606	ATP8B4	2.61041	3.71047	5.14238	CTCF
chr16	30985079	30985329	ITGAX	0.273506	1.24179	2.40117	CTCF
chr16	31074197	31074474	ITGAX	0.275998	1.86985	2.81759	CTCF
chr16	31095973	31096092	ITGAX	1.59806	0.728768	2.67172	CTCF
chr16	31142201	31142644	ITGAX	0.664271	1.16201	2.24157	CTCF
chr16	31200849	31201098	ITGAX	0.858038	2.73838	9.1094	CTCF
chr16	31259778	31260047	ITGAX	1.07206	3.51358	6.47529	CTCF
chr16	31265278	31265538	ITGAX	0.987102	2.07654	3.64215	CTCF
chr16	31333790	31333955	ITGAX	2.38004	3.35249	9.79424	CTCF
chr16	31357806	31358063	ITGAX	31.3907	31.8541	43.6119	CTCF
chr16	31382542	31382828	ITGAX	2.66836	6.5308	10.3789	CTCF
chr16	31442986	31443305	ITGAX	1.29937	2.91852	6.26262	CTCF
chr16	31451863	31451996	ITGAX	1.31786	1.55018	3.52543	CTCF
chr16	31459314	31459549	ITGAX	0.395611	1.20118	5.01562	CTCF
chr16	31696995	31697189	ITGAX	0.788771	1.61855	4.15622	CTCF
chr16	31868728	31868865	ITGAX	0.110197	0.827647	4.18445	CTCF
chr16	85799558	85799713	IRF8	1.37835	1.74091	2.85687	CTCF
chr16	85819291	85819490	IRF8	5.14443	5.6416	9.84296	CTCF
chr16	85821510	85821807	IRF8	7.17354	14.1265	23.8938	CTCF
chr16	85826605	85826723	IRF8	4.5353	6.89761	11.0874	CTCF
chr16	85832613	85832833	IRF8	3.70891	6.87085	7.3544	CTCF
chr16	85847862	85848031	IRF8	2.51212	4.48034	5.47307	CTCF
chr16	85859880	85860009	IRF8	0.583469	1.5185	5.07749	CTCF
chr16	85897510	85897733	IRF8	70.61	70.4871	77.9303	CTCF
chr16	85936232	85936387	IRF8	5.22075	5.5817	7.91809	CTCF
chr16	85987637	85987738	IRF8	3.7629	5.60044	7.73933	CTCF
chr16	86016433	86016671	IRF8	6.94997	8.03647	17.0835	CTCF
chr16	86072958	86073079	IRF8	0.750582	0.557582	2.29367	CTCF
chr16	86517817	86517938	IRF8	1.14387	2.05387	3.87049	CTCF
chr17	10117597	10117824	GAS7	7.40774	9.90346	20.702	CTCF
chr17	34171333	34171483	CCL2	1.25953	0.828748	2.59119	CTCF
chr17	34200041	34200341	CCL2	4.55153	6.08035	14.6228	CTCF
chr17	34361553	34361751	CCL2	2.45506	5.57834	12.7639	CTCF
chr19	33126007	33126133	CEBPa	5.94962	4.83686	3.70611	CTCF
chr19	33143985	33144144	CEBPa	4.29551	4.56746	4.57135	CTCF
chr19	33176911	33177149	CEBPa	5.88182	4.33901	4.28102	CTCF
chr19	33235338	33235554	CEBPa	12.9966	12.0468	17.8985	CTCF
chr19	33241587	33242095	CEBPa	3.41177	5.10557	8.26151	CTCF
chr19	33246020	33246242	CEBPa	3.79125	4.32164	9.98347	CTCF
chr19	33249149	33249274	CEBPa	2.89129	4.38285	10.6531	CTCF
chr19	33260762	33261098	CEBPa	8.12174	6.08142	8.68611	CTCF
chr19	33261640	33261787	CEBPa	4.82675	6.44843	3.94919	CTCF
chr19	33267968	33268088	CEBPa	6.64275	6.4027	7.50585	CTCF
chr19	33287058	33287287	CEBPa	4.64597	4.25646	7.8511	CTCF
chr19	33372140	33372280	CEBPa	4.94008	9.50246	16.0093	CTCF
chr19	33372371	33372632	CEBPa	4.48708	9.07576	25.5292	CTCF
chr19	33374237	33374336	CEBPa	4.12074	6.31331	14.7131	CTCF
chr19	33406860	33407101	CEBPa	9.98143	13.034	22.6919	CTCF
chr19	33416345	33416478	CEBPa	2.50557	4.46926	5.23471	CTCF
chr19	33430781	33430912	CEBPa	3.61077	2.92243	4.01627	CTCF
chr19	33771670	33771807	CEBPa	2.43621	2.76096	4.56061	CTCF
chr20	22334310	22334416	CD93	2.50457	1.13	2.88715	CTCF
chr20	22339229	22339377	CD93	2.07937	2.32178	4.74248	CTCF
chr20	22691721	22691938	CD93	2.25649	4.42853	5.65138	CTCF
chr20	23021664	23021801	CD93	0.820391	1.06644	3.72647	CTCF
chr20	23048607	23048717	CD93	3.07646	4.10711	3.29703	CTCF
chr20	23050886	23051058	CD93	3.41308	3.18218	6.00902	CTCF
chr20	23062235	23062384	CD93	4.94735	4.62407	11.0687	CTCF
chr20	23106531	23106755	CD93	1.52238	3.97258	5.11722	CTCF
chr20	23125571	23126042	CD93	9.70479	11.1989	12.0277	CTCF
chr20	23143134	23143354	CD93	1.85024	3.49867	7.47827	CTCF
chr20	23201028	23201191	CD93	3.73562	4.17495	1.94807	CTCF
chr20	23235506	23235676	CD93	3.56041	4.98078	7.74811	CTCF
chr20	23245710	23245958	CD93	1.79251	4.13052	4.86482	CTCF
chr20	23299388	23299578	CD93	3.52986	1.89966	0.681713	CTCF
chr20	23340564	23340783	CD93	4.26115	4.80041	7.70692	CTCF
chr20	23350155	23350320	CD93	1.33121	1.58942	2.75093	CTCF
chr20	23358022	23358274	CD93	1.77604	1.96862	2.30543	CTCF
chr20	31822925	31823034	HCK	2.42362	2.72431	4.43623	CTCF
chr20	31852796	31852938	HCK	2.79824	3.07013	4.79892	CTCF
chr20	31879726	31879848	HCK	1.41696	1.41949	2.24413	CTCF
chr20	31951996	31952236	HCK	2.53964	2.90602	2.43371	CTCF
chr20	31968521	31968699	HCK	1.06844	2.55344	1.87966	CTCF
chr20	32024826	32024938	HCK	3.35293	2.70795	2.94856	CTCF
chr20	32031623	32031753	HCK	5.86547	8.13653	11.5052	CTCF
chr20	32035146	32035425	HCK	4.93751	16.2538	29.0607	CTCF
chr20	32062743	32063157	HCK	3.43252	13.7557	21.2725	CTCF
chr20	32086361	32086477	HCK	2.77062	5.38287	6.54952	CTCF
chr20	32091882	32092199	HCK	5.01685	11.3706	16.473	CTCF
chr20	32155102	32155528	HCK	0.426523	1.18284	5.43601	CTCF
chr20	32652849	32653152	HCK	1.10609	2.32512	2.34684	CTCF
chr20	39048186	39048285	MAFB	2.63824	1.25376	1.97162	CTCF
chr20	39112175	39112364	MAFB	4.99834	4.10962	5.31802	CTCF
chr20	39264688	39264798	MAFB	2.46896	1.98147	2.5593	CTCF
chr20	39269064	39269213	MAFB	8.61795	7.83469	6.72743	CTCF
chr20	39829397	39829521	MAFB	1.40292	1.84285	4.06467	CTCF
chr20	39874133	39874308	MAFB	1.25204	1.21175	2.29733	CTCF
chr20	39886115	39886365	MAFB	6.11023	4.89756	9.14346	CTCF
chr20	40160123	40160447	MAFB	2.11209	4.74808	8.42837	CTCF
chr20	40266234	40266442	MAFB	5.42402	8.75696	5.31768	CTCF
chr20	40326722	40327185	MAFB	0.288672	2.15781	9.89682	CTCF
chr20	40470963	40471561	MAFB	1.51124	1.55424	4.41393	CTCF
chr20	40506502	40507105	MAFB	0.275725	5.31525	13.5068	CTCF
chr20	40532250	40532371	MAFB	2.33879	1.31787	2.66861	CTCF
chr20	40741660	40741761	MAFB	1.1811	1.72116	2.52326	CTCF
chr20	40946018	40946250	MAFB	7.48378	6.31334	7.90986	CTCF
chr20	40963023	40963241	MAFB	6.59394	4.74697	6.97664	CTCF
chr20	40968853	40968993	MAFB	2.41643	3.55804	2.08614	CTCF
chr1	12132914	12133389	TNFRSF1B	3.41465	6.97736	13.6008	Enhancer
chr1	12142820	12143115	TNFRSF1B	4.5609	5.15081	8.87315	Enhancer
chr1	12150566	12150717	TNFRSF1B	5.85454	10.9939	7.74966	Enhancer
chr1	12153240	12153606	TNFRSF1B	9.95533	11.732	17.6351	Enhancer
chr1	12161920	12162164	TNFRSF1B	30.3048	30.4093	37.84	Enhancer
chr1	12179003	12179335	TNFRSF1B	12.3015	13.2475	13.398	Enhancer
chr1	167548469	167548636	CREG1	6.54163	15.8861	36.5725	Enhancer
chr1	167563529	167563882	CREG1	2.86728	3.83575	17.3277	Enhancer
chr1	167584822	167584928	CREG1	2.09941	3.65711	1.98064	Enhancer
chr1	167601378	167601743	CREG1	1.41698	5.1086	9.95561	Enhancer
chr1	167632377	167632573	CREG1	0.973858	3.8995	6.75824	Enhancer
chr1	167650314	167650442	CREG1	1.52579	2.8764	2.44281	Enhancer
chr1	167714639	167714765	CREG1	5.9465	3.55622	4.67747	Enhancer
chr1	167753214	167753367	CREG1	2.9905	0.937891	1.87635	Enhancer
chr1	198500231	198500468	PTPRC	0.506041	0.444256	3.55329	Enhancer
chr1	198543650	198544053	PTPRC	0.502779	1.44389	8.02006	Enhancer
chr1	198550021	198550239	PTPRC	0.643199	0.586364	3.57693	Enhancer
chr1	198556946	198557278	PTPRC	0.607922	6.95182	12.3124	Enhancer
chr1	198597779	198597932	PTPRC	2.05557	3.73553	3.20098	Enhancer
chr1	198598781	198599295	PTPRC	2.95133	6.21019	3.06886	Enhancer
chr1	198622106	198622231	PTPRC	1.75009	4.90572	6.34138	Enhancer
chr1	198633986	198634166	PTPRC	7.03564	12.7117	24.9407	Enhancer
chr1	198651771	198652010	PTPRC	3.8035	13.4544	12.6206	Enhancer
chr1	198656679	198656875	PTPRC	2.12377	4.93832	7.50329	Enhancer
chr1	198657531	198657839	PTPRC	1.83137	4.57515	12.1471	Enhancer
chr1	198664393	198664803	PTPRC	2.11219	2.16913	6.08174	Enhancer
chr1	198681800	198682370	PTPRC	2.50046	12.1556	24.7034	Enhancer
chr2	27730587	27730718	FOSL2	1.62661	2.34998	0.338107	Enhancer
chr2	27756762	27757186	FOSL2	0.34204	2.90187	6.42901	Enhancer
chr2	27772974	27773081	FOSL2	0.700644	1.6018	3.01193	Enhancer
chr2	27809703	27810290	FOSL2	0.790647	4.91711	7.47085	Enhancer
chr2	27831311	27831687	FOSL2	0.260345	3.17203	4.62483	Enhancer
chr2	27832402	27832754	FOSL2	0.562105	2.53993	3.63896	Enhancer
chr2	27897871	27898033	FOSL2	0.613759	1.11919	4.53392	Enhancer
chr2	27920583	27920830	FOSL2	0.637009	1.13627	2.94391	Enhancer
chr2	27959457	27959791	FOSL2	1.02902	5.03038	10.3136	Enhancer
chr2	27960309	27960426	FOSL2	1.07876	3.9223	7.15919	Enhancer
chr2	28247257	28247717	FOSL2	6.09166	5.07438	1.42366	Enhancer
chr2	28248595	28248704	FOSL2	3.06909	0.880372	0.834124	Enhancer
chr2	28348268	28348393	FOSL2	2.592	1.55987	2.29265	Enhancer
chr2	28358557	28358711	FOSL2	4.66952	2.83948	2.23183	Enhancer
chr2	28359237	28359796	FOSL2	8.17817	5.76149	7.15657	Enhancer
chr2	28360480	28360682	FOSL2	4.96908	4.65911	3.75842	Enhancer
chr2	28360814	28360921	FOSL2	6.99532	3.98593	3.22247	Enhancer
chr2	28366664	28367160	FOSL2	10.0153	7.00059	4.82114	Enhancer
chr2	28409288	28409522	FOSL2	2.64764	2.65984	4.37834	Enhancer
chr2	28410226	28410661	FOSL2	8.14969	3.52838	2.18755	Enhancer
chr2	28423964	28424135	FOSL2	1.41656	1.68509	2.62534	Enhancer
chr2	28448211	28448630	FOSL2	0.612896	1.73689	5.50683	Enhancer
chr2	28463970	28464271	FOSL2	0.401515	2.55969	4.69492	Enhancer
chr2	64115868	64115999	PELI1	1.86561	1.59611	4.15475	Enhancer
chr2	64191828	64191956	PELI1	0.857562	1.58987	7.75466	Enhancer
chr2	64192122	64192407	PELI1	0.911378	4.01241	11.7753	Enhancer
chr2	64204178	64204599	PELI1	1.79808	4.15678	6.2757	Enhancer
chr2	64211443	64211584	PELI1	0.58908	2.65561	5.86443	Enhancer
chr2	64212365	64212725	PELI1	0.945002	5.05744	11.6375	Enhancer
chr2	64213023	64213254	PELI1	0.255548	1.87979	7.13928	Enhancer
chr2	64220353	64220572	PELI1	0.613311	1.78362	4.47026	Enhancer
chr2	64260795	64261157	PELI1	0.704338	5.10874	10.1754	Enhancer
chr2	64273528	64273894	PELI1	0.71127	6.35201	10.5294	Enhancer
chr2	64644441	64644564	PELI1	2.40383	2.08692	1.04765	Enhancer
chr2	69770306	69770507	MXD1	0.557679	0.982598	2.43835	Enhancer
chr2	69933583	69933699	MXD1	1.35751	3.91417	4.21663	Enhancer
chr2	69934395	69934661	MXD1	0.896705	3.41826	6.94623	Enhancer
chr2	69945524	69945646	MXD1	0.854588	0.977644	3.47362	Enhancer
chr2	69946569	69946840	MXD1	2.19489	3.86341	6.01847	Enhancer
chr2	70010363	70010571	MXD1	0.46473	0.59482	3.93239	Enhancer
chr2	70029811	70030372	MXD1	0.547334	2.03695	8.07915	Enhancer
chr2	70043343	70043891	MXD1	0.685096	4.35177	12.6352	Enhancer
chr2	70046635	70046801	MXD1	0.390839	4.27402	4.28332	Enhancer
chr2	70047528	70047664	MXD1	0.799957	2.44204	6.34731	Enhancer
chr2	70078605	70078726	MXD1	2.49732	6.16148	6.01314	Enhancer
chr2	70095197	70095471	MXD1	2.4585	4.8365	6.20531	Enhancer
chr2	70107884	70107983	MXD1	0.962189	3.36102	2.49159	Enhancer
chr2	70124048	70124359	MXD1	3.37726	4.10809	4.61188	Enhancer
chr2	70124437	70124786	MXD1	2.71127	3.84542	5.43366	Enhancer
chr2	70132599	70132718	MXD1	4.62329	4.26558	6.96044	Enhancer
chr2	70132881	70133001	MXD1	3.99291	2.2868	3.06644	Enhancer
chr2	70136017	70136143	MXD1	3.98949	5.54607	5.9339	Enhancer
chr2	70141907	70142009	MXD1	7.31745	6.9426	6.76249	Enhancer
chr2	70143308	70143653	MXD1	4.99529	7.18782	8.08305	Enhancer
chr3	46088797	46090037	CCR1	1.0744	9.85616	24.0948	Enhancer
chr3	46097882	46098193	CCR1	1.34719	5.38818	7.53074	Enhancer
chr3	46098462	46098834	CCR1	1.11861	8.57367	13.1564	Enhancer
chr3	46108975	46109123	CCR1	0.783098	1.68116	4.08537	Enhancer
chr3	46111146	46111496	CCR1	0.624578	1.5487	4.58206	Enhancer
chr3	46130530	46130969	CCR1	0.83506	1.92043	4.43007	Enhancer
chr3	46143967	46144331	CCR1	0.379687	1.2456	2.30148	Enhancer
chr3	46186813	46187367	CCR1	8.21957	8.70338	7.96948	Enhancer
chr3	46191820	46192207	CCR1	1.49876	6.52254	6.7762	Enhancer
chr3	46193520	46193671	CCR1	2.40087	3.39804	5.26747	Enhancer
chr3	46221492	46221806	CCR1	1.90877	7.61494	6.31768	Enhancer
chr3	46222063	46222204	CCR1	2.12455	4.73802	4.35028	Enhancer
chr3	46228241	46228668	CCR1	1.54421	8.13187	9.06779	Enhancer
chr3	46236306	46236655	CCR1	0.945651	1.37047	2.3332	Enhancer
chr3	46298150	46298332	CCR1	0.338544	0.836477	2.94775	Enhancer
chr3	46300221	46300585	CCR1	0.610583	1.06754	3.5074	Enhancer
chr3	46301185	46301417	CCR1	0.480557	1.21774	3.28486	Enhancer
chr3	46301551	46301704	CCR1	0.296469	0.530912	2.5847	Enhancer
chr3	46312921	46313389	CCR1	0.381606	2.40458	6.5906	Enhancer
chr3	46321501	46321828	CCR1	0.439201	2.82545	3.13094	Enhancer
chr3	46349792	46350213	CCR1	2.03712	2.36875	1.90578	Enhancer
chr3	46370869	46371014	CCR1	1.43271	1.99998	7.08823	Enhancer
chr3	46371243	46371374	CCR1	1.03757	2.61402	6.27207	Enhancer
chr3	101837301	101837495	NFKBIZ	2.54743	11.6793	23.9884	Enhancer
chr3	101850832	101850995	NFKBIZ	49.0087	36.9142	28.5347	Enhancer
chr3	101873625	101873763	NFKBIZ	0.454363	1.22808	5.32552	Enhancer
chr3	101880074	101880244	NFKBIZ	1.01809	1.94682	3.46998	Enhancer
chr3	101898738	101899172	NFKBIZ	2.02443	6.68236	10.0966	Enhancer
chr3	101936678	101937036	NFKBIZ	2.27129	13.4482	12.325	Enhancer
chr3	101938511	101938736	NFKBIZ	0.877675	7.71322	12.3031	Enhancer
chr3	101940655	101940851	NFKBIZ	1.93646	8.19444	10.4733	Enhancer
chr3	101942505	101942604	NFKBIZ	0.438457	4.92697	3.01205	Enhancer
chr3	101966253	101966554	NFKBIZ	0.0436282	1.00605	6.07179	Enhancer
chr3	102038539	102038668	NFKBIZ	0	1.38916	7.15436	Enhancer
chr3	102038769	102038886	NFKBIZ	0	0.943942	4.12723	Enhancer
chr3	102234080	102234198	NFKBIZ	7.95286	3.7303	0.493412	Enhancer
chr3	172512346	172512837	TNFSF10	8.49537	20.6553	29.5799	Enhancer
chr3	172530427	172530559	TNFSF10	7.70567	9.76135	12.4926	Enhancer
chr3	172530615	172530919	TNFSF10	7.43005	15.5626	19.0665	Enhancer
chr3	172538863	172539049	TNFSF10	2.04719	3.21447	6.03057	Enhancer
chr3	172558978	172559341	TNFSF10	1.78071	8.04242	14.0413	Enhancer
chr3	172562832	172563322	TNFSF10	0.972246	2.96107	8.09909	Enhancer
chr3	172568704	172569034	TNFSF10	0.722659	3.00239	5.88285	Enhancer
chr3	172578083	172578198	TNFSF10	1.24244	3.10965	5.45516	Enhancer
chr3	172580776	172580917	TNFSF10	0.619983	2.52523	4.13458	Enhancer
chr3	172586523	172586786	TNFSF10	0.453197	2.32973	4.52823	Enhancer
chr3	172592201	172592646	TNFSF10	3.06936	6.31249	8.39926	Enhancer
chr4	25861057	25861188	RBPJ	0.275578	1.47895	2.24595	Enhancer
chr4	26074729	26075032	RBPJ	1.36075	2.38021	11.8459	Enhancer
chr4	26075605	26075728	RBPJ	1.44792	0.632471	7.41793	Enhancer
chr4	26076207	26076661	RBPJ	0.768555	3.20617	12.8676	Enhancer
chr4	26088527	26088873	RBPJ	0.54753	2.52969	4.89889	Enhancer
chr4	26142058	26142257	RBPJ	0.713328	1.55911	2.71281	Enhancer
chr4	26197482	26197705	RBPJ	1.51793	1.52524	4.0849	Enhancer
chr4	26204356	26204495	RBPJ	0.941703	2.59529	1.34514	Enhancer
chr4	26218137	26218436	RBPJ	0.735853	2.99638	6.08022	Enhancer
chr4	26218954	26219242	RBPJ	0.197395	2.36814	5.07101	Enhancer
chr4	26261446	26261773	RBPJ	0.436592	1.42544	4.67778	Enhancer
chr4	26273142	26273292	RBPJ	1.55178	3.51978	3.78956	Enhancer
chr4	26273612	26273930	RBPJ	3.09035	6.2407	5.29568	Enhancer
chr4	26287869	26288095	RBPJ	0.766233	1.80823	4.84647	Enhancer
chr4	26302567	26302824	RBPJ	1.28569	1.96061	6.42986	Enhancer
chr4	26322101	26322283	RBPJ	27.2939	19.6561	30.4607	Enhancer
chr4	40486687	40486930	RBM47	0	1.23268	2.57127	Enhancer
chr4	40554095	40554283	RBM47	0.418443	2.2807	4.12326	Enhancer
chr4	40574009	40574142	RBM47	2.66509	3.39243	6.81525	Enhancer
chr4	40577090	40577499	RBM47	1.19449	1.89694	6.95229	Enhancer
chr4	40621811	40621971	RBM47	9.65348	9.78572	14.1007	Enhancer
chr4	40672972	40673121	RBM47	0.949598	2.59551	3.68872	Enhancer
chr4	40711078	40711230	RBM47	0.758006	1.22059	4.20689	Enhancer
chr4	40731855	40732044	RBM47	0.311178	1.09807	4.80087	Enhancer
chr5	140251488	140251743	CD14	0.826563	2.80116	1.21639	Enhancer
chr5	140555862	140556105	CD14	1.29387	3.46834	7.23323	Enhancer
chr5	140569332	140569471	CD14	1.51006	4.56239	6.93023	Enhancer
chr5	140576541	140576678	CD14	1.2075	3.14369	6.77902	Enhancer
chr5	140576789	140576984	CD14	1.35082	4.43263	9.91133	Enhancer
chr5	140588409	140588596	CD14	0.859441	2.29499	9.4615	Enhancer
chr5	140589244	140589571	CD14	1.06687	2.21072	13.2677	Enhancer
chr5	140592046	140592287	CD14	1.39762	2.84656	10.418	Enhancer
chr5	140595535	140595905	CD14	1.42162	5.08254	12.9	Enhancer
chr5	140602970	140603249	CD14	1.08351	3.04798	9.71755	Enhancer
chr5	140608813	140608955	CD14	0.900057	4.34909	10.9567	Enhancer
chr5	140609198	140609532	CD14	1.76916	11.8146	19.9874	Enhancer
chr5	140611274	140611574	CD14	1.65217	5.62766	11.6317	Enhancer
chr5	140611970	140612397	CD14	3.69244	17.2206	39.0121	Enhancer
chr5	140631265	140631390	CD14	19.5881	24.049	30.2872	Enhancer
chr6	139290754	139291017	CITED2	2.3775	2.13802	2.15793	Enhancer
chr6	139323620	139324230	CITED2	3.20781	2.70498	1.98868	Enhancer
chr6	139540323	139540577	CITED2	1.57527	1.26335	2.52967	Enhancer
chr6	139764520	139764941	CITED2	0.395625	0.849908	3.05666	Enhancer
chr6	139839485	139839787	CITED2	0.251036	1.8854	4.84192	Enhancer
chr6	139841882	139842131	CITED2	0.385281	1.22589	3.47503	Enhancer
chr6	140039460	140039643	CITED2	0.0620337	0.696778	2.93084	Enhancer
chr7	140210264	140210627	KDM7A	4.02128	7.59291	14.8667	Enhancer
chr7	140232162	140232261	KDM7A	0.596751	4.55267	9.52029	Enhancer
chr7	140232874	140233274	KDM7A	0.904958	9.12519	10.5667	Enhancer
chr7	140242089	140242272	KDM7A	2.3105	8.27142	14.3359	Enhancer
chr7	140390869	140391175	KDM7A	3.94439	4.10397	4.05742	Enhancer
chr8	55844025	55844779	LYN	4.38017	5.45059	10.9832	Enhancer
chr8	55844978	55845571	LYN	3.21053	3.8233	8.48981	Enhancer
chr8	55884126	55884236	LYN	8.33338	17.6451	31.5719	Enhancer
chr8	55919574	55919865	LYN	5.23616	3.98162	3.99988	Enhancer
chr8	55924570	55924811	LYN	1.7545	4.75409	5.09404	Enhancer
chr8	55972855	55973411	LYN	1.26494	2.79376	4.87274	Enhancer
chr8	55975655	55975913	LYN	1.18386	2.5084	5.13099	Enhancer
chr8	55976012	55976150	LYN	3.78934	2.08916	2.3123	Enhancer
chr8	56005515	56005674	LYN	1.11957	2.10775	2.82487	Enhancer
chr8	115056331	115056639	TRPS1	0	0.300572	2.63932	Enhancer
chr8	115427493	115428076	TRPS1	0.368276	1.83605	5.19824	Enhancer
chr8	115451419	115451645	TRPS1	0.980811	1.29247	3.92229	Enhancer
chr8	115451826	115451993	TRPS1	0.730694	0.757466	5.7418	Enhancer
chr8	115452206	115452374	TRPS1	4.43317	2.23575	3.51134	Enhancer
chr8	115576504	115576655	TRPS1	0.188662	0.443417	3.16034	Enhancer
chr8	115614933	115615069	TRPS1	0.162753	0.657343	2.70882	Enhancer
chr8	115846457	115846938	TRPS1	0.223422	1.08311	5.66664	Enhancer
chr8	115877488	115877645	TRPS1	0.291496	1.31744	4.36709	Enhancer
chr8	115878383	115878514	TRPS1	0.151588	0.329977	2.95968	Enhancer
chr8	115978395	115978592	TRPS1	0.287067	0.691614	3.51369	Enhancer
chr8	125110879	125111099	TRIB1	0.713131	1.55052	2.58263	Enhancer
chr8	125163451	125163698	TRIB1	0.0097792	1.05937	2.79542	Enhancer
chr8	125183262	125183361	TRIB1	0.402353	0.211328	3.18413	Enhancer
chr8	125188244	125188354	TRIB1	0.325312	1.4468	4.05057	Enhancer
chr8	125191825	125192197	TRIB1	0.32864	2.73688	4.76689	Enhancer
chr8	125219281	125219622	TRIB1	0.231854	1.02119	7.62579	Enhancer
chr8	125219874	125220260	TRIB1	0.701796	1.1931	3.86373	Enhancer
chr8	125309795	125309911	TRIB1	0.781368	0.597593	4.04988	Enhancer
chr8	125341451	125341582	TRIB1	0.894845	1.65108	9.28421	Enhancer
chr8	125342187	125342633	TRIB1	0.578126	3.66173	17.5262	Enhancer
chr8	125344027	125344264	TRIB1	0.37376	1.6358	11.0899	Enhancer
chr8	125362872	125363046	TRIB1	1.36103	2.21296	5.33498	Enhancer
chr8	125410645	125410832	TRIB1	0.83219	3.59244	5.53942	Enhancer
chr8	125410997	125411139	TRIB1	0.692755	3.23472	7.80311	Enhancer
chr8	125440248	125440444	TRIB1	1.69243	4.59388	4.39508	Enhancer
chr8	125467048	125467215	TRIB1	1.49803	1.60444	3.76103	Enhancer
chr8	125506189	125506373	TRIB1	1.03791	3.95802	3.22071	Enhancer
chr8	125512950	125513421	TRIB1	0.0709992	12.3715	9.20643	Enhancer
chr8	125637529	125637631	TRIB1	0.965684	1.19633	3.55052	Enhancer
chr9	107513386	107513690	KLF4	1.07478	1.07547	4.36217	Enhancer
chr9	107548479	107548623	KLF4	1.20399	1.32909	2.2569	Enhancer
chr9	107612154	107612443	KLF4	0.590156	4.39461	6.34658	Enhancer
chr9	107615238	107615718	KLF4	0.352773	2.32318	6.81704	Enhancer
chr9	107636986	107637297	KLF4	2.17099	4.94074	6.12923	Enhancer
chr9	107644880	107645417	KLF4	1.25096	2.03376	6.37148	Enhancer
chr9	107675569	107675737	KLF4	0.260343	0.83093	3.9327	Enhancer
chr9	107683686	107683906	KLF4	0.325083	1.19262	3.28483	Enhancer
chr9	107708099	107708269	KLF4	0.265157	2.12566	2.93781	Enhancer
chr9	107749866	107750093	KLF4	0.597213	0.561269	4.33157	Enhancer
chr9	107750724	107750926	KLF4	0.734279	0.5682	6.2098	Enhancer
chr9	107760661	107760774	KLF4	0.128115	0.901695	3.74796	Enhancer
chr9	107760887	107761269	KLF4	0.407465	1.11719	6.80342	Enhancer
chr9	107774157	107774470	KLF4	0.254474	0.850012	2.7054	Enhancer
chr9	107782886	107783019	KLF4	0.443123	1.80955	2.76215	Enhancer
chr9	107841088	107841431	KLF4	0.473227	1.48549	2.66179	Enhancer
chr9	107848556	107848960	KLF4	0.2606	0.740764	4.17138	Enhancer
chr9	107874720	107874919	KLF4	0.767638	1.62802	3.10635	Enhancer
chr9	108156621	108156833	KLF4	0.331335	1.25102	2.37018	Enhancer
chr9	108272234	108272394	KLF4	0.726807	0.506291	3.54492	Enhancer
chr9	108579983	108580301	KLF4	1.08986	3.01922	5.21615	Enhancer
chr9	108645547	108645830	KLF4	2.16973	2.9271	0.897451	Enhancer
chr9	108816260	108816414	KLF4	0.327583	2.53075	2.39689	Enhancer
chr9	108835021	108835210	KLF4	2.60783	1.91546	1.3775	Enhancer
chr10	3424507	3424751	KLF6	1.65003	2.81625	2.22919	Enhancer
chr10	3468207	3468597	KLF6	1.18955	2.9857	3.98992	Enhancer
chr10	3469064	3469493	KLF6	1.19509	2.55511	4.78736	Enhancer
chr10	3532679	3532945	KLF6	2.93913	1.59054	1.29856	Enhancer
chr10	3554106	3554369	KLF6	3.2608	2.22714	0.744326	Enhancer
chr10	3720492	3721000	KLF6	0.943064	2.0059	2.59102	Enhancer
chr10	3765154	3765404	KLF6	2.61648	3.18793	2.67647	Enhancer
chr10	3776337	3776487	KLF6	1.61847	7.39648	2.35545	Enhancer
chr10	3782695	3783239	KLF6	26.2986	36.3362	31.4272	Enhancer
chr10	3783430	3783615	KLF6	30.8248	31.4538	27.6821	Enhancer
chr10	3783891	3784317	KLF6	28.7395	32.4051	32.3221	Enhancer
chr10	3804015	3804152	KLF6	3.23005	7.14562	10.1959	Enhancer
chr10	3804448	3804726	KLF6	4.21629	7.36287	7.53739	Enhancer
chr10	3805189	3805586	KLF6	4.36722	10.6081	21.2217	Enhancer
chr10	3805723	3806207	KLF6	7.08162	10.1573	8.63768	Enhancer
chr10	3811285	3811417	KLF6	3.47903	4.22313	5.41945	Enhancer
chr10	3811494	3811704	KLF6	6.40606	5.19864	7.03141	Enhancer
chr10	3828848	3829134	KLF6	3.38001	3.04461	2.46511	Enhancer
chr10	3835953	3836082	KLF6	0.287743	0.906086	2.50408	Enhancer
chr10	3851207	3851884	KLF6	0.547111	3.01555	12.0367	Enhancer
chr10	3852236	3852798	KLF6	0.634458	2.1414	8.48887	Enhancer
chr10	3873763	3874006	KLF6	1.49895	1.60601	11.8936	Enhancer
chr10	3875147	3875295	KLF6	1.6268	1.84401	5.63005	Enhancer
chr10	3980666	3980991	KLF6	0.327242	1.01683	3.71537	Enhancer
chr10	4006091	4006432	KLF6	0.429961	0.309358	3.59289	Enhancer
chr10	4018067	4018481	KLF6	0.346392	0.664222	2.74796	Enhancer
chr10	4121695	4122054	KLF6	0.424711	0.390335	4.34857	Enhancer
chr10	4130642	4131101	KLF6	3.77183	10.8462	7.11881	Enhancer
chr10	4131302	4131809	KLF6	2.47306	6.0159	7.71255	Enhancer
chr10	4131891	4132149	KLF6	0.738419	3.33321	5.89089	Enhancer
chr10	4149421	4149622	KLF6	5.81137	2.61922	2.34615	Enhancer
chr10	4333479	4333792	KLF6	0.363989	1.34942	3.07731	Enhancer
chr10	4514525	4514831	KLF6	0.521754	2.9349	3.63577	Enhancer
chr10	4663104	4663449	KLF6	3.13367	5.00953	5.34647	Enhancer
chr10	4770799	4771048	KLF6	0.301346	1.38931	3.97836	Enhancer
chr10	68957043	68957281	SRGN	1.67329	2.15548	3.45339	Enhancer
chr10	69012930	69013084	SRGN	1.15589	2.1205	3.66826	Enhancer
chr10	69045441	69045936	SRGN	1.09099	4.65979	18.7875	Enhancer
chr10	69048113	69048432	SRGN	1.15379	4.75663	18.8244	Enhancer
chr10	69049690	69049870	SRGN	1.51243	2.90045	13.2383	Enhancer
chr10	69052140	69052352	SRGN	0.693374	2.58072	9.34065	Enhancer
chr10	69061341	69061935	SRGN	4.87961	29.0946	42.3914	Enhancer
chr10	69065443	69066307	SRGN	4.1103	14.6906	14.2834	Enhancer
chr10	69072981	69073421	SRGN	3.47876	15.3673	15.2899	Enhancer
chr10	69073924	69074042	SRGN	2.89326	5.8374	6.26271	Enhancer
chr10	69101780	69102083	SRGN	1.6078	3.22659	4.3743	Enhancer
chr10	69124840	69125014	SRGN	2.78311	3.06362	4.67147	Enhancer
chr10	71836182	71836568	DDIT4	1.71021	2.46436	1.0636	Enhancer
chr10	71852634	71852763	DDIT4	0.519297	1.92535	2.60615	Enhancer
chr10	72175323	72175422	DDIT4	0.245776	0.425217	2.4564	Enhancer
chr10	72223642	72224099	DDIT4	1.17224	3.66191	8.79912	Enhancer
chr10	72248488	72249112	DDIT4	14.5141	9.77707	7.82542	Enhancer
chr10	72261535	72261635	DDIT4	9.45117	7.11855	8.74741	Enhancer
chr10	72275367	72275652	DDIT4	35.6163	22.7392	16.9841	Enhancer
chr10	72286314	72286449	DDIT4	7.10787	5.16846	3.46421	Enhancer
chr10	72286562	72286691	DDIT4	4.68838	7.0216	5.8351	Enhancer
chr10	72297164	72297612	DDIT4	19.0514	15.3881	14.1903	Enhancer
chr10	72298020	72298249	DDIT4	9.73618	8.37374	10.0317	Enhancer
chr10	72308533	72308880	DDIT4	2.22839	5.37536	8.57971	Enhancer
chr10	72320478	72320595	DDIT4	7.80941	7.14558	4.1711	Enhancer
chr10	72320702	72321122	DDIT4	11.979	15.4182	14.8501	Enhancer
chr10	72334288	72334437	DDIT4	7.95378	8.1447	5.62491	Enhancer
chr10	72335535	72335780	DDIT4	9.26758	9.35842	12.607	Enhancer
chr10	96652099	96652203	FRAT2	1.08737	1.05893	2.51323	Enhancer
chr10	97218178	97218277	FRAT2	3.52227	2.07791	2.44068	Enhancer
chr10	97275000	97275115	FRAT2	6.0197	6.0738	8.65794	Enhancer
chr10	97277696	97277814	FRAT2	7.86393	4.41666	6.60599	Enhancer
chr10	97321464	97321682	FRAT2	9.03075	16.1007	15.2482	Enhancer
chr10	97365665	97366128	FRAT2	2.01987	10.0576	11.1653	Enhancer
chr10	97376458	97376732	FRAT2	1.52916	2.99031	8.18608	Enhancer
chr10	97400150	97400269	FRAT2	2.15457	4.20036	8.63018	Enhancer
chr10	97406161	97406353	FRAT2	0.759307	5.20092	6.4578	Enhancer
chr11	33893649	33894373	LMO2	12.8987	25.1388	22.1084	Enhancer
chr11	33907622	33907784	LMO2	1.76408	1.74921	4.66713	Enhancer
chr11	33912386	33912573	LMO2	2.40721	3.46603	6.4686	Enhancer
chr11	33912768	33913145	LMO2	2.37748	5.06227	8.15197	Enhancer
chr11	33921196	33921705	LMO2	4.73932	4.95133	6.03884	Enhancer
chr11	33930139	33931054	LMO2	2.39015	13.2429	12.272	Enhancer
chr11	33936845	33937022	LMO2	1.39396	3.30289	6.44253	Enhancer
chr11	33937386	33937532	LMO2	2.13186	4.37155	5.69779	Enhancer
chr11	33941643	33941973	LMO2	1.56623	3.23318	6.54262	Enhancer
chr11	33959976	33960104	LMO2	1.07456	5.59677	4.13898	Enhancer
chr11	59145659	59145839	MPEG	0.516792	2.04472	5.22645	Enhancer
chr11	59216609	59217174	MPEG	15.8575	39.1507	54.0687	Enhancer
chr11	59222562	59223032	MPEG	2.89328	8.32833	22.798	Enhancer
chr11	59224652	59224951	MPEG	2.07694	3.99312	14.4393	Enhancer
chr11	59247464	59248191	MPEG	0.578293	6.3688	12.5303	Enhancer
chr11	59254376	59254589	MPEG	0.785977	3.90049	6.9022	Enhancer
chr11	59273425	59273720	MPEG	0.894985	4.33512	7.74416	Enhancer
chr11	59289345	59289796	MPEG	1.21035	0.972401	2.65778	Enhancer
chr11	59368758	59368955	MPEG	0.545032	2.59381	2.42904	Enhancer
chr11	59380633	59380848	MPEG	0.961097	1.83626	2.987	Enhancer
chr11	117814986	117815085	IL10RA	1.80494	2.89636	1.80139	Enhancer
chr11	117815446	117815625	IL10RA	1.67615	3.91409	4.36365	Enhancer
chr11	117951074	117951173	IL10RA	7.20808	6.73322	8.46942	Enhancer
chr11	117959472	117959647	IL10RA	1.34863	3.43873	16.4562	Enhancer
chr11	117959756	117960012	IL10RA	1.50927	1.72329	8.86351	Enhancer
chr11	117970733	117970969	IL10RA	7.26534	9.6084	13.3773	Enhancer
chr11	117977185	117977394	IL10RA	5.61567	10.3419	11.7876	Enhancer
chr11	117987487	117987588	IL10RA	35.4399	32.2878	35.4848	Enhancer
chr11	117994435	117994690	IL10RA	2.74675	6.02583	12.8552	Enhancer
chr11	118002884	118003016	IL10RA	2.83669	4.85561	7.77389	Enhancer
chr11	118007716	118008937	IL10RA	2.22655	2.61216	4.26178	Enhancer
chr11	118010991	118011258	IL10RA	4.13344	5.59238	17.5487	Enhancer
chr11	118088641	118088919	IL10RA	0.496012	1.1806	3.48715	Enhancer
chr12	7369334	7369640	CD163	0.820151	2.51337	2.26649	Enhancer
chr12	7498835	7499128	CD163	10.7515	36.3911	59.7326	Enhancer
chr12	7510949	7511103	CD163	4.55809	8.45147	13.3843	Enhancer
chr12	7512598	7513024	CD163	3.9679	6.60267	25.6573	Enhancer
chr12	7542780	7543265	CD163	1.40622	5.40246	21.7784	Enhancer
chr12	7555709	7556174	CD163	1.05508	5.18544	17.9008	Enhancer
chr12	7557322	7557556	CD163	0.95811	5.38723	13.5451	Enhancer
chr12	7571187	7571786	CD163	0.597679	1.04027	10.8455	Enhancer
chr12	7609647	7609771	CD163	0	0.718779	2.83133	Enhancer
chr12	7675553	7675721	CD163	0.314617	2.54738	1.50959	Enhancer
chr12	15527302	15527490	EPS8	0.726375	1.42881	2.49169	Enhancer
chr12	15628653	15628807	EPS8	0.745631	1.14607	2.2424	Enhancer
chr12	15700616	15700868	EPS8	1.64006	4.16794	9.87106	Enhancer
chr12	15726092	15726292	EPS8	0.432399	0.772701	5.64773	Enhancer
chr15	50055493	50055592	ATP8B4	1.30969	2.62091	4.67392	Enhancer
chr15	50107691	50107944	ATP8B4	2.66047	3.69935	7.76284	Enhancer
chr15	50134664	50134981	ATP8B4	3.4372	4.76239	7.83232	Enhancer
chr16	31113212	31113422	ITGAX	0.379421	1.40786	2.45889	Enhancer
chr16	31128839	31129178	ITGAX	0.436227	1.05161	3.52324	Enhancer
chr16	31236711	31236858	ITGAX	1.67425	2.59417	2.74839	Enhancer
chr16	31244070	31244350	ITGAX	0.809493	2.69214	4.36538	Enhancer
chr16	31253643	31254086	ITGAX	0.785442	3.14136	7.57545	Enhancer
chr16	31301821	31301931	ITGAX	0.97892	0.519154	4.03094	Enhancer
chr16	31302016	31302382	ITGAX	1.0519	4.05007	14.4226	Enhancer
chr16	31352079	31352322	ITGAX	9.70596	19.5351	48.9083	Enhancer
chr16	31352514	31352709	ITGAX	13.3677	25.3118	58.021	Enhancer
chr16	31366984	31367152	ITGAX	4.55523	6.83648	10.077	Enhancer
chr16	31367813	31368309	ITGAX	2.39129	9.1007	24.5076	Enhancer
chr16	31869515	31869851	ITGAX	0.919141	0.944632	3.18696	Enhancer
chr16	31870060	31870185	ITGAX	0.139067	0.585374	2.79311	Enhancer
chr16	85829620	85830088	IRF8	2.451	7.04287	7.68698	Enhancer
chr16	85853620	85853929	IRF8	2.25841	4.09463	7.28621	Enhancer
chr16	85854192	85854330	IRF8	1.42493	3.97697	5.53618	Enhancer
chr16	85868520	85868727	IRF8	6.09621	4.01206	3.74981	Enhancer
chr16	85870195	85870351	IRF8	3.53715	4.10156	7.33769	Enhancer
chr16	85870744	85870926	IRF8	2.32364	4.13454	6.21486	Enhancer
chr16	85888834	85889179	IRF8	8.71197	11.3586	15.2553	Enhancer
chr16	85928388	85928751	IRF8	3.38056	7.21873	9.67492	Enhancer
chr16	85936513	85936753	IRF8	3.22422	3.50554	5.74383	Enhancer
chr16	85972674	85972908	IRF8	5.70626	3.85766	3.93845	Enhancer
chr16	85978505	85978699	IRF8	0.67008	2.14432	7.27059	Enhancer
chr16	85982619	85982854	IRF8	2.19735	5.97101	7.57138	Enhancer
chr16	86018588	86018866	IRF8	1.30282	2.01869	5.33196	Enhancer
chr17	10064035	10064141	GAS7	4.72761	4.04307	3.94174	Enhancer
chr17	10136160	10136287	GAS7	2.22458	5.52431	7.20369	Enhancer
chr17	10156940	10157197	GAS7	9.85033	5.70711	14.6473	Enhancer
chr17	10157269	10157444	GAS7	4.00266	3.24757	10.5645	Enhancer
chr17	10172610	10172737	GAS7	6.24933	17.6177	11.6141	Enhancer
chr17	34201287	34201505	CCL2	1.22098	3.58946	7.99681	Enhancer
chr17	34221192	34221291	CCL2	0.393332	1.12907	5.63451	Enhancer
chr17	34242615	34242975	CCL2	3.5288	9.13591	13.1392	Enhancer
chr17	34246541	34246750	CCL2	3.11179	9.71315	15.9607	Enhancer
chr19	33208646	33208757	CEBPa	2.72122	2.37697	2.33898	Enhancer
chr19	33268662	33268761	CEBPa	4.57233	4.47827	7.24844	Enhancer
chr19	33274011	33274377	CEBPa	6.89314	7.13696	10.0679	Enhancer
chr19	33280579	33280784	CEBPa	4.457	5.04071	7.69484	Enhancer
chr19	33293358	33293522	CEBPa	8.25602	13.9761	20.7272	Enhancer
chr19	33332041	33332579	CEBPa	1.74663	4.67692	15.0136	Enhancer
chr20	22984629	22984896	CD93	2.82472	2.77444	1.84501	Enhancer
chr20	23103377	23103574	CD93	2.98084	7.88955	10.0761	Enhancer
chr20	23126336	23126506	CD93	2.35144	5.83094	5.25443	Enhancer
chr20	23142277	23142533	CD93	0.891732	2.95307	5.53236	Enhancer
chr20	23147971	23148161	CD93	1.18444	2.9779	5.24325	Enhancer
chr20	23195742	23195967	CD93	0.593131	2.20894	3.22306	Enhancer
chr20	23225379	23225903	CD93	0.685205	3.84499	6.04197	Enhancer
chr20	23247383	23247500	CD93	1.40206	3.77807	2.35847	Enhancer
chr20	23258539	23258791	CD93	0.938389	2.58281	2.91715	Enhancer
chr20	23332091	23332307	CD93	1.35274	3.4215	2.72474	Enhancer
chr20	32040132	32040978	HCK	6.10736	23.8105	31.5713	Enhancer
chr20	32068796	32069356	HCK	4.97667	24.0917	34.0021	Enhancer
chr20	32069876	32069999	HCK	3.94999	5.20877	13.7062	Enhancer
chr20	32077211	32077561	HCK	2.22964	8.45545	14.4545	Enhancer
chr20	32439567	32439706	HCK	5.08906	1.77727	0.407196	Enhancer
chr20	39886732	39887140	MAFB	1.29152	2.35183	7.15473	Enhancer
chr20	39909583	39909904	MAFB	0.264504	0.666943	2.3121	Enhancer
chr20	40279399	40279661	MAFB	0.375137	0.770791	3.62655	Enhancer
chr20	40339981	40340531	MAFB	0.354851	1.2394	7.7758	Enhancer
chr20	40427155	40427290	MAFB	0.42329	0.7308	2.7361	Enhancer
chr20	40436800	40437082	MAFB	0.341824	1.38331	5.03955	Enhancer
chr20	40470432	40470540	MAFB	1.20624	1.37954	3.95616	Enhancer
chr20	40470682	40470866	MAFB	1.64897	1.91256	3.9357	Enhancer
chr20	40497869	40498058	MAFB	0.580413	2.68737	6.10429	Enhancer
chr20	40498148	40498770	MAFB	0.503615	5.93102	11.569	Enhancer
chr20	40687337	40687776	MAFB	17.8583	20.137	29.3364	Enhancer
chr20	40687906	40688133	MAFB	22.4129	25.3527	27.3297	Enhancer
chr20	40719419	40719710	MAFB	1.19275	4.971	2.42969	Enhancer
chr20	40882292	40882510	MAFB	2.82887	2.3061	0.306073	Enhancer
chr20	40942151	40942266	MAFB	0.664932	1.01609	2.25496	Enhancer
chr20	40961895	40962091	MAFB	0.438936	1.50835	2.42017	Enhancer
chr1	12125746	12125973	TNFRSF1B	1.67464	4.19173	7.84991	Promoter
chr1	198157559	198157745	PTPRC	0.255192	1.65281	2.37779	Promoter
chr2	27771555	27772017	FOSL2	2.19317	2.84415	3.08982	Promoter
chr2	27890375	27891361	FOSL2	2.64952	3.10527	5.5712	Promoter
chr2	63588736	63589012	PELI1	2.40107	2.05594	1.12727	Promoter
chr2	64524076	64524340	PELI1	3.17573	2.54784	2.8471	Promoter
chr2	69893810	69894059	MXD1	9.76208	6.95036	4.89752	Promoter
chr2	70086211	70087479	MXD1	5.8989	9.09421	11.4439	Promoter
chr2	70181347	70181722	MXD1	2.30955	1.79448	2.12811	Promoter
chr2	70190216	70190834	MXD1	4.0074	3.76279	3.2218	Promoter
chr2	70248153	70248355	MXD1	2.57319	2.72716	2.24437	Promoter
chr2	70293591	70293934	MXD1	5.62367	4.91874	5.05635	Promoter
chr3	101724862	101724991	NFKBIZ	1.30532	1.6948	2.35429	Promoter
chr4	26319105	26319392	RBPJ	20.2894	27.4578	30.928	Promoter
chr5	140564546	140564868	CD14	1.23058	4.44759	9.82893	Promoter
chr5	140647536	140647945	CD14	2.72485	4.51419	6.32763	Promoter
chr5	140664293	140664942	CD14	1.33754	2.10818	3.37852	Promoter
chr5	140711100	140711451	CD14	0.84919	1.31272	2.61774	Promoter
chr6	139134922	139135152	CITED2	2.88577	2.47368	2.10409	Promoter
chr7	140479354	140479455	KDM7A	0.686035	3.55604	2.33628	Promoter
chr8	115667652	115667774	TRPS1	38.6694	32.8763	32.5167	Promoter
chr10	69179860	69180314	SRGN	4.09435	4.38619	4.08233	Promoter
chr10	72354533	72354723	DDIT4	3.2735	3.07976	2.86435	Promoter
chr10	97318907	97319343	FRAT2	13.6181	14.0911	15.5033	Promoter
chr10	97498395	97498494	FRAT2	0.286638	0.959121	2.89019	Promoter
chr11	33891854	33892165	LMO2	4.49876	14.9204	14.8704	Promoter
chr11	34052269	34052435	LMO2	4.11738	4.09394	3.11432	Promoter
chr11	34053419	34053562	LMO2	2.82222	2.47626	2.81642	Promoter
chr11	34357935	34358196	LMO2	2.45003	2.82258	1.42476	Promoter
chr11	117828774	117828886	IL10RA	2.80478	4.44012	2.91231	Promoter
chr12	7189484	7189688	CD163	0.954935	2.10116	2.35644	Promoter
chr12	7444105	7444415	CD163	0.747568	0.947269	2.24196	Promoter
chr12	14384963	14385071	EPS8	2.79499	1.9249	0.832807	Promoter
chr12	15882216	15882453	EPS8	3.17116	2.14908	3.34142	Promoter
chr16	30957540	30957749	ITGAX	0.192333	0.621218	2.46014	Promoter
chr16	31032841	31033530	ITGAX	0.169857	0.569232	3.19083	Promoter
chr16	31094810	31095034	ITGAX	0.155896	1.89691	2.92999	Promoter
chr16	31108265	31108450	ITGAX	0.756266	0.976835	2.29546	Promoter
chr16	31117494	31117699	ITGAX	0.334026	1.09273	2.99957	Promoter
chr16	31179778	31180223	ITGAX	1.0584	2.16984	6.32573	Promoter
chr16	31180609	31180783	ITGAX	0.315707	2.87215	3.7482	Promoter
chr16	31202271	31202423	ITGAX	0.936792	3.094	4.2022	Promoter
chr16	31214507	31214619	ITGAX	0.998306	0.612589	3.26498	Promoter
chr16	85913732	85913954	IRF8	4.54435	6.7978	7.0888	Promoter
chr19	33373446	33373635	CEBPa	4.17441	7.82686	13.0659	Promoter
chr20	23350631	23350752	CD93	2.5606	2.49034	2.01193	Promoter
chr20	31880089	31880198	HCK	0.988452	1.69196	3.20132	Promoter
chr20	32052842	32053120	HCK	23.1997	46.2505	54.6024	Promoter
chr20	32109394	32109790	HCK	2.79953	5.08059	4.95416	Promoter

## Sheet: Fig. 1g
Figure 1g. Interaction frequencies of promoters of B-cell-specific genes.
chr	start	end	viewpoint	0h	24h	96h	annotation
chr2	58762287	58762482	BCL11A	3.03444	2.49435	5.38995	CTCF
chr2	59025297	59025421	BCL11A	1.67968	1.84694	3.64666	CTCF
chr2	59301948	59302103	BCL11A	1.4709	2.34482	5.03758	CTCF
chr2	60413875	60414090	BCL11A	0.655574	1.74917	2.84127	CTCF
chr2	60439418	60439750	BCL11A	0.57268	2.22903	2.92147	CTCF
chr2	60515734	60516239	BCL11A	1.33947	3.55548	4.72195	CTCF
chr2	60555055	60555281	BCL11A	92.2641	65.724	57.2957	CTCF
chr2	60565614	60565729	BCL11A	5.48598	5.66903	8.16481	CTCF
chr2	60581798	60582145	BCL11A	4.46483	4.35712	5.91952	CTCF
chr2	60642424	60642574	BCL11A	2.49414	1.66813	1.40034	CTCF
chr2	60674653	60674838	BCL11A	4.77433	6.23524	10.0041	CTCF
chr2	60675442	60675550	BCL11A	1.4343	1.87866	2.66281	CTCF
chr2	60999044	60999197	BCL11A	2.71504	2.42703	3.0589	CTCF
chr2	233976765	233977002	ARL4C	18.3465	14.2879	17.3548	CTCF
chr2	234135723	234136096	ARL4C	15.3469	13.8935	14.7455	CTCF
chr2	234136626	234136754	ARL4C	9.57844	4.55941	6.60681	CTCF
chr2	234189099	234189448	ARL4C	6.54194	2.12117	2.00362	CTCF
chr2	234191910	234192172	ARL4C	9.07882	2.47004	1.50974	CTCF
chr2	234258277	234258449	ARL4C	2.67123	2.96012	3.01233	CTCF
chr2	234289045	234289248	ARL4C	8.49659	11.7603	16.8777	CTCF
chr2	234483584	234484237	ARL4C	10.7265	7.59421	5.36689	CTCF
chr2	234545004	234545162	ARL4C	3.9681	2.4095	2.42688	CTCF
chr2	234550601	234550890	ARL4C	3.55631	3.30159	1.99527	CTCF
chr2	235117000	235117178	ARL4C	1.59969	1.95589	2.76234	CTCF
chr4	15479106	15479205	CD38	2.77001	1.57267	1.12776	CTCF
chr4	15730044	15730251	CD38	13.8959	8.9423	7.24472	CTCF
chr4	15756351	15756808	CD38	12.3332	6.21341	5.65258	CTCF
chr4	15805724	15805848	CD38	10.1489	8.01403	6.79925	CTCF
chr4	15956318	15956519	CD38	6.59479	3.47047	2.4955	CTCF
chr4	16001524	16001644	CD38	1.91021	3.40336	4.62393	CTCF
chr5	35089807	35090006	IL7R	3.66795	2.31448	3.45045	CTCF
chr5	35651223	35651472	IL7R	4.81341	2.96207	2.13376	CTCF
chr5	35777724	35777993	IL7R	4.9786	3.88993	5.65711	CTCF
chr5	35922088	35922192	IL7R	5.6139	4.22447	6.42544	CTCF
chr5	35924874	35925213	IL7R	13.3597	8.4509	8.28113	CTCF
chr5	35926523	35926715	IL7R	8.70024	4.72023	4.61058	CTCF
chr5	36403963	36404391	IL7R	2.514	3.29381	1.26694	CTCF
chr5	158075380	158075491	EBF1	1.13927	2.50402	4.44672	CTCF
chr5	158175035	158175289	EBF1	1.69426	7.45037	6.91868	CTCF
chr5	158194572	158194994	EBF1	4.38401	1.97537	0.90298	CTCF
chr5	158695626	158695933	EBF1	0.905558	6.20309	12.0579	CTCF
chr5	159049981	159050101	EBF1	1.00919	2.67977	4.81259	CTCF
chr5	159133262	159133399	EBF1	5.58175	3.66428	3.19005	CTCF
chr6	134156882	134157030	MYB	3.51311	2.44042	3.08388	CTCF
chr6	134641053	134641188	MYB	1.35972	2.26211	1.84651	CTCF
chr6	135087390	135087713	MYB	16.3541	3.93603	3.68953	CTCF
chr6	135145095	135145227	MYB	10.5581	6.07572	9.91133	CTCF
chr6	135183892	135184102	MYB	47.8447	34.6684	32.0295	CTCF
chr6	135423748	135423946	MYB	5.80205	6.92144	13.0431	CTCF
chr6	135439035	135439164	MYB	5.60009	6.03647	7.06901	CTCF
chr8	11413831	11413959	BLK	5.206	2.87941	7.11019	CTCF
chr8	11467700	11467844	BLK	4.22693	3.72536	4.70294	CTCF
chr8	11480234	11480479	BLK	9.23665	7.98615	8.06156	CTCF
chr8	11481773	11482032	BLK	3.48022	6.4161	10.2592	CTCF
chr8	11482181	11482319	BLK	11.0427	6.34242	6.6121	CTCF
chr8	11537590	11538077	BLK	13.4781	4.01116	4.82063	CTCF
chr8	11545726	11546125	BLK	10.088	5.02414	4.29026	CTCF
chr8	11553794	11553981	BLK	12.3392	10.9566	14.5447	CTCF
chr8	11558625	11559104	BLK	10.8416	4.26475	4.93695	CTCF
chr8	11589562	11589719	BLK	2.33059	1.7328	1.75352	CTCF
chr8	11746460	11746572	BLK	2.43057	2.25059	2.77102	CTCF
chr9	36873394	36873550	PAX5	3.68529	4.5537	4.20659	CTCF
chr9	36991712	36991832	PAX5	8.54812	6.59536	4.03076	CTCF
chr9	36995961	36996432	PAX5	3.75814	5.7449	9.06172	CTCF
chr9	37079754	37080050	PAX5	4.79477	3.89378	6.71643	CTCF
chr9	37191813	37191937	PAX5	1.68358	4.27309	5.66814	CTCF
chr9	37262540	37262652	PAX5	1.40762	3.75645	5.72974	CTCF
chr9	37329695	37329847	PAX5	4.22771	8.97332	9.10263	CTCF
chr9	73200828	73200941	RORB	0.996804	1.35971	2.35929	CTCF
chr9	73683977	73684108	RORB	1.62203	1.69144	4.14949	CTCF
chr9	74309792	74309931	RORB	7.12891	4.62512	3.20739	CTCF
chr9	74478658	74478927	RORB	9.93722	4.34337	2.69331	CTCF
chr9	74498477	74498596	RORB	28.9523	36.4549	41.67	CTCF
chr9	74571047	74571191	RORB	8.04906	7.73025	9.09178	CTCF
chr9	74645149	74645248	RORB	2.33865	1.68946	3.07737	CTCF
chr9	75077278	75077382	RORB	1.08595	2.53898	2.40936	CTCF
chr10	95693926	95694258	DNTT	2.29852	0.866492	0.775169	CTCF
chr10	96017315	96017533	DNTT	4.56118	2.75549	2.06041	CTCF
chr10	96229649	96229884	DNTT	9.71413	4.91003	3.29701	CTCF
chr10	96293440	96293543	DNTT	12.7648	8.45873	8.87614	CTCF
chr11	36540975	36541350	RAG2	4.56655	1.3268	1.32411	CTCF
chr11	36574591	36574750	RAG2	15.1349	8.00711	4.4254	CTCF
chr11	36622888	36623008	RAG2	25.6071	9.74967	8.54025	CTCF
chr11	36672891	36673095	RAG2	2.45804	0.932223	0.91181	CTCF
chr11	36747163	36747341	RAG2	3.95935	1.9831	2.06946	CTCF
chr12	24949028	24949217	LRMP	3.09829	5.05235	5.01426	CTCF
chr12	24949308	24949421	LRMP	1.205	2.31726	2.67762	CTCF
chr12	24960323	24960561	LRMP	3.99765	5.4362	7.27917	CTCF
chr12	24991592	24991798	LRMP	13.3347	8.87698	11.0126	CTCF
chr12	25023924	25024113	LRMP	14.7492	4.92507	4.5214	CTCF
chr12	25119142	25119273	LRMP	0.570125	1.29041	3.71692	CTCF
chr12	25130811	25130954	LRMP	1.89418	2.55164	5.6192	CTCF
chr12	25155184	25155336	LRMP	1.11639	2.01301	2.73976	CTCF
chr12	25386105	25386413	LRMP	1.13865	3.45104	3.69947	CTCF
chr12	25387595	25387694	LRMP	0.943475	2.88071	2.5958	CTCF
chr18	62584456	62584767	BCL2	3.71327	1.65158	2.3793	CTCF
chr18	62586311	62586454	BCL2	4.23577	4.79358	8.08111	CTCF
chr18	62714938	62715352	BCL2	3.97606	3.87354	3.22622	CTCF
chr18	62982773	62982873	BCL2	1.72366	5.31054	2.92886	CTCF
chr18	63016353	63016559	BCL2	20.682	15.5708	16.9444	CTCF
chr18	63073621	63073737	BCL2	5.25725	2.89174	2.30776	CTCF
chr18	63099969	63100439	BCL2	14.5498	4.06296	2.10164	CTCF
chr18	63119681	63119868	BCL2	10.9859	12.005	14.7775	CTCF
chr18	63131170	63131445	BCL2	2.73394	4.15068	10.069	CTCF
chr18	63155546	63155677	BCL2	5.05831	4.58792	7.42753	CTCF
chr18	63162477	63162698	BCL2	1.54453	3.39152	6.50356	CTCF
chr18	63318125	63318352	BCL2	64.6484	43.059	37.466	CTCF
chr18	63342322	63342451	BCL2	4.92487	5.53996	3.25978	CTCF
chr18	63367258	63367357	BCL2	1.38326	2.76534	4.30571	CTCF
chr18	63367492	63367889	BCL2	4.72979	6.07649	6.63942	CTCF
chr18	63422372	63422737	BCL2	4.86296	6.11274	5.20257	CTCF
chr18	63439356	63439505	BCL2	4.64865	5.5697	10.829	CTCF
chr18	63848278	63848391	BCL2	1.55725	2.48054	3.53268	CTCF
chr22	22594140	22594240	IGLL5	2.81903	2.76339	2.56856	CTCF
chr22	22753659	22753789	IGLL5	5.77355	2.42076	3.12597	CTCF
chr22	22935549	22935980	IGLL1	18.8413	5.04753	3.78368	CTCF
chr22	22942796	22943103	IGLL5	19.2936	8.0872	8.27939	CTCF
chr22	22943481	22943670	IGLL5	7.76809	2.80307	1.98687	CTCF
chr22	22954770	22954961	IGLL5	6.70294	4.4389	4.06284	CTCF
chr22	22956036	22956136	IGLL5	8.13469	5.59212	8.61781	CTCF
chr22	23269834	23270082	IGLL1	2.41953	0.286646	0.603562	CTCF
chr22	23539674	23539865	IGLL1	6.04905	5.33893	3.11338	CTCF
chr22	23541864	23542022	IGLL1	4.74636	2.52295	2.15696	CTCF
chr22	23565421	23565534	IGLL1	3.37781	3.97579	3.60606	CTCF
chr22	23565675	23565986	IGLL1	4.00348	2.69977	3.04383	CTCF
chr22	23583779	23584211	IGLL1	62.7752	7.49497	7.45182	CTCF
chr22	23591139	23591368	IGLL1	11.8948	6.07463	6.90832	CTCF
chr22	23627592	23627702	IGLL1	1.28566	1.04013	2.72411	CTCF
chr22	23753429	23753560	IGLL1	4.67992	0.959366	0.938168	CTCF
chr22	23766713	23766880	IGLL1	3.55796	1.92406	1.52966	CTCF
chr22	23849609	23849809	IGLL1	3.06029	2.11389	1.11613	CTCF
chr22	23956660	23956804	IGLL1	3.04101	1.27325	1.36344	CTCF
chr2	59413717	59414470	BCL11A	2.85249	0.461753	0.426376	Enhancer
chr2	60100028	60100420	BCL11A	4.93269	2.31549	0.633508	Enhancer
chr2	60400444	60400776	BCL11A	2.69048	1.46884	0.712553	Enhancer
chr2	60530705	60531352	BCL11A	9.31609	9.52454	6.2504	Enhancer
chr2	60551900	60552057	BCL11A	21.5885	40.825	41.9409	Enhancer
chr2	60587660	60587794	BCL11A	2.36368	0.396228	0.576725	Enhancer
chr2	234098814	234098925	ARL4C	4.68567	2.18581	1.61005	Enhancer
chr2	234099361	234099512	ARL4C	5.08647	2.68457	1.06626	Enhancer
chr2	234147530	234147947	ARL4C	14.0664	1.87194	2.03688	Enhancer
chr2	234164520	234164945	ARL4C	13.0729	3.63425	3.24246	Enhancer
chr2	234290723	234290915	ARL4C	8.71771	6.858	6.74496	Enhancer
chr2	234291808	234292238	ARL4C	13.2688	7.27585	6.09123	Enhancer
chr2	234292543	234292740	ARL4C	11.5827	7.75641	7.19098	Enhancer
chr2	234425925	234426286	ARL4C	8.74434	4.79647	3.01713	Enhancer
chr2	234437779	234438054	ARL4C	4.2228	1.37734	0.568987	Enhancer
chr2	234445072	234445248	ARL4C	4.85575	4.30884	3.13445	Enhancer
chr2	234475583	234475725	ARL4C	4.31403	0.697132	0.839803	Enhancer
chr4	15754463	15754594	CD38	12.6761	5.71024	3.29311	Enhancer
chr4	15766311	15766511	CD38	10.0114	8.91203	7.10661	Enhancer
chr4	15930465	15930623	CD38	2.62385	0.710558	1.09847	Enhancer
chr5	35673226	35673333	IL7R	2.61384	1.22869	0.657021	Enhancer
chr5	35803222	35803430	IL7R	2.30499	2.40669	1.86281	Enhancer
chr5	35869689	35870023	IL7R	2.85413	8.2848	8.5487	Enhancer
chr5	35876480	35876703	IL7R	1.12458	4.29294	4.96901	Enhancer
chr5	35884140	35884767	IL7R	7.81205	11.7361	8.9114	Enhancer
chr5	35884890	35885079	IL7R	3.91932	5.42523	4.2745	Enhancer
chr5	35899955	35900085	IL7R	6.03486	4.83247	2.18017	Enhancer
chr5	35908249	35909214	IL7R	12.954	4.08939	2.23608	Enhancer
chr5	35909548	35909681	IL7R	6.43571	1.68985	1.54228	Enhancer
chr5	36059953	36060199	IL7R	2.26837	1.23998	0.384044	Enhancer
chr5	158390637	158390862	EBF1	2.55365	2.15271	2.69901	Enhancer
chr5	158398600	158398811	EBF1	2.33114	1.76852	0.655322	Enhancer
chr5	158513637	158513767	EBF1	3.33442	1.6292	1.40803	Enhancer
chr5	158765541	158765697	EBF1	2.74494	0.854722	1.63259	Enhancer
chr5	158812543	158812703	EBF1	3.35045	3.08728	2.46796	Enhancer
chr5	158846017	158846315	EBF1	0.824247	4.20061	1.56875	Enhancer
chr5	159097975	159098177	EBF1	34.0858	40.0333	41.1829	Enhancer
chr5	159099057	159099176	EBF1	29.8066	30.2847	32.3535	Enhancer
chr6	135044714	135045022	MYB	8.43584	4.55294	2.72506	Enhancer
chr6	135087794	135088174	MYB	12.6551	3.74446	1.81246	Enhancer
chr6	135105783	135106006	MYB	7.29119	2.14531	0.755013	Enhancer
chr6	135114329	135114705	MYB	11.6741	3.63837	1.69632	Enhancer
chr6	135128631	135128782	MYB	4.57868	2.58945	1.48452	Enhancer
chr8	11492098	11492242	BLK	40.3226	37.2924	32.0659	Enhancer
chr8	11492596	11492920	BLK	52.5535	40.6361	34.5751	Enhancer
chr8	11508893	11509145	BLK	10.1784	6.87173	4.84978	Enhancer
chr8	11538146	11538311	BLK	9.97063	2.78095	4.60885	Enhancer
chr8	11558353	11558482	BLK	6.04065	2.56081	2.0977	Enhancer
chr8	11642430	11642605	BLK	2.94891	0.883674	0.603894	Enhancer
chr9	36997484	36997722	PAX5	4.30254	6.54034	8.62396	Enhancer
chr9	37025729	37025833	PAX5	21.7659	24.6316	33.199	Enhancer
chr9	37144793	37145052	PAX5	7.58142	3.03968	2.66534	Enhancer
chr9	37197180	37197580	PAX5	4.13311	3.67286	4.31247	Enhancer
chr9	37284014	37284238	PAX5	3.47866	1.32482	0.844815	Enhancer
chr9	37294181	37294446	PAX5	3.78944	4.76351	1.10278	Enhancer
chr9	74245824	74246116	RORB	3.33778	0.416074	0.435806	Enhancer
chr9	74333552	74333909	RORB	5.47091	2.75093	2.96609	Enhancer
chr9	74338130	74338295	RORB	4.44971	1.38954	0.968582	Enhancer
chr10	96235741	96236033	DNTT	8.76043	2.18048	1.58704	Enhancer
chr10	96236137	96236494	DNTT	8.02302	3.32597	3.12148	Enhancer
chr10	96238469	96238826	DNTT	9.17029	2.20995	1.17436	Enhancer
chr10	96244427	96244647	DNTT	3.41058	0.923338	1.1471	Enhancer
chr10	96287737	96288044	DNTT	6.90151	2.12856	1.75897	Enhancer
chr10	96306586	96306768	DNTT	56.1987	41.6312	38.9552	Enhancer
chr11	36573776	36573975	RAG2	20.3839	7.23668	7.69122	Enhancer
chr11	36605623	36605787	RAG2	14.5863	8.30163	5.10759	Enhancer
chr11	36605936	36606041	RAG2	11.5286	5.8604	5.64026	Enhancer
chr11	36618304	36618703	RAG2	10.2801	3.57744	2.84982	Enhancer
chr11	36618834	36619080	RAG2	10.7392	4.67638	3.68331	Enhancer
chr11	36619386	36620077	RAG2	24.7422	6.07852	3.96158	Enhancer
chr11	36620186	36620491	RAG2	10.6657	4.18783	4.02835	Enhancer
chr12	24948611	24948755	LRMP	2.04976	2.83411	2.48361	Enhancer
chr12	24997386	24997588	LRMP	13.6557	3.55008	4.31612	Enhancer
chr12	24998061	24998621	LRMP	27.4105	8.2743	8.9359	Enhancer
chr12	25020593	25021027	LRMP	25.9271	10.1299	5.59157	Enhancer
chr12	25051361	25051469	LRMP	29.6017	28.3201	32.6908	Enhancer
chr12	25054189	25054340	LRMP	63.5137	41.0732	34.1711	Enhancer
chr12	25100113	25100348	LRMP	0.581646	3.29562	4.59769	Enhancer
chr12	25108091	25108267	LRMP	0.427765	1.6811	2.73688	Enhancer
chr12	25385531	25385758	LRMP	1.75495	2.91707	3.53213	Enhancer
chr12	25386592	25386801	LRMP	0.61847	2.32937	1.23419	Enhancer
chr18	62998597	62998787	BCL2	1.92505	2.98867	0.807306	Enhancer
chr18	63098630	63098838	BCL2	14.5166	7.43887	2.66309	Enhancer
chr18	63138090	63138786	BCL2	11.5028	6.2658	4.00507	Enhancer
chr18	63141851	63142066	BCL2	3.65852	7.70479	12.2397	Enhancer
chr18	63178600	63178865	BCL2	2.75925	5.8809	1.41042	Enhancer
chr22	22248967	22249169	IGLL1	2.8638	0.428419	0.183371	Enhancer
chr22	22850000	22850141	IGLL5	3.58218	1.99473	1.23622	Enhancer
chr22	22865723	22865996	IGLL5	5.14668	1.10353	1.27906	Enhancer
chr22	22928749	22929146	IGLL1	9.993	5.2439	4.00735	Enhancer
chr22	22931885	22932282	IGLL5	12.883	2.7031	0.888071	Enhancer
chr22	23579154	23579500	IGLL1	45.5325	39.0113	36.8036	Enhancer
chr22	23583257	23583540	IGLL1	42.912	14.2633	21.3153	Enhancer
chr22	23696242	23696701	IGLL1	4.51349	0.946353	0.804814	Enhancer
chr22	23752126	23753002	IGLL1	12.5104	1.21659	0.749238	Enhancer
chr22	23844354	23844773	IGLL1	5.55619	0.706901	0.789285	Enhancer
chr22	23846784	23846883	IGLL1	2.45727	0.196431	0.734404	Enhancer
chr22	25317777	25318110	IGLL1	1.79747	1.85931	2.68739	Enhancer
chr2	233854494	233854833	ARL4C	3.26871	2.41957	1.41053	Promoter
chr5	157859090	157859221	EBF1	1.77706	2.28698	2.89717	Promoter
chr6	135054649	135055068	MYB	9.05737	6.35031	9.12972	Promoter
chr8	11466773	11466883	BLK	2.48564	2.2643	2.26793	Promoter
chr9	37120113	37120678	PAX5	6.72368	4.82163	5.45845	Promoter
chr11	36567874	36568109	RAG2	14.0012	2.41362	2.53313	Promoter
chr18	62522871	62523012	BCL2	1.65418	2.49042	2.3576	Promoter
chr18	63161831	63162108	BCL2	0.495319	3.04238	8.75936	Promoter
chr22	23839132	23839482	IGLL1	2.35126	1.3584	0.239955	Promoter

## Sheet: Fig. 1h-i
Figure 1h-i. Correlation between differential enhancer-promoter interaction frequencies and differential Mediator/cohesin binding levels.
differential interaction frequency	differential Mediator binding level	differential cohesin binding level	label
1.99388	2.97538	1.78446	96h vs 0h
0.960127	3.1076	1.72076	96h vs 0h
0.404577	2.18891	2.30539	96h vs 0h
0.824906	2.00855	2.49506	96h vs 0h
0.320366	0.132677	0.866027	96h vs 0h
0.123183	-0.818055	0.457349	96h vs 0h
2.48304	7.71886	4.76772	96h vs 0h
2.59532	5.80145	5.24706	96h vs 0h
-0.0840132	1.18635	0.715204	96h vs 0h
2.81269	2.91933	1.48178	96h vs 0h
2.79486	0.584409	0.793498	96h vs 0h
0.678988	-1.56702	-1.3043	96h vs 0h
-0.346311	-0.014052	-0.170006	96h vs 0h
-0.672455	-3.03249	-1.92304	96h vs 0h
2.81183	3.71052	3.39874	96h vs 0h
3.99562	4.74452	2.98411	96h vs 0h
2.47538	5.72596	2.37384	96h vs 0h
4.34008	0.883387	1.95047	96h vs 0h
0.638977	-0.644558	-0.0815011	96h vs 0h
0.0563375	-3.33264	-2.43713	96h vs 0h
1.85737	0.00788537	-0.173	96h vs 0h
1.82575	4.05836	3.66984	96h vs 0h
1.73038	3.52897	2.48744	96h vs 0h
1.82089	4.72066	3.64729	96h vs 0h
2.72962	7.65806	3.38681	96h vs 0h
1.52574	6.40927	2.4331	96h vs 0h
3.30444	1.60471	0.958545	96h vs 0h
-2.26632	-0.972924	-0.57952	96h vs 0h
4.23236	5.92136	4.15405	96h vs 0h
2.10394	3.43279	2.27855	96h vs 0h
3.24016	3.76997	3.60681	96h vs 0h
4.1509	5.23713	4.16687	96h vs 0h
2.69462	3.95846	3.45696	96h vs 0h
2.88501	4.1514	2.16925	96h vs 0h
2.20835	2.46947	3.39723	96h vs 0h
3.32521	2.21537	2.78117	96h vs 0h
2.73042	1.80975	2.01973	96h vs 0h
-2.09723	-2.82667	-1.56801	96h vs 0h
-1.87948	-3.95094	-1.95406	96h vs 0h
-0.177047	-0.513354	0.263135	96h vs 0h
-1.06505	-0.525457	0.47148	96h vs 0h
-0.192509	0.200243	1.34723	96h vs 0h
-0.402851	0.598425	0.020536	96h vs 0h
-1.11822	0.630879	0.384717	96h vs 0h
-1.05476	-1.5181	-0.363824	96h vs 0h
0.725676	1.14329	1.89882	96h vs 0h
-1.89743	-2.85895	-0.626593	96h vs 0h
0.890106	2.72507	2.27301	96h vs 0h
3.16751	6.35809	3.5786	96h vs 0h
3.54757	5.47528	3.98388	96h vs 0h
-2.74202	-4.386	-4.03748	96h vs 0h
-2.96094	-4.03059	-2.66403	96h vs 0h
-1.91679	-4.25579	-2.3109	96h vs 0h
-0.575774	-0.539042	-0.671899	96h vs 0h
0.958098	-1.47001	0.415508	96h vs 0h
-2.03508	-3.70641	-3.10862	96h vs 0h
1.15511	4.15885	3.61553	96h vs 0h
3.17675	7.70826	5.45484	96h vs 0h
3.69157	7.02863	5.21936	96h vs 0h
1.80332	3.32782	2.15409	96h vs 0h
3.31545	6.39254	3.2971	96h vs 0h
3.62232	7.0953	4.9222	96h vs 0h
4.80411	6.07889	4.98854	96h vs 0h
2.86567	5.48623	4.02479	96h vs 0h
3.85268	4.47658	3.67099	96h vs 0h
3.88788	4.98872	4.37158	96h vs 0h
-1.19818	-0.431625	0.24066	96h vs 0h
2.1284	5.17481	3.2164	96h vs 0h
1.63513	3.4482	3.23318	96h vs 0h
2.95352	4.9924	3.89357	96h vs 0h
2.02314	5.64757	2.94305	96h vs 0h
1.45525	3.02323	1.96347	96h vs 0h
3.08094	4.0299	3.96938	96h vs 0h
3.88371	5.76842	4.52621	96h vs 0h
4.205	8.99423	5.35141	96h vs 0h
3.45408	Inf	3.93124	96h vs 0h
2.98815	7.95476	4.47111	96h vs 0h
1.26774	-0.0299725	0.749076	96h vs 0h
1.33573	1.29477	1.34693	96h vs 0h
1.37268	2.05604	1.63928	96h vs 0h
0.449503	-0.469435	-0.165697	96h vs 0h
1.00296	0.121642	0.828734	96h vs 0h
0.59026	0.108808	0.161282	96h vs 0h
-0.380876	-0.548094	-0.368517	96h vs 0h
0.572776	0.0548981	0.533102	96h vs 0h
-0.113788	0.592526	0.54173	96h vs 0h
0.694331	0.121659	-0.248883	96h vs 0h
-1.54115	-2.78653	-2.13225	96h vs 0h
-2.2541	-1.81057	-0.435902	96h vs 0h
-2.78782	-5.10539	-3.63545	96h vs 0h
-2.01141	-3.44652	-2.34428	96h vs 0h
-0.370139	-1.29913	-0.37169	96h vs 0h
-1.12324	-1.69614	-0.881204	96h vs 0h
-0.687717	-1.11086	-0.407135	96h vs 0h
-1.53517	-2.64691	-1.44584	96h vs 0h
-2.89173	-4.65386	-2.89952	96h vs 0h
-0.63148	-0.625745	-0.279136	96h vs 0h
-2.36091	-5.21507	-2.89933	96h vs 0h
4.48712	6.77037	5.01902	96h vs 0h
2.48284	5.52495	2.76171	96h vs 0h
3.55599	5.22264	3.1927	96h vs 0h
2.3832	4.77435	3.03583	96h vs 0h
2.87504	6.37599	3.62203	96h vs 0h
2.40738	5.95786	3.7986	96h vs 0h
2.59968	4.65808	3.21363	96h vs 0h
-0.0445782	-0.0833636	0.091175	96h vs 0h
2.1767	6.05573	4.09567	96h vs 0h
1.13355	8.70698	2.92916	96h vs 0h
1.72675	4.92035	2.61024	96h vs 0h
1.03395	6.41301	1.74393	96h vs 0h
2.55388	4.89573	3.66104	96h vs 0h
1.30293	2.89763	2.77892	96h vs 0h
3.1222	5.56685	3.64342	96h vs 0h
2.52214	6.8123	3.87006	96h vs 0h
2.77305	7.58534	3.95448	96h vs 0h
3.12405	6.41014	3.47207	96h vs 0h
4.11025	7.93349	4.71385	96h vs 0h
2.83364	4.95319	3.30785	96h vs 0h
-0.0961525	-0.219184	-0.517108	96h vs 0h
2.30668	4.41888	2.47782	96h vs 0h
2.59573	5.24917	1.27143	96h vs 0h
3.23522	6.10709	3.70725	96h vs 0h
-0.78032	1.15541	0.0711244	96h vs 0h
3.551	7.00671	5.07948	96h vs 0h
1.76906	6.50998	4.08406	96h vs 0h
2.31827	2.75665	4.23924	96h vs 0h
2.44	3.76771	3.13961	96h vs 0h
3.80919	4.18856	3.22638	96h vs 0h
2.43522	4.59615	3.37843	96h vs 0h
2.78024	3.49801	2.55802	96h vs 0h
7.12071	5.56853	6.62026	96h vs 0h
Inf	6.61073	4.41014	96h vs 0h
Inf	4.44164	3.94836	96h vs 0h
-4.01061	-2.36838	-2.25848	96h vs 0h
1.79987	1.73953	1.65009	96h vs 0h
0.697077	3.47608	1.35422	96h vs 0h
1.3596	2.23288	1.67367	96h vs 0h
1.55865	5.68397	2.95113	96h vs 0h
2.97915	4.57149	3.04884	96h vs 0h
3.05837	7.29473	5.73218	96h vs 0h
3.02513	5.49837	4.29954	96h vs 0h
2.13444	1.68867	1.58427	96h vs 0h
2.73744	4.16777	2.02822	96h vs 0h
3.32074	3.04439	1.75092	96h vs 0h
1.45233	-0.368463	-0.0358481	96h vs 0h
-1.94458	-3.44273	-0.989085	96h vs 0h
-0.494416	-2.58094	-1.3668	96h vs 0h
-1.25619	-3.31829	-2.95724	96h vs 0h
3.02679	2.50864	1.69762	96h vs 0h
3.12191	7.70824	4.85065	96h vs 0h
2.35704	7.13362	3.83517	96h vs 0h
4.06545	9.07403	5.63721	96h vs 0h
3.16145	4.91186	2.87239	96h vs 0h
1.92715	3.47909	2.40594	96h vs 0h
1.4282	2.06	1.58582	96h vs 0h
0.514408	-0.34851	0.724953	96h vs 0h
3.04663	6.20301	4.22818	96h vs 0h
4.68312	Inf	3.80248	96h vs 0h
3.42147	6.95484	5.02305	96h vs 0h
1.28811	3.13007	2.48197	96h vs 0h
0.777045	1.85359	2.42421	96h vs 0h
2.66108	6.40642	4.11953	96h vs 0h
2.32225	6.32716	4.50902	96h vs 0h
0.158373	1.52452	0.435385	96h vs 0h
Inf	6.28276	5.32151	96h vs 0h
3.30068	3.47231	3.81451	96h vs 0h
1.35458	2.9114	2.71909	96h vs 0h
2.5411	4.33702	4.78742	96h vs 0h
0.546642	2.13457	1.1755	96h vs 0h
1.95773	3.27189	4.47581	96h vs 0h
2.47247	7.09451	4.76309	96h vs 0h
3.94748	6.1503	4.63416	96h vs 0h
-1.99216	-1.66207	-2.59619	96h vs 0h
-0.30728	-0.522423	-0.381444	96h vs 0h
1.58265	-0.173792	0.795963	96h vs 0h
2.14357	-0.581125	0.517247	96h vs 0h
0.189952	-1.89998	-1.81285	96h vs 0h
0.125153	-1.91209	-2.08316	96h vs 0h
-1.46888	-3.31052	-3.43887	96h vs 0h
-2.53435	-4.15918	-3.39171	96h vs 0h
-2.06104	-4.188	-2.77787	96h vs 0h
-2.56231	-3.60988	-2.23827	96h vs 0h
0.557407	-0.311329	0.330258	96h vs 0h
2.48295	3.23323	1.47227	96h vs 0h
2.19829	0.895863	0.0985561	96h vs 0h
2.48905	4.85494	2.96365	96h vs 0h
2.87524	3.09193	2.93487	96h vs 0h
3.4606	5.49347	4.27971	96h vs 0h
3.63646	6.60234	4.55789	96h vs 0h
2.89803	6.08879	4.24452	96h vs 0h
3.18176	7.46402	5.31116	96h vs 0h
3.16488	8.37061	4.74377	96h vs 0h
3.60565	4.75231	3.40037	96h vs 0h
3.49796	4.63861	3.32138	96h vs 0h
2.81563	4.68634	2.50482	96h vs 0h
3.40127	3.92476	2.80731	96h vs 0h
0.628735	Inf	4.09658	96h vs 0h
0.0798679	-1.38259	0.944021	96h vs 0h
-1.83076	-3.91511	-3.92371	96h vs 0h
-1.24376	-3.37178	-1.93903	96h vs 0h
-0.749611	-3.44605	-2.18504	96h vs 0h
-0.441039	-2.47059	-2.02249	96h vs 0h
0.928467	-0.979421	-0.712633	96h vs 0h
0.272877	-1.17623	0.786195	96h vs 0h
0.118289	-1.55608	0.0499677	96h vs 0h
-1.63024	-1.9597	-0.661648	96h vs 0h
-2.8037	-2.54398	-1.9967	96h vs 0h
-3.27158	-3.37086	-1.51174	96h vs 0h
-2.78283	-1.82875	-1.91332	96h vs 0h
-1.62493	-0.967223	-0.2828	96h vs 0h
-0.139797	-0.370338	0.363178	96h vs 0h
-0.68978	-0.00276245	0.39377	96h vs 0h
0.683351	1.83416	1.56949	96h vs 0h
2.94975	3.95491	3.35468	96h vs 0h
4.26961	6.1228	4.69317	96h vs 0h
3.17304	4.52945	2.51298	96h vs 0h
5.56212	Inf	4.24429	96h vs 0h
1.88635	3.60484	2.02312	96h vs 0h
3.9958	5.77016	1.50329	96h vs 0h
3.54553	6.59667	2.83802	96h vs 0h
2.63336	5.03946	4.77099	96h vs 0h
0.0407588	2.01237	0.272517	96h vs 0h
-0.330549	-0.0693699	-0.41606	96h vs 0h
-0.604051	-0.725275	-0.733684	96h vs 0h
-1.06952	-3.35096	-2.66526	96h vs 0h
-1.11328	-2.93224	-1.27842	96h vs 0h
-1.5259	-1.946	-0.94761	96h vs 0h
-2.28782	-3.78518	-2.43041	96h vs 0h
1.32625	-0.0990914	0.358045	96h vs 0h
1.40292	0.100478	0.641264	96h vs 0h
1.92167	6.36199	4.8671	96h vs 0h
-0.388553	-1.08743	-0.326806	96h vs 0h
1.53775	3.41211	2.66929	96h vs 0h
1.94567	1.92965	1.76111	96h vs 0h
2.11574	1.73353	1.45711	96h vs 0h
-0.71262	-0.377544	-0.629257	96h vs 0h
1.33525	2.11947	1.12283	96h vs 0h
Inf	8.50746	7.38302	96h vs 0h
3.81916	5.41284	4.31493	96h vs 0h
1.99965	3.92758	2.63615	96h vs 0h
2.97416	3.71332	2.5592	96h vs 0h
-0.336318	0.969804	0.772578	96h vs 0h
4.0662	5.30452	4.29344	96h vs 0h
4.05691	Inf	4.15892	96h vs 0h
4.66465	8.03488	5.63819	96h vs 0h
3.90513	6.47677	3.63607	96h vs 0h
4.28722	5.5096	3.22508	96h vs 0h
3.61353	5.35301	4.38668	96h vs 0h
1.8566	3.01346	3.67646	96h vs 0h
8.15913	7.92263	4.00697	96h vs 0h
2.98436	6.84981	3.51173	96h vs 0h
3.63823	6.00496	3.96718	96h vs 0h
3.85847	5.32317	4.6272	96h vs 0h
5.0396	7.23888	4.32025	96h vs 0h
2.46087	6.10133	3.4015	96h vs 0h
2.3738	5.15419	3.45192	96h vs 0h
3.37507	7.93437	3.97321	96h vs 0h
4.92198	7.27519	5.57984	96h vs 0h
4.89099	6.73455	5.3267	96h vs 0h
1.97079	3.31947	2.41519	96h vs 0h
2.73475	5.08199	3.14273	96h vs 0h
3.49363	3.90329	2.80232	96h vs 0h
1.37679	3.00732	3.37849	96h vs 0h
1.32806	5.25572	2.90207	96h vs 0h
1.63369	2.15871	2.9152	96h vs 0h
7.01869	7.69751	5.83777	96h vs 0h
1.87841	8.48185	2.36488	96h vs 0h
1.00316	-0.676819	0.441128	96h vs 0h
0.609066	-1.74695	0.45889	96h vs 0h
-1.50815	-3.43136	-1.24427	96h vs 0h
0.0612867	-1.30687	-1.35701	96h vs 0h
-2.04183	-4.15813	-3.1918	96h vs 0h
-1.78084	-3.32688	-3.49773	96h vs 0h
-2.93713	-3.32745	-3.56956	96h vs 0h
-0.883218	-2.66708	-0.83168	96h vs 0h
-2.19977	-4.05813	-3.41676	96h vs 0h
2.02101	4.80229	4.13776	96h vs 0h
0.906523	2.46276	1.55271	96h vs 0h
3.42681	5.98717	3.82911	96h vs 0h
4.27233	11.1153	5.23344	96h vs 0h
1.49735	0.0821684	0.843539	96h vs 0h
2.34859	3.09778	3.68935	96h vs 0h
3.91704	7.22449	5.20368	96h vs 0h
3.33694	4.65144	5.3736	96h vs 0h
3.46982	5.65948	5.11309	96h vs 0h
2.85857	6.34834	5.23284	96h vs 0h
3.08015	7.72699	5.79964	96h vs 0h
4.87059	5.5626	12.0656	96h vs 0h
4.06151	8.27201	5.93418	96h vs 0h
3.41025	3.53697	3.38594	96h vs 0h
2.64001	6.33342	4.58597	96h vs 0h
2.49179	6.68867	5.48279	96h vs 0h
4.00061	7.15571	6.17854	96h vs 0h
2.01672	3.32828	1.87615	96h vs 0h
2.83863	5.63232	4.39784	96h vs 0h
2.28611	1.1616	2.10832	96h vs 0h
2.25884	5.76268	3.04632	96h vs 0h
-1.27361	-1.20968	-1.52954	96h vs 0h
2.87123	2.93203	2.8908	96h vs 0h
-0.920793	0.409757	-0.714756	96h vs 0h
0.434025	1.54353	1.21793	96h vs 0h
1.74594	4.30731	2.36801	96h vs 0h
2.00211	4.76115	2.60561	96h vs 0h
-1.17847	-1.18105	-0.819358	96h vs 0h
-2.13122	-1.00641	-1.34094	96h vs 0h
1.45809	3.73091	3.14835	96h vs 0h
0.0327027	1.26273	1.06649	96h vs 0h
0.541368	5.29803	1.31608	96h vs 0h
0.257026	1.07372	0.548994	96h vs 0h
-0.15514	1.26365	0.324886	96h vs 0h
0.169488	1.09235	0.116242	96h vs 0h
1.65836	4.3803	2.0186	96h vs 0h
0.838089	3.09418	1.05813	96h vs 0h
2.28075	3.54503	2.45085	96h vs 0h
0.286564	1.49231	-0.36083	96h vs 0h
0.639463	1.58235	0.417132	96h vs 0h
0.134377	0.465319	0.525258	96h vs 0h
-0.455375	0.666647	-0.00710002	96h vs 0h
3.12143	11.3421	1.71435	96h vs 0h
4.45946	6.95015	4.75174	96h vs 0h
3.74198	5.74927	3.8533	96h vs 0h
2.98817	4.23712	2.66885	96h vs 0h
1.79111	2.21402	0.353089	96h vs 0h
3.50508	6.17213	3.33037	96h vs 0h
3.06287	7.17129	4.0591	96h vs 0h
2.98789	4.69471	3.85506	96h vs 0h
3.35599	5.06489	3.32034	96h vs 0h
0.91637	-0.696696	0.110963	96h vs 0h
1.64091	0.517046	0.627407	96h vs 0h
2.99597	1.25227	0.868822	96h vs 0h
-1.30858	-2.0346	-2.4293	96h vs 0h
3.0797	3.25066	2.67721	96h vs 0h
2.80082	3.7432	3.27133	96h vs 0h
0.770733	1.54049	0.913674	96h vs 0h
3.72268	5.95798	2.9947	96h vs 0h
1.04533	0.550669	0.675054	96h vs 0h
1.6661	3.73507	2.15341	96h vs 0h
4.10606	7.55384	4.60474	96h vs 0h
4.02815	7.42996	4.72623	96h vs 0h
3.12978	10.5315	6.43681	96h vs 0h
3.75182	6.58057	4.81207	96h vs 0h
3.11893	4.61029	3.92104	96h vs 0h
1.79702	3.91909	2.47749	96h vs 0h
2.13594	5.4022	3.8613	96h vs 0h
1.11409	6.31195	3.19009	96h vs 0h
1.44397	3.43824	3.21245	96h vs 0h
0.747177	1.52254	0.435958	96h vs 0h
-0.685218	-0.339348	-1.06756	96h vs 0h
2.32729	1.77179	1.76299	96h vs 0h
3.32113	3.11355	3.02086	96h vs 0h
2.90809	5.9864	2.52076	96h vs 0h
-0.891217	-2.07074	-1.5032	96h vs 0h
-0.111637	0.201021	-0.330306	96h vs 0h
-1.06835	-2.00824	-0.0644565	96h vs 0h
-1.03689	-1.64321	-0.462956	96h vs 0h
0.315669	-0.934403	0.389752	96h vs 0h
-0.42499	-1.31347	-0.0862387	96h vs 0h
0.0431449	-0.435515	0.666631	96h vs 0h
1.94493	3.09713	2.63541	96h vs 0h
-0.904786	-0.0207269	0.13424	96h vs 0h
0.309964	-0.388287	0.242232	96h vs 0h
-0.499811	-1.06782	-0.790366	96h vs 0h
0.443964	-0.131273	-0.0406622	96h vs 0h
-2.46467	-4.68805	-2.92571	96h vs 0h
-1.36192	-3.74052	-2.19417	96h vs 0h
-2.96509	-4.50871	-3.73316	96h vs 0h
-1.57202	-4.09818	-2.59017	96h vs 0h
-1.97218	-3.06404	-1.77516	96h vs 0h
-0.52872	-2.97293	-2.01644	96h vs 0h
1.20871	-0.325513	0.296554	96h vs 0h
-0.529221	-0.253677	-0.510159	96h vs 0h
0.524332	-1.49905	-0.965754	96h vs 0h
-0.251475	-1.02866	-0.711553	96h vs 0h
0.755717	1.13943	0.988494	96h vs 0h
2.46669	4.04949	2.94233	96h vs 0h
2.42043	5.57701	4.11458	96h vs 0h
2.00199	1.93403	1.4606	96h vs 0h
3.08829	4.65514	2.32069	96h vs 0h
0.777363	0.9131	1.13315	96h vs 0h
1.40362	4.69476	2.43821	96h vs 0h
1.42609	4.05782	3.56435	96h vs 0h
1.77771	4.95644	2.96914	96h vs 0h
0.349593	1.47529	1.61525	96h vs 0h
2.3602	4.21775	3.35702	96h vs 0h
2.20843	5.71057	2.99935	96h vs 0h
1.41829	3.36931	2.09763	96h vs 0h
2.06257	4.69855	3.40991	96h vs 0h
1.94552	Inf	2.44619	96h vs 0h
-1.40614	-2.59273	-1.08231	96h vs 0h
-1.5139	-2.3873	-0.766773	96h vs 0h
-1.03138	-3.187	-1.3397	96h vs 0h
-1.85091	-4.00487	-1.65664	96h vs 0h
-1.54381	-3.45818	-1.14719	96h vs 0h
-2.64283	-3.614	-2.42617	96h vs 0h
-1.40472	-2.31531	-1.37138	96h vs 0h
3.33817	2.85267	2.16686	96h vs 0h
1.76962	2.41783	2.03046	96h vs 0h
2.97813	7.58705	4.10267	96h vs 0h
2.79747	6.87762	5.07906	96h vs 0h
4.43747	8.22449	4.70368	96h vs 0h
3.1345	6.14105	2.12348	96h vs 0h
3.11317	1.78511	2.15585	96h vs 0h
1.1348	3.17141	3.46479	96h vs 0h
2.15597	-1.01599	0.357262	96h vs 0h
1.63594	1.87904	1.31662	96h vs 0h
-0.00284362	-2.25364	-1.40395	96h vs 0h
1.38039	0.722674	0.843679	96h vs 0h
0.232649	-1.70964	-1.03328	96h vs 0h
3.60907	4.93154	4.11417	96h vs 0h
2.55403	4.80844	3.40018	96h vs 0h
0.880681	1.57867	1.28322	96h vs 0h
1.06975	2.03275	1.9044	96h vs 0h
0.00182774	2.27956	1.50413	96h vs 0h
2.22656	2.16183	4.00871	96h vs 0h
1.45443	5.29872	2.03737	96h vs 0h
0.936645	3.36576	2.27334	96h vs 0h
2.08595	3.2755	2.65294	96h vs 0h
2.8136	4.02704	3.03431	96h vs 0h
1.4665	-0.838205	-0.532774	96h vs 0h
2.47397	5.99306	4.41658	96h vs 0h
1.55404	Inf	1.19536	96h vs 0h
2.69292	6.02572	4.45651	96h vs 0h
3.953	7.9465	4.45354	96h vs 0h
4.0846	4.11224	3.64895	96h vs 0h
3.82143	5.18151	3.6287	96h vs 0h
4.18158	6.71702	4.49184	96h vs 0h
Inf	2.43493	1.51601	96h vs 0h
2.26249	2.06943	1.40335	96h vs 0h
1.77834	3.67405	1.3418	96h vs 0h
1.58851	2.5024	2.06271	96h vs 0h
2.58945	5.47181	2.80845	96h vs 0h
3.70724	7.12042	3.91808	96h vs 0h
0.276984	-0.86215	-0.096654	96h vs 0h
-1.6617	-3.14408	-1.5903	96h vs 0h
-1.61705	-2.88705	-1.35179	96h vs 0h
-2.21313	-2.94269	-2.42537	96h vs 0h
0.143203	-0.465604	-1.03229	96h vs 0h
-0.89429	-2.33172	-1.05677	96h vs 0h
2.9827	-0.314691	0.30112	96h vs 0h
2.67764	-0.281625	1.08212	96h vs 0h
1.00911	-0.482078	-0.0407066	96h vs 0h
0.996786	-0.355472	0.372921	96h vs 0h
1.8354	4.2196	3.56318	96h vs 0h
1.5449	5.0775	4.58415	96h vs 0h
1.18821	5.71361	4.67798	96h vs 0h
2.69613	1.20235	2.41597	96h vs 0h
3.01375	3.11333	2.58773	96h vs 0h
0.715066	2.86197	1.3722	96h vs 0h
2.43102	3.84391	3.27669	96h vs 0h
3.26975	7.7856	4.66718	96h vs 0h
2.04185	5.37168	3.377	96h vs 0h
3.77726	3.57689	2.85501	96h vs 0h
2.33314	6.20125	3.00719	96h vs 0h
2.11783	5.84076	2.79824	96h vs 0h
1.14548	2.29606	0.808271	96h vs 0h
3.35736	4.66796	2.52394	96h vs 0h
1.79382	1.55169	1.09627	96h vs 0h
4.32802	2.15558	1.58922	96h vs 0h
1.64905	2.20228	0.921464	96h vs 0h
1.68986	3.92174	2.81205	96h vs 0h
1.958	4.1445	2.93984	96h vs 0h
-0.701095	-1.71516	-2.18328	96h vs 0h
1.05274	3.00843	1.04838	96h vs 0h
1.41933	3.16512	1.58952	96h vs 0h
0.808241	0.371643	1.3732	96h vs 0h
1.51699	0.88218	1.37152	96h vs 0h
0.833065	0.988426	1.11151	96h vs 0h
-0.534916	0.0661619	-0.45973	96h vs 0h
3.43967	6.468	3.75405	96h vs 0h
1.78479	1.86104	1.53468	96h vs 0h
2.03303	4.48863	1.77175	96h vs 0h
-0.262278	5.08912	3.10962	96h vs 0h
1.6952	1.4381	1.17672	96h vs 0h
0.572391	1.08051	1.06286	96h vs 0h
1.4002	1.61651	1.48195	96h vs 0h
0.894101	2.63603	2.55475	96h vs 0h
2.71138	3.85344	2.14071	96h vs 0h
3.84047	6.81706	8.21597	96h vs 0h
1.89663	5.42369	3.74137	96h vs 0h
2.35871	7.45912	5.05806	96h vs 0h
-1.25371	-2.16275	-1.34103	96h vs 0h
-2.44653	-3.61157	-2.74943	96h vs 0h
-1.52208	-4.13681	-2.86892	96h vs 0h
1.74223	-1.02955	0.0210447	96h vs 0h
-0.96815	-1.44157	-0.935291	96h vs 0h
-0.218373	0.288577	0.165741	96h vs 0h
0.664739	1.97238	1.30304	96h vs 0h
0.546523	1.72465	2.20221	96h vs 0h
0.787819	0.775004	0.711339	96h vs 0h
1.32801	5.33068	2.91986	96h vs 0h
3.10362	6.40892	6.18306	96h vs 0h
-0.614478	-0.186428	-0.0202984	96h vs 0h
1.75714	2.71483	3.23605	96h vs 0h
1.15999	1.35396	1.8091	96h vs 0h
2.63321	5.20834	4.29171	96h vs 0h
2.14626	4.83561	3.876	96h vs 0h
2.44201	7.38495	4.49421	96h vs 0h
3.14041	5.40724	4.0144	96h vs 0h
0.750304	-0.505062	0.0955228	96h vs 0h
1.6363	4.1517	3.01068	96h vs 0h
1.01024	0.815205	1.03051	96h vs 0h
2.36999	2.50991	2.07019	96h vs 0h
2.77237	4.58856	2.9894	96h vs 0h
1.79491	3.47665	1.61116	96h vs 0h
2.69664	2.88616	2.56631	96h vs 0h
-3.6436	-2.29156	-1.94895	96h vs 0h
2.46982	7.61772	3.51249	96h vs 0h
3.12784	6.74064	4.82034	96h vs 0h
3.27311	6.00561	4.3708	96h vs 0h
4.45371	8.56875	7.93192	96h vs 0h
2.6924	Inf	5.25327	96h vs 0h
3.88197	Inf	5.19664	96h vs 0h
1.71358	2.80693	1.76803	96h vs 0h
1.25505	2.10041	1.62908	96h vs 0h
3.39467	6.53485	4.48136	96h vs 0h
4.5218	7.05682	5.57947	96h vs 0h
0.716098	3.45294	1.76281	96h vs 0h
0.286136	2.7474	0.885916	96h vs 0h
1.02649	5.53402	2.94986	96h vs 0h
-3.20828	-3.64071	-2.63611	96h vs 0h
1.76183	1.76932	1.80005	96h vs 0h
2.46303	5.07157	1.66072	96h vs 0h
-3.96509	-2.61715	-1.9517	96h vs 0h
-1.5349	-4.30555	-1.85653	96h vs 0h
-2.00856	-3.51229	-2.37191	96h vs 0h
-1.31827	-1.02622	-0.485666	96h vs 0h
-3.85865	-4.15426	-3.80873	96h vs 0h
-0.307048	-5.93458	-4.06483	96h vs 0h
-1.00949	-5.34165	-2.87092	96h vs 0h
-2.48752	-2.65937	-1.24045	96h vs 0h
-4.06156	-3.61666	-3.26861	96h vs 0h
-2.81548	-2.84102	-2.26572	96h vs 0h
-1.74241	-3.09389	-1.41466	96h vs 0h
0.580239	-5.80736	-1.70557	96h vs 0h
1.03094	2.48856	1.34854	24h vs 0h
0.17548	2.96303	1.14211	24h vs 0h
0.909074	3.26197	2.44017	24h vs 0h
0.236906	1.98376	1.10075	24h vs 0h
0.0049702	0.365436	0.265537	24h vs 0h
0.106889	0.752119	0.202459	24h vs 0h
1.28005	5.62992	2.83034	24h vs 0h
0.419825	2.86176	2.79818	24h vs 0h
0.800722	2.8963	1.58752	24h vs 0h
1.85011	3.11399	1.39899	24h vs 0h
2.00151	1.46534	0.999896	24h vs 0h
0.914713	-1.10138	-0.92431	24h vs 0h
-0.741694	-0.646426	-0.127541	24h vs 0h
-1.6729	-1.77727	-1.04652	24h vs 0h
-0.187863	-0.336158	0.760103	24h vs 0h
1.52196	2.57693	1.45229	24h vs 0h
-0.133467	3.50766	-0.143384	24h vs 0h
3.51543	0.712214	1.26209	24h vs 0h
0.861779	-0.611976	-0.483546	24h vs 0h
1.07327	-1.12615	-1.18425	24h vs 0h
1.48704	0.7857	0.026488	24h vs 0h
0.853399	2.65064	1.37965	24h vs 0h
1.82268	3.7464	2.05954	24h vs 0h
1.21739	3.53081	1.6653	24h vs 0h
1.32089	5.7431	1.52819	24h vs 0h
0.038375	3.70368	0.894975	24h vs 0h
2.28135	1.30033	0.39192	24h vs 0h
0.530782	0.696305	0.610596	24h vs 0h
3.08474	5.24906	3.01261	24h vs 0h
1.19294	2.68787	1.01966	24h vs 0h
2.63671	3.95139	3.28981	24h vs 0h
3.60691	4.81713	3.32477	24h vs 0h
2.17588	4.11095	2.8419	24h vs 0h
0.866709	2.69698	0.364496	24h vs 0h
0.834922	1.10962	0.391835	24h vs 0h
2.2894	1.98586	1.55918	24h vs 0h
1.86232	1.47893	0.457932	24h vs 0h
-0.263602	-0.704232	-0.00969416	24h vs 0h
-1.80162	-2.55494	-0.739334	24h vs 0h
-0.73264	-0.828538	-0.554291	24h vs 0h
-0.717646	-0.149122	-0.280648	24h vs 0h
-0.505334	-0.0781854	-0.210782	24h vs 0h
-0.0929261	0.672075	-0.590966	24h vs 0h
-0.811475	0.793832	0.0311299	24h vs 0h
-0.516658	-0.561836	-0.345492	24h vs 0h
0.00663114	0.244832	0.865641	24h vs 0h
-1.20774	-2.33073	-0.737693	24h vs 0h
0.250427	1.74475	1.57436	24h vs 0h
1.50279	4.21116	1.68496	24h vs 0h
2.67244	4.65714	2.78297	24h vs 0h
-2.62703	-3.62421	-2.76465	24h vs 0h
-1.09105	-1.93486	-1.6809	24h vs 0h
-0.873185	-1.59133	-0.973678	24h vs 0h
0.0319256	0.265992	-0.0227637	24h vs 0h
0.91919	-0.509828	0.608776	24h vs 0h
-2.57663	-3.23422	-1.59452	24h vs 0h
-0.225086	-1.04255	1.94661	24h vs 0h
0.890596	5.56005	3.40913	24h vs 0h
2.13835	5.52923	3.18431	24h vs 0h
1.20901	2.64707	1.23509	24h vs 0h
2.17251	6.21217	2.49424	24h vs 0h
2.42002	6.45246	3.53183	24h vs 0h
2.87891	5.6668	3.5061	24h vs 0h
1.54012	5.29917	2.71535	24h vs 0h
2.85863	3.40977	2.90138	24h vs 0h
3.15874	5.31065	3.69933	24h vs 0h
-0.203957	0.0256575	0.093424	24h vs 0h
0.817167	3.71812	1.47795	24h vs 0h
1.52775	2.56435	2.03923	24h vs 0h
1.93056	3.80488	2.1158	24h vs 0h
0.194081	3.51861	1.03802	24h vs 0h
0.815724	2.33181	1.0369	24h vs 0h
0.356062	0.212062	1.84332	24h vs 0h
1.89591	3.34053	1.71186	24h vs 0h
2.66722	7.57623	3.26945	24h vs 0h
3.45095	Inf	4.12233	24h vs 0h
1.61009	6.62262	3.31122	24h vs 0h
1.3029	0.655232	0.346382	24h vs 0h
0.976187	0.954061	0.890466	24h vs 0h
1.80451	3.30824	1.77481	24h vs 0h
0.282615	-0.0758248	-0.171686	24h vs 0h
0.504174	0.0836902	0.306534	24h vs 0h
-0.116176	0.491953	0.283298	24h vs 0h
-0.80411	-0.0320294	-0.380617	24h vs 0h
0.475261	0.607772	0.471495	24h vs 0h
-0.075866	0.157661	0.350284	24h vs 0h
0.524985	-0.035759	-0.185767	24h vs 0h
-1.10009	-0.468707	-0.934591	24h vs 0h
-0.921975	-0.0262665	0.26568	24h vs 0h
-2.90965	-5.00712	-3.53418	24h vs 0h
-1.84684	-1.61629	-1.22492	24h vs 0h
-0.34616	-1.15498	-0.871914	24h vs 0h
-0.866854	-0.874108	-1.19522	24h vs 0h
-0.578517	-0.842422	-0.779553	24h vs 0h
-0.866377	-1.43072	-0.942987	24h vs 0h
-1.61632	-2.99326	-2.18796	24h vs 0h
-0.172393	-0.270299	-0.560396	24h vs 0h
-2.62953	-3.13073	-2.33962	24h vs 0h
3.19749	5.49516	3.26195	24h vs 0h
1.99985	5.38533	2.59896	24h vs 0h
2.93821	5.08244	2.78297	24h vs 0h
1.1022	3.91297	1.82086	24h vs 0h
1.3101	4.98136	1.6371	24h vs 0h
1.20148	3.17644	2.37799	24h vs 0h
1.71395	3.17435	2.17315	24h vs 0h
0.0825122	0.481723	0.0274378	24h vs 0h
2.12166	6.31943	3.90514	24h vs 0h
0.501143	7.60272	1.70501	24h vs 0h
1.99619	5.61841	2.77713	24h vs 0h
1.15712	7.26307	2.34465	24h vs 0h
2.39672	5.40908	3.04109	24h vs 0h
0.535295	1.64121	0.926206	24h vs 0h
1.30498	3.79769	1.517	24h vs 0h
0.806028	4.47199	1.71656	24h vs 0h
1.34142	5.28411	2.22418	24h vs 0h
0.840594	4.38098	1.444	24h vs 0h
2.65563	6.64687	2.8329	24h vs 0h
2.68553	4.55877	3.12537	24h vs 0h
0.217598	0.229192	-0.25065	24h vs 0h
0.481246	1.79802	0.172291	24h vs 0h
1.33306	2.98801	0.952993	24h vs 0h
2.19684	4.90582	2.4843	24h vs 0h
-0.408865	0.684092	0.0440855	24h vs 0h
1.43448	3.54231	2.41387	24h vs 0h
0.935249	4.24807	1.39583	24h vs 0h
1.72284	2.3998	2.66335	24h vs 0h
2.56583	3.73361	2.08874	24h vs 0h
3.13557	3.77212	2.10952	24h vs 0h
2.08122	4.40499	2.09999	24h vs 0h
3.49019	3.26924	2.16959	24h vs 0h
4.52729	3.55161	4.44171	24h vs 0h
Inf	2.51337	1.51188	24h vs 0h
Inf	0.932715	0.959262	24h vs 0h
-1.09218	0.188912	-0.781339	24h vs 0h
1.28176	1.97705	1.5131	24h vs 0h
0.341159	4.32486	1.59794	24h vs 0h
1.06664	3.12715	1.88633	24h vs 0h
0.650935	4.52356	1.77029	24h vs 0h
2.17518	4.95034	2.39262	24h vs 0h
1.60673	6.41859	4.36009	24h vs 0h
2.05472	3.46405	2.8805	24h vs 0h
1.32358	1.5563	0.921674	24h vs 0h
2.02611	2.9978	0.748652	24h vs 0h
2.36195	1.04899	1.13141	24h vs 0h
1.04027	0.666139	0.399451	24h vs 0h
-1.15048	-2.36189	-1.3583	24h vs 0h
-0.167822	-1.42529	-1.04198	24h vs 0h
-1.88466	-1.73972	-1.92758	24h vs 0h
2.42405	1.55027	0.790274	24h vs 0h
0.806683	4.74425	2.6409	24h vs 0h
-1.19491	5.07068	1.76594	24h vs 0h
2.06063	7.1999	3.42662	24h vs 0h
2.20795	3.57629	1.53633	24h vs 0h
1.12809	1.01843	0.509012	24h vs 0h
0.00693449	0.905452	0.176487	24h vs 0h
1.46255	1.57702	1.1456	24h vs 0h
2.02573	4.61765	2.99811	24h vs 0h
3.5846	Inf	2.88763	24h vs 0h
1.70705	5.30191	2.09255	24h vs 0h
1.18156	3.46465	1.49378	24h vs 0h
1.01394	2.40223	1.61634	24h vs 0h
1.23873	4.92664	3.14627	24h vs 0h
0.608764	3.94711	2.57346	24h vs 0h
-0.473604	0.121388	0.0289842	24h vs 0h
Inf	6.40659	4.72793	24h vs 0h
2.44637	2.13194	2.79006	24h vs 0h
0.348137	2.95991	2.33397	24h vs 0h
0.667283	3.63959	3.45718	24h vs 0h
0.0196289	2.14533	0.792767	24h vs 0h
1.45063	3.35888	3.13869	24h vs 0h
0.687298	6.18727	3.7312	24h vs 0h
1.81915	4.1121	2.931	24h vs 0h
-1.08905	-1.28152	-0.672498	24h vs 0h
0.062292	0.838409	0.370609	24h vs 0h
1.53741	0.523178	0.974185	24h vs 0h
1.93257	0.595006	0.974859	24h vs 0h
0.58718	-0.156448	-0.499448	24h vs 0h
0.469081	-0.0101813	-0.858828	24h vs 0h
-0.320561	-1.56499	-1.53002	24h vs 0h
-1.66344	-2.2967	-2.41793	24h vs 0h
-1.92921	-2.92305	-1.6528	24h vs 0h
-0.871336	-1.26071	-0.906904	24h vs 0h
1.76082	0.830077	0.145686	24h vs 0h
1.42255	1.66735	0.524425	24h vs 0h
1.59518	1.59066	0.344787	24h vs 0h
1.38044	3.49552	1.70618	24h vs 0h
1.71432	1.53938	1.58142	24h vs 0h
1.41702	3.06176	1.7998	24h vs 0h
1.05113	4.01857	1.89149	24h vs 0h
1.02625	4.41886	2.91138	24h vs 0h
1.83801	6.66761	4.16292	24h vs 0h
1.49214	5.73518	2.57936	24h vs 0h
2.27263	4.72233	2.90913	24h vs 0h
2.73943	4.74508	2.79715	24h vs 0h
1.76818	4.8861	2.05793	24h vs 0h
2.22148	3.89618	2.2337	24h vs 0h
0.296004	Inf	2.05424	24h vs 0h
-0.246406	-0.979079	-0.568388	24h vs 0h
-0.398491	-2.85592	-2.88156	24h vs 0h
-1.03327	-2.56641	-1.33214	24h vs 0h
-1.68325	-2.02121	-1.45959	24h vs 0h
-0.118019	-0.962906	-0.920364	24h vs 0h
2.34945	1.02892	0.451291	24h vs 0h
0.232032	-0.672108	0.501288	24h vs 0h
0.0229586	-1.0024	-0.352997	24h vs 0h
-0.889734	-0.462146	-0.4379	24h vs 0h
-1.75689	-2.13402	-1.32128	24h vs 0h
-1.76497	-0.892011	-1.2507	24h vs 0h
-1.68194	-0.836876	-0.57543	24h vs 0h
-0.822284	-0.791035	0.415402	24h vs 0h
-0.153175	-0.81687	0.0446917	24h vs 0h
-0.245973	-0.428934	0.0659252	24h vs 0h
-0.318341	1.30151	0.763205	24h vs 0h
1.10318	2.04272	1.99213	24h vs 0h
2.9089	4.46864	3.41998	24h vs 0h
1.66984	3.2047	1.80604	24h vs 0h
3.48958	Inf	1.75905	24h vs 0h
0.916997	3.52708	1.99282	24h vs 0h
2.93151	5.28024	1.02888	24h vs 0h
3.33393	6.86312	2.66207	24h vs 0h
1.83993	4.91074	3.99701	24h vs 0h
0.0572187	2.57935	0.569594	24h vs 0h
-0.112708	0.0203794	-0.419591	24h vs 0h
-0.371025	-0.600524	-0.919558	24h vs 0h
-0.566768	-1.11452	-1.17023	24h vs 0h
-1.84211	-2.89411	-1.00619	24h vs 0h
-1.2381	-2.18933	-1.1308	24h vs 0h
-1.7386	-1.50256	-0.798004	24h vs 0h
0.315424	-0.558999	0.109563	24h vs 0h
0.252005	-0.716318	-0.0897808	24h vs 0h
1.08229	5.4127	3.1847	24h vs 0h
-0.395154	-0.31295	-0.363172	24h vs 0h
1.43811	3.82419	2.54245	24h vs 0h
1.14314	0.6028	0.730965	24h vs 0h
1.08327	0.429697	0.456242	24h vs 0h
-0.859025	-1.1586	-1.19615	24h vs 0h
0.912765	1.61143	1.15751	24h vs 0h
Inf	5.89533	4.62351	24h vs 0h
2.31775	4.45709	2.79928	24h vs 0h
0.398083	1.88029	0.617487	24h vs 0h
0.0519145	1.34309	0.407578	24h vs 0h
-0.987579	-0.221819	-0.0653755	24h vs 0h
1.23286	1.14712	1.05981	24h vs 0h
2.01396	Inf	1.74652	24h vs 0h
2.27733	6.62798	3.9341	24h vs 0h
2.17619	5.12064	2.80968	24h vs 0h
1.12221	3.4557	1.58685	24h vs 0h
1.26858	3.48065	2.51653	24h vs 0h
1.12052	1.75921	2.59192	24h vs 0h
6.75928	6.71563	2.67334	24h vs 0h
-0.928976	1.8237	0.596291	24h vs 0h
2.15297	4.04121	2.39587	24h vs 0h
3.05795	3.56028	2.65059	24h vs 0h
2.13897	3.70354	1.70986	24h vs 0h
0.765588	3.19267	1.37205	24h vs 0h
-0.38684	2.45992	0.978352	24h vs 0h
0.883702	5.10018	1.71336	24h vs 0h
2.66307	4.28901	2.74233	24h vs 0h
2.12981	3.53808	1.97041	24h vs 0h
0.70128	2.15146	0.893226	24h vs 0h
2.10998	4.24537	1.55919	24h vs 0h
2.22322	3.13687	1.36404	24h vs 0h
1.44062	1.595	1.65018	24h vs 0h
0.0990028	2.89165	1.25592	24h vs 0h
1.93109	2.78191	2.59547	24h vs 0h
7.445	8.17305	5.59273	24h vs 0h
0.308997	6.97181	0.718848	24h vs 0h
0.604177	0.589119	0.94124	24h vs 0h
0.178438	-0.907588	0.0876626	24h vs 0h
-1.31855	-1.95266	-0.695222	24h vs 0h
-0.170321	-0.755075	-0.898834	24h vs 0h
-1.39273	-2.27251	-2.19732	24h vs 0h
0.330043	-1.0957	-0.933406	24h vs 0h
-3.00398	-2.62276	-3.012	24h vs 0h
-0.991863	-1.43	-0.925288	24h vs 0h
-1.67911	-2.84703	-0.746002	24h vs 0h
0.00093273	1.19041	1.96396	24h vs 0h
0.14262	1.18754	0.845416	24h vs 0h
2.89657	6.24089	3.78179	24h vs 0h
2.71929	9.91842	3.3792	24h vs 0h
1.18637	1.5676	1.09085	24h vs 0h
0.70111	1.13524	1.14178	24h vs 0h
1.67432	5.16352	2.99671	24h vs 0h
1.87525	3.601	4.64887	24h vs 0h
3.003	6.0278	3.15894	24h vs 0h
-0.089555	-0.107451	1.17867	24h vs 0h
-0.369931	1.9408	0.686377	24h vs 0h
2.8152	2.89763	10.3235	24h vs 0h
1.45513	5.42003	3.35227	24h vs 0h
1.73996	0.357176	1.56942	24h vs 0h
2.02985	4.1712	3.54738	24h vs 0h
1.65034	5.80445	4.31221	24h vs 0h
1.50718	5.01469	3.99786	24h vs 0h
1.08462	3.05523	0.74193	24h vs 0h
1.91674	4.3167	2.16671	24h vs 0h
-0.521604	0.0766687	0.225849	24h vs 0h
1.47003	5.35623	2.54154	24h vs 0h
0.431957	1.50902	0.14143	24h vs 0h
2.94963	3.42664	2.88419	24h vs 0h
-0.445158	1.56219	-0.271167	24h vs 0h
0.771278	1.57963	1.06212	24h vs 0h
1.32765	3.03455	1.39524	24h vs 0h
1.09626	3.40392	1.46485	24h vs 0h
-0.885871	-0.669947	-0.477038	24h vs 0h
-0.550033	0.533169	-0.32271	24h vs 0h
1.08882	2.72413	1.59539	24h vs 0h
0.284992	0.721896	0.26982	24h vs 0h
2.1922	6.58202	1.96575	24h vs 0h
0.466419	0.993531	0.587192	24h vs 0h
0.029141	0.851567	0.144158	24h vs 0h
0.173186	0.97034	-0.0756646	24h vs 0h
1.1455	3.1294	0.995895	24h vs 0h
0.804293	2.30856	0.962941	24h vs 0h
1.28037	2.14178	1.32487	24h vs 0h
0.520371	0.760058	-0.0921573	24h vs 0h
0.279631	1.19229	0.435533	24h vs 0h
-0.301304	0.279933	0.33006	24h vs 0h
-0.150766	-0.230693	-0.734543	24h vs 0h
1.65487	8.62238	0.267513	24h vs 0h
2.46251	4.15273	2.70031	24h vs 0h
1.75495	2.61879	1.5373	24h vs 0h
0.0995301	1.40212	0.671257	24h vs 0h
0.180812	0.391179	-0.505673	24h vs 0h
1.63565	4.27531	1.81499	24h vs 0h
-0.474931	2.40683	1.01143	24h vs 0h
0.939259	-1.30255	-0.407338	24h vs 0h
-0.121769	0.526388	0.25386	24h vs 0h
1.52385	0.38466	0.12662	24h vs 0h
1.28248	0.603585	-0.108985	24h vs 0h
2.1744	0.714325	0.0438244	24h vs 0h
-1.14974	-0.761468	-1.85955	24h vs 0h
1.89037	1.67003	1.49225	24h vs 0h
2.49187	3.53972	2.77621	24h vs 0h
0.676823	0.88192	0.289941	24h vs 0h
2.20488	3.90635	1.51149	24h vs 0h
0.365324	-0.1607	-0.270683	24h vs 0h
0.875402	3.5698	2.27125	24h vs 0h
2.09463	5.55072	2.63912	24h vs 0h
2.04356	5.30342	2.27775	24h vs 0h
0.939406	8.55432	3.67826	24h vs 0h
1.89607	5.05635	2.40282	24h vs 0h
2.57591	4.8651	3.27761	24h vs 0h
1.83758	4.59629	2.71746	24h vs 0h
2.14322	6.29201	4.03721	24h vs 0h
1.01263	7.05268	3.1562	24h vs 0h
1.00492	2.38207	2.14535	24h vs 0h
0.138536	0.947979	0.270149	24h vs 0h
0.527044	1.57458	0.208057	24h vs 0h
1.89049	3.43822	2.42551	24h vs 0h
0.790852	1.9179	0.911126	24h vs 0h
1.64332	4.30747	1.27847	24h vs 0h
-0.569983	-0.761092	-0.642358	24h vs 0h
-0.40891	0.163942	-0.660472	24h vs 0h
-0.647353	-1.04509	-0.725878	24h vs 0h
-0.459683	-0.321499	-0.580294	24h vs 0h
0.582711	0.24383	0.464175	24h vs 0h
-0.308081	-0.64336	-0.588612	24h vs 0h
-0.217484	-0.230624	-0.128763	24h vs 0h
1.27036	2.50001	1.16308	24h vs 0h
-0.128161	0.764668	0.318812	24h vs 0h
0.364122	0.735412	0.412587	24h vs 0h
0.0342224	1.06143	-0.315455	24h vs 0h
0.0140723	1.27857	0.203895	24h vs 0h
-2.00636	-2.62297	-1.74442	24h vs 0h
-1.27037	-1.86315	-0.681328	24h vs 0h
-2.05296	-2.25637	-1.5833	24h vs 0h
-1.88509	-2.81284	-1.63169	24h vs 0h
-1.69704	-2.46776	-1.48641	24h vs 0h
-0.432872	-1.4163	-1.13357	24h vs 0h
-0.0382256	0.370876	0.177155	24h vs 0h
-0.76137	-0.641475	-1.05925	24h vs 0h
0.0129079	-0.341469	-0.680077	24h vs 0h
-0.832296	-0.685314	-0.317083	24h vs 0h
0.834205	1.48977	0.845238	24h vs 0h
2.31595	4.03796	2.51724	24h vs 0h
0.967555	5.22212	3.3096	24h vs 0h
0.963114	1.0194	0.443591	24h vs 0h
2.77601	4.75448	1.93056	24h vs 0h
0.962683	1.31274	0.928557	24h vs 0h
-0.0122127	2.50196	0.769946	24h vs 0h
0.525922	2.89923	2.30084	24h vs 0h
1.09035	3.69799	1.50989	24h vs 0h
0.0631382	0.941168	0.567857	24h vs 0h
2.47005	4.33235	3.03402	24h vs 0h
1.24454	4.55861	1.92038	24h vs 0h
1.03603	2.73282	1.00624	24h vs 0h
1.04566	3.95451	2.42339	24h vs 0h
2.38084	Inf	2.94102	24h vs 0h
-1.49403	-1.49818	-0.755891	24h vs 0h
-0.813144	-0.299922	0.355437	24h vs 0h
-0.976146	-1.31024	-0.336762	24h vs 0h
-1.52285	-2.38517	-0.646329	24h vs 0h
-1.19942	-2.38931	-0.772497	24h vs 0h
-2.02518	-2.35155	-1.53509	24h vs 0h
-1.34871	-1.43867	-0.83171	24h vs 0h
1.98424	1.90812	1.13585	24h vs 0h
1.30387	1.81726	1.5832	24h vs 0h
1.52532	5.40864	1.98671	24h vs 0h
0.943054	3.80147	2.18583	24h vs 0h
3.46115	7.53631	3.78137	24h vs 0h
2.3111	5.56373	2.02341	24h vs 0h
2.27614	0.80193	1.19917	24h vs 0h
-0.315799	1.59279	1.87638	24h vs 0h
2.25066	0.202527	0.561169	24h vs 0h
0.934017	2.5679	1.91142	24h vs 0h
0.682288	-1.23873	-0.589892	24h vs 0h
1.22352	0.527392	0.562172	24h vs 0h
-0.0983178	-0.859026	-0.373144	24h vs 0h
1.35038	2.79163	1.43128	24h vs 0h
0.191314	2.67368	1.57281	24h vs 0h
0.403267	1.75999	0.901954	24h vs 0h
0.880972	1.83718	0.929444	24h vs 0h
-0.134384	1.41165	1.01325	24h vs 0h
1.13343	2.43132	2.34738	24h vs 0h
0.775445	5.17206	1.00932	24h vs 0h
0.230432	3.17928	1.27993	24h vs 0h
0.43612	2.3318	1.38061	24h vs 0h
1.25108	3.8578	2.16449	24h vs 0h
1.61566	-0.750781	-0.807493	24h vs 0h
1.75904	5.20735	3.15837	24h vs 0h
0.890774	Inf	1.35609	24h vs 0h
0.734674	1.98376	1.36964	24h vs 0h
1.94179	5.49438	1.79426	24h vs 0h
2.29711	2.80422	1.65768	24h vs 0h
2.49128	3.82608	2.0565	24h vs 0h
0.79952	1.37869	0.0658538	24h vs 0h
Inf	1.36017	1.28953	24h vs 0h
3.01735	2.6347	1.51163	24h vs 0h
0.976026	2.36362	0.581571	24h vs 0h
0.620164	-0.778601	0.842352	24h vs 0h
1.34558	4.07141	1.94472	24h vs 0h
0.837549	2.36012	-0.0304727	24h vs 0h
0.467442	-0.111146	0.304727	24h vs 0h
-1.94358	-2.72962	-1.45245	24h vs 0h
-1.72802	-2.59694	-1.47827	24h vs 0h
-1.35584	-1.7652	-1.36023	24h vs 0h
-0.0638537	-0.660001	-0.735094	24h vs 0h
-0.62887	-1.8776	-0.728416	24h vs 0h
2.50234	0.868713	0.397176	24h vs 0h
1.97452	0.235309	-0.617737	24h vs 0h
0.733095	-0.246152	-0.572143	24h vs 0h
1.91316	0.0064919	-0.093453	24h vs 0h
1.00084	4.18923	1.87019	24h vs 0h
0.475588	2.08376	2.49395	24h vs 0h
0.470451	5.26936	3.936	24h vs 0h
1.89163	2.53014	2.37633	24h vs 0h
1.26945	1.79822	1.11891	24h vs 0h
0.631755	3.41311	0.896452	24h vs 0h
1.73367	3.82719	3.13982	24h vs 0h
1.99981	8.22834	3.97998	24h vs 0h
-0.915027	4.41223	2.93309	24h vs 0h
1.94494	3.76551	2.33972	24h vs 0h
1.00912	5.03092	1.47239	24h vs 0h
0.921064	5.0013	2.18018	24h vs 0h
0.585731	3.19008	0.855319	24h vs 0h
1.92819	4.41266	1.93396	24h vs 0h
0.0394673	0.936421	0.390509	24h vs 0h
2.07358	1.76332	1.42777	24h vs 0h
1.52279	3.58287	2.12496	24h vs 0h
0.858426	4.63768	2.6978	24h vs 0h
1.48078	4.69564	2.92528	24h vs 0h
-0.60357	-0.57367	-1.07363	24h vs 0h
0.213583	2.476	0.750515	24h vs 0h
0.831338	2.05539	0.886794	24h vs 0h
0.382717	1.38981	1.17006	24h vs 0h
1.09448	2.36997	2.01638	24h vs 0h
0.120686	2.40195	1.25031	24h vs 0h
-0.56482	1.98202	0.161018	24h vs 0h
1.67812	6.58166	2.75695	24h vs 0h
1.44221	3.23755	2.2574	24h vs 0h
0.631782	3.07243	1.1902	24h vs 0h
-0.225659	5.54166	3.29051	24h vs 0h
1.31226	1.38193	0.613712	24h vs 0h
-0.787412	1.2578	0.754009	24h vs 0h
-0.301599	1.557	0.689682	24h vs 0h
1.49525	3.16424	2.47316	24h vs 0h
1.55572	1.57325	0.993603	24h vs 0h
1.52132	4.615	6.2186	24h vs 0h
1.37237	5.19703	3.2705	24h vs 0h
1.6422	6.77548	4.03169	24h vs 0h
0.634611	-0.346203	0.233508	24h vs 0h
-0.964548	-1.39731	-1.03198	24h vs 0h
-0.876408	-2.38894	-1.56343	24h vs 0h
1.0745	-0.406945	0.209774	24h vs 0h
1.09176	1.79197	0.760342	24h vs 0h
-0.19513	0.423214	0.589198	24h vs 0h
-0.0299896	1.81282	1.42923	24h vs 0h
0.0501472	1.187	1.29662	24h vs 0h
0.177555	0.0722179	0.638026	24h vs 0h
0.759446	5.02832	2.24262	24h vs 0h
1.42098	4.79612	5.03131	24h vs 0h
-0.02591	0.735243	0.567781	24h vs 0h
1.40422	2.15838	1.99362	24h vs 0h
1.31018	2.48612	2.51022	24h vs 0h
1.72754	5.21869	3.80763	24h vs 0h
1.33009	5.0611	3.15515	24h vs 0h
1.89693	6.73247	3.79927	24h vs 0h
2.48837	5.61239	3.48198	24h vs 0h
1.4301	0.225811	0.249958	24h vs 0h
1.46068	4.50075	2.36481	24h vs 0h
1.33874	1.56209	1.00247	24h vs 0h
1.96298	3.44683	2.02308	24h vs 0h
2.27528	4.6165	2.83086	24h vs 0h
0.399095	3.90665	0.783493	24h vs 0h
1.92307	3.41354	1.97655	24h vs 0h
-1.51774	-0.663386	-0.778838	24h vs 0h
0.864712	4.91308	1.51574	24h vs 0h
1.33427	4.071	2.78437	24h vs 0h
1.03892	1.85324	1.86306	24h vs 0h
1.80436	5.92162	4.77306	24h vs 0h
0.787828	Inf	1.40695	24h vs 0h
2.0168	Inf	3.13657	24h vs 0h
0.193666	1.07303	1.00413	24h vs 0h
0.213938	0.88752	0.780528	24h vs 0h
2.21104	6.3016	3.59591	24h vs 0h
3.55789	6.77439	4.71329	24h vs 0h
0.173256	1.32848	0.966439	24h vs 0h
0.177809	0.548794	-0.0330295	24h vs 0h
2.05925	6.58493	3.13553	24h vs 0h
-0.294771	-1.13845	-0.642151	24h vs 0h
0.611747	2.20858	1.60507	24h vs 0h
1.78089	4.66608	1.48639	24h vs 0h
-2.74084	-0.994992	-0.747217	24h vs 0h
-0.844642	-2.92812	-1.30911	24h vs 0h
-2.22152	-2.90773	-1.50376	24h vs 0h
-0.930279	-0.512056	-0.527632	24h vs 0h
-2.25278	-2.20484	-2.77059	24h vs 0h
-0.223006	-4.90766	-2.77446	24h vs 0h
-1.58907	-4.69176	-2.31946	24h vs 0h
-2.25379	-1.25735	-1.08293	24h vs 0h
-3.36221	-0.943556	-1.227	24h vs 0h
-2.97452	-1.35888	-0.895564	24h vs 0h
-3.64496	-1.66458	-0.797481	24h vs 0h
0.0487984	-6.31388	-2.14849	24h vs 0h

## Sheet: Fig. 2b
Figure 2b. Absolute gene expression counts derived from TT-seq data.
	0h_rep1	0h_rep2	12h_rep1	12h_rep2	24h_rep1	24h_rep2	72h_rep1	72h_rep2	96h_rep1	96h_rep2
NFKBIZ	203.039	217.215	6704.1	6858.47	7528.52	7733.98	46462.6	46782.1	88483.2	97849.5

## Sheet: Fig. 2c
Figure 2c. Distribution of enhancer-promoter distances of promoters with and without a ppCBS.
enhancer promoter distance (log10)	promoter with a ppCBS
4.52916	FALSE
4.38027	FALSE
4.21296	FALSE
4.13188	FALSE
3.69276	FALSE
4.08629	FALSE
5.14205	FALSE
4.9786	FALSE
4.94897	FALSE
4.91345	FALSE
4.61476	FALSE
4.60211	FALSE
4.22724	FALSE
3.69609	FALSE
4.1088	FALSE
4.24881	FALSE
4.27049	FALSE
4.40748	FALSE
4.63389	FALSE
4.03743	FALSE
3.84516	FALSE
3.86183	FALSE
4.18932	FALSE
4.55228	FALSE
4.59753	FALSE
4.65684	FALSE
4.73757	FALSE
4.75856	FALSE
4.80046	FALSE
4.83842	FALSE
5.11697	FALSE
4.87543	FALSE
4.62718	FALSE
4.59986	FALSE
4.58309	FALSE
4.55417	FALSE
4.42213	FALSE
4.34626	FALSE
4.17228	FALSE
4.14882	FALSE
4.14183	FALSE
4.56652	FALSE
4.38182	FALSE
4.57727	FALSE
4.62898	FALSE
4.63381	FALSE
4.71204	FALSE
4.783	FALSE
4.82615	FALSE
4.82954	FALSE
4.85664	FALSE
4.95481	FALSE
5.12834	FALSE
3.68913	FALSE
3.85467	FALSE
3.95139	FALSE
4.59275	FALSE
4.7166	FALSE
4.72891	FALSE
4.83005	FALSE
5.02465	FALSE
5.23494	FALSE
5.41828	FALSE
5.20589	FALSE
4.94764	FALSE
4.80067	FALSE
5.12948	FALSE
4.79656	FALSE
4.6207	FALSE
4.61769	FALSE
4.41744	FALSE
4.73089	FALSE
4.53106	FALSE
4.09391	FALSE
3.93263	FALSE
5.00697	FALSE
4.23287	FALSE
4.60249	FALSE
4.74837	FALSE
4.79018	FALSE
5.03931	FALSE
5.14383	FALSE
5.20699	FALSE
5.23624	FALSE
5.39061	FALSE
4.03527	FALSE
4.24736	FALSE
4.26804	FALSE
4.41472	FALSE
5.58909	FALSE
3.71908	TRUE
3.99638	TRUE
4.49256	TRUE
4.67916	TRUE
4.8959	TRUE
4.98493	TRUE
5.20659	TRUE
5.29995	TRUE
5.82095	TRUE
5.80333	TRUE
5.79222	TRUE
5.76552	TRUE
5.74919	TRUE
5.74835	TRUE
5.69446	TRUE
5.67402	TRUE
5.63665	TRUE
5.63591	TRUE
5.16227	TRUE
5.15878	TRUE
4.64797	TRUE
4.53347	TRUE
4.52211	TRUE
4.50798	TRUE
4.50409	TRUE
4.41293	TRUE
4.2205	TRUE
4.24684	TRUE
4.49499	TRUE
4.74531	TRUE
4.85327	TRUE
4.45643	TRUE
4.67536	TRUE
4.67876	TRUE
4.77706	TRUE
4.82592	TRUE
4.83255	TRUE
4.83632	TRUE
4.88038	TRUE
5.06609	TRUE
5.11117	TRUE
5.69894	TRUE
5.15984	TRUE
4.27284	TRUE
4.29292	TRUE
4.48695	TRUE
4.50251	TRUE
4.98032	TRUE
5.06143	TRUE
5.10964	TRUE
5.11998	TRUE
5.12286	TRUE
5.21423	TRUE
5.25632	TRUE
5.28564	TRUE
5.32078	TRUE
5.32163	TRUE
5.33798	TRUE
5.33854	TRUE
5.34475	TRUE
5.35614	TRUE
5.35904	TRUE
5.07592	TRUE
5.04329	TRUE
5.04089	TRUE
4.9977	TRUE
4.98766	TRUE
4.89081	TRUE
4.80869	TRUE
4.33102	TRUE
4.21764	TRUE
4.17389	TRUE
4.11823	TRUE
4.13399	TRUE
4.29959	TRUE
4.44654	TRUE
4.95289	TRUE
4.96324	TRUE
4.96746	TRUE
4.96899	TRUE
5.01968	TRUE
5.05363	TRUE
5.1507	TRUE
5.21064	TRUE
5.21162	TRUE
4.07893	TRUE
3.1827	TRUE
4.38566	TRUE
4.4881	TRUE
4.69517	TRUE
4.94184	TRUE
4.95053	TRUE
4.96077	TRUE
4.96924	TRUE
5.06823	TRUE
5.27695	TRUE
5.27746	TRUE
5.58518	TRUE
5.66254	TRUE
5.39095	TRUE
5.38956	TRUE
5.3882	TRUE
5.36584	TRUE
5.2522	TRUE
5.09095	TRUE
5.06619	TRUE
5.01116	TRUE
5.00771	TRUE
4.7729	TRUE
4.67826	TRUE
4.67319	TRUE
4.51729	TRUE
4.2599	TRUE
3.11494	TRUE
5.15582	TRUE
4.87954	TRUE
4.74734	TRUE
4.72159	TRUE
3.9072	TRUE
4.63427	TRUE
4.90949	TRUE
5.00853	TRUE
5.58181	TRUE
4.88879	TRUE
4.80612	TRUE
4.75422	TRUE
4.7521	TRUE
4.65216	TRUE
4.6433	TRUE
4.61518	TRUE
4.57603	TRUE
4.4812	TRUE
4.38933	TRUE
4.38072	TRUE
4.34181	TRUE
4.32652	TRUE
3.31492	TRUE
4.92256	TRUE
4.70441	TRUE
5.21983	TRUE
5.59126	TRUE
5.66753	TRUE
5.66974	TRUE
5.82282	TRUE
4.5219	TRUE
4.74055	TRUE
4.7473	TRUE
4.81286	TRUE
5.33008	TRUE
4.54866	TRUE
4.53782	TRUE
3.64414	TRUE
4.60147	TRUE
4.6524	TRUE
4.97016	TRUE
4.98232	TRUE
4.98366	TRUE
5.09975	TRUE
5.78712	TRUE
5.38241	TRUE
5.3374	TRUE
5.33665	TRUE
5.33588	TRUE
4.96578	TRUE
4.73241	TRUE
5.24968	TRUE
5.31924	TRUE
5.32107	TRUE
5.49065	TRUE
5.50391	TRUE
5.4257	TRUE
5.39229	TRUE
5.38342	TRUE
5.3767	TRUE
5.32351	TRUE
5.32224	TRUE
5.07999	TRUE
4.94725	TRUE
4.94284	TRUE
4.93415	TRUE
4.82685	TRUE
4.28646	TRUE
4.27898	TRUE
4.01149	TRUE
4.56884	TRUE
4.88197	TRUE
4.91964	TRUE
5.31702	TRUE
4.37588	TRUE
4.76919	TRUE
5.08821	TRUE
5.09934	TRUE
5.1684	TRUE
5.19137	TRUE
5.26923	TRUE
5.28785	TRUE
5.33927	TRUE
5.41531	TRUE
5.41672	TRUE
5.43288	TRUE
5.43345	TRUE
5.45414	TRUE
5.46713	TRUE
5.54591	TRUE
5.55507	TRUE
5.58551	TRUE
5.82409	TRUE
5.89351	TRUE
6.03757	TRUE
6.06292	TRUE
6.12273	TRUE
6.12883	TRUE
5.55727	TRUE
5.50109	TRUE
5.49989	TRUE
5.40246	TRUE
5.36397	TRUE
4.81078	TRUE
4.30425	TRUE
3.95501	TRUE
3.39111	TRUE
3.28012	TRUE
3.12189	TRUE
4.27082	TRUE
4.28237	TRUE
4.30016	TRUE
4.31254	TRUE
4.41369	TRUE
4.41782	TRUE
4.63912	TRUE
4.70406	TRUE
4.82032	TRUE
4.82665	TRUE
4.94673	TRUE
4.95324	TRUE
5.29092	TRUE
5.34407	TRUE
5.36707	TRUE
5.52692	TRUE
5.53838	TRUE
5.53924	TRUE
5.53982	TRUE
5.56121	TRUE
5.73895	TRUE
5.86288	TRUE
5.94342	TRUE
5.99365	TRUE
5.64098	TRUE
5.62447	TRUE
4.99346	TRUE
4.69903	TRUE
4.39928	TRUE
4.08962	TRUE
3.21299	TRUE
4.09708	TRUE
4.10548	TRUE
4.37127	TRUE
4.38484	TRUE
4.54194	TRUE
4.66894	TRUE
4.67242	TRUE
4.78165	TRUE
4.79085	TRUE
5.83427	TRUE
5.06701	TRUE
4.77709	TRUE
4.75706	TRUE
4.12509	TRUE
4.49115	TRUE
4.61997	TRUE
4.81491	TRUE
4.85337	TRUE
4.8274	TRUE
3.59539	TRUE
3.99317	TRUE
4.07368	TRUE
4.54251	TRUE
4.61835	TRUE
4.78261	TRUE
4.88433	TRUE
5.19285	TRUE
5.22476	TRUE
5.23368	TRUE
5.23241	TRUE
4.54632	TRUE
4.42726	TRUE
4.42197	TRUE
4.18907	TRUE
3.95501	TRUE
3.09061	TRUE
3.91677	TRUE
4.22126	TRUE
4.34282	TRUE
4.39477	TRUE
5.01061	TRUE
4.8047	TRUE
4.06096	TRUE
4.19025	TRUE
5.38341	TRUE
5.35427	TRUE
5.07301	TRUE
5.04486	TRUE
5.0053	TRUE
4.72604	TRUE
4.7234	TRUE
3.4612	TRUE
3.39445	TRUE
4.07831	TRUE
4.11291	TRUE
5.71146	TRUE
5.71183	TRUE
4.84038	TRUE
4.65633	TRUE
4.65164	TRUE
4.48393	TRUE
4.45977	TRUE
4.45122	TRUE
4.00398	TRUE
4.46941	TRUE
4.57444	TRUE
4.86743	TRUE
4.90039	TRUE
4.9224	TRUE
5.07784	TRUE
4.97304	TRUE
4.53111	TRUE
4.45468	TRUE
4.34244	TRUE
3.96581	TRUE
4.47169	TRUE
5.90434	TRUE
5.89181	TRUE
5.61248	TRUE
5.54281	TRUE
5.41833	TRUE
5.40192	TRUE
5.33996	TRUE
5.33939	TRUE
5.28166	TRUE
5.28054	TRUE
3.2266	TRUE
3.08672	TRUE
4.48177	TRUE
5.28592	TRUE
5.40306	TRUE
5.43577	TRUE

## Sheet: Fig. 2d
Figure 2d. Interaction frequencies of ppCBS of iMac-specific genes.
chr	start	end	viewpoint	0h	24h	96h	annotation
chr1	12118720	12118871	TNFRSF1B	1.46378	4.64625	8.32511	CTCF
chr1	12124888	12125272	TNFRSF1B	3.05492	9.6393	37.7886	CTCF
chr1	12143687	12144212	TNFRSF1B	1.77154	5.20343	13.8693	CTCF
chr1	12184264	12184602	TNFRSF1B	1.54624	4.55784	12.4717	CTCF
chr1	12196726	12196987	TNFRSF1B	1.96334	4.27687	9.90553	CTCF
chr1	12208928	12209152	TNFRSF1B	3.3271	5.09615	11.9836	CTCF
chr1	166910482	166910724	CREG1	4.71313	4.82949	3.61012	CTCF
chr1	167057349	167057508	CREG1	3.03642	1.60986	0.513572	CTCF
chr1	167059268	167059469	CREG1	2.97941	2.62559	1.3641	CTCF
chr1	167066535	167067057	CREG1	6.97533	7.83773	5.99414	CTCF
chr1	167267916	167268162	CREG1	10.6632	12.0093	16.9605	CTCF
chr1	167401293	167401683	CREG1	10.9244	11.545	23.418	CTCF
chr1	167442148	167442489	CREG1	6.02621	5.78376	9.7866	CTCF
chr1	167520948	167521074	CREG1	2.05649	3.27233	3.54026	CTCF
chr1	167533818	167534275	CREG1	4.73602	5.69286	10.0228	CTCF
chr1	167540429	167540712	CREG1	5.05244	5.13014	11.1578	CTCF
chr1	167553817	167553977	CREG1	37.0413	32.8068	33.2985	CTCF
chr1	167599834	167600613	CREG1	4.43392	5.45923	9.6777	CTCF
chr1	167617220	167618087	CREG1	3.64794	4.19303	4.55329	CTCF
chr1	167630024	167630171	CREG1	2.28371	3.17578	5.41958	CTCF
chr1	167637242	167637602	CREG1	3.05842	2.76737	8.44456	CTCF
chr1	167687596	167688287	CREG1	15.1541	12.7665	17.7966	CTCF
chr1	167715479	167715707	CREG1	5.93181	3.8785	3.3423	CTCF
chr1	167803228	167803742	CREG1	3.30274	3.10208	2.54593	CTCF
chr1	168082243	168082564	CREG1	2.91248	3.08843	2.21624	CTCF
chr2	27683453	27683842	FOSL2	10.8179	9.46993	7.98704	CTCF
chr2	27703772	27704337	FOSL2	27.0838	23.5994	19.2204	CTCF
chr2	27715573	27715721	FOSL2	2.80113	2.51378	2.44725	CTCF
chr2	27723318	27723603	FOSL2	8.53874	8.5132	8.8085	CTCF
chr2	27754092	27754749	FOSL2	12.7549	16.4941	25.7978	CTCF
chr2	27807585	27807758	FOSL2	4.87027	4.36831	4.2747	CTCF
chr2	27954866	27955383	FOSL2	4.09345	9.27112	10.7697	CTCF
chr2	28155679	28155997	FOSL2	7.61444	6.6126	2.68448	CTCF
chr2	28340704	28340835	FOSL2	3.10657	1.78388	1.9211	CTCF
chr2	28379112	28379319	FOSL2	1.50648	3.329	2.756	CTCF
chr2	28419407	28419599	FOSL2	4.88023	3.41331	2.42912	CTCF
chr2	28452372	28452796	FOSL2	7.80385	7.9701	15.6557	CTCF
chr3	45938816	45939182	CCR1	2.0263	3.59596	4.69758	CTCF
chr3	46078915	46079160	CCR1	4.32178	6.60378	6.66383	CTCF
chr3	46087958	46088232	CCR1	2.4865	9.94367	22.0662	CTCF
chr3	46100816	46101166	CCR1	0.714506	1.85907	3.88552	CTCF
chr3	46183400	46183652	CCR1	1.21372	2.42319	3.28117	CTCF
chr3	46208382	46208575	CCR1	9.6091	15.5701	18.6714	CTCF
chr3	46228810	46229293	CCR1	2.83965	5.35955	9.55769	CTCF
chr3	46245203	46245343	CCR1	0.756947	1.2127	3.4603	CTCF
chr3	46276653	46276773	CCR1	1.96761	3.23356	4.12199	CTCF
chr3	46293373	46293584	CCR1	1.63616	2.99128	7.47686	CTCF
chr3	46368306	46368954	CCR1	9.68593	24.4091	55.101	CTCF
chr3	46372518	46372791	CCR1	18.9051	25.6908	43.4492	CTCF
chr3	46378366	46378646	CCR1	17.0231	16.0326	20.2449	CTCF
chr3	46394069	46394222	CCR1	0.850356	1.40278	2.83168	CTCF
chr3	46427370	46427677	CCR1	1.47801	1.38488	2.99685	CTCF
chr3	46447263	46447561	CCR1	0.401933	0.971087	4.49084	CTCF
chr3	46488740	46488974	CCR1	2.92588	2.78928	4.65654	CTCF
chr3	46558216	46558593	CCR1	4.61645	4.29682	5.57639	CTCF
chr3	101677255	101677416	NFKBIZ	0.860328	2.47699	2.21965	CTCF
chr3	101813843	101814028	NFKBIZ	5.77348	9.42778	14.7487	CTCF
chr3	101827854	101828110	NFKBIZ	6.10476	5.94694	8.7818	CTCF
chr3	102224316	102224482	NFKBIZ	8.07334	18.6004	16.6496	CTCF
chr3	102225438	102225660	NFKBIZ	8.39881	12.5736	15.2489	CTCF
chr4	25842311	25842493	RBPJ	1.63473	1.69491	2.58481	CTCF
chr4	25925897	25926081	RBPJ	2.3913	2.19638	5.62437	CTCF
chr4	25988231	25988463	RBPJ	2.01309	2.56204	4.98831	CTCF
chr4	26020169	26020448	RBPJ	0.533701	0.688446	3.59525	CTCF
chr4	26028804	26029582	RBPJ	4.35755	9.43015	16.8629	CTCF
chr4	26061332	26061603	RBPJ	1.70837	4.92049	9.81433	CTCF
chr4	26081837	26082278	RBPJ	5.27243	10.1259	10.9684	CTCF
chr4	26150811	26151414	RBPJ	0.655275	3.62452	13.011	CTCF
chr4	26161561	26161693	RBPJ	0.633531	2.10655	3.86969	CTCF
chr4	26288267	26288972	RBPJ	1.32842	4.81758	11.5338	CTCF
chr4	26330359	26330458	RBPJ	8.13114	6.79718	4.94862	CTCF
chr4	26410746	26410983	RBPJ	3.8533	5.36003	8.62271	CTCF
chr4	26720072	26720203	RBPJ	3.33302	2.68584	4.29922	CTCF
chr4	27010466	27010602	RBPJ	2.22847	3.90732	2.77327	CTCF
chr5	140239972	140240127	CD14	4.60653	3.84054	2.70165	CTCF
chr5	140244564	140244798	CD14	4.50631	7.01044	3.75835	CTCF
chr5	140346800	140346899	CD14	2.36397	3.16594	1.89452	CTCF
chr5	140351869	140351986	CD14	2.39297	2.77084	2.17537	CTCF
chr5	140357664	140357888	CD14	3.52371	4.34934	3.71685	CTCF
chr5	140363275	140363452	CD14	4.29036	5.1991	4.33851	CTCF
chr5	140372945	140373280	CD14	4.88372	7.43892	4.50836	CTCF
chr5	140400613	140400780	CD14	1.95491	2.84463	2.40688	CTCF
chr5	140401395	140401939	CD14	4.62269	5.94238	5.33895	CTCF
chr5	140547442	140548470	CD14	11.1583	18.6441	25.7951	CTCF
chr5	140557341	140557786	CD14	6.66803	10.2645	19.5008	CTCF
chr5	140575437	140575725	CD14	2.93648	8.54528	27.5166	CTCF
chr5	140633150	140633488	CD14	7.39945	11.305	19.5009	CTCF
chr5	140635101	140635276	CD14	18.6705	29.0978	43.3192	CTCF
chr5	140691037	140691687	CD14	4.84416	4.4324	5.16757	CTCF
chr5	140710858	140711450	CD14	1.75514	2.35579	3.59174	CTCF
chr5	140720305	140720457	CD14	2.36068	1.78911	3.41273	CTCF
chr5	141041152	141041432	CD14	2.06922	2.02326	3.53179	CTCF
chr6	138816178	138816323	CITED2	2.65929	3.74077	2.82694	CTCF
chr6	139124983	139125225	CITED2	3.89958	5.15263	4.11467	CTCF
chr6	139219271	139219542	CITED2	8.10836	5.22164	6.57879	CTCF
chr6	139364523	139364631	CITED2	9.08154	6.4117	4.44246	CTCF
chr6	139375414	139375579	CITED2	35.5092	26.1565	24.6304	CTCF
chr6	139881792	139881903	CITED2	2.56401	1.79269	3.52095	CTCF
chr6	139927403	139927567	CITED2	1.25975	1.37565	3.76142	CTCF
chr6	140441282	140441583	CITED2	1.40524	1.82918	12.4006	CTCF
chr6	140921676	140921904	CITED2	4.09587	5.38707	9.26003	CTCF
chr8	54758897	54759029	LYN	0.503968	1.9196	3.66029	CTCF
chr8	55313503	55313638	LYN	2.03395	4.38788	3.38552	CTCF
chr8	55815194	55815368	LYN	6.28073	6.32631	12.551	CTCF
chr8	55818910	55819152	LYN	1.88928	4.11547	18.5835	CTCF
chr8	55843608	55843740	LYN	1.91029	2.05723	6.40885	CTCF
chr8	55885612	55885869	LYN	14.4921	25.9484	26.095	CTCF
chr8	55930484	55930850	LYN	0.354287	6.20617	14.2698	CTCF
chr8	55939639	55940275	LYN	1.32273	3.95056	8.90651	CTCF
chr8	55991235	55991484	LYN	0.423471	2.00436	5.7849	CTCF
chr8	56006555	56006759	LYN	1.52892	2.24929	3.72564	CTCF
chr8	56010721	56010846	LYN	4.39008	6.12493	6.34866	CTCF
chr8	56028848	56029156	LYN	4.64573	4.61819	7.22153	CTCF
chr8	56060263	56060389	LYN	1.74754	2.59647	3.35885	CTCF
chr8	56074378	56074692	LYN	2.08562	3.59512	3.90848	CTCF
chr8	56189315	56189426	LYN	2.5944	2.86461	2.88389	CTCF
chr8	114846714	114846931	TRPS1	1.38757	1.33962	8.04143	CTCF
chr8	115076776	115077005	TRPS1	1.33174	1.12428	5.58625	CTCF
chr8	115409933	115410165	TRPS1	1.94894	3.13558	10.3078	CTCF
chr8	115536939	115537111	TRPS1	0.148803	0.775445	4.53103	CTCF
chr8	116354529	116354707	TRPS1	0.487536	0.71823	2.77185	CTCF
chr8	116447900	116448231	TRPS1	0.316338	0.672307	3.33552	CTCF
chr8	124593027	124593244	TRIB1	2.30585	2.57609	1.51729	CTCF
chr8	125091664	125091925	TRIB1	2.40066	2.97676	2.00702	CTCF
chr8	125118422	125119688	TRIB1	12.9677	13.4983	18.3191	CTCF
chr8	125230494	125231045	TRIB1	10.9737	7.06422	3.18411	CTCF
chr8	125278326	125278524	TRIB1	3.15431	1.97301	1.27013	CTCF
chr8	125334174	125334326	TRIB1	2.43604	1.43062	2.5026	CTCF
chr8	125338086	125338228	TRIB1	2.12698	2.1554	2.80138	CTCF
chr8	125385893	125386233	TRIB1	0.52803	0.896496	2.5129	CTCF
chr8	125417658	125418215	TRIB1	3.17105	3.42274	2.06399	CTCF
chr8	125505477	125505971	TRIB1	1.52966	4.13294	6.18184	CTCF
chr8	125644207	125644977	TRIB1	8.1791	12.9618	16.9782	CTCF
chr8	125696780	125697056	TRIB1	3.96782	4.87523	5.64225	CTCF
chr8	125700710	125700978	TRIB1	3.22266	5.28194	6.10064	CTCF
chr8	125702656	125702758	TRIB1	1.86212	2.67623	2.22277	CTCF
chr9	107422302	107422490	KLF4	7.98804	2.46766	4.84944	CTCF
chr9	107465664	107465861	KLF4	2.78535	5.03289	6.28081	CTCF
chr9	107637653	107637899	KLF4	0.610142	3.61475	8.48239	CTCF
chr9	107674925	107675158	KLF4	0.17836	1.0316	3.59262	CTCF
chr9	107866763	107867187	KLF4	0.917371	3.83498	7.7163	CTCF
chr9	108272575	108272815	KLF4	1.34717	3.45932	11.5263	CTCF
chr9	108565748	108566038	KLF4	8.33873	7.88355	10.5126	CTCF
chr9	108671282	108671484	KLF4	4.69731	5.46711	5.65625	CTCF
chr9	108761861	108762066	KLF4	10.7933	6.65899	8.31401	CTCF
chr9	108813999	108814264	KLF4	4.26971	6.9219	10.3123	CTCF
chr10	3192973	3193114	KLF6	4.30965	3.78791	5.40582	CTCF
chr10	3197457	3197810	KLF6	4.22461	6.10548	7.10973	CTCF
chr10	3239648	3240012	KLF6	16.2518	18.0604	27.2172	CTCF
chr10	3394553	3394864	KLF6	4.89485	4.65984	7.48489	CTCF
chr10	3420073	3420214	KLF6	1.37918	2.07745	2.62488	CTCF
chr10	3452434	3452613	KLF6	2.12752	3.3523	5.80629	CTCF
chr10	3455508	3455897	KLF6	3.93469	4.33871	6.30125	CTCF
chr10	3467441	3467685	KLF6	2.18411	1.8208	6.17698	CTCF
chr10	3484608	3484743	KLF6	1.91194	2.69121	2.71897	CTCF
chr10	3485316	3485558	KLF6	1.56407	3.98611	3.60301	CTCF
chr10	4344599	4344912	KLF6	0.0367836	0.776952	2.49864	CTCF
chr10	4656592	4656873	KLF6	5.10676	5.81616	7.84827	CTCF
chr10	4767158	4767333	KLF6	5.93945	6.36416	13.7468	CTCF
chr10	4771299	4771400	KLF6	2.19967	2.65737	5.4091	CTCF
chr10	68897587	68897728	SRGN	3.35577	1.7639	0.741265	CTCF
chr10	68955475	68956267	SRGN	8.49192	5.13856	2.81374	CTCF
chr10	68969606	68969872	SRGN	3.28241	2.23246	1.47302	CTCF
chr10	68981061	68981396	SRGN	10.9442	4.74222	3.20635	CTCF
chr10	68988540	68989632	SRGN	12.7277	6.67227	6.64722	CTCF
chr10	69004889	69005344	SRGN	51.2324	62.4684	76.6181	CTCF
chr10	69007277	69007680	SRGN	7.76517	23.7953	44.6406	CTCF
chr10	69057251	69057604	SRGN	1.87464	11.5394	11.2173	CTCF
chr10	69123276	69124263	SRGN	7.73932	10.6689	16.2417	CTCF
chr10	69222249	69222541	SRGN	2.45542	3.42145	3.3975	CTCF
chr10	69237567	69237904	SRGN	2.38842	3.27416	1.73866	CTCF
chr10	69392372	69392869	SRGN	5.56031	6.13061	4.02997	CTCF
chr10	69407885	69408037	SRGN	1.55834	2.55709	1.37606	CTCF
chr10	69413315	69413540	SRGN	2.29889	2.54909	3.67688	CTCF
chr10	69507853	69508105	SRGN	2.7714	2.3743	1.55777	CTCF
chr10	71896500	71896720	DDIT4	2.27894	3.57145	4.81443	CTCF
chr10	71956199	71956333	DDIT4	1.17478	2.16485	3.62985	CTCF
chr10	72048585	72048936	DDIT4	3.0298	5.34419	7.29045	CTCF
chr10	72126308	72126522	DDIT4	4.09788	4.392	8.7631	CTCF
chr10	72132507	72132647	DDIT4	3.00628	3.1858	6.84879	CTCF
chr10	72215941	72216080	DDIT4	2.87199	3.12197	3.54019	CTCF
chr10	72216204	72216378	DDIT4	1.90076	1.44225	3.30198	CTCF
chr10	72222888	72223096	DDIT4	6.33631	5.82473	8.55909	CTCF
chr10	72255174	72255437	DDIT4	7.37188	7.25754	12.4554	CTCF
chr10	72261085	72261235	DDIT4	5.8274	3.70781	3.51511	CTCF
chr10	72293271	72293384	DDIT4	2.90954	3.9133	8.73432	CTCF
chr10	72327972	72328595	DDIT4	8.90329	17.3444	41.2572	CTCF
chr10	72334843	72335349	DDIT4	10.3211	14.3732	17.4858	CTCF
chr10	72337039	72337455	DDIT4	14.3909	14.6425	25.6934	CTCF
chr10	72340513	72340695	DDIT4	17.3133	11.436	23.3243	CTCF
chr10	72354824	72355122	DDIT4	2.11513	1.79938	3.29399	CTCF
chr10	72364377	72364544	DDIT4	2.97471	2.51819	3.08805	CTCF
chr10	72834347	72834554	DDIT4	1.59631	2.00779	3.85665	CTCF
chr10	97037418	97037595	FRAT2	2.93257	2.40779	1.62367	CTCF
chr10	97072904	97073184	FRAT2	6.78341	5.60704	4.53988	CTCF
chr10	97081721	97081894	FRAT2	4.40237	4.46814	5.00551	CTCF
chr10	97210601	97210806	FRAT2	5.07305	4.28644	3.66514	CTCF
chr10	97234508	97234675	FRAT2	7.88874	4.46652	7.09545	CTCF
chr10	97278420	97279085	FRAT2	12.3404	12.1925	15.8162	CTCF
chr10	97291884	97292340	FRAT2	3.47112	3.97444	5.05445	CTCF
chr10	97292520	97292878	FRAT2	4.94515	5.10325	5.60243	CTCF
chr10	97319433	97319620	FRAT2	9.09632	13.4315	17.1765	CTCF
chr10	97320106	97320553	FRAT2	10.8431	9.08243	8.37067	CTCF
chr10	97355591	97355926	FRAT2	5.86923	7.11295	12.7114	CTCF
chr10	97356555	97356841	FRAT2	4.89806	5.82429	9.84268	CTCF
chr10	97401220	97401468	FRAT2	3.18332	3.89778	4.78717	CTCF
chr10	97407253	97407465	FRAT2	2.77946	4.28935	5.31083	CTCF
chr10	97407553	97407652	FRAT2	1.31951	2.35869	3.05781	CTCF
chr10	97426050	97426232	FRAT2	2.1035	2.61978	3.63736	CTCF
chr10	97445962	97446168	FRAT2	1.58778	2.44674	2.00831	CTCF
chr11	33808364	33808489	LMO2	3.97506	2.89512	4.69803	CTCF
chr11	33970976	33971359	LMO2	33.5554	25.7431	25.2857	CTCF
chr11	33984726	33984949	LMO2	4.25926	5.74118	7.76257	CTCF
chr11	33988055	33988257	LMO2	6.42004	5.89657	13.5086	CTCF
chr11	33997121	33997248	LMO2	2.92774	3.10835	2.43704	CTCF
chr11	34359329	34359543	LMO2	3.83939	2.84716	2.01615	CTCF
chr11	58654098	58654343	MPEG	2.53849	1.64097	1.4829	CTCF
chr11	59097199	59097437	MPEG	2.47681	1.74795	1.60319	CTCF
chr11	59135891	59136291	MPEG	2.648	2.5639	1.70101	CTCF
chr11	59142358	59142928	MPEG	3.4677	3.96401	2.80683	CTCF
chr11	59144633	59144834	MPEG	3.03743	2.159	2.37536	CTCF
chr11	59158391	59158816	MPEG	6.07413	5.17522	4.51084	CTCF
chr11	59171175	59172366	MPEG	42.303	33.168	39.5018	CTCF
chr11	59200270	59200576	MPEG	7.71846	7.901	11.584	CTCF
chr11	59206753	59206979	MPEG	66.3714	61.5589	68.0863	CTCF
chr11	59263278	59263578	MPEG	3.16767	3.99175	7.92148	CTCF
chr11	59267149	59267562	MPEG	4.03035	2.81651	3.97882	CTCF
chr11	59283876	59285545	MPEG	7.27491	9.64518	15.8747	CTCF
chr11	59429754	59430314	MPEG	14.0484	11.6501	12.2848	CTCF
chr11	59680583	59680849	MPEG	3.52697	3.82955	4.08977	CTCF
chr15	48861955	48862126	ATP8B4	2.93354	2.86507	5.415	CTCF
chr15	49235611	49235922	ATP8B4	5.65024	4.27538	11.7842	CTCF
chr15	49370934	49371073	ATP8B4	0.800394	0.759108	2.92354	CTCF
chr15	49471368	49471507	ATP8B4	0.965555	0.941807	3.92383	CTCF
chr15	49620946	49621103	ATP8B4	0.957461	0.929357	2.45458	CTCF
chr15	49902451	49902585	ATP8B4	0.0581721	1.00155	3.52691	CTCF
chr15	50003796	50004026	ATP8B4	2.14698	2.99706	8.00802	CTCF
chr15	50051958	50052141	ATP8B4	1.12548	3.23793	6.89331	CTCF
chr15	50116600	50116741	ATP8B4	1.71611	4.61625	17.501	CTCF
chr15	50145450	50145639	ATP8B4	3.19573	3.29172	6.95587	CTCF
chr15	50316168	50316313	ATP8B4	2.25848	2.33887	6.4235	CTCF
chr16	30935162	30935476	ITGAX	0.425317	1.70198	3.25784	CTCF
chr16	30953732	30953905	ITGAX	1.2742	3.92546	3.78343	CTCF
chr16	30972954	30973251	ITGAX	1.29786	2.69266	1.92734	CTCF
chr16	30984855	30985423	ITGAX	4.03751	10.1948	10.3771	CTCF
chr16	31025990	31026225	ITGAX	1.22704	1.50361	4.34121	CTCF
chr16	31074197	31074529	ITGAX	1.84701	3.49078	3.83839	CTCF
chr16	31074634	31075073	ITGAX	1.58098	2.7859	1.80749	CTCF
chr16	31095844	31096193	ITGAX	1.03379	2.90097	5.34128	CTCF
chr16	31105757	31105947	ITGAX	0.900432	1.03577	3.62405	CTCF
chr16	31142155	31142901	ITGAX	1.02415	3.05676	4.86582	CTCF
chr16	31159719	31160031	ITGAX	2.25154	4.54845	4.99809	CTCF
chr16	31200848	31201305	ITGAX	5.11606	10.8572	20.647	CTCF
chr16	31259792	31260071	ITGAX	1.20296	3.26034	5.19694	CTCF
chr16	31265181	31265595	ITGAX	1.16616	7.1485	8.4675	CTCF
chr16	31299096	31299276	ITGAX	2.71304	6.62327	10.7979	CTCF
chr16	31333704	31334234	ITGAX	2.66459	4.06568	9.26883	CTCF
chr16	31382446	31382907	ITGAX	3.98335	8.32965	13.2542	CTCF
chr16	31442746	31443364	ITGAX	3.14791	5.61098	10.0718	CTCF
chr16	31451765	31452021	ITGAX	1.04241	1.84142	3.05902	CTCF
chr16	31696863	31697245	ITGAX	2.22675	4.13275	6.42518	CTCF
chr16	31868691	31868919	ITGAX	1.45085	3.7261	6.57969	CTCF
chr16	85819289	85819508	IRF8	12.5292	11.7079	15.4572	CTCF
chr16	85821465	85822504	IRF8	22.2791	33.7761	45.6079	CTCF
chr16	85826554	85826753	IRF8	13.0427	21.4524	22.2177	CTCF
chr16	85832584	85832908	IRF8	6.63454	9.14762	9.86896	CTCF
chr16	85839678	85839858	IRF8	1.85165	2.75626	4.34891	CTCF
chr16	85847796	85848143	IRF8	2.51741	5.56861	8.76588	CTCF
chr16	85859840	85860009	IRF8	1.65947	3.48395	9.97804	CTCF
chr16	85862979	85863121	IRF8	1.80409	5.2932	7.86257	CTCF
chr16	85936161	85936421	IRF8	2.69522	4.54784	5.10504	CTCF
chr16	85986897	85987897	IRF8	4.10331	7.43473	10.5166	CTCF
chr16	86016222	86016706	IRF8	10.3706	14.3498	19.728	CTCF
chr16	86517719	86517969	IRF8	1.99295	2.6347	4.94814	CTCF
chr16	86520185	86520357	IRF8	1.03413	2.09631	3.68712	CTCF
chr19	33126002	33126134	CEBPa	5.33918	3.17999	3.07544	CTCF
chr19	33144015	33144142	CEBPa	4.42487	4.11558	2.3629	CTCF
chr19	33235349	33235505	CEBPa	17.5976	12.3587	10.1535	CTCF
chr19	33241948	33242056	CEBPa	6.73496	5.09983	4.44228	CTCF
chr19	33406946	33407074	CEBPa	7.09446	7.71711	9.14985	CTCF
chr20	22339239	22339382	CD93	0.964171	1.54115	3.69261	CTCF
chr20	22691733	22691951	CD93	1.35522	2.11274	6.46692	CTCF
chr20	23021677	23021788	CD93	0.487264	0.632705	3.32343	CTCF
chr20	23050892	23051053	CD93	0.279543	2.15062	5.0419	CTCF
chr20	23125571	23125992	CD93	2.60086	5.10712	11.6201	CTCF
chr20	23143188	23143357	CD93	0.897264	3.28829	8.28574	CTCF
chr20	23152424	23152568	CD93	1.22017	1.28622	5.32052	CTCF
chr20	23165315	23165450	CD93	0.939561	2.27394	6.40718	CTCF
chr20	23235457	23235687	CD93	1.36713	4.02718	12.6548	CTCF
chr20	23245674	23246001	CD93	1.12621	1.59877	6.67446	CTCF
chr20	23340521	23340769	CD93	1.58474	4.61128	13.2197	CTCF
chr20	39049858	39050487	MAFB	2.2094	2.74588	2.7645	CTCF
chr20	39112103	39112423	MAFB	6.75694	5.69892	8.57999	CTCF
chr20	39264652	39264854	MAFB	4.0626	3.8284	4.70541	CTCF
chr20	39269001	39269426	MAFB	10.2171	10.3771	13.7312	CTCF
chr20	39289443	39289627	MAFB	1.37936	1.98046	2.6443	CTCF
chr20	39829366	39829590	MAFB	2.04201	2.28309	7.55233	CTCF
chr20	39874138	39874353	MAFB	1.88687	1.85802	3.80701	CTCF
chr20	39886066	39887171	MAFB	6.30247	5.35837	13.2059	CTCF
chr20	40090315	40090509	MAFB	0.319548	0.765059	2.45334	CTCF
chr20	40160077	40160561	MAFB	3.52569	9.88235	12.5918	CTCF
chr20	40265828	40266697	MAFB	5.49311	7.59905	3.88171	CTCF
chr20	40326680	40327182	MAFB	0.303717	2.71548	9.73879	CTCF
chr20	40470981	40471625	MAFB	1.39889	1.67456	5.57829	CTCF
chr20	40506493	40507087	MAFB	0.445802	4.11781	8.09924	CTCF
chr20	40532231	40532391	MAFB	2.41758	3.01685	2.7446	CTCF
chr20	40728591	40728723	MAFB	1.90394	2.48308	2.03279	CTCF
chr20	40741556	40741781	MAFB	1.82923	2.23035	4.43732	CTCF
chr20	40945796	40946295	MAFB	8.8738	8.47229	13.5631	CTCF
chr20	40962835	40963334	MAFB	7.41783	7.78357	8.76332	CTCF
chr20	40968845	40968958	MAFB	4.41257	1.82919	1.96798	CTCF
chr1	12132930	12133317	TNFRSF1B	2.5458	4.68262	10.8768	Enhancer
chr1	12153270	12153569	TNFRSF1B	3.26673	5.53187	12.2243	Enhancer
chr1	12162017	12162145	TNFRSF1B	31.8958	52.3817	53.0471	Enhancer
chr1	12179129	12179308	TNFRSF1B	4.19441	6.64305	9.8407	Enhancer
chr1	167447672	167448110	CREG1	1.02697	2.09631	3.18249	Enhancer
chr1	167548454	167548663	CREG1	3.32647	6.71091	11.9793	Enhancer
chr1	167563515	167563863	CREG1	4.33848	7.20834	18.2637	Enhancer
chr1	167584696	167585023	CREG1	2.2029	4.04607	3.24221	Enhancer
chr1	167587991	167588345	CREG1	1.42087	1.42011	3.42908	Enhancer
chr1	167601347	167601779	CREG1	1.9304	4.46659	10.0398	Enhancer
chr1	167602145	167602244	CREG1	2.9121	3.22591	2.76912	Enhancer
chr1	167612677	167612940	CREG1	0.638206	1.54566	4.04518	Enhancer
chr1	167627713	167627922	CREG1	1.06117	2.1252	6.1677	Enhancer
chr1	167628149	167628297	CREG1	2.46673	2.20179	3.29539	Enhancer
chr1	167630836	167631011	CREG1	1.82731	2.24302	5.52821	Enhancer
chr1	167632151	167632301	CREG1	1.08585	1.5815	4.68663	Enhancer
chr1	167632380	167632591	CREG1	1.88828	4.0407	6.41298	Enhancer
chr1	167650281	167650504	CREG1	1.63883	2.40274	2.48234	Enhancer
chr1	167714589	167714797	CREG1	3.79339	2.12208	2.75994	Enhancer
chr2	27704588	27704823	FOSL2	4.67292	6.52843	4.05046	Enhancer
chr2	27756892	27757186	FOSL2	1.16387	4.7043	10.3057	Enhancer
chr2	27809766	27810216	FOSL2	0.99962	3.65189	4.5262	Enhancer
chr2	27831347	27831552	FOSL2	0.802582	1.97014	3.23416	Enhancer
chr2	27897882	27898026	FOSL2	0.247392	1.64405	2.92676	Enhancer
chr2	27959599	27959732	FOSL2	1.30414	3.13487	5.63884	Enhancer
chr2	27960317	27960486	FOSL2	1.33321	1.81004	3.83032	Enhancer
chr2	28247236	28247716	FOSL2	3.86293	2.87322	0.770819	Enhancer
chr2	28248540	28248744	FOSL2	3.27987	1.63263	0.931218	Enhancer
chr2	28359253	28359661	FOSL2	3.39048	3.13968	3.07169	Enhancer
chr2	28366823	28367087	FOSL2	3.37421	3.85892	2.24171	Enhancer
chr2	28410447	28410709	FOSL2	5.99316	4.31961	3.9066	Enhancer
chr2	28424009	28424141	FOSL2	2.28872	2.40091	3.57629	Enhancer
chr2	28448207	28448598	FOSL2	1.14552	1.86816	4.45347	Enhancer
chr3	46089080	46089624	CCR1	0.630604	3.7371	8.35476	Enhancer
chr3	46089827	46090008	CCR1	0.968822	2.39707	5.58409	Enhancer
chr3	46098450	46098789	CCR1	0.779556	3.1453	4.33524	Enhancer
chr3	46186820	46186974	CCR1	2.53059	3.19014	2.33117	Enhancer
chr3	46187176	46187328	CCR1	4.96683	3.54005	3.29028	Enhancer
chr3	46191890	46192080	CCR1	1.06019	3.0325	2.8012	Enhancer
chr3	46222819	46223053	CCR1	3.07933	7.78292	13.0786	Enhancer
chr3	46228304	46228648	CCR1	2.65892	6.10677	10.7947	Enhancer
chr3	46236339	46236573	CCR1	1.17722	1.41251	3.91808	Enhancer
chr3	46298190	46298323	CCR1	1.09347	2.27595	5.13357	Enhancer
chr3	46300206	46300542	CCR1	0.698978	1.28919	5.16702	Enhancer
chr3	46301173	46301418	CCR1	0.514944	1.23875	4.91418	Enhancer
chr3	46312956	46313391	CCR1	0.400641	2.77031	8.83383	Enhancer
chr3	46321528	46321801	CCR1	0.829231	2.9754	3.587	Enhancer
chr3	46349885	46350046	CCR1	1.68249	2.28915	3.49965	Enhancer
chr3	46371270	46371369	CCR1	2.08259	5.50104	11.8347	Enhancer
chr3	101827235	101827362	NFKBIZ	3.51408	3.82482	5.94521	Enhancer
chr3	101898766	101899080	NFKBIZ	1.71483	4.50624	5.71273	Enhancer
chr3	101936698	101936963	NFKBIZ	2.47861	7.75959	8.25815	Enhancer
chr3	102234068	102234177	NFKBIZ	4.69398	2.87895	0.775765	Enhancer
chr4	26053219	26053409	RBPJ	1.54586	1.68207	2.51869	Enhancer
chr4	26074723	26075041	RBPJ	0.588413	2.00351	11.6803	Enhancer
chr4	26075555	26075748	RBPJ	0.87082	1.52149	7.46884	Enhancer
chr4	26076177	26076668	RBPJ	0.429361	3.83363	13.4221	Enhancer
chr4	26088573	26088887	RBPJ	0.778902	3.08959	5.18972	Enhancer
chr4	26142010	26142263	RBPJ	0.99526	2.37956	4.48717	Enhancer
chr4	26197478	26197739	RBPJ	1.19151	2.53913	3.99153	Enhancer
chr4	26218107	26218553	RBPJ	0.353927	3.10056	6.89887	Enhancer
chr4	26218860	26219232	RBPJ	0.358678	2.62985	4.38629	Enhancer
chr4	26239372	26239578	RBPJ	0.421924	0.947796	3.52114	Enhancer
chr4	26261428	26261823	RBPJ	0.560277	1.76534	4.49453	Enhancer
chr4	26273106	26273309	RBPJ	1.21475	3.8625	4.31999	Enhancer
chr4	26273647	26273930	RBPJ	2.58837	5.09693	8.97036	Enhancer
chr4	26275285	26275604	RBPJ	1.87096	3.59703	4.05574	Enhancer
chr4	26287882	26288026	RBPJ	1.21046	2.26602	6.16906	Enhancer
chr4	26302567	26302822	RBPJ	1.84845	4.05837	5.88234	Enhancer
chr4	26331067	26331201	RBPJ	6.18523	2.68992	2.66238	Enhancer
chr5	140245326	140245582	CD14	1.51789	3.69976	2.19411	Enhancer
chr5	140251492	140251912	CD14	2.87924	5.22476	2.58257	Enhancer
chr5	140342285	140342653	CD14	3.0275	4.82671	2.10588	Enhancer
chr5	140555927	140556104	CD14	2.71171	3.83163	8.09725	Enhancer
chr5	140569313	140569469	CD14	3.32929	5.30016	6.16619	Enhancer
chr5	140576512	140576648	CD14	1.61023	3.88713	5.53574	Enhancer
chr5	140576786	140576959	CD14	2.52796	4.48599	9.27707	Enhancer
chr5	140589197	140589557	CD14	1.18886	2.9285	10.1263	Enhancer
chr5	140595464	140595896	CD14	1.43982	5.59986	9.5306	Enhancer
chr5	140602957	140603222	CD14	1.26638	3.15335	6.56459	Enhancer
chr5	140608844	140608960	CD14	1.8733	5.84633	7.12618	Enhancer
chr5	140609189	140609588	CD14	2.72412	17.8393	15.4707	Enhancer
chr5	140611241	140611637	CD14	2.93156	9.85326	9.28728	Enhancer
chr5	140611941	140612341	CD14	9.18727	34.5281	31.2065	Enhancer
chr6	139323642	139324124	CITED2	2.57638	2.98672	1.83548	Enhancer
chr6	139839527	139839748	CITED2	0.533738	1.59313	3.8834	Enhancer
chr6	139841963	139842092	CITED2	0.373589	0.911969	2.98745	Enhancer
chr6	140039495	140039594	CITED2	0	0.165377	2.43803	Enhancer
chr8	55843910	55844779	LYN	3.88343	3.08509	9.51993	Enhancer
chr8	55845102	55845419	LYN	2.65935	2.00008	6.56405	Enhancer
chr8	55919654	55919854	LYN	3.61356	4.00815	3.60415	Enhancer
chr8	55972860	55972959	LYN	1.17042	1.83714	3.95266	Enhancer
chr8	55973135	55973325	LYN	1.29488	2.30541	6.49799	Enhancer
chr8	55975667	55975884	LYN	1.15355	1.99124	4.09706	Enhancer
chr8	56005515	56005614	LYN	1.2689	2.29677	4.29558	Enhancer
chr8	115056461	115056600	TRPS1	0.0025488	0.411398	2.59753	Enhancer
chr8	115427604	115428082	TRPS1	0.219224	1.12391	4.93002	Enhancer
chr8	115451493	115451636	TRPS1	1.35203	0.702033	3.41187	Enhancer
chr8	115451829	115451955	TRPS1	0.541218	0.493533	3.50411	Enhancer
chr8	115452190	115452374	TRPS1	1.32243	1.15718	3.55454	Enhancer
chr8	115576482	115576701	TRPS1	0.158323	0.328686	2.50341	Enhancer
chr8	125110907	125111073	TRIB1	1.00103	1.35691	2.50336	Enhancer
chr8	125191654	125192185	TRIB1	0.636853	1.65273	3.54757	Enhancer
chr8	125219287	125219594	TRIB1	0.695745	1.25057	4.00975	Enhancer
chr8	125219830	125220197	TRIB1	0.70447	1.22326	2.55936	Enhancer
chr8	125311460	125311747	TRIB1	0.606933	1.29645	3.71429	Enhancer
chr8	125341424	125341627	TRIB1	0.545447	1.40905	5.02503	Enhancer
chr8	125342204	125342653	TRIB1	0.952115	1.70952	7.70633	Enhancer
chr8	125343985	125344260	TRIB1	0.703599	1.16139	4.64739	Enhancer
chr8	125410997	125411105	TRIB1	1.06026	1.66492	2.74743	Enhancer
chr8	125440329	125440428	TRIB1	3.56198	4.66293	5.38746	Enhancer
chr8	125467022	125467376	TRIB1	0.978648	1.32495	3.25137	Enhancer
chr8	125499047	125499258	TRIB1	2.10786	2.6946	2.17991	Enhancer
chr8	125506164	125506403	TRIB1	1.04133	3.07929	4.04506	Enhancer
chr8	125512729	125513452	TRIB1	0.343829	5.16363	5.94182	Enhancer
chr8	125608067	125608212	TRIB1	1.26401	2.44624	2.61996	Enhancer
chr9	107612190	107612325	KLF4	0.444515	2.35485	3.52079	Enhancer
chr9	107615346	107615640	KLF4	0.437126	1.3258	3.39134	Enhancer
chr9	107638023	107638274	KLF4	0.87961	2.30519	6.09338	Enhancer
chr9	107645059	107645320	KLF4	1.06312	1.54643	4.01062	Enhancer
chr9	107675579	107675680	KLF4	0.229503	0.348712	2.87857	Enhancer
chr9	107749861	107750045	KLF4	0.0568339	0.191802	3.80124	Enhancer
chr9	107750720	107750983	KLF4	0.355016	0.650073	4.44229	Enhancer
chr9	107760936	107761228	KLF4	0.110971	1.05602	4.45703	Enhancer
chr9	107848596	107848895	KLF4	0.231096	0.632582	3.35594	Enhancer
chr9	107874721	107874871	KLF4	1.08544	1.34797	4.79719	Enhancer
chr9	108580005	108580266	KLF4	0.54257	1.03814	2.62574	Enhancer
chr10	3424547	3424805	KLF6	1.62267	2.36646	3.0752	Enhancer
chr10	3468224	3468543	KLF6	0.772835	2.46923	5.56864	Enhancer
chr10	3469141	3469443	KLF6	1.01166	2.19417	6.47326	Enhancer
chr10	3532732	3533000	KLF6	2.97662	2.57227	3.16357	Enhancer
chr10	3554142	3554347	KLF6	3.3606	2.52225	1.50179	Enhancer
chr10	3720501	3720917	KLF6	0.76037	2.88293	4.59011	Enhancer
chr10	3765127	3765439	KLF6	2.75272	3.54794	4.05775	Enhancer
chr10	3805249	3805537	KLF6	2.56139	4.72076	4.84084	Enhancer
chr10	3805881	3806079	KLF6	3.62694	4.72668	3.71409	Enhancer
chr10	3811558	3811689	KLF6	3.21221	3.27192	3.32899	Enhancer
chr10	3851220	3851872	KLF6	0.467274	1.66548	3.85447	Enhancer
chr10	3852620	3852787	KLF6	0.337209	1.98726	3.24341	Enhancer
chr10	4130772	4131067	KLF6	1.67317	4.78163	2.91907	Enhancer
chr10	4131652	4131798	KLF6	2.20462	3.3571	5.01927	Enhancer
chr10	4663151	4663389	KLF6	2.07241	2.40873	3.25441	Enhancer
chr10	4770809	4771038	KLF6	0.530936	1.51241	4.17193	Enhancer
chr10	68957032	68957302	SRGN	3.23935	2.74599	2.00317	Enhancer
chr10	69005686	69006066	SRGN	9.25198	14.549	18.0224	Enhancer
chr10	69006140	69006361	SRGN	8.61831	14.8999	19.502	Enhancer
chr10	69006936	69007036	SRGN	7.22196	11.9071	15.336	Enhancer
chr10	69013000	69013103	SRGN	3.21758	4.38415	5.8359	Enhancer
chr10	69045480	69045926	SRGN	2.06956	3.64235	9.17715	Enhancer
chr10	69046094	69046203	SRGN	2.51809	3.70986	4.82103	Enhancer
chr10	69049692	69049866	SRGN	1.62321	3.07884	8.00476	Enhancer
chr10	69052126	69052363	SRGN	1.49803	2.30489	6.17868	Enhancer
chr10	69061348	69061965	SRGN	4.41034	14.9151	20.8149	Enhancer
chr10	69065426	69066267	SRGN	3.21624	6.53361	7.27183	Enhancer
chr10	69072987	69073473	SRGN	2.12957	5.08969	4.80214	Enhancer
chr10	69073960	69074096	SRGN	1.5555	3.0939	1.94716	Enhancer
chr10	69101577	69101791	SRGN	3.16731	4.73418	6.71514	Enhancer
chr10	69101912	69102124	SRGN	3.28401	4.32542	8.06503	Enhancer
chr10	69124930	69125058	SRGN	2.74952	3.1608	5.68934	Enhancer
chr10	72223507	72224096	DDIT4	1.44602	2.70415	5.3002	Enhancer
chr10	72248487	72249079	DDIT4	8.3306	7.51255	3.78062	Enhancer
chr10	72260567	72260930	DDIT4	4.87723	4.1603	6.49144	Enhancer
chr10	72297124	72297611	DDIT4	13.2309	10.9047	13.181	Enhancer
chr10	72298021	72298280	DDIT4	7.78871	5.00641	8.40001	Enhancer
chr10	72308523	72308865	DDIT4	1.89975	4.36853	8.4214	Enhancer
chr10	72320689	72321107	DDIT4	11.3549	12.744	14.878	Enhancer
chr10	72335551	72335869	DDIT4	10.1715	10.645	17.5329	Enhancer
chr10	97217981	97218298	FRAT2	3.52433	2.66191	2.04863	Enhancer
chr10	97274918	97275076	FRAT2	6.21828	4.47432	5.9725	Enhancer
chr10	97277680	97277874	FRAT2	8.94336	7.99887	6.8186	Enhancer
chr10	97279493	97279607	FRAT2	3.85277	3.84065	5.32038	Enhancer
chr10	97308484	97308617	FRAT2	2.64638	3.38668	1.73543	Enhancer
chr10	97321438	97321746	FRAT2	11.8946	15.4007	17.4993	Enhancer
chr10	97365631	97366161	FRAT2	2.4873	4.74801	5.57317	Enhancer
chr10	97371838	97371945	FRAT2	3.52973	2.74173	2.01654	Enhancer
chr10	97376494	97376747	FRAT2	0.531781	2.61938	4.11598	Enhancer
chr10	97400139	97400257	FRAT2	1.43561	2.58489	3.16748	Enhancer
chr10	97406235	97406363	FRAT2	1.1273	2.68041	3.65022	Enhancer
chr11	33893711	33893905	LMO2	2.82503	5.14472	5.17823	Enhancer
chr11	33893959	33894199	LMO2	4.07168	2.74161	3.02713	Enhancer
chr11	33930383	33930662	LMO2	1.60946	4.41963	3.38929	Enhancer
chr11	59145667	59145842	MPEG	0.949789	1.79101	3.20047	Enhancer
chr11	59172840	59173444	MPEG	11.8856	10.0844	11.9565	Enhancer
chr11	59216601	59217187	MPEG	9.56348	12.5048	15.4842	Enhancer
chr11	59222548	59223045	MPEG	2.16703	4.01723	10.7926	Enhancer
chr11	59224399	59224536	MPEG	2.00233	2.4978	4.54812	Enhancer
chr11	59224673	59224953	MPEG	1.72155	2.50919	7.87413	Enhancer
chr11	59247553	59248221	MPEG	1.11424	4.25249	9.28494	Enhancer
chr11	59248931	59249090	MPEG	0.892746	2.20247	3.76311	Enhancer
chr11	59254376	59254655	MPEG	1.01136	2.76553	4.44621	Enhancer
chr11	59273400	59273811	MPEG	1.54623	2.87515	4.90164	Enhancer
chr11	59289497	59289644	MPEG	0.545389	1.3704	4.53766	Enhancer
chr15	50055444	50055991	ATP8B4	0.746246	3.09353	7.36827	Enhancer
chr15	50064780	50064928	ATP8B4	0.19539	1.7818	4.12372	Enhancer
chr15	50107624	50107984	ATP8B4	1.51146	2.89267	12.2576	Enhancer
chr15	50134549	50135010	ATP8B4	6.61851	10.5018	14.6124	Enhancer
chr16	31072587	31072745	ITGAX	0.870556	1.6788	2.62655	Enhancer
chr16	31113190	31113424	ITGAX	0.445557	1.73964	2.81371	Enhancer
chr16	31128736	31129165	ITGAX	0.714512	1.50454	3.23074	Enhancer
chr16	31236695	31236882	ITGAX	1.67006	2.22372	2.89214	Enhancer
chr16	31244039	31244351	ITGAX	0.716114	2.20626	3.4031	Enhancer
chr16	31253595	31254138	ITGAX	0.551953	2.56696	3.60892	Enhancer
chr16	31301838	31302379	ITGAX	1.78828	5.11013	11.3187	Enhancer
chr16	31352113	31352284	ITGAX	4.68888	5.74139	8.97387	Enhancer
chr16	31352534	31352680	ITGAX	6.04408	10.7584	12.6041	Enhancer
chr16	31366944	31367149	ITGAX	5.27423	7.48221	8.53806	Enhancer
chr16	31367848	31368270	ITGAX	3.70852	7.85879	15.1722	Enhancer
chr16	31869533	31869847	ITGAX	0.878971	1.42563	2.53929	Enhancer
chr16	85829451	85830081	IRF8	3.94752	11.0066	11.2855	Enhancer
chr16	85838485	85838710	IRF8	1.78213	3.22042	4.40872	Enhancer
chr16	85853503	85854352	IRF8	1.75776	6.4642	8.78827	Enhancer
chr16	85868462	85868810	IRF8	5.5782	4.61802	3.81335	Enhancer
chr16	85870180	85870481	IRF8	3.2121	4.984	7.95657	Enhancer
chr16	85870728	85870930	IRF8	2.13056	3.65889	7.05952	Enhancer
chr16	85888823	85889203	IRF8	8.89157	13.1052	14.5534	Enhancer
chr16	85915232	85915384	IRF8	3.19756	3.77867	4.49518	Enhancer
chr16	85927617	85927716	IRF8	1.96591	4.08865	2.1748	Enhancer
chr16	85928374	85928862	IRF8	2.62641	5.62544	6.63765	Enhancer
chr16	85936523	85936751	IRF8	2.29332	4.68995	3.62842	Enhancer
chr16	85972654	85972891	IRF8	3.99858	3.20072	4.42709	Enhancer
chr16	85978471	85978722	IRF8	1.19609	2.16674	4.21282	Enhancer
chr16	85982617	85982848	IRF8	2.22365	5.19514	7.15948	Enhancer
chr16	85984955	85985154	IRF8	1.79862	3.47474	5.83102	Enhancer
chr16	86018614	86018835	IRF8	1.30961	2.09404	5.47235	Enhancer
chr19	33332358	33332540	CEBPa	1.55024	2.39993	5.66468	Enhancer
chr20	23086764	23086877	CD93	41.1966	27.6919	19.8478	Enhancer
chr20	23103384	23103520	CD93	1.59029	4.56865	8.62655	Enhancer
chr20	23124574	23124746	CD93	2.05147	2.25526	7.09974	Enhancer
chr20	23142369	23142534	CD93	0.448077	1.62518	6.13161	Enhancer
chr20	23147370	23147565	CD93	0.333241	1.83351	5.45476	Enhancer
chr20	23147974	23148124	CD93	0.460965	2.01735	6.72338	Enhancer
chr20	23195755	23195888	CD93	0.609938	1.29375	3.4018	Enhancer
chr20	23225416	23225837	CD93	0.290143	2.57758	6.52933	Enhancer
chr20	23332101	23332223	CD93	0.779749	1.66216	3.26563	Enhancer
chr20	39909566	39909943	MAFB	0.291161	0.788175	2.721	Enhancer
chr20	40279372	40279661	MAFB	0.374342	0.935166	2.97614	Enhancer
chr20	40339940	40340610	MAFB	0.335454	0.934147	5.26126	Enhancer
chr20	40436800	40437129	MAFB	0.294802	1.00959	3.22664	Enhancer
chr20	40470670	40470862	MAFB	1.75399	1.18911	3.05329	Enhancer
chr20	40498118	40498817	MAFB	0.605023	3.18514	6.45256	Enhancer
chr20	40697696	40697809	MAFB	3.87917	3.86327	7.84744	Enhancer
chr20	40719368	40719713	MAFB	1.07408	4.35623	3.622	Enhancer
chr20	40961862	40962114	MAFB	0.955674	2.41061	3.3394	Enhancer
chr1	12125720	12126109	TNFRSF1B	0.791097	4.84797	13.3671	Promoter
chr2	27771575	27772033	FOSL2	2.53817	2.84915	2.76877	Promoter
chr2	27890372	27890711	FOSL2	2.82139	2.62461	3.73482	Promoter
chr2	27891142	27891343	FOSL2	2.34063	2.80123	3.68894	Promoter
chr2	28392785	28392929	FOSL2	18.1426	26.754	27.4226	Promoter
chr5	140401087	140401292	CD14	4.66022	5.3073	4.45284	Promoter
chr5	140564495	140564884	CD14	5.72375	5.60323	8.8622	Promoter
chr5	140647171	140648313	CD14	12.9202	11.2991	14.2646	Promoter
chr5	140664309	140665095	CD14	6.52011	7.20518	9.67566	Promoter
chr5	140700201	140700524	CD14	4.2104	2.97665	4.05353	Promoter
chr6	139134944	139135099	CITED2	2.53544	2.09458	1.59176	Promoter
chr8	125430159	125430473	TRIB1	42.0647	51.9188	51.2933	Promoter
chr10	68956577	68956745	SRGN	3.26375	2.43634	1.90636	Promoter
chr10	69088038	69088225	SRGN	13.2971	14.6742	17.8798	Promoter
chr10	69179586	69180340	SRGN	3.10234	3.55632	3.76086	Promoter
chr10	97318940	97319041	FRAT2	10.4112	9.69413	11.6147	Promoter
chr15	50114399	50114679	ATP8B4	2.13848	6.67378	15.7329	Promoter
chr16	31073213	31073351	ITGAX	0.829882	2.21782	2.85173	Promoter
chr16	31073745	31073853	ITGAX	1.26456	2.59323	3.09501	Promoter
chr16	31094710	31095088	ITGAX	0.62037	2.01481	2.7557	Promoter
chr16	31108242	31108440	ITGAX	0.884992	1.19339	2.44893	Promoter
chr16	31117984	31118128	ITGAX	1.10861	1.58736	2.5883	Promoter
chr16	31180064	31180215	ITGAX	1.7977	3.14342	4.99997	Promoter
chr16	31180638	31180848	ITGAX	0.892789	2.96239	4.17907	Promoter
chr16	31201811	31202436	ITGAX	2.52452	5.36962	7.17675	Promoter
chr16	31202703	31202825	ITGAX	1.7401	4.10248	6.32107	Promoter
chr16	31214468	31214612	ITGAX	1.43566	1.79387	2.41326	Promoter
chr16	31355085	31355232	ITGAX	12.6247	14.0036	24.8864	Promoter
chr16	85913825	85913968	IRF8	4.34109	3.77831	3.83133	Promoter
chr20	23086360	23086530	CD93	38.08	38.5678	34.9878	Promoter

## Sheet: Fig.2e
Figure 2e. Interaction frequencies of bCBS of iMac-specific genes.
chr	start	end	viewpoint	0h	24h	96h	annotation
chr1	11838729	11839062	TNFRSF1B	5.21776	6.01895	4.60154	CTCF
chr1	12001567	12001904	TNFRSF1B	2.54727	1.92851	2.85698	CTCF
chr1	12079658	12079901	TNFRSF1B	5.74315	3.45006	3.87849	CTCF
chr1	12087806	12088257	TNFRSF1B	3.93552	2.53972	2.41402	CTCF
chr1	12106929	12107079	TNFRSF1B	5.06708	6.1694	7.22149	CTCF
chr1	12124867	12125100	TNFRSF1B	41.2532	31.7441	38.6104	CTCF
chr1	12184235	12184698	TNFRSF1B	1.12026	2.94821	5.81564	CTCF
chr1	12196414	12197069	TNFRSF1B	4.31573	4.87636	9.80136	CTCF
chr1	12207970	12209532	TNFRSF1B	21.268	16.1781	19.9915	CTCF
chr1	12229838	12230114	TNFRSF1B	3.4504	4.32387	5.64213	CTCF
chr1	12243914	12244673	TNFRSF1B	5.96249	9.58982	18.7827	CTCF
chr1	12272185	12272343	TNFRSF1B	4.91047	5.17636	4.79841	CTCF
chr1	12275464	12275722	TNFRSF1B	2.48516	4.40175	5.93256	CTCF
chr1	12314373	12314705	TNFRSF1B	1.89609	2.79635	3.08655	CTCF
chr1	12619869	12620151	TNFRSF1B	3.83416	7.86827	7.07539	CTCF
chr1	12658873	12659439	TNFRSF1B	4.44922	7.53312	6.8325	CTCF
chr1	12921758	12922048	TNFRSF1B	1.90616	2.94801	3.62948	CTCF
chr1	167066606	167067018	CREG1	1.37699	3.21357	3.46805	CTCF
chr1	167267938	167268156	CREG1	3.01755	5.81569	9.08747	CTCF
chr1	167401301	167401777	CREG1	4.73411	6.86092	13.2502	CTCF
chr1	167442183	167442508	CREG1	4.21754	5.35499	7.39196	CTCF
chr1	167520949	167521087	CREG1	1.45632	2.18832	3.06441	CTCF
chr1	167533826	167534188	CREG1	4.50334	7.35739	10.2668	CTCF
chr1	167540421	167540714	CREG1	4.77068	5.71993	9.3059	CTCF
chr1	167553746	167553947	CREG1	5.09019	5.69249	6.70367	CTCF
chr1	167556070	167556626	CREG1	14.6342	14.7537	21.7552	CTCF
chr1	167599795	167600679	CREG1	64.5057	46.4095	42.7111	CTCF
chr1	167617227	167618062	CREG1	7.11015	6.32138	4.27263	CTCF
chr1	167630013	167630163	CREG1	5.09769	3.97944	4.36752	CTCF
chr1	167637452	167637613	CREG1	5.32232	3.97725	6.60516	CTCF
chr1	167715486	167715688	CREG1	5.64152	4.5189	5.85228	CTCF
chr1	167797101	167797371	CREG1	1.21739	3.21592	2.34319	CTCF
chr1	167803329	167803737	CREG1	7.86801	6.82628	6.7921	CTCF
chr1	168082244	168082542	CREG1	5.58857	4.86024	4.28598	CTCF
chr2	27683116	27683821	FOSL2	10.2394	12.8425	8.76487	CTCF
chr2	27703385	27704331	FOSL2	22.8695	19.3017	14.6425	CTCF
chr2	27723322	27723621	FOSL2	6.72489	8.13104	8.23691	CTCF
chr2	27754164	27754748	FOSL2	14.4281	16.4684	23.9461	CTCF
chr2	27807589	27807749	FOSL2	3.12056	1.99287	3.28664	CTCF
chr2	27954878	27955380	FOSL2	2.00973	3.5131	5.05101	CTCF
chr2	28155728	28156056	FOSL2	3.94498	2.86667	1.84874	CTCF
chr2	28396871	28397068	FOSL2	7.83088	8.1123	13.2116	CTCF
chr2	28413694	28413818	FOSL2	2.03153	2.30404	7.75447	CTCF
chr2	28419418	28419597	FOSL2	4.69027	4.37036	8.10306	CTCF
chr2	64049653	64050242	PELI1	9.10261	15.8682	18.3028	CTCF
chr2	64359961	64360347	PELI1	0.973154	1.11999	2.86642	CTCF
chr2	64457537	64457825	PELI1	3.29124	2.24188	4.06518	CTCF
chr2	64487848	64488486	PELI1	17.4442	17.0458	26.5066	CTCF
chr2	64522789	64523315	PELI1	6.70645	6.07236	10.5231	CTCF
chr2	64555731	64555884	PELI1	3.19761	2.45207	4.3084	CTCF
chr2	64561728	64562840	PELI1	8.56633	7.6474	14.2336	CTCF
chr2	64586826	64587231	PELI1	8.88724	8.47628	9.31006	CTCF
chr2	64625416	64625669	PELI1	3.64428	2.48061	1.08475	CTCF
chr2	64646417	64646655	PELI1	8.38976	6.70193	6.91642	CTCF
chr2	64655339	64655461	PELI1	3.60291	1.83388	1.84278	CTCF
chr2	64865255	64866244	PELI1	6.77255	7.38774	5.19639	CTCF
chr2	64873318	64873898	PELI1	13.6807	13.2365	10.7745	CTCF
chr2	64917642	64918117	PELI1	2.26738	2.59821	2.61966	CTCF
chr2	65033305	65033600	PELI1	3.26289	4.37333	2.32436	CTCF
chr2	65040567	65040957	PELI1	3.90194	4.10452	3.49746	CTCF
chr2	65573165	65573451	PELI1	5.8034	8.05434	4.17146	CTCF
chr2	69559674	69560253	MXD1	9.64576	8.07324	9.95885	CTCF
chr2	69565396	69565592	MXD1	3.18911	2.25998	3.23777	CTCF
chr2	69714735	69715042	MXD1	8.90997	8.22404	8.12503	CTCF
chr2	69741237	69741512	MXD1	5.55068	5.36964	8.99357	CTCF
chr2	69741994	69742179	MXD1	3.15598	3.65288	6.21074	CTCF
chr2	69766983	69767366	MXD1	3.15376	1.365	2.26055	CTCF
chr2	69789790	69790437	MXD1	2.6387	2.84348	4.85591	CTCF
chr2	69816431	69817663	MXD1	24.536	23.2327	32.4303	CTCF
chr2	69829419	69829763	MXD1	5.72284	5.06558	6.82067	CTCF
chr2	69902325	69902923	MXD1	3.55028	6.07844	8.4924	CTCF
chr2	69911951	69912306	MXD1	9.23639	10.4467	9.91572	CTCF
chr2	69914499	69914735	MXD1	2.5348	2.28191	5.51444	CTCF
chr2	70070855	70071355	MXD1	3.56488	3.49052	3.69769	CTCF
chr2	70142488	70143114	MXD1	5.41281	6.53658	6.55887	CTCF
chr2	70301232	70301717	MXD1	2.26414	3.81805	1.90235	CTCF
chr2	70301839	70302333	MXD1	4.0228	6.13694	3.11764	CTCF
chr2	70303951	70304152	MXD1	2.33779	3.37025	1.80591	CTCF
chr2	70647942	70648170	MXD1	2.35806	3.87921	1.23629	CTCF
chr3	45037765	45038039	CCR1	3.12958	4.11943	2.03753	CTCF
chr3	45040786	45040965	CCR1	2.09468	3.46044	1.55267	CTCF
chr3	45511576	45511774	CCR1	6.09156	7.74105	5.35598	CTCF
chr3	45656810	45657080	CCR1	2.32013	3.01519	3.0912	CTCF
chr3	45760986	45761159	CCR1	1.96928	2.63956	2.27537	CTCF
chr3	45761237	45761591	CCR1	4.80432	6.52506	5.35774	CTCF
chr3	45929108	45929363	CCR1	4.58658	5.38058	4.39083	CTCF
chr3	45938805	45939259	CCR1	24.8315	22.0736	23.3607	CTCF
chr3	46076726	46076932	CCR1	3.37006	4.72974	8.20736	CTCF
chr3	46078654	46079345	CCR1	16.9179	17.3573	21.5952	CTCF
chr3	46087759	46088246	CCR1	11.4533	15.1502	26.8586	CTCF
chr3	46100777	46101208	CCR1	0.500569	1.3609	4.21983	CTCF
chr3	46183323	46183669	CCR1	1.35042	1.51107	3.603	CTCF
chr3	46208131	46208873	CCR1	2.67255	6.36564	14.3201	CTCF
chr3	46214699	46215017	CCR1	4.20356	5.24358	11.0808	CTCF
chr3	46228803	46229350	CCR1	1.4852	3.24108	6.23654	CTCF
chr3	46276582	46276912	CCR1	6.85936	2.8359	1.43393	CTCF
chr3	46293398	46293636	CCR1	3.3182	1.92802	4.49953	CTCF
chr3	46368641	46368932	CCR1	7.1305	10.8194	19.3896	CTCF
chr3	46372585	46372781	CCR1	19.3448	19.6192	30.2812	CTCF
chr3	46394108	46394240	CCR1	2.443	3.54252	5.82769	CTCF
chr3	46427305	46427730	CCR1	3.00834	2.09273	5.08561	CTCF
chr3	46447222	46447561	CCR1	0.914159	1.58113	9.04074	CTCF
chr3	46488721	46489123	CCR1	4.40136	4.07313	4.70304	CTCF
chr3	46558101	46558650	CCR1	6.89425	6.90813	9.17635	CTCF
chr3	101677069	101677516	NFKBIZ	2.19844	3.49621	3.16108	CTCF
chr3	101693737	101693847	NFKBIZ	2.68452	3.07994	3.16331	CTCF
chr3	101695828	101696436	NFKBIZ	8.86042	8.40375	7.45235	CTCF
chr3	101803227	101803566	NFKBIZ	20.5511	18.6829	17.7251	CTCF
chr3	101809278	101809900	NFKBIZ	26.7586	29.096	30.5832	CTCF
chr3	101813776	101814358	NFKBIZ	28.3139	37.7522	45.6799	CTCF
chr3	101827824	101828130	NFKBIZ	3.8821	4.95087	5.32185	CTCF
chr3	101848981	101849100	NFKBIZ	2.08064	5.17202	7.34022	CTCF
chr3	101849847	101850004	NFKBIZ	2.39551	4.89864	3.83194	CTCF
chr3	102229174	102229293	NFKBIZ	42.9478	38.9761	28.81	CTCF
chr3	102536534	102536778	NFKBIZ	7.75079	6.66277	6.67131	CTCF
chr3	172332517	172332892	TNFSF10	10.8436	11.2193	6.44935	CTCF
chr3	172341544	172342004	TNFSF10	4.55174	7.45074	5.48595	CTCF
chr3	172461648	172461866	TNFSF10	3.88406	4.69252	3.60964	CTCF
chr3	172477200	172477882	TNFSF10	6.56917	8.19456	7.35225	CTCF
chr3	172489159	172489354	TNFSF10	9.7193	12.0434	8.69021	CTCF
chr3	172489441	172490647	TNFSF10	36.12	39.6145	34.105	CTCF
chr3	172546496	172547193	TNFSF10	1.2486	5.25477	19.8157	CTCF
chr3	172578052	172578463	TNFSF10	2.18557	3.69052	5.30087	CTCF
chr3	172623348	172623475	TNFSF10	3.16147	3.75514	4.3513	CTCF
chr3	172666249	172666577	TNFSF10	1.42149	2.0116	5.62438	CTCF
chr3	172666705	172667163	TNFSF10	3.40366	5.00139	7.74925	CTCF
chr3	172675635	172675884	TNFSF10	2.36259	2.83031	3.93326	CTCF
chr3	172710833	172711358	TNFSF10	3.23729	2.63731	5.02237	CTCF
chr4	25440036	25440201	RBPJ	3.41715	3.52066	2.60846	CTCF
chr4	25441626	25441896	RBPJ	2.49539	2.94739	2.79109	CTCF
chr4	25842271	25842645	RBPJ	2.53071	2.82307	3.61701	CTCF
chr4	25857496	25857718	RBPJ	2.12845	3.4948	3.62278	CTCF
chr4	25925869	25926223	RBPJ	3.42665	3.78228	8.41202	CTCF
chr4	25988204	25988547	RBPJ	3.14599	3.66926	8.67755	CTCF
chr4	25993853	25993971	RBPJ	3.1325	1.69436	1.86618	CTCF
chr4	26020184	26020429	RBPJ	2.91324	2.84119	5.55172	CTCF
chr4	26061366	26061522	RBPJ	3.56106	3.72637	5.35673	CTCF
chr4	26081878	26082262	RBPJ	3.82613	3.64487	5.24984	CTCF
chr4	26150805	26151388	RBPJ	0.632901	1.46503	7.76369	CTCF
chr4	26161132	26161279	RBPJ	0.944669	0.846826	2.9591	CTCF
chr4	26161488	26161701	RBPJ	2.24073	2.58122	5.22878	CTCF
chr4	26179120	26179445	RBPJ	0.67982	0.794924	2.65572	CTCF
chr4	26288325	26288967	RBPJ	0.486404	1.54721	4.05108	CTCF
chr4	26319542	26319819	RBPJ	3.99192	5.78425	14.3314	CTCF
chr4	26325229	26325492	RBPJ	10.3737	13.3514	19.1216	CTCF
chr4	26330292	26330504	RBPJ	5.77376	6.23394	8.19679	CTCF
chr4	26410498	26411034	RBPJ	21.8884	21.9791	23.9073	CTCF
chr4	26458175	26458511	RBPJ	4.00135	4.07104	2.43639	CTCF
chr4	26459285	26459504	RBPJ	3.62043	5.32767	3.62842	CTCF
chr4	26719592	26720227	RBPJ	6.14498	6.84624	7.82549	CTCF
chr4	27010402	27010648	RBPJ	9.30973	11.7084	10.5379	CTCF
chr4	27318806	27319045	RBPJ	5.19333	2.89491	1.8546	CTCF
chr4	39469376	39469753	RBM47	3.71304	4.45647	1.6056	CTCF
chr4	39976504	39976677	RBM47	2.72568	3.27701	1.94709	CTCF
chr4	40056179	40056629	RBM47	2.09456	3.42822	2.79366	CTCF
chr4	40056730	40057026	RBM47	7.3745	9.59024	7.10289	CTCF
chr4	40149928	40150429	RBM47	15.5113	20.2082	20.631	CTCF
chr4	40229111	40229265	RBM47	1.04659	2.536	3.80709	CTCF
chr4	40284044	40284383	RBM47	1.5866	3.91203	5.73346	CTCF
chr4	40300057	40300228	RBM47	4.69905	4.66062	2.52526	CTCF
chr4	40309189	40309698	RBM47	6.14224	11.5794	10.5065	CTCF
chr4	40316831	40317541	RBM47	3.09541	5.64626	6.82117	CTCF
chr4	40325462	40325731	RBM47	8.51981	11.2936	11.979	CTCF
chr4	40508059	40508503	RBM47	2.97333	11.9204	12.0207	CTCF
chr4	40550921	40551471	RBM47	4.39209	6.51559	10.7924	CTCF
chr4	40606530	40606709	RBM47	0.312784	1.46992	2.67017	CTCF
chr4	40629829	40630023	RBM47	0.495437	1.19338	3.30011	CTCF
chr4	40735235	40735477	RBM47	2.14778	2.89088	10.4503	CTCF
chr4	40737031	40737150	RBM47	6.08908	3.86456	4.02213	CTCF
chr5	140239960	140240168	CD14	10.551	5.62955	2.87467	CTCF
chr5	140244540	140244788	CD14	7.43562	7.33973	3.29741	CTCF
chr5	140346771	140346908	CD14	1.8824	3.525	1.25701	CTCF
chr5	140351851	140351985	CD14	2.17783	2.6436	1.06488	CTCF
chr5	140357690	140358016	CD14	3.99869	4.83368	2.39452	CTCF
chr5	140363229	140363495	CD14	7.44056	8.6386	3.72134	CTCF
chr5	140372911	140373561	CD14	9.47186	9.76333	4.01225	CTCF
chr5	140400640	140400776	CD14	2.2841	2.80652	1.94568	CTCF
chr5	140401421	140401967	CD14	2.76521	3.44179	2.22512	CTCF
chr5	140547395	140548569	CD14	8.38092	20.7303	26.2899	CTCF
chr5	140557351	140557842	CD14	5.25362	10.6839	21.493	CTCF
chr5	140575406	140575836	CD14	3.92565	15.2699	48.9597	CTCF
chr5	140633201	140633720	CD14	25.8081	24.5723	26.477	CTCF
chr5	140639041	140639354	CD14	23.6469	34.008	42.6499	CTCF
chr5	140691042	140691730	CD14	1.59792	2.22579	2.70241	CTCF
chr5	140720255	140720489	CD14	1.39427	2.71858	2.97105	CTCF
chr5	141041175	141041449	CD14	2.31398	2.30673	2.67759	CTCF
chr6	138816132	138816372	CITED2	1.39375	1.3784	3.2063	CTCF
chr6	139124952	139125219	CITED2	2.23211	3.01926	5.26908	CTCF
chr6	139219257	139219687	CITED2	2.36058	3.85091	10.2443	CTCF
chr6	139364499	139364704	CITED2	3.0662	4.85687	9.94587	CTCF
chr6	139369553	139370012	CITED2	7.50879	10.6881	21.602	CTCF
chr6	139373244	139373362	CITED2	5.03071	6.21761	17.3209	CTCF
chr6	139375382	139375974	CITED2	3.33539	6.07945	13.7004	CTCF
chr6	139881734	139882052	CITED2	3.20637	3.46248	8.92585	CTCF
chr6	140052870	140053077	CITED2	0.599235	0.320356	3.73463	CTCF
chr6	140921673	140921897	CITED2	2.33915	3.59597	12.3058	CTCF
chr6	141562330	141563139	CITED2	1.83762	2.54726	6.17497	CTCF
chr7	139500039	139500308	KDM7A	3.54338	4.61856	3.54898	CTCF
chr7	139602239	139602471	KDM7A	3.22132	3.43608	4.44085	CTCF
chr7	139618919	139619166	KDM7A	4.10465	4.01933	4.20734	CTCF
chr7	139645978	139646264	KDM7A	3.92746	3.50913	3.4983	CTCF
chr7	139775897	139776129	KDM7A	3.80615	3.70782	2.87133	CTCF
chr7	140002373	140002626	KDM7A	6.27484	10.6215	8.09525	CTCF
chr7	140003706	140004484	KDM7A	6.48409	10.3666	8.49174	CTCF
chr7	140062836	140063151	KDM7A	3.11355	3.6841	2.98928	CTCF
chr7	140079059	140079459	KDM7A	4.26574	8.88972	9.53626	CTCF
chr7	140174982	140175755	KDM7A	29.5131	26.9217	27.3955	CTCF
chr7	140239580	140239893	KDM7A	0.801851	2.12109	6.65727	CTCF
chr7	140252789	140253662	KDM7A	3.42255	5.6301	9.87651	CTCF
chr7	140304326	140304872	KDM7A	3.13454	5.92223	11.348	CTCF
chr7	140343088	140343414	KDM7A	5.85956	9.87243	12.6826	CTCF
chr7	140349300	140349505	KDM7A	6.08127	3.04405	1.54745	CTCF
chr7	140493127	140493350	KDM7A	2.65263	2.93131	1.7956	CTCF
chr7	140653370	140653703	KDM7A	3.48337	3.29838	2.32132	CTCF
chr8	54169397	54169639	LYN	0.66754	1.31322	2.76256	CTCF
chr8	54632877	54633137	LYN	4.58038	3.31616	4.15742	CTCF
chr8	54758859	54759100	LYN	3.71141	3.48327	6.28493	CTCF
chr8	55313322	55313903	LYN	5.44409	5.5997	6.69824	CTCF
chr8	55579862	55580056	LYN	2.03887	2.04337	2.82299	CTCF
chr8	55880517	55880967	LYN	2.81772	4.00927	8.48414	CTCF
chr8	55881526	55881717	LYN	4.40661	5.23998	12.49	CTCF
chr8	55885517	55886054	LYN	3.52656	4.76078	6.16766	CTCF
chr8	55930419	55930947	LYN	1.19069	3.05306	8.59388	CTCF
chr8	55972269	55972381	LYN	2.2718	1.99413	4.23622	CTCF
chr8	55991148	55991472	LYN	1.19721	2.38791	5.11415	CTCF
chr8	56006517	56006844	LYN	3.01172	3.64231	4.63135	CTCF
chr8	56010651	56010941	LYN	10.062	8.41635	11.614	CTCF
chr8	56028182	56029303	LYN	20.5882	17.9665	16.4576	CTCF
chr8	56060121	56060509	LYN	11.3879	12.0182	12.3697	CTCF
chr8	56074344	56074869	LYN	4.9737	6.29043	5.26747	CTCF
chr8	56079058	56079541	LYN	9.67388	8.2938	7.45469	CTCF
chr8	56093510	56094045	LYN	3.87061	4.60007	5.80281	CTCF
chr8	56189042	56189580	LYN	12.0824	11.5828	12.5052	CTCF
chr8	56202305	56202648	LYN	5.33134	5.03071	5.69139	CTCF
chr8	56241743	56242278	LYN	3.68199	7.41817	9.44617	CTCF
chr8	114846727	114846928	TRPS1	1.9764	3.19712	4.13965	CTCF
chr8	115076829	115076944	TRPS1	0.829097	1.1408	3.84409	CTCF
chr8	115536975	115537101	TRPS1	0.22695	1.27134	3.00111	CTCF
chr8	115658264	115658547	TRPS1	1.64878	2.80389	6.05971	CTCF
chr8	115668869	115669052	TRPS1	1.75124	1.94124	4.53859	CTCF
chr8	115992763	115992966	TRPS1	0.396346	1.64056	2.74809	CTCF
chr8	116354330	116354742	TRPS1	1.0652	2.03969	5.214	CTCF
chr8	116447714	116448145	TRPS1	4.48989	5.26649	9.44271	CTCF
chr8	116715777	116715925	TRPS1	3.81078	4.20145	5.80202	CTCF
chr8	117037983	117038146	TRPS1	4.76583	4.08127	2.82596	CTCF
chr8	117044789	117044955	TRPS1	4.36836	4.24717	3.5135	CTCF
chr8	117304145	117304382	TRPS1	2.96248	1.9072	1.71399	CTCF
chr8	124592993	124593285	TRIB1	3.35597	3.97665	1.28926	CTCF
chr8	125118391	125119671	TRIB1	22.2329	24.2941	29.1467	CTCF
chr8	125230551	125231079	TRIB1	8.29809	6.97118	2.60694	CTCF
chr8	125431947	125432046	TRIB1	5.62805	9.35383	8.3154	CTCF
chr8	125432113	125432306	TRIB1	15.459	19.5803	22.351	CTCF
chr8	125432437	125432541	TRIB1	5.12918	9.046	12.3581	CTCF
chr8	125505486	125506437	TRIB1	1.39134	3.48543	7.19352	CTCF
chr8	125516724	125516851	TRIB1	1.23312	1.68428	4.67096	CTCF
chr8	125696739	125697057	TRIB1	4.81085	6.24063	8.37374	CTCF
chr8	125700681	125700932	TRIB1	3.88767	5.78768	9.00454	CTCF
chr8	125702667	125702766	TRIB1	3.92663	3.27096	3.61854	CTCF
chr9	105842164	105842301	KLF4	2.0806	1.17845	3.00827	CTCF
chr9	107422286	107422482	KLF4	3.91084	4.13406	7.7468	CTCF
chr9	107484239	107484400	KLF4	15.1736	11.565	15.716	CTCF
chr9	107487641	107487769	KLF4	2.36138	2.45702	4.29393	CTCF
chr9	107866771	107867178	KLF4	1.19957	2.09742	4.4771	CTCF
chr9	108272560	108272837	KLF4	1.43065	3.06406	9.27953	CTCF
chr9	108535657	108535813	KLF4	4.61648	2.08615	3.60034	CTCF
chr9	108565635	108566095	KLF4	8.12261	8.98252	16.1085	CTCF
chr9	108671169	108671490	KLF4	6.43812	8.3331	13.3966	CTCF
chr9	108761661	108762146	KLF4	8.31117	9.10899	17.1998	CTCF
chr9	108813714	108814288	KLF4	3.06744	8.77575	18.3988	CTCF
chr9	108850397	108850546	KLF4	1.74563	2.19316	3.81335	CTCF
chr9	108933969	108934174	KLF4	2.53452	2.11835	4.11681	CTCF
chr9	108954094	108954252	KLF4	4.84768	6.76284	7.82669	CTCF
chr10	3120170	3120360	KLF6	2.81979	1.42731	1.29011	CTCF
chr10	3192958	3193139	KLF6	17.2607	11.9721	13.515	CTCF
chr10	3197251	3198087	KLF6	13.0625	12.9589	15.2845	CTCF
chr10	3239250	3240039	KLF6	24.1306	20.5354	24.8547	CTCF
chr10	3394448	3395024	KLF6	4.3894	3.67084	6.32334	CTCF
chr10	3452438	3452631	KLF6	0.811314	1.36532	2.78064	CTCF
chr10	3455559	3455729	KLF6	2.262	2.1308	4.63027	CTCF
chr10	3781484	3781643	KLF6	2.28464	4.80306	9.13868	CTCF
chr10	4174245	4174490	KLF6	1.9332	2.5906	4.37001	CTCF
chr10	4344478	4344988	KLF6	0.339299	1.03938	3.77205	CTCF
chr10	4391799	4391953	KLF6	1.51798	1.67789	3.78763	CTCF
chr10	4512900	4513211	KLF6	5.39348	5.35925	8.50425	CTCF
chr10	4656632	4656971	KLF6	6.6103	8.03592	12.1824	CTCF
chr10	4815378	4816048	KLF6	2.00173	1.51697	3.02635	CTCF
chr10	68955749	68956247	SRGN	2.15139	2.82751	2.74279	CTCF
chr10	68981187	68981316	SRGN	2.22859	2.66221	3.14491	CTCF
chr10	68988537	68989162	SRGN	6.05188	6.3726	7.43205	CTCF
chr10	69007315	69007528	SRGN	18.5059	22.2618	26.7477	CTCF
chr10	69057306	69057561	SRGN	1.3795	5.75721	6.60855	CTCF
chr10	69093006	69093630	SRGN	70.0962	46.9785	53.0296	CTCF
chr10	69123195	69124266	SRGN	18.2415	32.9029	43.3489	CTCF
chr10	69222136	69223004	SRGN	6.31103	10.3108	8.87773	CTCF
chr10	69237372	69237979	SRGN	5.07576	8.80539	5.92744	CTCF
chr10	69392250	69392891	SRGN	12.3792	15.2478	9.92949	CTCF
chr10	69407847	69408113	SRGN	4.17051	4.85903	2.46036	CTCF
chr10	69408614	69408766	SRGN	2.10778	4.50166	3.17035	CTCF
chr10	69413145	69413568	SRGN	4.31979	4.92519	4.70025	CTCF
chr10	69507856	69508143	SRGN	5.76401	6.14293	3.42589	CTCF
chr10	71314366	71314658	DDIT4	3.22485	4.38719	4.38938	CTCF
chr10	71896482	71897103	DDIT4	8.00373	10.2962	9.872	CTCF
chr10	71956179	71956463	DDIT4	6.63117	7.48691	6.07944	CTCF
chr10	72048530	72048965	DDIT4	17.5544	18.9568	19.6375	CTCF
chr10	72061621	72061726	DDIT4	3.68236	2.06243	2.39986	CTCF
chr10	72126242	72126582	DDIT4	14.4646	11.6536	13.2012	CTCF
chr10	72132458	72132712	DDIT4	11.8394	7.08599	12.2921	CTCF
chr10	72215864	72216126	DDIT4	2.99047	2.52587	3.91913	CTCF
chr10	72222861	72223097	DDIT4	7.95072	7.40653	7.21208	CTCF
chr10	72244160	72244273	DDIT4	5.76532	2.2144	3.46724	CTCF
chr10	72255092	72255443	DDIT4	6.17489	7.31709	10.3767	CTCF
chr10	72274798	72275063	DDIT4	6.95523	5.41416	17.9512	CTCF
chr10	72275077	72275186	DDIT4	4.21728	1.85014	5.16365	CTCF
chr10	72328049	72328617	DDIT4	6.83963	9.04395	12.6438	CTCF
chr10	72337274	72337431	DDIT4	37.8826	34.1039	35.756	CTCF
chr10	72354876	72355143	DDIT4	7.58401	7.21291	7.07776	CTCF
chr10	72364320	72364654	DDIT4	3.4888	4.56844	4.34557	CTCF
chr10	72834293	72834522	DDIT4	9.25374	11.4082	17.5292	CTCF
chr10	72875346	72875529	DDIT4	5.07041	3.87265	4.49321	CTCF
chr10	73061073	73061363	DDIT4	3.42637	4.62748	3.37268	CTCF
chr10	96375321	96375614	FRAT2	2.83698	6.08759	7.09049	CTCF
chr10	97037401	97037614	FRAT2	4.06991	4.07464	4.55411	CTCF
chr10	97072951	97073146	FRAT2	24.6738	17.6554	22.1364	CTCF
chr10	97100905	97101121	FRAT2	8.82359	2.93715	2.40886	CTCF
chr10	97101309	97101598	FRAT2	6.75479	4.24516	3.3177	CTCF
chr10	97117376	97117742	FRAT2	12.6292	8.21338	9.053	CTCF
chr10	97129860	97130127	FRAT2	3.40527	5.96033	3.58834	CTCF
chr10	97131332	97131662	FRAT2	7.08776	4.29554	2.46303	CTCF
chr10	97179898	97180208	FRAT2	15.0722	12.9988	11.2486	CTCF
chr10	97196372	97196872	FRAT2	10.3093	11.6872	15.4703	CTCF
chr10	97210251	97211177	FRAT2	21.137	18.8584	21.0825	CTCF
chr10	97234450	97234899	FRAT2	14.1277	10.675	22.4795	CTCF
chr10	97355515	97356187	FRAT2	5.21916	7.19894	9.65225	CTCF
chr10	97356559	97356826	FRAT2	2.36119	3.19088	4.66458	CTCF
chr10	97612481	97612724	FRAT2	2.01864	3.22044	2.03121	CTCF
chr11	33808328	33808651	LMO2	8.53083	8.12823	8.17016	CTCF
chr11	33829598	33829796	LMO2	3.88552	3.17427	3.52213	CTCF
chr11	33835581	33835838	LMO2	5.81019	5.75907	7.05838	CTCF
chr11	33942899	33943221	LMO2	1.49776	1.58915	4.42649	CTCF
chr11	33970639	33971733	LMO2	47.5531	42.7135	37.4263	CTCF
chr11	33984658	33985089	LMO2	11.0468	16.6929	23.2773	CTCF
chr11	33987734	33988330	LMO2	10.6134	13.0353	21.223	CTCF
chr11	33997055	33997334	LMO2	9.96773	8.53634	7.9571	CTCF
chr11	34051392	34051523	LMO2	3.4062	2.65315	2.15378	CTCF
chr11	34105255	34105765	LMO2	4.13556	3.28815	2.64123	CTCF
chr11	34174387	34174595	LMO2	3.12702	2.78092	1.98435	CTCF
chr11	34359062	34359746	LMO2	5.69367	4.95223	3.10269	CTCF
chr11	58577140	58577269	MPEG	1.85644	1.99582	2.94202	CTCF
chr11	58654072	58654402	MPEG	4.27852	4.36423	5.10088	CTCF
chr11	58675583	58675836	MPEG	1.6018	2.32486	3.17559	CTCF
chr11	59053396	59053614	MPEG	2.62823	2.80851	2.4343	CTCF
chr11	59058483	59058728	MPEG	0.775145	1.16191	3.09674	CTCF
chr11	59097188	59097442	MPEG	3.30769	4.02688	5.51789	CTCF
chr11	59135876	59136452	MPEG	3.52666	4.83427	4.7808	CTCF
chr11	59142139	59142934	MPEG	4.61027	5.86213	7.38069	CTCF
chr11	59144642	59144833	MPEG	2.4133	2.80815	3.6249	CTCF
chr11	59158382	59158832	MPEG	6.97166	8.48261	10.8074	CTCF
chr11	59171019	59172350	MPEG	31.0324	35.5303	51.9574	CTCF
chr11	59200253	59200577	MPEG	2.53862	2.45701	3.73127	CTCF
chr11	59206650	59207019	MPEG	18.391	13.7893	14.4621	CTCF
chr11	59207575	59208300	MPEG	12.0085	9.51196	10.3263	CTCF
chr11	59263125	59263715	MPEG	13.7792	7.8106	11.1499	CTCF
chr11	59267223	59267509	MPEG	7.98026	4.04323	5.56758	CTCF
chr11	59284135	59285071	MPEG	8.24177	9.24173	14.3411	CTCF
chr11	59537182	59537472	MPEG	2.33778	2.43334	4.00997	CTCF
chr11	59680543	59680909	MPEG	5.73134	7.21507	8.6334	CTCF
chr11	59802440	59802877	MPEG	2.8392	2.42872	1.75509	CTCF
chr11	117426292	117426541	IL10RA	5.79078	4.96232	4.05426	CTCF
chr11	117807508	117807887	IL10RA	14.0032	13.9756	7.029	CTCF
chr11	117809303	117809593	IL10RA	7.54686	8.65943	6.41147	CTCF
chr11	117817822	117818038	IL10RA	22.9038	19.773	17.8593	CTCF
chr11	117819049	117819526	IL10RA	38.2743	37.4085	37.9757	CTCF
chr11	117822070	117822368	IL10RA	21.3715	22.6596	32.4861	CTCF
chr11	117823174	117823967	IL10RA	15.1729	15.7033	24.0268	CTCF
chr11	117843715	117844435	IL10RA	22.212	19.609	21.8811	CTCF
chr11	117904536	117904877	IL10RA	7.16061	7.16572	13.7661	CTCF
chr11	117928925	117929075	IL10RA	4.58202	4.35996	5.59219	CTCF
chr11	117945567	117945669	IL10RA	10.6804	8.27314	8.07357	CTCF
chr11	117946785	117947370	IL10RA	17.7304	22.9652	29.7674	CTCF
chr11	117950224	117950741	IL10RA	33.2152	32.5242	29.2691	CTCF
chr11	117979795	117980150	IL10RA	1.16363	1.65081	6.25652	CTCF
chr11	117985971	117986603	IL10RA	1.81826	2.10716	6.6263	CTCF
chr11	118145338	118145607	IL10RA	1.94116	3.07427	3.74455	CTCF
chr11	118171279	118171997	IL10RA	2.38152	2.8549	3.77444	CTCF
chr11	118290970	118291316	IL10RA	1.01975	1.34515	3.23156	CTCF
chr12	6944623	6944955	CD163	1.47	3.57128	1.9407	CTCF
chr12	7142105	7142479	CD163	4.38827	4.68693	4.73908	CTCF
chr12	7144478	7144709	CD163	3.20959	3.0404	2.97297	CTCF
chr12	7188611	7188753	CD163	3.26208	2.45011	4.21198	CTCF
chr12	7319988	7320203	CD163	2.14739	1.77499	3.48981	CTCF
chr12	7374631	7374969	CD163	1.94553	2.28543	5.24207	CTCF
chr12	7387420	7387574	CD163	5.64042	3.93579	2.47373	CTCF
chr12	7459762	7461455	CD163	22.7949	20.1025	21.1025	CTCF
chr12	7588737	7589126	CD163	3.07875	4.29835	7.6427	CTCF
chr12	7618327	7618519	CD163	1.89751	2.699	5.09773	CTCF
chr12	7638112	7639026	CD163	28.9432	31.6379	45.3642	CTCF
chr12	7645404	7645679	CD163	6.79572	6.75142	11.9028	CTCF
chr12	7667160	7667602	CD163	3.74217	5.28731	13.3489	CTCF
chr12	7677359	7677713	CD163	2.49163	2.83458	4.77283	CTCF
chr12	7716432	7716715	CD163	0.881555	1.49714	3.00219	CTCF
chr12	7806775	7807405	CD163	7.38916	8.62254	12.9016	CTCF
chr12	7859951	7860219	CD163	2.10446	2.27543	3.22035	CTCF
chr12	7995262	7995589	CD163	2.31363	1.81808	2.81525	CTCF
chr12	14845394	14845593	EPS8	1.86237	2.68433	2.72374	CTCF
chr12	15268983	15269211	EPS8	3.02814	3.47477	3.64146	CTCF
chr12	15276189	15276451	EPS8	2.88339	3.70828	3.90289	CTCF
chr12	15522695	15522871	EPS8	3.45452	4.00439	4.35155	CTCF
chr12	15532434	15532731	EPS8	2.42883	6.82676	17.5628	CTCF
chr12	15772509	15772677	EPS8	2.55073	3.55515	3.95915	CTCF
chr12	15789274	15789837	EPS8	2.39195	2.7076	4.26233	CTCF
chr12	15855996	15856769	EPS8	26.1458	32.0344	56.9091	CTCF
chr12	15899102	15899823	EPS8	11.3296	13.1306	13.3242	CTCF
chr15	48285852	48286011	ATP8B4	1.12116	2.09751	3.02845	CTCF
chr15	48337044	48337238	ATP8B4	2.33965	2.66059	1.72724	CTCF
chr15	48352559	48352736	ATP8B4	4.19588	3.34588	4.28762	CTCF
chr15	48358212	48358635	ATP8B4	5.52788	5.18974	6.14056	CTCF
chr15	48801176	48801351	ATP8B4	1.75451	1.30924	3.43093	CTCF
chr15	48861814	48862156	ATP8B4	20.4114	19.8283	23.3629	CTCF
chr15	48862266	48862419	ATP8B4	4.62306	4.28298	4.87741	CTCF
chr15	49146101	49146288	ATP8B4	3.90356	3.21166	6.10349	CTCF
chr15	49235497	49236141	ATP8B4	21.994	20.6109	27.7284	CTCF
chr15	49370881	49371089	ATP8B4	4.63164	3.96208	5.66886	CTCF
chr15	49421931	49422315	ATP8B4	2.36897	1.99047	3.01139	CTCF
chr15	49471363	49471506	ATP8B4	2.53243	2.98826	4.88254	CTCF
chr15	49620714	49621115	ATP8B4	1.16826	1.62598	2.94786	CTCF
chr15	49876882	49876981	ATP8B4	0.555992	0.986958	3.14479	CTCF
chr15	49902421	49902594	ATP8B4	1.14235	2.39682	4.34406	CTCF
chr15	50003754	50004057	ATP8B4	8.63399	7.73963	7.52157	CTCF
chr15	50051888	50052183	ATP8B4	1.84923	4.77564	6.7491	CTCF
chr15	50116578	50116760	ATP8B4	0.844598	1.7723	10.1581	CTCF
chr15	50128355	50128665	ATP8B4	1.72633	1.9978	4.08358	CTCF
chr15	50316036	50316388	ATP8B4	9.33758	6.1752	8.79982	CTCF
chr16	30935263	30935390	ITGAX	0.536084	1.77215	3.10196	CTCF
chr16	30984911	30985318	ITGAX	2.58154	4.93742	4.84782	CTCF
chr16	31074203	31074481	ITGAX	2.89374	2.80187	3.04461	CTCF
chr16	31095942	31096065	ITGAX	1.32902	1.99314	4.02131	CTCF
chr16	31159796	31159898	ITGAX	2.44449	2.02202	2.85677	CTCF
chr16	31200871	31201106	ITGAX	3.38607	3.66754	5.80507	CTCF
chr16	31259779	31260057	ITGAX	1.3713	1.81381	3.20414	CTCF
chr16	31299106	31299248	ITGAX	1.67629	3.6081	3.66252	CTCF
chr16	31333800	31333955	ITGAX	2.60922	3.31134	3.98301	CTCF
chr16	31357875	31358092	ITGAX	0.871371	1.93309	3.35994	CTCF
chr16	31382613	31382865	ITGAX	2.50332	3.14312	6.13731	CTCF
chr16	31443035	31443324	ITGAX	16.0974	16.1312	20.6984	CTCF
chr16	31459324	31459486	ITGAX	14.567	11.3337	13.8295	CTCF
chr16	31508368	31508483	ITGAX	3.03215	2.5199	3.5537	CTCF
chr16	31568962	31569073	ITGAX	2.51266	2.7883	3.6244	CTCF
chr16	31696892	31697212	ITGAX	10.5667	8.89764	12.5586	CTCF
chr16	31868714	31868882	ITGAX	5.66992	7.34562	7.75343	CTCF
chr16	85659747	85660158	IRF8	4.38856	6.35286	5.22067	CTCF
chr16	85675379	85676029	IRF8	3.82127	7.17754	7.23347	CTCF
chr16	85717927	85718193	IRF8	3.03858	4.23324	4.03158	CTCF
chr16	85718754	85719064	IRF8	1.72286	2.79349	2.38423	CTCF
chr16	85799488	85799711	IRF8	4.37904	4.35405	3.65505	CTCF
chr16	85819220	85819544	IRF8	56.3519	50.9216	52.6854	CTCF
chr16	85821018	85822284	IRF8	45.8774	47.4165	46.294	CTCF
chr16	85826564	85826721	IRF8	11.9302	15.265	11.8508	CTCF
chr16	85832571	85832932	IRF8	5.92593	5.73311	4.99865	CTCF
chr16	85847805	85848084	IRF8	1.78452	2.81952	3.71971	CTCF
chr16	85859849	85859995	IRF8	1.00684	1.62748	4.19571	CTCF
chr16	85862988	85863107	IRF8	1.23305	2.84591	3.01337	CTCF
chr16	85894393	85894714	IRF8	4.62755	4.57957	10.227	CTCF
chr16	85897445	85897726	IRF8	7.25048	11.3899	21.7636	CTCF
chr16	85936202	85936754	IRF8	2.72009	4.11495	4.28008	CTCF
chr16	85962130	85962233	IRF8	3.48972	2.06965	2.10981	CTCF
chr16	85987538	85987749	IRF8	12.3763	16.0494	13.2308	CTCF
chr16	86044338	86044459	IRF8	3.11058	2.64348	4.0285	CTCF
chr16	86072901	86073095	IRF8	5.47727	4.67624	4.98741	CTCF
chr16	86517574	86517985	IRF8	5.01569	6.67743	8.75191	CTCF
chr16	86519844	86520399	IRF8	3.38022	3.98131	5.38543	CTCF
chr17	9729133	9729339	GAS7	3.56612	3.31755	3.91674	CTCF
chr17	9862387	9862536	GAS7	0.699153	0.448127	2.93086	CTCF
chr17	9906042	9906213	GAS7	3.48235	3.39984	1.671	CTCF
chr17	9924737	9925178	GAS7	8.32813	6.34011	5.16262	CTCF
chr17	9959478	9959671	GAS7	18.9519	12.8937	12.506	CTCF
chr17	9982132	9982504	GAS7	6.60082	5.31313	12.5159	CTCF
chr17	9987916	9988096	GAS7	4.20168	4.17582	6.26733	CTCF
chr17	10040628	10040837	GAS7	3.61949	4.78658	9.01532	CTCF
chr17	10062842	10062941	GAS7	1.05768	1.85808	4.07174	CTCF
chr17	10063052	10063273	GAS7	1.26174	4.31167	5.15926	CTCF
chr17	10117519	10117902	GAS7	7.50196	11.3856	25.0319	CTCF
chr17	10199077	10199365	GAS7	2.57945	2.64246	2.24222	CTCF
chr17	10226645	10227332	GAS7	11.4792	9.10375	6.8559	CTCF
chr17	10251466	10251678	GAS7	2.2614	1.94136	2.8506	CTCF
chr17	10295699	10296251	GAS7	12.9846	8.18249	10.2509	CTCF
chr17	10327558	10328059	GAS7	14.1984	11.6433	12.6804	CTCF
chr17	10349523	10349738	GAS7	5.37535	4.89026	2.24691	CTCF
chr17	10357756	10358123	GAS7	4.26194	3.0573	2.01703	CTCF
chr17	10614362	10615064	GAS7	19.903	19.2429	19.4839	CTCF
chr17	10616605	10616823	GAS7	12.7135	9.76837	11.1686	CTCF
chr17	10618174	10618403	GAS7	13.9458	11.2696	16.9531	CTCF
chr17	10646519	10646684	GAS7	2.84136	2.00598	1.92048	CTCF
chr17	33751213	33751376	CCL2	3.20426	3.39649	3.74043	CTCF
chr17	33779126	33779502	CCL2	10.4899	6.75001	9.08261	CTCF
chr17	33927871	33928228	CCL2	7.07255	4.40077	6.26405	CTCF
chr17	34081265	34081591	CCL2	2.56715	2.60618	3.03184	CTCF
chr17	34146561	34146723	CCL2	3.39899	3.40967	2.85999	CTCF
chr17	34163779	34164000	CCL2	4.49671	6.83584	9.04077	CTCF
chr17	34171274	34171671	CCL2	13.6586	14.6575	19.7899	CTCF
chr17	34199539	34200647	CCL2	75.601	85.2679	99.0677	CTCF
chr17	34234295	34234398	CCL2	1.08113	1.66597	4.15233	CTCF
chr17	34306387	34306736	CCL2	1.35662	3.90835	8.95418	CTCF
chr17	34318606	34318764	CCL2	4.52899	3.05342	5.09686	CTCF
chr17	34378708	34378897	CCL2	5.44396	5.08083	3.50897	CTCF
chr17	34382541	34383060	CCL2	8.4107	4.52242	3.57672	CTCF
chr17	34420233	34420594	CCL2	4.8013	3.30171	4.07351	CTCF
chr17	34638301	34638516	CCL2	3.11492	2.24911	3.01324	CTCF
chr19	32976316	32976517	CEBPa	4.14641	4.07815	2.78797	CTCF
chr19	33119154	33119353	CEBPa	2.65569	2.36777	1.93973	CTCF
chr19	33125782	33126459	CEBPa	16.5713	14.2469	12.5587	CTCF
chr19	33143705	33144327	CEBPa	10.6015	9.39073	9.01845	CTCF
chr19	33176354	33176482	CEBPa	1.3751	2.44001	3.2521	CTCF
chr19	33176841	33177191	CEBPa	2.62581	2.19824	3.28393	CTCF
chr19	33177355	33177819	CEBPa	2.34457	2.34711	3.71948	CTCF
chr19	33184323	33184531	CEBPa	3.96835	3.78318	4.55265	CTCF
chr19	33214655	33214862	CEBPa	3.48506	5.0699	5.73444	CTCF
chr19	33219562	33219725	CEBPa	3.99092	4.34797	3.10007	CTCF
chr19	33235158	33235736	CEBPa	42.1015	43.7117	46.9653	CTCF
chr19	33241592	33242229	CEBPa	26.7967	32.5336	40.2401	CTCF
chr19	33249093	33249294	CEBPa	4.43336	6.68979	11.3237	CTCF
chr19	33249406	33249526	CEBPa	2.43749	4.05967	8.35513	CTCF
chr19	33260713	33261116	CEBPa	2.84715	3.23318	4.029	CTCF
chr19	33261627	33261764	CEBPa	2.99812	2.78451	2.28899	CTCF
chr19	33267976	33268132	CEBPa	2.38136	2.43531	3.67904	CTCF
chr19	33287054	33287242	CEBPa	0.979546	0.863769	2.96975	CTCF
chr19	33302149	33302293	CEBPa	2.24042	1.67382	6.1702	CTCF
chr19	33302489	33302786	CEBPa	2.91123	4.16346	8.92033	CTCF
chr19	33372407	33372585	CEBPa	2.44145	3.79162	6.56884	CTCF
chr19	33374234	33374346	CEBPa	3.04836	2.34075	5.25432	CTCF
chr19	33416301	33416530	CEBPa	14.9564	13.8435	10.4558	CTCF
chr19	33430768	33430945	CEBPa	7.47983	8.3586	7.67886	CTCF
chr19	33767927	33768133	CEBPa	5.20672	5.69615	6.64598	CTCF
chr19	33771606	33771858	CEBPa	8.32579	9.00607	12.3901	CTCF
chr20	22334234	22334460	CD93	11.6428	8.63639	10.4612	CTCF
chr20	22339096	22339436	CD93	18.2764	13.7772	14.4207	CTCF
chr20	22386125	22386280	CD93	2.31587	1.55436	3.3569	CTCF
chr20	22684105	22684306	CD93	10.8488	11.6223	11.071	CTCF
chr20	22735111	22735275	CD93	4.24272	2.59521	2.77482	CTCF
chr20	22851810	22852042	CD93	4.18944	2.66079	3.00166	CTCF
chr20	22974460	22974607	CD93	2.94326	1.73741	4.65035	CTCF
chr20	23021540	23021857	CD93	1.37116	2.40196	7.38204	CTCF
chr20	23048583	23048770	CD93	3.97998	2.98938	7.24221	CTCF
chr20	23048976	23049128	CD93	2.06942	2.83978	6.00086	CTCF
chr20	23049280	23049441	CD93	2.87459	3.50842	5.2487	CTCF
chr20	23050843	23051093	CD93	2.99883	4.15155	8.96269	CTCF
chr20	23062177	23062436	CD93	4.46977	4.55927	7.35727	CTCF
chr20	23087993	23088144	CD93	0.531844	1.09719	4.34521	CTCF
chr20	23125557	23126073	CD93	2.17131	4.87992	6.49287	CTCF
chr20	23142777	23142933	CD93	0.888346	1.2892	2.70642	CTCF
chr20	23143162	23143392	CD93	0.767996	2.4377	3.6758	CTCF
chr20	23165244	23165480	CD93	3.7127	4.08609	3.92311	CTCF
chr20	23200809	23201534	CD93	14.0479	9.30431	3.45426	CTCF
chr20	23235279	23235871	CD93	7.60769	7.69599	8.57609	CTCF
chr20	23245651	23246031	CD93	3.29281	5.87887	6.87428	CTCF
chr20	23299305	23299665	CD93	3.66537	1.89401	0.962172	CTCF
chr20	23320448	23320704	CD93	4.40763	4.97974	3.47985	CTCF
chr20	23340284	23340864	CD93	38.8307	46.2698	49.0946	CTCF
chr20	23349736	23349998	CD93	3.37915	4.28022	4.8274	CTCF
chr20	23350094	23350774	CD93	2.66995	3.38783	3.59421	CTCF
chr20	23441788	23442150	CD93	1.58737	1.98018	2.73956	CTCF
chr20	23606608	23606968	CD93	3.23168	3.81683	4.79568	CTCF
chr20	31822932	31823031	HCK	3.24941	2.86811	1.91619	CTCF
chr20	31852814	31852926	HCK	3.28532	4.86456	0.995535	CTCF
chr20	32521815	32521963	HCK	8.5576	11.9023	8.7422	CTCF
chr20	32652922	32653143	HCK	11.7663	12.2511	10.9473	CTCF
chr20	39112168	39112413	MAFB	1.90769	2.10818	3.94848	CTCF
chr20	39269010	39269303	MAFB	2.82444	5.20892	6.33166	CTCF
chr20	39829388	39829524	MAFB	0.418843	1.62538	4.09075	CTCF
chr20	39886103	39887159	MAFB	1.51651	2.10575	7.64104	CTCF
chr20	40192203	40192359	MAFB	0.964107	0.891235	4.95603	CTCF
chr20	40251464	40251596	MAFB	2.29547	3.90851	3.89008	CTCF
chr20	40265949	40266495	MAFB	2.06196	3.92352	5.39496	CTCF
chr20	40326615	40327147	MAFB	0.47777	1.4901	12.3322	CTCF
chr20	40470637	40471621	MAFB	1.87377	1.99823	9.89094	CTCF
chr20	40506456	40507090	MAFB	0.361602	5.80806	12.2393	CTCF
chr20	40532150	40532432	MAFB	4.15428	5.59679	4.30489	CTCF
chr20	40689099	40690373	MAFB	5.35494	11.354	13.8471	CTCF
chr20	40741633	40741782	MAFB	1.42271	2.46726	3.28454	CTCF
chr20	40945935	40946260	MAFB	5.60445	7.46293	7.87297	CTCF
chr20	40962987	40963314	MAFB	5.71567	8.48327	6.83715	CTCF
chr1	12081670	12082130	TNFRSF1B	3.38581	1.96561	2.05681	Enhancer
chr1	12088557	12089019	TNFRSF1B	4.92243	3.14366	2.36356	Enhancer
chr1	12132141	12132342	TNFRSF1B	2.61065	2.06873	2.94075	Enhancer
chr1	12132917	12133388	TNFRSF1B	3.16642	3.26033	3.42097	Enhancer
chr1	12179061	12179408	TNFRSF1B	3.16889	2.16846	2.87266	Enhancer
chr1	12184010	12184123	TNFRSF1B	1.42768	1.06615	2.78951	Enhancer
chr1	12230643	12230749	TNFRSF1B	2.80772	2.86408	3.43416	Enhancer
chr1	167447682	167448037	CREG1	0.642605	2.12085	3.10089	Enhancer
chr1	167548428	167548664	CREG1	1.13062	2.36339	6.3354	Enhancer
chr1	167563518	167563875	CREG1	0.771109	1.65262	6.47784	Enhancer
chr1	167584799	167584999	CREG1	2.6306	2.98187	2.32365	Enhancer
chr1	167600815	167601766	CREG1	15.4155	14.2089	13.9867	Enhancer
chr1	167602107	167602310	CREG1	13.3551	9.94669	5.6459	Enhancer
chr1	167627746	167627883	CREG1	2.25692	3.00314	4.6638	Enhancer
chr1	167630841	167630957	CREG1	3.55493	4.14535	6.34779	Enhancer
chr1	167650237	167650513	CREG1	3.64402	2.99076	3.54387	Enhancer
chr1	167714597	167714791	CREG1	4.78379	2.9419	4.06348	Enhancer
chr2	27704726	27704882	FOSL2	5.49619	6.28532	5.39264	Enhancer
chr2	27756847	27757163	FOSL2	0.828198	3.10442	6.29765	Enhancer
chr2	27959589	27959740	FOSL2	0.715931	1.35494	2.81472	Enhancer
chr2	28409276	28409522	FOSL2	1.10799	2.46037	6.56343	Enhancer
chr2	28410249	28410780	FOSL2	3.25449	2.61667	4.42943	Enhancer
chr2	28423932	28424190	FOSL2	2.76896	3.94061	9.25626	Enhancer
chr2	28448358	28448608	FOSL2	8.66204	12.8689	17.5027	Enhancer
chr2	28463942	28464292	FOSL2	2.76082	5.66827	10.2851	Enhancer
chr2	64644375	64644601	PELI1	3.10643	3.22128	3.34577	Enhancer
chr2	64644712	64644856	PELI1	2.74981	2.76572	3.32193	Enhancer
chr2	64645129	64645347	PELI1	2.50606	2.82263	1.85638	Enhancer
chr2	64864761	64864899	PELI1	3.70543	2.77651	2.49316	Enhancer
chr2	69642732	69642895	MXD1	1.273	1.35953	2.79753	Enhancer
chr2	69693449	69693884	MXD1	4.07582	1.65597	1.13156	Enhancer
chr2	69694158	69694351	MXD1	3.92889	2.53707	1.26571	Enhancer
chr2	69756191	69756410	MXD1	0.981052	1.48746	2.78633	Enhancer
chr2	69762827	69763067	MXD1	1.3299	1.77591	3.46764	Enhancer
chr2	69770247	69770550	MXD1	0.862871	2.05326	4.21808	Enhancer
chr3	46088980	46089648	CCR1	2.01988	4.43525	10.244	Enhancer
chr3	46089786	46089989	CCR1	1.92287	3.02081	7.0634	Enhancer
chr3	46098488	46098825	CCR1	2.18082	2.63109	3.15486	Enhancer
chr3	46186841	46187031	CCR1	3.45164	2.47297	2.55915	Enhancer
chr3	46187154	46187414	CCR1	4.01224	2.41583	3.02911	Enhancer
chr3	46221535	46221669	CCR1	0.918242	2.36507	3.09214	Enhancer
chr3	46222800	46223084	CCR1	0.832421	2.18271	4.54198	Enhancer
chr3	46228347	46228672	CCR1	1.06694	2.91122	5.2773	Enhancer
chr3	46349827	46350015	CCR1	3.57246	1.52316	1.03247	Enhancer
chr3	46350124	46350224	CCR1	3.37309	1.46789	1.20323	Enhancer
chr3	46396233	46396416	CCR1	1.36356	1.88259	5.11215	Enhancer
chr3	46406266	46406469	CCR1	0.91684	1.1776	3.59795	Enhancer
chr3	101837283	101837483	NFKBIZ	0.608776	1.69078	3.50266	Enhancer
chr3	101850826	101851030	NFKBIZ	4.26491	4.70861	5.02193	Enhancer
chr3	101898680	101899269	NFKBIZ	0.868712	1.99871	5.69161	Enhancer
chr3	101936686	101937083	NFKBIZ	0.843336	2.96234	5.38763	Enhancer
chr3	101938494	101938822	NFKBIZ	0.328341	1.76617	3.75772	Enhancer
chr3	101940615	101940866	NFKBIZ	0.657141	1.82784	4.49897	Enhancer
chr3	101942432	101942644	NFKBIZ	0.76582	1.47045	3.59997	Enhancer
chr3	101966113	101966557	NFKBIZ	0.278739	0.650552	3.14399	Enhancer
chr3	101987969	101988169	NFKBIZ	0.402021	1.34466	2.95123	Enhancer
chr3	102020984	102021159	NFKBIZ	0.268087	0.696631	2.85921	Enhancer
chr3	102026705	102026877	NFKBIZ	0.666263	0.474854	3.48459	Enhancer
chr3	102038522	102038918	NFKBIZ	0.337265	0.535982	3.93536	Enhancer
chr3	102205715	102205979	NFKBIZ	0.910143	2.82686	3.95764	Enhancer
chr3	102233966	102234232	NFKBIZ	7.84301	6.6961	1.66135	Enhancer
chr3	172512335	172512828	TNFSF10	5.82237	11.6281	19.6361	Enhancer
chr3	172522311	172522730	TNFSF10	1.40929	2.49135	5.12967	Enhancer
chr3	172530302	172530991	TNFSF10	1.83159	3.28136	5.27268	Enhancer
chr3	172558979	172559416	TNFSF10	2.25246	7.26052	12.23	Enhancer
chr3	172562747	172563509	TNFSF10	1.21763	2.96742	7.39167	Enhancer
chr3	172568723	172569074	TNFSF10	1.16597	2.14985	5.36543	Enhancer
chr3	172580711	172580984	TNFSF10	2.03152	2.3486	3.41133	Enhancer
chr3	172586546	172586765	TNFSF10	2.98101	3.70959	5.99018	Enhancer
chr3	172592242	172592610	TNFSF10	19.2667	16.8997	14.1275	Enhancer
chr4	26074645	26075037	RBPJ	0.731621	1.84345	7.10878	Enhancer
chr4	26075565	26075770	RBPJ	0.77006	1.07704	4.13731	Enhancer
chr4	26076175	26076654	RBPJ	0.924704	2.12996	7.17797	Enhancer
chr4	26088584	26088882	RBPJ	0.50256	1.50439	2.88611	Enhancer
chr4	26141997	26142288	RBPJ	0.966503	1.01051	3.02802	Enhancer
chr4	26218152	26218490	RBPJ	0.302697	1.04631	3.03132	Enhancer
chr4	26239302	26239680	RBPJ	0.355286	0.754522	3.5152	Enhancer
chr4	26273658	26273878	RBPJ	0.820402	1.38276	3.08672	Enhancer
chr4	26275222	26275445	RBPJ	0.868871	1.80023	3.53372	Enhancer
chr4	26321810	26321913	RBPJ	3.17096	3.43467	4.28306	Enhancer
chr4	26331049	26331196	RBPJ	2.84088	2.77292	3.00197	Enhancer
chr4	40057793	40058109	RBM47	3.47122	4.24686	3.19535	Enhancer
chr4	40150580	40150820	RBM47	2.23369	4.3346	3.2184	Enhancer
chr4	40327346	40327710	RBM47	2.5269	6.29572	5.25838	Enhancer
chr4	40483404	40483534	RBM47	1.74982	2.41426	2.95236	Enhancer
chr4	40486465	40487131	RBM47	0.764642	4.52189	7.06351	Enhancer
chr4	40502267	40502535	RBM47	0.481159	1.70447	3.47113	Enhancer
chr4	40503018	40503211	RBM47	0.202311	2.01096	4.01654	Enhancer
chr4	40554068	40554378	RBM47	1.66321	4.29929	9.78633	Enhancer
chr4	40559600	40559959	RBM47	0.94532	1.18209	6.76567	Enhancer
chr4	40573954	40574222	RBM47	1.60248	4.86016	10.9434	Enhancer
chr4	40576938	40577522	RBM47	1.00231	5.04518	14.9902	Enhancer
chr4	40601596	40601957	RBM47	0.650944	2.17164	3.47633	Enhancer
chr4	40621654	40622173	RBM47	2.18383	6.03704	11.6936	Enhancer
chr4	40672552	40672782	RBM47	1.2063	1.41557	4.31496	Enhancer
chr4	40672885	40673542	RBM47	1.05183	3.09443	5.69427	Enhancer
chr4	40683836	40684080	RBM47	1.35445	2.43909	4.95916	Enhancer
chr4	40710958	40711386	RBM47	3.25002	5.63392	8.033	Enhancer
chr4	40731347	40731675	RBM47	2.13844	2.01188	5.46436	Enhancer
chr4	40731814	40732213	RBM47	2.2455	2.83366	9.187	Enhancer
chr5	140245312	140245568	CD14	2.42517	2.80388	1.18898	Enhancer
chr5	140251502	140251922	CD14	1.89032	2.6194	1.07542	Enhancer
chr5	140372506	140372632	CD14	1.66873	3.77236	1.13592	Enhancer
chr5	140402393	140402540	CD14	2.69442	2.35715	1.20707	Enhancer
chr5	140402656	140402924	CD14	1.67446	3.16669	1.65648	Enhancer
chr5	140555853	140556122	CD14	2.49343	6.01479	10.4044	Enhancer
chr5	140556560	140556698	CD14	3.63869	6.91232	7.98893	Enhancer
chr5	140569314	140569495	CD14	4.36849	5.10196	7.87962	Enhancer
chr5	140576166	140576954	CD14	2.10547	4.4235	10.7489	Enhancer
chr5	140588401	140588568	CD14	1.37857	2.10589	7.22313	Enhancer
chr5	140589175	140589768	CD14	1.0251	2.74993	8.8734	Enhancer
chr5	140595039	140595190	CD14	1.43935	2.07952	4.33301	Enhancer
chr5	140595513	140595886	CD14	1.55755	5.01802	10.8267	Enhancer
chr5	140602982	140603229	CD14	1.24825	2.50376	8.0556	Enhancer
chr5	140608831	140608949	CD14	2.14378	4.46203	8.79741	Enhancer
chr5	140609168	140609609	CD14	2.06581	10.2311	13.9665	Enhancer
chr5	140611188	140611673	CD14	2.54973	6.4036	9.02201	Enhancer
chr5	140611926	140612339	CD14	7.5286	19.5208	27.7634	Enhancer
chr5	140647240	140647339	CD14	1.77745	2.68408	3.01954	Enhancer
chr6	139368205	139368370	CITED2	2.59077	5.38211	8.4651	Enhancer
chr6	139839468	139839790	CITED2	0.195665	1.17033	3.4092	Enhancer
chr6	139841972	139842097	CITED2	0	1.4841	2.62947	Enhancer
chr6	140039460	140039630	CITED2	0.145351	0.417364	2.92313	Enhancer
chr6	140393708	140394061	CITED2	0.33223	0.913713	3.17109	Enhancer
chr7	140177641	140177773	KDM7A	6.01935	4.9411	8.29715	Enhancer
chr7	140210200	140210653	KDM7A	1.92292	2.77807	3.81063	Enhancer
chr7	140229839	140230046	KDM7A	0.856692	2.16143	3.47971	Enhancer
chr7	140233005	140233437	KDM7A	1.04482	2.37602	4.2927	Enhancer
chr7	140241953	140242334	KDM7A	0.962075	2.07995	5.41036	Enhancer
chr7	140261597	140261897	KDM7A	2.36042	3.23489	3.69662	Enhancer
chr7	140316291	140316576	KDM7A	2.75246	5.41889	7.42373	Enhancer
chr8	55843913	55844481	LYN	3.19316	2.61299	2.72063	Enhancer
chr8	55844540	55844760	LYN	2.3746	2.01843	3.7238	Enhancer
chr8	55884106	55884234	LYN	0.971762	1.94614	5.72276	Enhancer
chr8	55919452	55919855	LYN	2.36586	1.90953	2.8522	Enhancer
chr8	55939724	55940279	LYN	1.55359	2.99461	5.14705	Enhancer
chr8	55948418	55948576	LYN	0.899099	2.07352	4.31703	Enhancer
chr8	55972861	55972962	LYN	1.06681	1.34798	2.78075	Enhancer
chr8	55973163	55973338	LYN	1.57977	2.75076	4.20724	Enhancer
chr8	55976009	55976178	LYN	2.64918	1.3429	2.15811	Enhancer
chr8	56005475	56005681	LYN	1.27645	1.91855	3.80174	Enhancer
chr8	56073529	56073737	LYN	3.56107	4.15691	2.98035	Enhancer
chr8	115427494	115428065	TRPS1	1.82693	3.825	6.42815	Enhancer
chr8	115451489	115451720	TRPS1	2.0802	2.43741	4.69671	Enhancer
chr8	115451780	115451993	TRPS1	1.82167	2.09417	5.3064	Enhancer
chr8	115452079	115452376	TRPS1	4.59435	3.3025	5.18961	Enhancer
chr8	115576525	115576629	TRPS1	0.0645929	0.507611	2.71405	Enhancer
chr8	115585160	115585305	TRPS1	0.325022	0.886102	3.00214	Enhancer
chr8	115846541	115846928	TRPS1	0.308701	1.21552	3.00866	Enhancer
chr8	125110875	125111132	TRIB1	0.893792	1.93515	3.10984	Enhancer
chr8	125191762	125192198	TRIB1	0.685249	1.59549	2.71948	Enhancer
chr8	125219285	125219644	TRIB1	0.583373	0.82933	3.09185	Enhancer
chr8	125311440	125311715	TRIB1	0.543258	1.08104	2.94069	Enhancer
chr8	125341445	125341652	TRIB1	0.452899	0.892734	3.06677	Enhancer
chr8	125342185	125342645	TRIB1	0.708006	1.33587	5.3838	Enhancer
chr8	125344016	125344261	TRIB1	0.433337	0.815833	3.94844	Enhancer
chr8	125431408	125431565	TRIB1	4.22027	6.90701	6.86508	Enhancer
chr8	125439758	125439971	TRIB1	0.934465	2.61818	7.61147	Enhancer
chr8	125440166	125440607	TRIB1	1.16641	3.5387	9.5456	Enhancer
chr8	125466941	125467486	TRIB1	1.00152	1.57047	3.71101	Enhancer
chr8	125499001	125499278	TRIB1	2.01502	2.62721	3.11606	Enhancer
chr8	125512701	125513474	TRIB1	0.49282	5.2478	8.88147	Enhancer
chr8	125608055	125608265	TRIB1	1.97726	3.27938	4.30226	Enhancer
chr8	125612791	125613386	TRIB1	0.875066	1.1977	3.54614	Enhancer
chr8	125637563	125637691	TRIB1	2.37852	3.34253	4.69387	Enhancer
chr8	125698777	125698968	TRIB1	0.760266	2.24384	3.2175	Enhancer
chr9	108579943	108580354	KLF4	0.39639	1.91786	3.3558	Enhancer
chr10	3775351	3775556	KLF6	0.46239	1.19074	3.09421	Enhancer
chr10	3782573	3783195	KLF6	3.19246	3.4215	5.7017	Enhancer
chr10	3783462	3783561	KLF6	2.60091	3.31698	4.38881	Enhancer
chr10	3805228	3805524	KLF6	0.518638	1.14894	2.76119	Enhancer
chr10	4130719	4130983	KLF6	1.25696	2.68217	2.43494	Enhancer
chr10	4131665	4131801	KLF6	1.50813	1.56265	2.90732	Enhancer
chr10	4131889	4132195	KLF6	0.693506	1.36771	3.63967	Enhancer
chr10	4149414	4149638	KLF6	3.14239	1.78683	1.0547	Enhancer
chr10	4333238	4333845	KLF6	0.278968	0.830723	2.78332	Enhancer
chr10	4514372	4514840	KLF6	1.08385	2.20255	4.17011	Enhancer
chr10	4663121	4663487	KLF6	2.57654	3.19696	5.18722	Enhancer
chr10	68989289	68989544	SRGN	3.0012	4.09456	4.19349	Enhancer
chr10	69045464	69045887	SRGN	1.52806	2.37594	6.25376	Enhancer
chr10	69046092	69046193	SRGN	2.13377	2.33764	3.09391	Enhancer
chr10	69049678	69049851	SRGN	1.39016	2.40972	6.12952	Enhancer
chr10	69052157	69052362	SRGN	1.27983	1.55409	4.25748	Enhancer
chr10	69061339	69061951	SRGN	3.22814	7.99561	14.6832	Enhancer
chr10	69065442	69066323	SRGN	2.60163	4.10653	5.36368	Enhancer
chr10	69072968	69073423	SRGN	2.07615	3.2547	4.01824	Enhancer
chr10	69089016	69089175	SRGN	6.46307	8.84149	13.317	Enhancer
chr10	69101440	69101783	SRGN	2.10005	4.25601	8.45796	Enhancer
chr10	69101910	69102149	SRGN	1.77324	3.96423	8.82097	Enhancer
chr10	69124885	69125046	SRGN	4.85095	7.58617	9.21348	Enhancer
chr10	69146764	69147040	SRGN	1.32841	1.86071	3.58396	Enhancer
chr10	69180845	69181092	SRGN	2.30719	4.98595	4.91395	Enhancer
chr10	69228982	69229197	SRGN	2.5956	4.07571	2.86155	Enhancer
chr10	69229380	69229812	SRGN	1.89588	2.7648	2.55829	Enhancer
chr10	69239943	69240069	SRGN	0.45811	3.0537	1.80211	Enhancer
chr10	69390203	69390471	SRGN	1.36885	3.89222	2.29978	Enhancer
chr10	72079338	72079685	DDIT4	3.59853	1.65983	1.29815	Enhancer
chr10	72223704	72224121	DDIT4	1.55168	2.33281	3.78183	Enhancer
chr10	72248484	72249103	DDIT4	5.30104	3.08776	2.50639	Enhancer
chr10	72259936	72260097	DDIT4	3.427	2.56883	2.82989	Enhancer
chr10	72297199	72297629	DDIT4	4.31889	3.26308	3.73068	Enhancer
chr10	72298022	72298260	DDIT4	3.38888	2.88345	2.70661	Enhancer
chr10	72320729	72321086	DDIT4	5.76114	4.32785	3.96542	Enhancer
chr10	72335582	72335785	DDIT4	19.5551	18.0193	20.6306	Enhancer
chr10	72345134	72345246	DDIT4	20.9536	24.624	28.2568	Enhancer
chr10	97069626	97069776	FRAT2	4.25476	4.57907	4.98233	Enhancer
chr10	97128616	97128799	FRAT2	4.93485	4.50587	2.32682	Enhancer
chr10	97129456	97129658	FRAT2	2.40843	3.49531	3.25475	Enhancer
chr10	97196076	97196215	FRAT2	4.14728	4.71377	5.54086	Enhancer
chr10	97218033	97218310	FRAT2	5.1368	3.89836	4.12329	Enhancer
chr11	33893662	33894344	LMO2	4.67236	6.82613	6.60035	Enhancer
chr11	33912350	33912616	LMO2	1.68905	1.93612	2.72977	Enhancer
chr11	33912734	33913064	LMO2	1.82123	2.88445	3.4286	Enhancer
chr11	33921242	33921681	LMO2	2.92671	2.958	2.14952	Enhancer
chr11	33930167	33931014	LMO2	1.73442	4.57763	4.15786	Enhancer
chr11	33936820	33937061	LMO2	1.22195	2.30395	3.51234	Enhancer
chr11	33937400	33937552	LMO2	1.29449	2.48963	3.49719	Enhancer
chr11	33941702	33941848	LMO2	1.4139	2.65486	3.58902	Enhancer
chr11	33959988	33960110	LMO2	2.24256	3.14418	3.48515	Enhancer
chr11	33972164	33972427	LMO2	10.4691	11.1344	9.52037	Enhancer
chr11	33972820	33972925	LMO2	6.73154	10.6579	9.34528	Enhancer
chr11	34050665	34050772	LMO2	3.03382	2.28444	0.650996	Enhancer
chr11	34067524	34067651	LMO2	4.14703	1.77176	1.53557	Enhancer
chr11	59216611	59217205	MPEG	3.35329	3.80865	4.68452	Enhancer
chr11	59222626	59223013	MPEG	1.0072	1.1876	3.68284	Enhancer
chr11	59224731	59224960	MPEG	0.969844	1.23358	2.78866	Enhancer
chr11	59247626	59248214	MPEG	0.951203	1.96222	3.304	Enhancer
chr11	59273419	59273638	MPEG	1.89603	2.41326	3.09594	Enhancer
chr11	59289493	59289707	MPEG	0.888836	1.9334	4.92488	Enhancer
chr11	59368693	59368988	MPEG	4.12725	3.99741	3.63981	Enhancer
chr11	59510951	59511275	MPEG	1.99193	2.80775	3.12746	Enhancer
chr11	117814947	117815125	IL10RA	6.86434	4.72357	2.50413	Enhancer
chr11	117815393	117815660	IL10RA	4.26972	6.20024	5.12538	Enhancer
chr11	117842222	117842499	IL10RA	2.97193	3.32957	6.3699	Enhancer
chr11	117930633	117931092	IL10RA	2.58292	2.72087	2.16313	Enhancer
chr11	117950919	117951515	IL10RA	16.8574	14.9973	11.0814	Enhancer
chr11	117959470	117959660	IL10RA	1.00943	3.63057	4.84142	Enhancer
chr11	117959741	117959950	IL10RA	0.869547	1.66241	3.32234	Enhancer
chr11	117970638	117970996	IL10RA	2.08165	3.03521	4.13162	Enhancer
chr11	117977104	117977394	IL10RA	1.00525	1.78435	3.31781	Enhancer
chr11	117987137	117987632	IL10RA	2.60703	2.93511	6.28599	Enhancer
chr11	117994370	117994729	IL10RA	0.820527	2.06838	5.87901	Enhancer
chr11	118002604	118002709	IL10RA	1.23405	1.78153	3.86697	Enhancer
chr11	118002876	118003047	IL10RA	1.3149	2.04911	4.18923	Enhancer
chr11	118003220	118003395	IL10RA	1.36353	1.57851	3.08256	Enhancer
chr11	118010965	118011334	IL10RA	1.66399	3.33611	5.84493	Enhancer
chr11	118012245	118012615	IL10RA	0.83612	1.97626	6.31159	Enhancer
chr11	118052304	118052485	IL10RA	22.5725	23.681	28.4651	Enhancer
chr11	118084253	118084595	IL10RA	1.70814	2.51801	3.73573	Enhancer
chr11	118088589	118089004	IL10RA	0.877815	2.74751	3.8042	Enhancer
chr11	118142824	118143222	IL10RA	0.384412	2.21361	3.39418	Enhancer
chr12	7369330	7369683	CD163	3.4462	2.8244	3.118	Enhancer
chr12	7498825	7499142	CD163	1.14803	1.99998	3.39527	Enhancer
chr12	7542857	7543245	CD163	0.49809	0.901786	3.37061	Enhancer
chr12	7555828	7556141	CD163	1.35226	1.24072	3.50456	Enhancer
chr12	7675523	7675774	CD163	1.06417	1.81457	2.79808	Enhancer
chr12	15527223	15527332	EPS8	0.748263	1.98091	4.40879	Enhancer
chr12	15571086	15571267	EPS8	3.77143	2.81307	2.57659	Enhancer
chr12	15700050	15700178	EPS8	0.614981	2.01183	4.92121	Enhancer
chr12	15700595	15700909	EPS8	0.961383	2.86769	5.46766	Enhancer
chr12	15726061	15726308	EPS8	0.585079	0.829412	4.16189	Enhancer
chr12	15863946	15864357	EPS8	2.04822	4.50551	6.21563	Enhancer
chr15	48358771	48358952	ATP8B4	1.47901	1.98444	3.55635	Enhancer
chr15	50053498	50053601	ATP8B4	0.593436	1.20089	3.64877	Enhancer
chr15	50055444	50055648	ATP8B4	1.58751	3.8756	5.84558	Enhancer
chr15	50055754	50055905	ATP8B4	1.61233	2.82243	3.46416	Enhancer
chr15	50107683	50107970	ATP8B4	0.794206	1.58426	5.44346	Enhancer
chr15	50109245	50109358	ATP8B4	3.15594	2.08899	1.96271	Enhancer
chr15	50134662	50135040	ATP8B4	3.51791	7.54798	8.09662	Enhancer
chr16	31253781	31254074	ITGAX	0.682186	1.56976	2.64476	Enhancer
chr16	31302142	31302346	ITGAX	1.60542	3.31643	4.11738	Enhancer
chr16	31367956	31368185	ITGAX	1.68278	1.85412	4.60938	Enhancer
chr16	31467174	31467509	ITGAX	5.45318	5.36922	3.79405	Enhancer
chr16	31476896	31477046	ITGAX	2.41347	3.54812	2.27249	Enhancer
chr16	31695774	31695967	ITGAX	4.75377	4.1897	6.10871	Enhancer
chr16	31869515	31869826	ITGAX	1.80546	2.58745	4.15803	Enhancer
chr16	85829556	85829995	IRF8	3.95095	6.0277	6.25278	Enhancer
chr16	85853589	85854036	IRF8	1.24112	3.40725	3.98397	Enhancer
chr16	85854114	85854351	IRF8	1.08328	2.34217	3.91668	Enhancer
chr16	85861107	85861224	IRF8	0.92942	1.9618	4.80561	Enhancer
chr16	85868517	85868786	IRF8	2.80069	1.82487	2.03963	Enhancer
chr16	85870214	85870371	IRF8	1.29068	1.83436	2.99195	Enhancer
chr16	85870800	85870915	IRF8	0.62687	1.37676	3.25414	Enhancer
chr16	85888851	85889218	IRF8	2.22656	3.26196	4.05317	Enhancer
chr16	85903725	85903889	IRF8	2.53277	2.79884	3.94374	Enhancer
chr16	85915196	85915445	IRF8	2.26249	3.73823	4.32622	Enhancer
chr16	85927558	85927704	IRF8	1.60798	4.25706	3.21729	Enhancer
chr16	85928368	85928779	IRF8	2.49842	6.82147	6.24523	Enhancer
chr16	85972647	85972897	IRF8	5.17075	2.90618	2.89147	Enhancer
chr16	85978539	85978763	IRF8	1.20643	1.7282	4.32842	Enhancer
chr16	85982568	85982742	IRF8	2.62543	4.83606	3.92807	Enhancer
chr16	85999069	85999659	IRF8	4.62379	4.90939	4.67867	Enhancer
chr16	86017726	86017922	IRF8	25.916	26.0301	22.2038	Enhancer
chr16	86018125	86018360	IRF8	17.8694	20.5027	20.6643	Enhancer
chr16	86018609	86018826	IRF8	15.6435	22.0756	25.8404	Enhancer
chr16	86029408	86029751	IRF8	5.61321	4.27283	4.2917	Enhancer
chr16	86033078	86033452	IRF8	3.55637	1.86207	1.21243	Enhancer
chr17	9968063	9968243	GAS7	24.469	16.4162	18.832	Enhancer
chr17	9974481	9974717	GAS7	2.35104	3.21903	7.06448	Enhancer
chr17	10013517	10013713	GAS7	2.17336	2.25018	4.17556	Enhancer
chr17	10018362	10018860	GAS7	1.49653	3.58468	4.825	Enhancer
chr17	10033491	10033919	GAS7	4.67567	2.38009	2.07307	Enhancer
chr17	10034004	10034277	GAS7	3.20206	4.95444	5.7486	Enhancer
chr17	10042292	10042495	GAS7	5.05746	3.07259	1.90648	Enhancer
chr17	10050601	10050800	GAS7	2.40425	3.22896	3.81605	Enhancer
chr17	10052604	10052729	GAS7	2.70381	2.88948	1.45758	Enhancer
chr17	10061061	10061308	GAS7	0.789778	2.91697	4.53366	Enhancer
chr17	10063676	10064184	GAS7	0.914667	4.99671	7.11393	Enhancer
chr17	10087312	10087756	GAS7	3.95624	2.52926	2.28009	Enhancer
chr17	10107383	10107497	GAS7	0.834287	1.8425	3.24202	Enhancer
chr17	10136124	10136307	GAS7	1.65022	2.13052	3.55696	Enhancer
chr17	10150158	10150371	GAS7	3.22692	4.1436	5.20382	Enhancer
chr17	10156698	10156851	GAS7	2.65327	2.98281	2.15709	Enhancer
chr17	10156943	10157570	GAS7	1.8247	2.67935	4.46388	Enhancer
chr17	10171370	10171512	GAS7	1.45832	3.40458	1.90711	Enhancer
chr17	10172237	10172408	GAS7	3.75165	2.64635	2.378	Enhancer
chr17	10172535	10172739	GAS7	2.22032	4.73825	3.70522	Enhancer
chr17	10225541	10225702	GAS7	3.25162	2.74361	3.67478	Enhancer
chr17	10318603	10318765	GAS7	1.29184	2.12604	3.42692	Enhancer
chr17	10613790	10614117	GAS7	3.7427	5.72995	7.41136	Enhancer
chr17	34200720	34201512	CCL2	18.7773	19.7366	21.5695	Enhancer
chr17	34220991	34221333	CCL2	1.04276	2.19944	5.88349	Enhancer
chr17	34236528	34236828	CCL2	4.61237	4.46532	5.24063	Enhancer
chr17	34242575	34243051	CCL2	1.60316	5.25769	10.1818	Enhancer
chr17	34246567	34246755	CCL2	0.955121	4.36473	8.8469	Enhancer
chr17	34387219	34387569	CCL2	1.73689	1.90969	2.82752	Enhancer
chr17	34399236	34399377	CCL2	1.38552	2.3803	2.69909	Enhancer
chr19	33186556	33186691	CEBPa	2.65561	2.67061	2.69345	Enhancer
chr19	33261184	33261316	CEBPa	3.14949	1.71729	1.67398	Enhancer
chr19	33273924	33274430	CEBPa	1.20775	1.67429	3.26883	Enhancer
chr19	33280567	33280756	CEBPa	1.29918	1.65348	2.88842	Enhancer
chr19	33292740	33292886	CEBPa	0.851159	1.15419	2.8264	Enhancer
chr19	33293338	33293527	CEBPa	0.985433	2.38813	5.66681	Enhancer
chr19	33332054	33332154	CEBPa	0.782139	1.17621	3.65418	Enhancer
chr19	33332296	33332639	CEBPa	0.637049	1.11263	4.3429	Enhancer
chr19	33374542	33374643	CEBPa	2.4523	2.9662	3.98175	Enhancer
chr19	33397235	33397348	CEBPa	4.97405	4.60387	3.30191	Enhancer
chr20	22339608	22339742	CD93	3.91001	2.66851	3.19512	Enhancer
chr20	22339940	22340267	CD93	2.62924	3.00772	3.99522	Enhancer
chr20	22684785	22685012	CD93	9.40353	6.13152	4.60216	Enhancer
chr20	22719115	22719228	CD93	4.27355	2.70797	1.4819	Enhancer
chr20	23087112	23087455	CD93	0.613508	1.46474	2.62565	Enhancer
chr20	23126317	23126541	CD93	1.0329	2.57903	3.58306	Enhancer
chr20	23147933	23148158	CD93	0.648134	1.55593	3.70712	Enhancer
chr20	23225410	23225846	CD93	0.86538	2.69898	3.38123	Enhancer
chr20	23234808	23234979	CD93	1.49823	1.89165	2.79672	Enhancer
chr20	23247295	23247527	CD93	1.8816	3.24096	2.54101	Enhancer
chr20	23332019	23332336	CD93	3.57182	5.27987	5.04023	Enhancer
chr20	23339490	23339798	CD93	5.70611	9.13162	8.46153	Enhancer
chr20	39909590	39909954	MAFB	0.420245	0.755246	2.74926	Enhancer
chr20	40241962	40242224	MAFB	0.719567	1.78158	4.02959	Enhancer
chr20	40262323	40262476	MAFB	0.645265	1.36362	3.23233	Enhancer
chr20	40279310	40279714	MAFB	0.278043	0.551313	4.49472	Enhancer
chr20	40325307	40325492	MAFB	0.498531	0.88819	4.54669	Enhancer
chr20	40339747	40340543	MAFB	0.339614	0.997165	8.01393	Enhancer
chr20	40427099	40427296	MAFB	0.312995	0.448232	2.68738	Enhancer
chr20	40436783	40437122	MAFB	0.193031	0.661584	5.83819	Enhancer
chr20	40470463	40470562	MAFB	2.1531	1.18603	5.19999	Enhancer
chr20	40497879	40498748	MAFB	0.531602	2.78696	7.49032	Enhancer
chr20	40697721	40697868	MAFB	0.453562	0.923691	2.77534	Enhancer
chr1	12125818	12125917	TNFRSF1B	4.42876	5.72367	7.13574	Promoter
chr2	27891185	27891334	FOSL2	0.744863	0.868624	2.69212	Promoter
chr2	28392730	28392954	FOSL2	5.40077	4.489	8.35998	Promoter
chr2	64524015	64524330	PELI1	4.92294	3.90399	4.91	Promoter
chr2	69829066	69829334	MXD1	2.61212	2.62239	3.84413	Promoter
chr2	69893621	69894574	MXD1	3.45905	3.37426	3.56993	Promoter
chr3	46407053	46407604	CCR1	2.52968	2.33392	4.54492	Promoter
chr3	101827174	101827589	NFKBIZ	2.47146	3.72554	3.98293	Promoter
chr3	101849311	101849537	NFKBIZ	1.64519	3.94223	5.64555	Promoter
chr3	172523115	172523688	TNFSF10	2.19082	3.60906	9.44462	Promoter
chr4	26319055	26319392	RBPJ	2.13342	3.04545	7.06443	Promoter
chr4	40055530	40056053	RBM47	1.48247	2.71411	2.8789	Promoter
chr4	40057372	40057603	RBM47	2.14224	3.61568	2.33036	Promoter
chr5	140401087	140401283	CD14	2.56555	3.36998	2.00437	Promoter
chr5	140564527	140564928	CD14	3.90442	4.06371	6.76491	Promoter
chr5	140647435	140648194	CD14	5.03961	4.98727	6.87887	Promoter
chr5	140664280	140665116	CD14	2.65844	3.21967	3.69798	Promoter
chr6	139374493	139374739	CITED2	4.56383	4.68429	13.3231	Promoter
chr7	140176909	140177530	KDM7A	6.01092	7.46354	10.7038	Promoter
chr8	55879679	55879893	LYN	2.72227	4.1485	8.12283	Promoter
chr8	125430079	125430423	TRIB1	7.31385	12.0848	14.6217	Promoter
chr10	69087856	69088229	SRGN	7.52516	7.72748	12.9506	Promoter
chr10	69179552	69180825	SRGN	4.91086	7.04005	7.79052	Promoter
chr10	72273786	72274073	DDIT4	5.35366	3.61009	9.57586	Promoter
chr10	72354345	72354722	DDIT4	4.75899	5.25959	4.58446	Promoter
chr11	33869869	33870255	LMO2	5.02573	8.22447	9.62554	Promoter
chr11	33891984	33892187	LMO2	2.2005	6.05326	5.90266	Promoter
chr11	34052307	34052434	LMO2	2.24761	2.99625	2.5442	Promoter
chr11	59212828	59213055	MPEG	1.42315	3.70795	4.81151	Promoter
chr11	117828524	117828942	IL10RA	6.02092	4.99006	2.93811	Promoter
chr12	7189493	7189669	CD163	3.59046	3.40496	2.41257	Promoter
chr12	15882175	15882494	EPS8	3.40282	3.17973	4.61715	Promoter
chr15	49155558	49155872	ATP8B4	1.49053	1.69097	2.99277	Promoter
chr15	50114457	50114680	ATP8B4	1.08075	3.06218	6.25274	Promoter
chr16	31094862	31095027	ITGAX	1.66938	1.88708	2.89952	Promoter
chr16	85899026	85899163	IRF8	2.82297	3.56748	10.3217	Promoter
chr16	85902734	85902950	IRF8	2.29765	2.60605	2.68511	Promoter
chr16	85913726	85914038	IRF8	2.59583	4.03637	3.10629	Promoter
chr17	10020120	10020445	GAS7	0.533342	3.39752	3.09258	Promoter
chr17	10114591	10115586	GAS7	5.21174	7.56369	10.5351	Promoter
chr17	34255038	34255303	CCL2	1.66473	1.7263	3.90586	Promoter
chr17	34319208	34319373	CCL2	0.975209	1.39828	3.55571	Promoter
chr19	33303129	33303259	CEBPa	2.29845	3.73026	6.83526	Promoter
chr19	33373481	33373682	CEBPa	3.28221	2.97501	5.39848	Promoter
chr20	23049582	23049886	CD93	1.76395	2.0517	4.00121	Promoter
chr20	23086276	23086513	CD93	1.51931	2.01773	3.0972	Promoter

## Sheet: Fig. 2f
Figure 2f. Comparison of the proportion of interactions of promoters, ppCBSs, and bCBSs with enhancers, promoters, and CBSs in iMac-specific gene loci.
Relative reads percentage in 0h peaks	CTCF	Enhancer	Promoter
Promoter viewpoint	0.52865407	0.40944864	0.06189729
ppCBS viewpoint	0.65294276	0.26165376	0.08540348
bCBS viewpoint	0.77911648	0.19184698	0.02903654
Relative reads percentage in 24h peaks	CTCF	Enhancer	Promoter
Promoter viewpoint	0.46798057	0.47510602	0.05691341
ppCBS viewpoint	0.60364432	0.31788657	0.07846912
bCBS viewpoint	0.74170736	0.22538726	0.03290538
Relative reads percentage in 96h peaks	CTCF	Enhancer	Promoter
Promoter viewpoint	0.45982623	0.49641813	0.04375564
ppCBS viewpoint	0.60554345	0.32930176	0.06515478
bCBS viewpoint	0.71093841	0.25226000	0.03680158

## Sheet: Fig. 2g
Figure 2g. Correlation between differential interaction frequencies between ppCBS-CBSs and differential cohesin binding levels.
differential interaction frequency	differential cohesin binding level	interaction type	label
1.66637	0.2369	ppCBS-CBS	24h vs 0h
1.65779	0.526537	ppCBS-CBS	24h vs 0h
1.55446	1.6938	ppCBS-CBS	24h vs 0h
1.55959	3.01174	ppCBS-CBS	24h vs 0h
1.12324	1.58285	ppCBS-CBS	24h vs 0h
0.615145	-0.0759712	ppCBS-CBS	24h vs 0h
0.0351851	-0.185697	ppCBS-CBS	24h vs 0h
-0.915432	-0.297412	ppCBS-CBS	24h vs 0h
-0.182384	0.167209	ppCBS-CBS	24h vs 0h
0.168175	0.166531	ppCBS-CBS	24h vs 0h
0.171518	0.160398	ppCBS-CBS	24h vs 0h
0.0797137	0.0116636	ppCBS-CBS	24h vs 0h
-0.0592442	-0.03941	ppCBS-CBS	24h vs 0h
0.670136	0.0403686	ppCBS-CBS	24h vs 0h
0.265478	0.104065	ppCBS-CBS	24h vs 0h
0.0220179	-0.385453	ppCBS-CBS	24h vs 0h
-0.175141	0.0826439	ppCBS-CBS	24h vs 0h
0.300117	0.0610572	ppCBS-CBS	24h vs 0h
0.200911	-0.126612	ppCBS-CBS	24h vs 0h
0.475731	0.48778	ppCBS-CBS	24h vs 0h
-0.144271	-0.0894255	ppCBS-CBS	24h vs 0h
-0.247341	-0.421696	ppCBS-CBS	24h vs 0h
-0.612974	0.106167	ppCBS-CBS	24h vs 0h
-0.0904265	-0.0671931	ppCBS-CBS	24h vs 0h
0.0846254	-0.00265001	ppCBS-CBS	24h vs 0h
-0.191997	0.191899	ppCBS-CBS	24h vs 0h
-0.198677	0.316252	ppCBS-CBS	24h vs 0h
-0.156153	-0.820547	ppCBS-CBS	24h vs 0h
-0.00432285	0.890412	ppCBS-CBS	24h vs 0h
0.370899	1.18836	ppCBS-CBS	24h vs 0h
-0.156926	1.13116	ppCBS-CBS	24h vs 0h
1.17943	0.915625	ppCBS-CBS	24h vs 0h
-0.203521	0.16284	ppCBS-CBS	24h vs 0h
-0.800304	-0.135616	ppCBS-CBS	24h vs 0h
1.1439	1.56879	ppCBS-CBS	24h vs 0h
-0.515777	-0.326564	ppCBS-CBS	24h vs 0h
0.0304116	0.369378	ppCBS-CBS	24h vs 0h
-0.093143	0.279437	ppCBS-CBS	24h vs 0h
0.185106	-0.0702443	ppCBS-CBS	24h vs 0h
0.616493	0.263021	ppCBS-CBS	24h vs 0h
0.452374	0.247345	ppCBS-CBS	24h vs 0h
-0.122745	-0.403897	ppCBS-CBS	24h vs 0h
-0.304169	0.633122	ppCBS-CBS	24h vs 0h
1.48295	1.07249	ppCBS-CBS	24h vs 0h
0.791928	2.54936	ppCBS-CBS	24h vs 0h
-0.548038	-0.265832	ppCBS-CBS	24h vs 0h
0.310018	0.4392	ppCBS-CBS	24h vs 0h
0.100726	0.0453134	ppCBS-CBS	24h vs 0h
0.755826	0.943331	ppCBS-CBS	24h vs 0h
1.01492	1.26329	ppCBS-CBS	24h vs 0h
0.651246	0.0388157	ppCBS-CBS	24h vs 0h
-0.234325	-0.820798	ppCBS-CBS	24h vs 0h
-0.273085	-0.543774	ppCBS-CBS	24h vs 0h
0.368485	0.435386	ppCBS-CBS	24h vs 0h
-0.574271	-0.274799	ppCBS-CBS	24h vs 0h
-0.229835	0.0671655	ppCBS-CBS	24h vs 0h
-0.37342	-0.266008	ppCBS-CBS	24h vs 0h
-0.787657	0.224388	ppCBS-CBS	24h vs 0h
0.246623	-0.197816	ppCBS-CBS	24h vs 0h
-0.1578	-0.809541	ppCBS-CBS	24h vs 0h
-0.769464	-1.4456	ppCBS-CBS	24h vs 0h
-0.896454	-1.94708	ppCBS-CBS	24h vs 0h
-0.526629	-0.912759	ppCBS-CBS	24h vs 0h
0.578843	0.646819	ppCBS-CBS	24h vs 0h
0.524954	-0.518296	ppCBS-CBS	24h vs 0h
-0.867606	-1.53209	ppCBS-CBS	24h vs 0h
0.38795	0.379467	ppCBS-CBS	24h vs 0h
-0.610716	-0.116239	ppCBS-CBS	24h vs 0h
-0.520642	-0.35988	ppCBS-CBS	24h vs 0h
-0.103666	-0.510919	ppCBS-CBS	24h vs 0h
-0.136641	-0.335633	ppCBS-CBS	24h vs 0h
-0.282502	-0.672464	ppCBS-CBS	24h vs 0h
-0.167372	0.427186	ppCBS-CBS	24h vs 0h
-0.193935	0.0370443	ppCBS-CBS	24h vs 0h
0.827529	0.575115	ppCBS-CBS	24h vs 0h
0.611667	0.604511	ppCBS-CBS	24h vs 0h
1.99966	2.17271	ppCBS-CBS	24h vs 0h
1.37956	4.42568	ppCBS-CBS	24h vs 0h
0.997469	2.02506	ppCBS-CBS	24h vs 0h
0.696304	2.09563	ppCBS-CBS	24h vs 0h
0.9164	3.32432	ppCBS-CBS	24h vs 0h
0.679964	0.804797	ppCBS-CBS	24h vs 0h
0.716681	0.501758	ppCBS-CBS	24h vs 0h
0.870446	0.487224	ppCBS-CBS	24h vs 0h
1.33345	2.49722	ppCBS-CBS	24h vs 0h
0.442474	0.664946	ppCBS-CBS	24h vs 0h
-0.0864865	0.410268	ppCBS-CBS	24h vs 0h
0.722154	0.648501	ppCBS-CBS	24h vs 0h
-0.0938977	-0.223519	ppCBS-CBS	24h vs 0h
1.27264	1.04305	ppCBS-CBS	24h vs 0h
-0.0689765	-0.315839	ppCBS-CBS	24h vs 0h
-0.103517	-0.0464154	ppCBS-CBS	24h vs 0h
1.52563	Inf	ppCBS-CBS	24h vs 0h
0.707477	1.06695	ppCBS-CBS	24h vs 0h
-0.037788	1.27997	ppCBS-CBS	24h vs 0h
1.2041	1.51228	ppCBS-CBS	24h vs 0h
0.582145	1.30212	ppCBS-CBS	24h vs 0h
0.740399	0.483638	ppCBS-CBS	24h vs 0h
0.548915	0.203098	ppCBS-CBS	24h vs 0h
0.593198	0.284199	ppCBS-CBS	24h vs 0h
-0.214858	-0.111379	ppCBS-CBS	24h vs 0h
-0.312617	-0.861316	ppCBS-CBS	24h vs 0h
0.0774551	0.151894	ppCBS-CBS	24h vs 0h
0.535618	0.916797	ppCBS-CBS	24h vs 0h
-0.345451	-0.206218	ppCBS-CBS	24h vs 0h
-0.0552144	0.133229	ppCBS-CBS	24h vs 0h
0.119475	-0.0516818	ppCBS-CBS	24h vs 0h
0.376794	0.214544	ppCBS-CBS	24h vs 0h
0.165967	0.078505	ppCBS-CBS	24h vs 0h
-0.128084	-0.239225	ppCBS-CBS	24h vs 0h
0.961691	0.313102	ppCBS-CBS	24h vs 0h
0.0521584	0.814757	ppCBS-CBS	24h vs 0h
-0.122673	0.0827935	ppCBS-CBS	24h vs 0h
0.347878	0.56621	ppCBS-CBS	24h vs 0h
0.367312	-0.0725322	ppCBS-CBS	24h vs 0h
1.11376	0.886019	ppCBS-CBS	24h vs 0h
1.52618	1.20255	ppCBS-CBS	24h vs 0h
0.941509	0.811681	ppCBS-CBS	24h vs 0h
2.46762	3.00675	ppCBS-CBS	24h vs 0h
1.73339	0.968341	ppCBS-CBS	24h vs 0h
1.8586	3.2448	ppCBS-CBS	24h vs 0h
-0.258522	-0.11281	ppCBS-CBS	24h vs 0h
0.476147	0.263016	ppCBS-CBS	24h vs 0h
-0.311458	0.713799	ppCBS-CBS	24h vs 0h
0.810128	0.416572	ppCBS-CBS	24h vs 0h
-0.718398	-0.214638	ppCBS-CBS	24h vs 0h
-0.724843	-0.198167	ppCBS-CBS	24h vs 0h
-1.15288	0.392416	ppCBS-CBS	24h vs 0h
-0.45009	-0.307793	ppCBS-CBS	24h vs 0h
-1.06198	-0.182429	ppCBS-CBS	24h vs 0h
-0.26237	0.0844874	ppCBS-CBS	24h vs 0h
0.637558	-0.0303968	ppCBS-CBS	24h vs 0h
0.421427	-0.129421	ppCBS-CBS	24h vs 0h
0.211523	-0.559758	ppCBS-CBS	24h vs 0h
0.303701	-0.0507873	ppCBS-CBS	24h vs 0h
0.277164	0.749805	ppCBS-CBS	24h vs 0h
0.607114	0.361117	ppCBS-CBS	24h vs 0h
0.541138	0.122401	ppCBS-CBS	24h vs 0h
0.362307	0.0260699	ppCBS-CBS	24h vs 0h
0.740601	0.548015	ppCBS-CBS	24h vs 0h
0.622335	1.06393	ppCBS-CBS	24h vs 0h
1.54104	2.28675	ppCBS-CBS	24h vs 0h
0.611468	2.40485	ppCBS-CBS	24h vs 0h
0.640153	1.65331	ppCBS-CBS	24h vs 0h
-0.128158	0.650081	ppCBS-CBS	24h vs 0h
0.424621	1.0363	ppCBS-CBS	24h vs 0h
-0.399964	0.773858	ppCBS-CBS	24h vs 0h
-0.0324012	0.108198	ppCBS-CBS	24h vs 0h
0.552492	-0.41373	ppCBS-CBS	24h vs 0h
0.351625	-0.0207491	ppCBS-CBS	24h vs 0h
1.18783	-0.20949	ppCBS-CBS	24h vs 0h
2.01034	-0.195225	ppCBS-CBS	24h vs 0h
-0.736859	-2.15731	ppCBS-CBS	24h vs 0h
1.19874	-0.781615	ppCBS-CBS	24h vs 0h
3.57441	0.415117	ppCBS-CBS	24h vs 0h
2.5162	-0.135333	ppCBS-CBS	24h vs 0h
3.00364	-0.592327	ppCBS-CBS	24h vs 0h
1.952	-0.266794	ppCBS-CBS	24h vs 0h
1.89493	0.257226	ppCBS-CBS	24h vs 0h
1.66498	1.02815	ppCBS-CBS	24h vs 0h
0.256503	-0.0945746	ppCBS-CBS	24h vs 0h
1.25767	0.316391	ppCBS-CBS	24h vs 0h
-1.15385	0.0567479	ppCBS-CBS	24h vs 0h
1.17928	1.47336	ppCBS-CBS	24h vs 0h
0.492295	0.0140347	ppCBS-CBS	24h vs 0h
0.401989	0.303148	ppCBS-CBS	24h vs 0h
-0.634907	0.254819	ppCBS-CBS	24h vs 0h
-0.502231	0.533095	ppCBS-CBS	24h vs 0h
-0.441024	-0.11136	ppCBS-CBS	24h vs 0h
-0.516277	0.0489726	ppCBS-CBS	24h vs 0h
0.126969	0.0379033	ppCBS-CBS	24h vs 0h
0.380382	0.659668	ppCBS-CBS	24h vs 0h
0.395332	-0.150572	ppCBS-CBS	24h vs 0h
1.9294	0.0404892	ppCBS-CBS	24h vs 0h
1.10924	0.46853	ppCBS-CBS	24h vs 0h
0.0104315	0.327928	ppCBS-CBS	24h vs 0h
1.12322	0.8466	ppCBS-CBS	24h vs 0h
0.106908	0.562427	ppCBS-CBS	24h vs 0h
0.840377	1.4776	ppCBS-CBS	24h vs 0h
4.13071	2.66249	ppCBS-CBS	24h vs 0h
1.57854	2.09598	ppCBS-CBS	24h vs 0h
2.24281	1.55802	ppCBS-CBS	24h vs 0h
0.556951	0.80076	ppCBS-CBS	24h vs 0h
0.480447	-0.158655	ppCBS-CBS	24h vs 0h
-0.00857791	0.46319	ppCBS-CBS	24h vs 0h
0.571221	0.167101	ppCBS-CBS	24h vs 0h
0.785561	0.113758	ppCBS-CBS	24h vs 0h
0.142934	0.111532	ppCBS-CBS	24h vs 0h
-0.0507374	0.970624	ppCBS-CBS	24h vs 0h
-0.24431	0.681788	ppCBS-CBS	24h vs 0h
0.686043	1.291	ppCBS-CBS	24h vs 0h
2.38162	-1.05552	ppCBS-CBS	24h vs 0h
0.558936	1.62363	ppCBS-CBS	24h vs 0h
1.08766	0.426159	ppCBS-CBS	24h vs 0h
0.159884	-0.196185	ppCBS-CBS	24h vs 0h
0.31031	0.499474	ppCBS-CBS	24h vs 0h
0.0578547	0.626923	ppCBS-CBS	24h vs 0h
-0.63545	0.339943	ppCBS-CBS	24h vs 0h
-0.676928	-0.688793	ppCBS-CBS	24h vs 0h
-0.767896	-0.263888	ppCBS-CBS	24h vs 0h
0.0191509	0.624799	ppCBS-CBS	24h vs 0h
0.763677	1.41529	ppCBS-CBS	24h vs 0h
0.110193	0.519495	ppCBS-CBS	24h vs 0h
1.43395	1.90847	ppCBS-CBS	24h vs 0h
0.664248	0.830544	ppCBS-CBS	24h vs 0h
0.297121	0.529292	ppCBS-CBS	24h vs 0h
0.712813	1.14156	ppCBS-CBS	24h vs 0h
0.52326	-0.0904393	ppCBS-CBS	24h vs 0h
3.39508	0.471296	ppCBS-CBS	24h vs 0h
1.80134	0.906391	ppCBS-CBS	24h vs 0h
-0.212247	-0.127512	ppCBS-CBS	24h vs 0h
-0.40826	-0.0720718	ppCBS-CBS	24h vs 0h
1.10516	0.118459	ppCBS-CBS	24h vs 0h
1.7667	1.13821	ppCBS-CBS	24h vs 0h
1.20258	-0.424943	ppCBS-CBS	24h vs 0h
1.59531	0.796298	ppCBS-CBS	24h vs 0h
0.899482	0.425542	ppCBS-CBS	24h vs 0h
0.377649	0.191241	ppCBS-CBS	24h vs 0h
-0.500275	-0.105416	ppCBS-CBS	24h vs 0h
0.277856	0.521774	ppCBS-CBS	24h vs 0h
0.604606	0.856852	ppCBS-CBS	24h vs 0h
0.63045	-0.554958	ppCBS-CBS	24h vs 0h
-1.6947	0.603685	ppCBS-CBS	24h vs 0h
0.853527	1.10416	ppCBS-CBS	24h vs 0h
2.56668	1.44672	ppCBS-CBS	24h vs 0h
2.53202	2.7004	ppCBS-CBS	24h vs 0h
2.06364	3.80468	ppCBS-CBS	24h vs 0h
1.36055	1.39814	ppCBS-CBS	24h vs 0h
-0.0809818	1.05211	ppCBS-CBS	24h vs 0h
0.218944	1.23112	ppCBS-CBS	24h vs 0h
-0.696759	0.468681	ppCBS-CBS	24h vs 0h
0.697028	1.81163	ppCBS-CBS	24h vs 0h
-0.18617	0.1175	ppCBS-CBS	24h vs 0h
0.531288	0.421994	ppCBS-CBS	24h vs 0h
0.152228	0.0812965	ppCBS-CBS	24h vs 0h
-0.0709835	-0.101018	ppCBS-CBS	24h vs 0h
0.59101	-0.0520963	ppCBS-CBS	24h vs 0h
0.655978	-0.214251	ppCBS-CBS	24h vs 0h
0.141017	-0.670188	ppCBS-CBS	24h vs 0h
-0.262474	1.15501	ppCBS-CBS	24h vs 0h
0.493222	-0.378585	ppCBS-CBS	24h vs 0h
1.34968	1.33274	ppCBS-CBS	24h vs 0h
4.40069	2.61837	ppCBS-CBS	24h vs 0h
0.187658	0.49127	ppCBS-CBS	24h vs 0h
0.0996393	0.310522	ppCBS-CBS	24h vs 0h
0.272712	0.486795	ppCBS-CBS	24h vs 0h
-0.92788	-0.0425408	ppCBS-CBS	24h vs 0h
-0.724728	-0.0766039	ppCBS-CBS	24h vs 0h
-0.55612	0.816126	ppCBS-CBS	24h vs 0h
-1.20654	0.0187783	ppCBS-CBS	24h vs 0h
-0.931722	0.190712	ppCBS-CBS	24h vs 0h
0.286072	0.968801	ppCBS-CBS	24h vs 0h
1.61559	2.41724	ppCBS-CBS	24h vs 0h
2.62187	2.90095	ppCBS-CBS	24h vs 0h
0.463127	1.05494	ppCBS-CBS	24h vs 0h
0.47864	0.874225	ppCBS-CBS	24h vs 0h
0.455072	0.405149	ppCBS-CBS	24h vs 0h
0.140867	0.421191	ppCBS-CBS	24h vs 0h
0.71449	0.632655	ppCBS-CBS	24h vs 0h
0.149047	0.593935	ppCBS-CBS	24h vs 0h
-0.223112	0.879558	ppCBS-CBS	24h vs 0h
0.648148	0.610491	ppCBS-CBS	24h vs 0h
0.881878	0.834005	ppCBS-CBS	24h vs 0h
0.818747	0.559021	ppCBS-CBS	24h vs 0h
0.0999981	0.60698	ppCBS-CBS	24h vs 0h
0.0836785	0.589303	ppCBS-CBS	24h vs 0h
0.120407	-0.00897829	ppCBS-CBS	24h vs 0h
-0.398255	0.257528	ppCBS-CBS	24h vs 0h
-0.121451	0.228512	ppCBS-CBS	24h vs 0h
-0.0225528	0.93444	ppCBS-CBS	24h vs 0h
-0.652285	-0.207117	ppCBS-CBS	24h vs 0h
0.427591	0.1587	ppCBS-CBS	24h vs 0h
0.962058	1.32666	ppCBS-CBS	24h vs 0h
0.477774	0.474644	ppCBS-CBS	24h vs 0h
0.0250009	0.560671	ppCBS-CBS	24h vs 0h
-0.598294	-0.0275565	ppCBS-CBS	24h vs 0h
-0.23325	0.110122	ppCBS-CBS	24h vs 0h
-0.240361	0.423588	ppCBS-CBS	24h vs 0h
0.330871	0.506266	ppCBS-CBS	24h vs 0h
-0.284459	0.0397654	ppCBS-CBS	24h vs 0h
-0.27477	-0.346376	ppCBS-CBS	24h vs 0h
0.0213968	-0.11488	ppCBS-CBS	24h vs 0h
-0.243074	-0.175803	ppCBS-CBS	24h vs 0h
-0.820644	0.2809	ppCBS-CBS	24h vs 0h
-0.0174007	0.0416846	ppCBS-CBS	24h vs 0h
0.195349	0.610261	ppCBS-CBS	24h vs 0h
0.0454003	0.00260862	ppCBS-CBS	24h vs 0h
0.562262	1.21258	ppCBS-CBS	24h vs 0h
-0.255631	-0.325672	ppCBS-CBS	24h vs 0h
0.277277	0.684576	ppCBS-CBS	24h vs 0h
0.249872	1.15178	ppCBS-CBS	24h vs 0h
0.292122	0.200272	ppCBS-CBS	24h vs 0h
0.625957	0.311477	ppCBS-CBS	24h vs 0h
0.837987	0.483934	ppCBS-CBS	24h vs 0h
0.316656	0.118456	ppCBS-CBS	24h vs 0h
0.623847	0.386399	ppCBS-CBS	24h vs 0h
-0.457356	0.609362	ppCBS-CBS	24h vs 0h
-0.382359	0.777947	ppCBS-CBS	24h vs 0h
0.430744	0.641254	ppCBS-CBS	24h vs 0h
-0.122705	0.869888	ppCBS-CBS	24h vs 0h
0.0863612	0.405538	ppCBS-CBS	24h vs 0h
-0.431355	0.11577	ppCBS-CBS	24h vs 0h
-0.629422	-0.187211	ppCBS-CBS	24h vs 0h
-0.502814	-0.108156	ppCBS-CBS	24h vs 0h
-0.0465592	0.151588	ppCBS-CBS	24h vs 0h
0.19298	0.700912	ppCBS-CBS	24h vs 0h
-0.492483	0.298256	ppCBS-CBS	24h vs 0h
-0.231056	0.305632	ppCBS-CBS	24h vs 0h
-0.350968	0.397292	ppCBS-CBS	24h vs 0h
0.0337226	0.383329	ppCBS-CBS	24h vs 0h
-0.108593	0.72332	ppCBS-CBS	24h vs 0h
0.333599	0.284666	ppCBS-CBS	24h vs 0h
-0.516995	-0.81553	ppCBS-CBS	24h vs 0h
0.406879	0.733444	ppCBS-CBS	24h vs 0h
-0.270059	0.364752	ppCBS-CBS	24h vs 0h
0.118745	0.825825	ppCBS-CBS	24h vs 0h
-0.0340731	0.389304	ppCBS-CBS	24h vs 0h
-0.402261	0.476757	ppCBS-CBS	24h vs 0h
-0.0764048	0.324966	ppCBS-CBS	24h vs 0h
-0.0359271	0.155207	ppCBS-CBS	24h vs 0h
-0.0429811	0.36182	ppCBS-CBS	24h vs 0h
4.10577	0.688767	ppCBS-CBS	24h vs 0h
0.48124	0.5273	ppCBS-CBS	24h vs 0h
1.52453	1.19084	ppCBS-CBS	24h vs 0h
1.42758	0.984867	ppCBS-CBS	24h vs 0h
0.0426956	0.334429	ppCBS-CBS	24h vs 0h
0.050456	0.232007	ppCBS-CBS	24h vs 0h
2.0006	0.271229	ppCBS-CBS	24h vs 0h
1.62328	0.183191	ppCBS-CBS	24h vs 0h
1.05289	-0.530337	ppCBS-CBS	24h vs 0h
1.3363	0.258263	ppCBS-CBS	24h vs 0h
0.293252	0.879192	ppCBS-CBS	24h vs 0h
0.918357	0.174205	ppCBS-CBS	24h vs 0h
0.81733	-0.846916	ppCBS-CBS	24h vs 0h
1.48859	0.829036	ppCBS-CBS	24h vs 0h
0.202021	0.945548	ppCBS-CBS	24h vs 0h
1.57758	0.292707	ppCBS-CBS	24h vs 0h
1.01446	0.091207	ppCBS-CBS	24h vs 0h
1.08554	0.259579	ppCBS-CBS	24h vs 0h
1.43843	1.59555	ppCBS-CBS	24h vs 0h
2.61587	2.80423	ppCBS-CBS	24h vs 0h
1.28763	1.21395	ppCBS-CBS	24h vs 0h
0.609581	1.11249	ppCBS-CBS	24h vs 0h
1.06428	1.02675	ppCBS-CBS	24h vs 0h
0.83386	0.600622	ppCBS-CBS	24h vs 0h
0.8209	0.010575	ppCBS-CBS	24h vs 0h
0.892161	0.388704	ppCBS-CBS	24h vs 0h
1.36077	0.161646	ppCBS-CBS	24h vs 0h
-0.0978131	0.494209	ppCBS-CBS	24h vs 0h
0.600311	0.484604	ppCBS-CBS	24h vs 0h
0.717901	1.28371	ppCBS-CBS	24h vs 0h
0.4634	0.292409	ppCBS-CBS	24h vs 0h
0.573897	0.989671	ppCBS-CBS	24h vs 0h
1.14538	1.70956	ppCBS-CBS	24h vs 0h
1.07	1.84191	ppCBS-CBS	24h vs 0h
1.55287	2.62298	ppCBS-CBS	24h vs 0h
0.754782	1.00801	ppCBS-CBS	24h vs 0h
0.857493	1.03145	ppCBS-CBS	24h vs 0h
0.468534	0.433824	ppCBS-CBS	24h vs 0h
0.402734	0.394525	ppCBS-CBS	24h vs 0h
1.01943	0.290719	ppCBS-CBS	24h vs 0h
0.129742	0.0189937	ppCBS-CBS	24h vs 0h
-0.345388	-0.380552	ppCBS-CBS	24h vs 0h
0.198122	-0.196953	ppCBS-CBS	24h vs 0h
0.25479	0.203575	ppCBS-CBS	24h vs 0h
-0.378616	-0.0641151	ppCBS-CBS	24h vs 0h
-0.154239	-0.129619	ppCBS-CBS	24h vs 0h
-0.472766	-0.18495	ppCBS-CBS	24h vs 0h
-1.16275	-1.08196	ppCBS-CBS	24h vs 0h
0.201367	-0.136683	ppCBS-CBS	24h vs 0h
-1.20479	-1.48721	ppCBS-CBS	24h vs 0h
0.56552	0.101974	ppCBS-CBS	24h vs 0h
0.832726	-0.21715	ppCBS-CBS	24h vs 0h
-0.00841261	-0.597099	ppCBS-CBS	24h vs 0h
1.01204	1.48962	ppCBS-CBS	24h vs 0h
-0.320055	-0.285263	ppCBS-CBS	24h vs 0h
-0.119824	0.470512	ppCBS-CBS	24h vs 0h
-0.280219	0.168316	ppCBS-CBS	24h vs 0h
-0.0395465	-0.00735416	ppCBS-CBS	24h vs 0h
0.12041	-0.029837	ppCBS-CBS	24h vs 0h
0.0740183	0.285532	ppCBS-CBS	24h vs 0h
0.36218	0.183795	ppCBS-CBS	24h vs 0h
0.531536	0.14702	ppCBS-CBS	24h vs 0h
0.725464	0.499043	ppCBS-CBS	24h vs 0h
-0.747595	0.406431	ppCBS-CBS	24h vs 0h
-0.104538	0.706264	ppCBS-CBS	24h vs 0h
-0.509853	0.605299	ppCBS-CBS	24h vs 0h
-0.40122	1.25063	ppCBS-CBS	24h vs 0h
0.121368	0.394198	ppCBS-CBS	24h vs 0h
0.676647	0.204171	ppCBS-CBS	24h vs 0h
0.64059	0.464934	ppCBS-CBS	24h vs 0h
0.376829	1.64885	ppCBS-CBS	24h vs 0h
2.94361	0.805378	ppCBS-CBS	24h vs 0h
0.973519	1.54555	ppCBS-CBS	24h vs 0h
1.87373	2.71638	ppCBS-CBS	24h vs 0h
0.0760594	1.29609	ppCBS-CBS	24h vs 0h
1.27514	1.21466	ppCBS-CBS	24h vs 0h
1.55862	1.0356	ppCBS-CBS	24h vs 0h
0.505483	1.87507	ppCBS-CBS	24h vs 0h
1.54092	0.459669	ppCBS-CBS	24h vs 0h
0.313616	0.406506	ppCBS-CBS	24h vs 0h
-0.245681	0.00711104	ppCBS-CBS	24h vs 0h
-0.0856638	0.202792	ppCBS-CBS	24h vs 0h
0.0224271	0.261548	ppCBS-CBS	24h vs 0h
0.521838	-0.394465	ppCBS-CBS	24h vs 0h
0.160995	0.743396	ppCBS-CBS	24h vs 0h
-0.0222282	0.827141	ppCBS-CBS	24h vs 0h
-0.234121	0.797069	ppCBS-CBS	24h vs 0h
1.25954	0.900589	ppCBS-CBS	24h vs 0h
1.48695	1.3257	ppCBS-CBS	24h vs 0h
0.468198	1.11523	ppCBS-CBS	24h vs 0h
3.16041	2.7206	ppCBS-CBS	24h vs 0h
0.259499	1.05286	ppCBS-CBS	24h vs 0h
3.2074	5.37923	ppCBS-CBS	24h vs 0h
0.319477	0.780121	ppCBS-CBS	24h vs 0h
0.383144	0.36681	ppCBS-CBS	24h vs 0h
0.286031	0.400513	ppCBS-CBS	24h vs 0h
-0.0667986	0.169688	ppCBS-CBS	24h vs 0h
0.0694345	0.400751	ppCBS-CBS	24h vs 0h
-1.27041	0.348579	ppCBS-CBS	24h vs 0h
-1.03465	-0.862874	ppCBS-CBS	24h vs 0h
-1.09488	-1.3459	ppCBS-CBS	24h vs 0h
-0.320809	-0.813189	ppCBS-CBS	24h vs 0h
0.297618	-0.41043	ppCBS-CBS	24h vs 0h
0.214175	-0.293129	ppCBS-CBS	24h vs 0h
0.676185	0.150598	ppCBS-CBS	24h vs 0h
0.0116948	-0.49328	ppCBS-CBS	24h vs 0h
-0.041979	-0.408216	ppCBS-CBS	24h vs 0h
-0.341528	-0.38733	ppCBS-CBS	24h vs 0h
0.339209	-0.000892144	ppCBS-CBS	24h vs 0h
-0.315768	-0.372955	ppCBS-CBS	24h vs 0h
-0.0300017	-0.257856	ppCBS-CBS	24h vs 0h
-0.165301	-0.109017	ppCBS-CBS	24h vs 0h
-0.1929	-0.410248	ppCBS-CBS	24h vs 0h
-0.257911	-0.380171	ppCBS-CBS	24h vs 0h
-0.25925	-0.337975	ppCBS-CBS	24h vs 0h
-0.604809	-0.438994	ppCBS-CBS	24h vs 0h
-0.54947	-0.0068842	ppCBS-CBS	24h vs 0h
-0.0899039	-0.174239	ppCBS-CBS	24h vs 0h
0.150544	-0.232399	ppCBS-CBS	24h vs 0h
-0.618759	-0.482593	ppCBS-CBS	24h vs 0h
-0.040967	-0.218271	ppCBS-CBS	24h vs 0h
-1.01498	-0.946454	ppCBS-CBS	24h vs 0h
-0.0122202	-0.237082	ppCBS-CBS	24h vs 0h
0.418025	0.402987	ppCBS-CBS	24h vs 0h
-0.105066	-0.487666	ppCBS-CBS	24h vs 0h
-0.360153	-0.0658382	ppCBS-CBS	24h vs 0h
0.0121531	-0.852841	ppCBS-CBS	24h vs 0h
-0.062577	-1.08518	ppCBS-CBS	24h vs 0h
-0.45081	-1.09633	ppCBS-CBS	24h vs 0h
-0.111521	-0.688885	ppCBS-CBS	24h vs 0h
-0.0382546	-0.115996	ppCBS-CBS	24h vs 0h
-0.377648	-0.143589	ppCBS-CBS	24h vs 0h
-0.0633577	0.049431	ppCBS-CBS	24h vs 0h
-0.194638	-0.0278635	ppCBS-CBS	24h vs 0h
-0.0806356	0.0314407	ppCBS-CBS	24h vs 0h
2.50777	0.321216	ppCBS-CBS	96h vs 0h
3.62875	0.79882	ppCBS-CBS	96h vs 0h
2.96881	3.52886	ppCBS-CBS	96h vs 0h
3.01183	3.46721	ppCBS-CBS	96h vs 0h
2.33493	2.11525	ppCBS-CBS	96h vs 0h
1.84873	-0.269415	ppCBS-CBS	96h vs 0h
-0.384639	-0.0195618	ppCBS-CBS	96h vs 0h
-2.56373	-0.817888	ppCBS-CBS	96h vs 0h
-1.12708	0.384223	ppCBS-CBS	96h vs 0h
-0.218708	0.197081	ppCBS-CBS	96h vs 0h
0.669543	0.532371	ppCBS-CBS	96h vs 0h
1.10006	0.567492	ppCBS-CBS	96h vs 0h
0.699557	-0.132307	ppCBS-CBS	96h vs 0h
0.783671	1.08745	ppCBS-CBS	96h vs 0h
1.08154	0.373815	ppCBS-CBS	96h vs 0h
1.143	0.0820901	ppCBS-CBS	96h vs 0h
-0.15368	0.765605	ppCBS-CBS	96h vs 0h
1.12608	0.0919098	ppCBS-CBS	96h vs 0h
0.319827	-0.972237	ppCBS-CBS	96h vs 0h
1.2468	0.00276297	ppCBS-CBS	96h vs 0h
1.46524	0.647273	ppCBS-CBS	96h vs 0h
0.231891	-0.399066	ppCBS-CBS	96h vs 0h
-0.827632	-0.114362	ppCBS-CBS	96h vs 0h
-0.375471	-0.128492	ppCBS-CBS	96h vs 0h
-0.394138	0.405075	ppCBS-CBS	96h vs 0h
-0.437691	0.272086	ppCBS-CBS	96h vs 0h
-0.494794	0.37171	ppCBS-CBS	96h vs 0h
-0.194847	-0.77066	ppCBS-CBS	96h vs 0h
0.0448731	0.999802	ppCBS-CBS	96h vs 0h
1.01619	2.11176	ppCBS-CBS	96h vs 0h
-0.188178	1.39078	ppCBS-CBS	96h vs 0h
1.39559	1.26727	ppCBS-CBS	96h vs 0h
-1.5041	0.29714	ppCBS-CBS	96h vs 0h
-0.693389	-0.707859	ppCBS-CBS	96h vs 0h
0.87139	1.77274	ppCBS-CBS	96h vs 0h
-1.00652	0.575782	ppCBS-CBS	96h vs 0h
1.00443	0.955483	ppCBS-CBS	96h vs 0h
0.555566	0.34684	ppCBS-CBS	96h vs 0h
1.14222	0.474594	ppCBS-CBS	96h vs 0h
1.78206	0.751282	ppCBS-CBS	96h vs 0h
1.35906	0.367625	ppCBS-CBS	96h vs 0h
0.0356624	-0.0279729	ppCBS-CBS	96h vs 0h
0.68864	1.58121	ppCBS-CBS	96h vs 0h
2.08849	1.46962	ppCBS-CBS	96h vs 0h
1.13105	3.03031	ppCBS-CBS	96h vs 0h
-0.72672	-0.0798021	ppCBS-CBS	96h vs 0h
0.604984	0.76242	ppCBS-CBS	96h vs 0h
0.487462	-0.0251026	ppCBS-CBS	96h vs 0h
1.3211	0.668751	ppCBS-CBS	96h vs 0h
1.47168	0.740055	ppCBS-CBS	96h vs 0h
0.0614676	0.779994	ppCBS-CBS	96h vs 0h
0.109424	-0.363027	ppCBS-CBS	96h vs 0h
-0.646792	-0.929395	ppCBS-CBS	96h vs 0h
0.674729	0.712778	ppCBS-CBS	96h vs 0h
-0.619835	-0.241122	ppCBS-CBS	96h vs 0h
-0.195316	0.115168	ppCBS-CBS	96h vs 0h
-0.21798	-0.360861	ppCBS-CBS	96h vs 0h
-1.07866	-1.25082	ppCBS-CBS	96h vs 0h
0.803991	0.075576	ppCBS-CBS	96h vs 0h
0.0276607	-0.647721	ppCBS-CBS	96h vs 0h
-0.898299	-1.86926	ppCBS-CBS	96h vs 0h
-0.983156	-2.98462	ppCBS-CBS	96h vs 0h
-0.967203	-1.32984	ppCBS-CBS	96h vs 0h
0.705989	0.947181	ppCBS-CBS	96h vs 0h
1.46517	0.918994	ppCBS-CBS	96h vs 0h
-1.77263	-2.39696	ppCBS-CBS	96h vs 0h
2.2475	2.43429	ppCBS-CBS	96h vs 0h
-0.36637	-0.337679	ppCBS-CBS	96h vs 0h
1.24195	1.03443	ppCBS-CBS	96h vs 0h
-0.293267	-0.70648	ppCBS-CBS	96h vs 0h
0.145642	-0.305982	ppCBS-CBS	96h vs 0h
-0.377172	-0.706849	ppCBS-CBS	96h vs 0h
0.108543	0.79428	ppCBS-CBS	96h vs 0h
0.167755	0.053055	ppCBS-CBS	96h vs 0h
1.21307	1.05162	ppCBS-CBS	96h vs 0h
0.624728	0.715513	ppCBS-CBS	96h vs 0h
3.14965	3.06544	ppCBS-CBS	96h vs 0h
2.44309	7.16363	ppCBS-CBS	96h vs 0h
1.43477	2.75474	ppCBS-CBS	96h vs 0h
0.958355	3.10827	ppCBS-CBS	96h vs 0h
1.75095	4.19337	ppCBS-CBS	96h vs 0h
2.19263	4.10113	ppCBS-CBS	96h vs 0h
1.0669	0.189099	ppCBS-CBS	96h vs 0h
2.19212	2.69903	ppCBS-CBS	96h vs 0h
2.50812	3.52952	ppCBS-CBS	96h vs 0h
1.20055	1.49612	ppCBS-CBS	96h vs 0h
0.250064	0.679274	ppCBS-CBS	96h vs 0h
1.73552	1.34166	ppCBS-CBS	96h vs 0h
1.01979	0.885335	ppCBS-CBS	96h vs 0h
3.48196	3.90593	ppCBS-CBS	96h vs 0h
0.670387	-0.636273	ppCBS-CBS	96h vs 0h
0.272546	0.0458278	ppCBS-CBS	96h vs 0h
1.36738	Inf	ppCBS-CBS	96h vs 0h
1.35308	1.79027	ppCBS-CBS	96h vs 0h
0.524582	1.26504	ppCBS-CBS	96h vs 0h
1.04425	2.17783	ppCBS-CBS	96h vs 0h
0.860452	1.82625	ppCBS-CBS	96h vs 0h
0.018779	-0.113085	ppCBS-CBS	96h vs 0h
0.010814	0.460326	ppCBS-CBS	96h vs 0h
0.621731	0.420614	ppCBS-CBS	96h vs 0h
-0.840577	-0.0909944	ppCBS-CBS	96h vs 0h
-0.715225	-1.01304	ppCBS-CBS	96h vs 0h
0.436253	0.586834	ppCBS-CBS	96h vs 0h
1.37678	1.49573	ppCBS-CBS	96h vs 0h
-0.778282	-0.195446	ppCBS-CBS	96h vs 0h
-0.308146	-0.0786867	ppCBS-CBS	96h vs 0h
-0.310857	-0.171258	ppCBS-CBS	96h vs 0h
-0.861385	-0.0652626	ppCBS-CBS	96h vs 0h
0.391307	0.546098	ppCBS-CBS	96h vs 0h
0.485617	-0.103997	ppCBS-CBS	96h vs 0h
0.49387	0.659282	ppCBS-CBS	96h vs 0h
0.661009	0.715551	ppCBS-CBS	96h vs 0h
1.23389	1.49931	ppCBS-CBS	96h vs 0h
1.30914	1.00685	ppCBS-CBS	96h vs 0h
2.75199	3.45879	ppCBS-CBS	96h vs 0h
1.95226	1.031	ppCBS-CBS	96h vs 0h
2.52227	1.7046	ppCBS-CBS	96h vs 0h
1.05681	1.60791	ppCBS-CBS	96h vs 0h
4.31148	4.53828	ppCBS-CBS	96h vs 0h
2.61073	2.58693	ppCBS-CBS	96h vs 0h
3.11809	4.68934	ppCBS-CBS	96h vs 0h
-0.716432	0.0939998	ppCBS-CBS	96h vs 0h
1.16205	0.613107	ppCBS-CBS	96h vs 0h
0.367243	1.7258	ppCBS-CBS	96h vs 0h
0.315533	0.605963	ppCBS-CBS	96h vs 0h
0.767045	0.0542276	ppCBS-CBS	96h vs 0h
-0.0461482	-0.178363	ppCBS-CBS	96h vs 0h
-0.49557	0.612029	ppCBS-CBS	96h vs 0h
0.287665	-0.575647	ppCBS-CBS	96h vs 0h
-0.329102	-0.427679	ppCBS-CBS	96h vs 0h
-0.769841	-0.343731	ppCBS-CBS	96h vs 0h
-0.261848	-0.119743	ppCBS-CBS	96h vs 0h
-0.319375	-0.115737	ppCBS-CBS	96h vs 0h
-0.137545	-0.118498	ppCBS-CBS	96h vs 0h
0.076984	-0.356532	ppCBS-CBS	96h vs 0h
0.0160993	0.0452052	ppCBS-CBS	96h vs 0h
-0.115375	0.521098	ppCBS-CBS	96h vs 0h
0.300058	-0.148702	ppCBS-CBS	96h vs 0h
0.207823	-0.173555	ppCBS-CBS	96h vs 0h
1.20898	0.816562	ppCBS-CBS	96h vs 0h
1.5482	1.90048	ppCBS-CBS	96h vs 0h
3.22814	4.10971	ppCBS-CBS	96h vs 0h
1.39805	3.76862	ppCBS-CBS	96h vs 0h
1.21425	2.58162	ppCBS-CBS	96h vs 0h
0.09324	0.63654	ppCBS-CBS	96h vs 0h
1.0331	1.71305	ppCBS-CBS	96h vs 0h
0.531722	1.10879	ppCBS-CBS	96h vs 0h
0.771315	0.129241	ppCBS-CBS	96h vs 0h
0.647228	-0.127514	ppCBS-CBS	96h vs 0h
0.71827	-0.248557	ppCBS-CBS	96h vs 0h
1.90728	-0.0160469	ppCBS-CBS	96h vs 0h
2.31951	-0.351336	ppCBS-CBS	96h vs 0h
-2.00881	-3.12851	ppCBS-CBS	96h vs 0h
1.80102	-0.753544	ppCBS-CBS	96h vs 0h
4.4201	0.853269	ppCBS-CBS	96h vs 0h
3.15983	0.228138	ppCBS-CBS	96h vs 0h
3.45415	-0.66595	ppCBS-CBS	96h vs 0h
4.2811	0.782301	ppCBS-CBS	96h vs 0h
2.95244	1.24965	ppCBS-CBS	96h vs 0h
2.98153	2.20603	ppCBS-CBS	96h vs 0h
0.537267	-0.00329027	ppCBS-CBS	96h vs 0h
-0.381804	0.772624	ppCBS-CBS	96h vs 0h
-1.10758	1.14021	ppCBS-CBS	96h vs 0h
1.0518	2.00346	ppCBS-CBS	96h vs 0h
0.0882009	0.409615	ppCBS-CBS	96h vs 0h
0.077458	0.366711	ppCBS-CBS	96h vs 0h
-0.301588	0.991085	ppCBS-CBS	96h vs 0h
-1.03158	0.93512	ppCBS-CBS	96h vs 0h
-0.52775	0.631379	ppCBS-CBS	96h vs 0h
0.457562	1.17865	ppCBS-CBS	96h vs 0h
1.57814	1.87392	ppCBS-CBS	96h vs 0h
3.14152	3.40035	ppCBS-CBS	96h vs 0h
1.17685	1.142	ppCBS-CBS	96h vs 0h
2.86056	0.0731355	ppCBS-CBS	96h vs 0h
0.735093	0.527489	ppCBS-CBS	96h vs 0h
0.998797	0.709087	ppCBS-CBS	96h vs 0h
3.29811	1.57882	ppCBS-CBS	96h vs 0h
1.74627	0.670291	ppCBS-CBS	96h vs 0h
0.848502	1.84639	ppCBS-CBS	96h vs 0h
5.3319	4.09859	ppCBS-CBS	96h vs 0h
2.75134	3.09893	ppCBS-CBS	96h vs 0h
3.77196	2.39492	ppCBS-CBS	96h vs 0h
1.28497	1.17497	ppCBS-CBS	96h vs 0h
0.532205	0.254439	ppCBS-CBS	96h vs 0h
0.6364	0.508722	ppCBS-CBS	96h vs 0h
0.942638	0.699194	ppCBS-CBS	96h vs 0h
0.906129	-0.0955338	ppCBS-CBS	96h vs 0h
0.152614	0.436303	ppCBS-CBS	96h vs 0h
2.5349	2.33044	ppCBS-CBS	96h vs 0h
2.06856	1.97478	ppCBS-CBS	96h vs 0h
2.40297	2.03082	ppCBS-CBS	96h vs 0h
4.92836	2.57039	ppCBS-CBS	96h vs 0h
2.50727	3.12778	ppCBS-CBS	96h vs 0h
3.39838	1.51442	ppCBS-CBS	96h vs 0h
-0.603797	0.257522	ppCBS-CBS	96h vs 0h
-0.258378	0.0167659	ppCBS-CBS	96h vs 0h
0.498424	1.39515	ppCBS-CBS	96h vs 0h
-1.78509	-0.0167835	ppCBS-CBS	96h vs 0h
-1.31235	-0.438491	ppCBS-CBS	96h vs 0h
0.0388904	0.431218	ppCBS-CBS	96h vs 0h
0.397331	1.63343	ppCBS-CBS	96h vs 0h
2.25066	3.24663	ppCBS-CBS	96h vs 0h
-0.619521	0.0775942	ppCBS-CBS	96h vs 0h
2.01482	2.03118	ppCBS-CBS	96h vs 0h
1.05367	1.34077	ppCBS-CBS	96h vs 0h
0.507924	0.480239	ppCBS-CBS	96h vs 0h
0.920708	1.08273	ppCBS-CBS	96h vs 0h
0.255415	0.475444	ppCBS-CBS	96h vs 0h
3.1355	0.518312	ppCBS-CBS	96h vs 0h
2.38584	1.47047	ppCBS-CBS	96h vs 0h
-0.104891	-0.517198	ppCBS-CBS	96h vs 0h
0.0259616	0.204684	ppCBS-CBS	96h vs 0h
1.71689	1.06149	ppCBS-CBS	96h vs 0h
1.63976	1.69419	ppCBS-CBS	96h vs 0h
0.477462	-0.62794	ppCBS-CBS	96h vs 0h
1.65629	1.03001	ppCBS-CBS	96h vs 0h
2.45323	1.03417	ppCBS-CBS	96h vs 0h
3.15142	0.456668	ppCBS-CBS	96h vs 0h
0.766301	-0.0314859	ppCBS-CBS	96h vs 0h
1.37417	1.27982	ppCBS-CBS	96h vs 0h
1.61642	1.09104	ppCBS-CBS	96h vs 0h
1.69371	-0.118851	ppCBS-CBS	96h vs 0h
-0.720023	1.18202	ppCBS-CBS	96h vs 0h
1.17309	1.68896	ppCBS-CBS	96h vs 0h
3.79725	2.29507	ppCBS-CBS	96h vs 0h
4.33217	4.03771	ppCBS-CBS	96h vs 0h
3.07233	4.07897	ppCBS-CBS	96h vs 0h
3.09693	3.17519	ppCBS-CBS	96h vs 0h
0.334221	1.82568	ppCBS-CBS	96h vs 0h
0.268011	1.02617	ppCBS-CBS	96h vs 0h
-0.376519	0.786018	ppCBS-CBS	96h vs 0h
1.27216	2.17448	ppCBS-CBS	96h vs 0h
0.326944	-0.0428569	ppCBS-CBS	96h vs 0h
0.750977	0.552035	ppCBS-CBS	96h vs 0h
0.743917	0.208762	ppCBS-CBS	96h vs 0h
0.612715	0.957188	ppCBS-CBS	96h vs 0h
0.928445	-0.065517	ppCBS-CBS	96h vs 0h
1.44844	1.55174	ppCBS-CBS	96h vs 0h
0.67939	-0.442844	ppCBS-CBS	96h vs 0h
1.49986	2.77304	ppCBS-CBS	96h vs 0h
0.508029	-0.0773314	ppCBS-CBS	96h vs 0h
1.2039	2.0984	ppCBS-CBS	96h vs 0h
6.08594	5.12618	ppCBS-CBS	96h vs 0h
0.619966	1.14363	ppCBS-CBS	96h vs 0h
1.21069	0.97843	ppCBS-CBS	96h vs 0h
1.2981	1.21641	ppCBS-CBS	96h vs 0h
-2.17858	0.457766	ppCBS-CBS	96h vs 0h
-1.5936	-0.368045	ppCBS-CBS	96h vs 0h
-1.15598	1.04747	ppCBS-CBS	96h vs 0h
-1.77117	-0.0794422	ppCBS-CBS	96h vs 0h
-0.937149	0.00279884	ppCBS-CBS	96h vs 0h
0.58063	1.151	ppCBS-CBS	96h vs 0h
2.52327	3.20138	ppCBS-CBS	96h vs 0h
2.58103	2.42543	ppCBS-CBS	96h vs 0h
1.06943	1.11478	ppCBS-CBS	96h vs 0h
0.468505	0.96632	ppCBS-CBS	96h vs 0h
-0.458075	0.221428	ppCBS-CBS	96h vs 0h
-0.464397	0.0425921	ppCBS-CBS	96h vs 0h
-0.179469	-0.292495	ppCBS-CBS	96h vs 0h
0.677546	0.579624	ppCBS-CBS	96h vs 0h
-0.831131	0.805795	ppCBS-CBS	96h vs 0h
1.079	0.862515	ppCBS-CBS	96h vs 0h
1.62752	1.0881	ppCBS-CBS	96h vs 0h
1.26679	0.677014	ppCBS-CBS	96h vs 0h
1.09656	1.09069	ppCBS-CBS	96h vs 0h
1.18787	0.571098	ppCBS-CBS	96h vs 0h
0.301777	-0.00379376	ppCBS-CBS	96h vs 0h
0.796756	0.00140478	ppCBS-CBS	96h vs 0h
0.433816	0.574455	ppCBS-CBS	96h vs 0h
0.756662	1.0439	ppCBS-CBS	96h vs 0h
-0.729283	-0.329076	ppCBS-CBS	96h vs 0h
1.5859	0.920401	ppCBS-CBS	96h vs 0h
2.21224	1.60623	ppCBS-CBS	96h vs 0h
0.760578	0.149232	ppCBS-CBS	96h vs 0h
0.83624	0.253272	ppCBS-CBS	96h vs 0h
0.429953	-0.232908	ppCBS-CBS	96h vs 0h
0.639088	-0.104235	ppCBS-CBS	96h vs 0h
0.0539477	0.128924	ppCBS-CBS	96h vs 0h
1.27261	0.815142	ppCBS-CBS	96h vs 0h
-0.852907	-0.117591	ppCBS-CBS	96h vs 0h
-0.579356	-0.0322386	ppCBS-CBS	96h vs 0h
0.185239	-0.107577	ppCBS-CBS	96h vs 0h
-0.468985	-0.210617	ppCBS-CBS	96h vs 0h
-0.152902	0.438639	ppCBS-CBS	96h vs 0h
0.358017	0.411648	ppCBS-CBS	96h vs 0h
0.542155	0.625472	ppCBS-CBS	96h vs 0h
0.180038	0.285981	ppCBS-CBS	96h vs 0h
0.917082	1.133	ppCBS-CBS	96h vs 0h
-0.373365	-0.542321	ppCBS-CBS	96h vs 0h
1.11488	1.38596	ppCBS-CBS	96h vs 0h
1.00684	1.87165	ppCBS-CBS	96h vs 0h
0.58864	0.916633	ppCBS-CBS	96h vs 0h
0.934136	0.994649	ppCBS-CBS	96h vs 0h
1.2125	1.34971	ppCBS-CBS	96h vs 0h
0.790099	0.0900259	ppCBS-CBS	96h vs 0h
0.338969	0.138863	ppCBS-CBS	96h vs 0h
0.241078	0.356196	ppCBS-CBS	96h vs 0h
-0.408224	1.00088	ppCBS-CBS	96h vs 0h
0.865931	1.41544	ppCBS-CBS	96h vs 0h
1.07323	1.32033	ppCBS-CBS	96h vs 0h
-0.264656	0.390387	ppCBS-CBS	96h vs 0h
-0.929272	0.473812	ppCBS-CBS	96h vs 0h
-0.775548	0.134147	ppCBS-CBS	96h vs 0h
-0.627537	0.553638	ppCBS-CBS	96h vs 0h
-0.638509	0.477886	ppCBS-CBS	96h vs 0h
-0.30504	0.645032	ppCBS-CBS	96h vs 0h
-0.354701	0.0858251	ppCBS-CBS	96h vs 0h
-0.429283	0.718304	ppCBS-CBS	96h vs 0h
-0.0988425	0.55337	ppCBS-CBS	96h vs 0h
0.585753	1.83973	ppCBS-CBS	96h vs 0h
0.0368025	1.09236	ppCBS-CBS	96h vs 0h
1.32235	0.775498	ppCBS-CBS	96h vs 0h
-0.0185646	-0.239255	ppCBS-CBS	96h vs 0h
1.12572	1.4011	ppCBS-CBS	96h vs 0h
-0.193524	0.961507	ppCBS-CBS	96h vs 0h
0.213591	1.42395	ppCBS-CBS	96h vs 0h
0.884319	0.740245	ppCBS-CBS	96h vs 0h
1.06047	1.27266	ppCBS-CBS	96h vs 0h
1.86893	0.833539	ppCBS-CBS	96h vs 0h
2.02283	0.680694	ppCBS-CBS	96h vs 0h
1.35819	0.88146	ppCBS-CBS	96h vs 0h
5.92193	2.58853	ppCBS-CBS	96h vs 0h
1.89914	0.265881	ppCBS-CBS	96h vs 0h
2.61466	1.64999	ppCBS-CBS	96h vs 0h
3.35022	3.58566	ppCBS-CBS	96h vs 0h
1.12209	0.770536	ppCBS-CBS	96h vs 0h
1.50801	0.737531	ppCBS-CBS	96h vs 0h
2.93731	1.08019	ppCBS-CBS	96h vs 0h
1.57011	0.11515	ppCBS-CBS	96h vs 0h
0.570472	-0.663114	ppCBS-CBS	96h vs 0h
1.36187	0.441136	ppCBS-CBS	96h vs 0h
1.82292	1.72693	ppCBS-CBS	96h vs 0h
1.05531	0.277306	ppCBS-CBS	96h vs 0h
0.19317	-1.12393	ppCBS-CBS	96h vs 0h
2.36924	1.89498	ppCBS-CBS	96h vs 0h
2.00891	1.00745	ppCBS-CBS	96h vs 0h
2.24826	0.505853	ppCBS-CBS	96h vs 0h
1.15047	-0.0777921	ppCBS-CBS	96h vs 0h
2.01283	0.83261	ppCBS-CBS	96h vs 0h
2.11107	1.75658	ppCBS-CBS	96h vs 0h
2.86016	2.0739	ppCBS-CBS	96h vs 0h
1.99277	1.52656	ppCBS-CBS	96h vs 0h
1.79847	0.786274	ppCBS-CBS	96h vs 0h
1.73439	1.28451	ppCBS-CBS	96h vs 0h
1.67785	0.477617	ppCBS-CBS	96h vs 0h
1.55315	0.0247067	ppCBS-CBS	96h vs 0h
1.5288	0.583889	ppCBS-CBS	96h vs 0h
2.18112	0.86933	ppCBS-CBS	96h vs 0h
0.302988	0.360234	ppCBS-CBS	96h vs 0h
1.0336	0.226761	ppCBS-CBS	96h vs 0h
0.768466	0.82122	ppCBS-CBS	96h vs 0h
0.572903	-0.7121	ppCBS-CBS	96h vs 0h
1.23184	-0.331113	ppCBS-CBS	96h vs 0h
1.79996	0.846705	ppCBS-CBS	96h vs 0h
2.58803	2.30435	ppCBS-CBS	96h vs 0h
2.12373	2.89087	ppCBS-CBS	96h vs 0h
0.921521	0.555362	ppCBS-CBS	96h vs 0h
1.35781	0.398821	ppCBS-CBS	96h vs 0h
0.927744	0.0677231	ppCBS-CBS	96h vs 0h
1.31198	0.57994	ppCBS-CBS	96h vs 0h
1.83408	0.457766	ppCBS-CBS	96h vs 0h
-0.595003	0.746026	ppCBS-CBS	96h vs 0h
-0.251118	-0.386755	ppCBS-CBS	96h vs 0h
0.266073	-0.0987076	ppCBS-CBS	96h vs 0h
0.0475109	0.524011	ppCBS-CBS	96h vs 0h
-0.805218	0.0519535	ppCBS-CBS	96h vs 0h
0.135657	-0.529284	ppCBS-CBS	96h vs 0h
-0.934833	-0.99558	ppCBS-CBS	96h vs 0h
-1.68127	-1.32906	ppCBS-CBS	96h vs 0h
0.425216	-0.378496	ppCBS-CBS	96h vs 0h
-1.95564	-3.28909	ppCBS-CBS	96h vs 0h
0.864165	-0.00932614	ppCBS-CBS	96h vs 0h
2.14106	0.998779	ppCBS-CBS	96h vs 0h
0.767437	-0.408054	ppCBS-CBS	96h vs 0h
1.63607	1.91638	ppCBS-CBS	96h vs 0h
-0.105095	-0.591035	ppCBS-CBS	96h vs 0h
-0.328041	-0.126877	ppCBS-CBS	96h vs 0h
-0.256683	0.207291	ppCBS-CBS	96h vs 0h
0.175748	0.0489233	ppCBS-CBS	96h vs 0h
0.581552	0.304233	ppCBS-CBS	96h vs 0h
0.0433544	0.529308	ppCBS-CBS	96h vs 0h
0.883707	1.26651	ppCBS-CBS	96h vs 0h
1.2963	0.757188	ppCBS-CBS	96h vs 0h
1.25602	1.35016	ppCBS-CBS	96h vs 0h
-0.795826	0.353085	ppCBS-CBS	96h vs 0h
-0.905073	0.481586	ppCBS-CBS	96h vs 0h
-0.793395	0.442638	ppCBS-CBS	96h vs 0h
-0.600367	1.27142	ppCBS-CBS	96h vs 0h
0.367056	0.295037	ppCBS-CBS	96h vs 0h
1.93728	0.387125	ppCBS-CBS	96h vs 0h
2.25455	0.319421	ppCBS-CBS	96h vs 0h
2.7699	2.87425	ppCBS-CBS	96h vs 0h
4.17282	1.71811	ppCBS-CBS	96h vs 0h
2.15956	1.0526	ppCBS-CBS	96h vs 0h
3.20703	3.56807	ppCBS-CBS	96h vs 0h
2.12449	3.16024	ppCBS-CBS	96h vs 0h
2.76963	1.26736	ppCBS-CBS	96h vs 0h
3.21046	1.39318	ppCBS-CBS	96h vs 0h
2.56717	2.08542	ppCBS-CBS	96h vs 0h
3.06037	0.743808	ppCBS-CBS	96h vs 0h
0.323365	0.0608608	ppCBS-CBS	96h vs 0h
0.344607	0.777684	ppCBS-CBS	96h vs 0h
0.211916	0.927258	ppCBS-CBS	96h vs 0h
0.426478	0.73316	ppCBS-CBS	96h vs 0h
0.938891	1.50986	ppCBS-CBS	96h vs 0h
1.88693	2.51612	ppCBS-CBS	96h vs 0h
1.01267	1.64782	ppCBS-CBS	96h vs 0h
1.0672	2.32332	ppCBS-CBS	96h vs 0h
2.94064	3.21515	ppCBS-CBS	96h vs 0h
1.8365	2.61121	ppCBS-CBS	96h vs 0h
-0.500929	1.24565	ppCBS-CBS	96h vs 0h
5.00294	5.51484	ppCBS-CBS	96h vs 0h
1.99554	2.29452	ppCBS-CBS	96h vs 0h
4.18331	6.23994	ppCBS-CBS	96h vs 0h
0.183031	0.740641	ppCBS-CBS	96h vs 0h
0.0944773	-0.20096	ppCBS-CBS	96h vs 0h
1.27845	1.2469	ppCBS-CBS	96h vs 0h
0.612065	0.345435	ppCBS-CBS	96h vs 0h
0.24048	0.377453	ppCBS-CBS	96h vs 0h
-1.1649	0.651373	ppCBS-CBS	96h vs 0h
-2.21957	-1.43182	ppCBS-CBS	96h vs 0h
-2.73276	-2.48451	ppCBS-CBS	96h vs 0h
-0.915278	-1.56813	ppCBS-CBS	96h vs 0h
0.191906	-0.211503	ppCBS-CBS	96h vs 0h
0.182618	-0.241988	ppCBS-CBS	96h vs 0h
-0.0388125	-0.121602	ppCBS-CBS	96h vs 0h
-0.475194	-0.911178	ppCBS-CBS	96h vs 0h
-0.48734	-0.55748	ppCBS-CBS	96h vs 0h
0.0603355	0.227764	ppCBS-CBS	96h vs 0h
0.359855	-0.218659	ppCBS-CBS	96h vs 0h
-0.116342	-0.313056	ppCBS-CBS	96h vs 0h
-0.20314	-0.448836	ppCBS-CBS	96h vs 0h
-0.439299	0.0469231	ppCBS-CBS	96h vs 0h
-1.45797	-1.62717	ppCBS-CBS	96h vs 0h
-0.592856	-0.529502	ppCBS-CBS	96h vs 0h
-0.326408	0.134043	ppCBS-CBS	96h vs 0h
-0.313322	-0.361077	ppCBS-CBS	96h vs 0h
-0.241995	0.247308	ppCBS-CBS	96h vs 0h
0.305322	-0.297193	ppCBS-CBS	96h vs 0h
0.368738	-0.33646	ppCBS-CBS	96h vs 0h
-0.601167	-1.08936	ppCBS-CBS	96h vs 0h
0.539937	-0.144657	ppCBS-CBS	96h vs 0h
-0.121018	-0.141184	ppCBS-CBS	96h vs 0h
0.229533	-0.778776	ppCBS-CBS	96h vs 0h
0.815458	0.139721	ppCBS-CBS	96h vs 0h
-0.355017	-0.870431	ppCBS-CBS	96h vs 0h
0.14411	0.0321807	ppCBS-CBS	96h vs 0h
-0.50471	-2.14083	ppCBS-CBS	96h vs 0h
0.569904	-1.2684	ppCBS-CBS	96h vs 0h
-0.23583	-1.62274	ppCBS-CBS	96h vs 0h
0.174764	-1.04177	ppCBS-CBS	96h vs 0h
0.509807	-0.201384	ppCBS-CBS	96h vs 0h
0.0123261	-0.185993	ppCBS-CBS	96h vs 0h
0.18677	0.372721	ppCBS-CBS	96h vs 0h
-0.023533	-0.0585139	ppCBS-CBS	96h vs 0h
-0.216773	-0.0612392	ppCBS-CBS	96h vs 0h

[truncated: 37 more sheets: Fig. 2h, Fig. 3b-c, Fig. 3f, Fig. 3g, Fig. 3h, Fig. 3i, Fig. 4f, Fig. 5j, Fig. 6a, Fig. 6d-e, Fig. 6f-g, EDF 1a, EDF 1e, EDF 1f, EDF 1g, EDF 1h-j, EDF 1k, EDF 2b, EDF 2c, EDF 2d …]
